# Supplementary material for: Acupuncture-related adverse events: systematic review and meta-analyses of prospective clinical studies
Source: PubMed Central journal article supplement — BMJ Open. 2021 Sep 6;11(9):e045961. doi: 10.1136/bmjopen-2020-045961 (PMC8422480; doi:10.1136/bmjopen-2020-045961), 2021-09-06
Supplement: bmjopen-2020-045961.draft_revisions.pdf [file bmjopen-2020-045961.draft_revisions.pdf]

# BMJ Open

BMJ Open is committed to open peer review. As part of this commitment we make the peer review history of every article we publish publicly available.

When an article is published we post the peer reviewers' comments and the authors' responses online. We also post the versions of the paper that were used during peer review. These are the versions that the peer review comments apply to.

The versions of the paper that follow are the versions that were submitted during the peer review process. They are not the versions of record or the final published versions. They should not be cited or distributed as the published version of this manuscript.

BMJ Open is an open access journal and the full, final, typeset and author-corrected version of record of the manuscript is available on our site with no access controls, subscription charges or pay-per-view fees (<http://bmjopen.bmj.com>).

If you have any questions on BMJ Open's open peer review process please email [info.bmjopen@bmj.com](mailto:info.bmjopen@bmj.com)

# BMJ Open

## Acupuncture related adverse events – systematic review and meta-analyses of prospective clinical trials

|                               |                                                                                                                                                                                                                                                                                                                                                                                                                                                                                |
|-------------------------------|--------------------------------------------------------------------------------------------------------------------------------------------------------------------------------------------------------------------------------------------------------------------------------------------------------------------------------------------------------------------------------------------------------------------------------------------------------------------------------|
| Journal:                      | <i>BMJ Open</i>                                                                                                                                                                                                                                                                                                                                                                                                                                                                |
| Manuscript ID                 | bmjopen-2020-045961                                                                                                                                                                                                                                                                                                                                                                                                                                                            |
| Article Type:                 | Original research                                                                                                                                                                                                                                                                                                                                                                                                                                                              |
| Date Submitted by the Author: | 16-Oct-2020                                                                                                                                                                                                                                                                                                                                                                                                                                                                    |
| Complete List of Authors:     | Baeumler, Petra; University Hospital Munich, Multidisciplinary Pain Centre, Department of Anaesthesiology<br>Zhang, Wenyue; Beijing University of Chinese Medicine, School of Acupuncture, Moxibustion and Tuina, Beijing Rehabilitation Hospital<br>Stübinger, Theresa; University Hospital Munich, Multidisciplinary Pain Centre, Department of Anaesthesiology<br>Irnich, Dominik; University Hospital Munich, Multidisciplinary Pain Centre, Department of Anaesthesiology |
| Keywords:                     | Adverse events < THERAPEUTICS, Risk management < HEALTH SERVICES ADMINISTRATION & MANAGEMENT, Pain management < ANAESTHETICS, COMPLEMENTARY MEDICINE, GENERAL MEDICINE (see Internal Medicine), Quality in health care < HEALTH SERVICES ADMINISTRATION & MANAGEMENT                                                                                                                                                                                                           |
|                               |                                                                                                                                                                                                                                                                                                                                                                                                                                                                                |

SCHOLARONE™  
Manuscripts

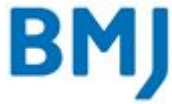

I, the Submitting Author has the right to grant and does grant on behalf of all authors of the Work (as defined in the below author licence), an exclusive licence and/or a non-exclusive licence for contributions from authors who are: i) UK Crown employees; ii) where BMJ has agreed a CC-BY licence shall apply, and/or iii) in accordance with the terms applicable for US Federal Government officers or employees acting as part of their official duties; on a worldwide, perpetual, irrevocable, royalty-free basis to BMJ Publishing Group Ltd ("BMJ") its licensees and where the relevant Journal is co-owned by BMJ to the co-owners of the Journal, to publish the Work in this journal and any other BMJ products and to exploit all rights, as set out in our [licence](#).

The Submitting Author accepts and understands that any supply made under these terms is made by BMJ to the Submitting Author unless you are acting as an employee on behalf of your employer or a postgraduate student of an affiliated institution which is paying any applicable article publishing charge ("APC") for Open Access articles. Where the Submitting Author wishes to make the Work available on an Open Access basis (and intends to pay the relevant APC), the terms of reuse of such Open Access shall be governed by a Creative Commons licence – details of these licences and which [Creative Commons](#) licence will apply to this Work are set out in our licence referred to above.

Other than as permitted in any relevant BMJ Author's Self Archiving Policies, I confirm this Work has not been accepted for publication elsewhere, is not being considered for publication elsewhere and does not duplicate material already published. I confirm all authors consent to publication of this Work and authorise the granting of this licence.

## 1 Acupuncture related adverse events – systematic review and meta-analyses of prospective clinical trials

2  
3  
4 Petra Bäumlér, Wenyue Zhang, Theresa Stübinger, Dominik Irnich

5  
6  
7  
8 Multidisciplinary Pain Centre, Department of Anaesthesiology, LMU University Hospital, Munich, Germany

9  
10 P Bäumlér postdoctoral research assistant

11  
12 D Irnich professor of medicine

13  
14 T Stübinger doctoral graduate

15  
16 School of Acupuncture, Moxibustion and Tuina, Beijing University of Chinese Medicine & Beijing Rehabilitation  
17 Hospital, Beijing, China

18  
19 W Zhang doctoral graduate

### 20 21 Corresponding author

22  
23 Dr. biol. hum. Petra I. Bäumlér, MSc, MPH

24  
25 Multidisciplinary Pain Centre, Department of Anaesthesiology

26  
27 LMU University Hospital Munich

28  
29 Pettenkoferstr. 8a, 80336 Munich

30  
31 E-mail: Petra.Baeumlér@med.uni-muenchen.de

32  
33 ORCID-ID: 0000-0002-3262-2993

34  
35 “The Corresponding Author has the right to grant on behalf of all authors and does grant on behalf of all authors, a  
36 worldwide licence to the Publishers and its licensees in perpetuity, in all forms, formats and media (whether known  
37 now or created in the future), to i) publish, reproduce, distribute, display and store the Contribution, ii) translate the  
38 Contribution into other languages, create adaptations, reprints, include within collections and create summaries,  
39 extracts and/or, abstracts of the Contribution, iii) create any other derivative work(s) based on the Contribution, iv) to  
40 exploit all subsidiary rights in the Contribution, v) the inclusion of electronic links from the Contribution to third party  
41 material where-ever it may be located; and, vi) licence any third party to do any or all of the above.”

### 42 43 44 45 46 Word count

47  
48 6234



## Abstract

### Objective

Overview on risks for acupuncture related adverse events (AE).

### Design

Systematic review and meta-analysis of prospective studies.

### Data sources

Pubmed, Scopus, and EMBASE from inception date to September 15, 2019.

### Eligibility criteria for selecting studies

Prospective studies assessing AE caused by needle acupuncture in humans as primary outcome published in English or German

### Data extraction and synthesis

Two independent researchers selected articles, extracted the data and assessed study quality. Overall risks and risks for different AE categories were obtained from random effects meta-analyses.

### Main outcomes

Overall risk for minor AE and serious AE (SAE) per patients and per treatments

### Results

Out of 7679 screened articles 22 reporting on 21 studies were included. Meta-analyses suggest at least one AE occurring in 9.31% (95%-CI 5.10 to 14.62; 11 studies) of patients undergoing an acupuncture series and in 7.57% (95%-CI 1.43 to 17.95; 5 studies) of treatments. Summary risk estimates for SAE were 1.01 (95%-CI 0.23 to 2.33; 11 studies) per 10,000 patients and 7.98 (95%-CI 1.39 to 20.00; 14 studies) per 1 million treatments, for AE requiring treatment 1.14 (95%-CI 0.00 to 7.37; eight studies) per 1000 patients. Heterogeneity was substantial ( $I^2 > 80\%$ ). On average 9.4 AE occurred in 100 treatments of which half were bleeding, pain, or flare at the needle site argued to represent intended acupuncture reaction. AE definitions and assessments varied largely.

### Conclusion

Acupuncture can be considered among the safer treatments in medicine. SAE are rare, and most common minor AE are very mild. AE requiring medical management are uncommon, but necessitate medical competence to assure patient safety. Clinical and methodological heterogeneity call for standardized AE assessments tools, clear criteria for differentiating acupuncture related AE from therapeutically desired reactions, and identification of patient related risk factors for AE.

### PROSPERO registration number

CRD42020151930

## Keywords

Adverse effects, adverse reactions, meta-analysis, safety, risk, pneumothorax

### Strengths and limitations of this study

- First systematic review on acupuncture related adverse events including a risk of bias assessment
- First meta-analyses on adverse events related to acupuncture
- Complying with PRISMA guidelines
- Combining studies with heterogeneous AE definitions, but providing respective sensitivity analyses
- Causality assessment based on descriptions of adverse events as available from the included articles

For peer review only

## Introduction

Acupuncture describes the insertion of fine needles at defined points on the patients' body for therapeutic or preventive purposes. It is used worldwide with growing popularity. In the EU acupuncture was identified as the most frequently provided method of complementary and alternative medicine (CAM) with 80,000 physicians and 16,380 non-medical practitioners.(1) In the UK alone 2.3 million traditional acupuncture treatments are carried each year.(2) In the US the number of acupuncturists doubled between 2002 and 2012.(3) The effectiveness of acupuncture is supported by level 1a evidence e.g. for chronic musculoskeletal pain and headache,(4-6) post-operative pain,(7, 8) post-operative nausea and vomiting,(9) as well as allergic rhinitis.(10) Furthermore, promising evidence exists for its potential role in the treatment of a large number of additional indications such as stroke rehabilitation,(11) depression,(12) aromatase inhibitor induced arthralgia,(13) and asthma.(14) Thus, acupuncture offers a non-pharmacological treatment option for various highly prevalent conditions with great disease burden and significant health economic impact. Long-term pharmacological treatment of these conditions is often associated with substantial side effects.(15, 16) Consequently, also risk estimates on acupuncture related adverse events (AE) are required for evidence-based risk benefit considerations that are essential for clinical decision making.

However, uncertainty remains about acupuncture safety. AE related to acupuncture are repeatedly and controversially discussed both in scientific literature as well as in public media. An overview of systematic reviews in 2017 (17) illustrates that many of the previous reviews on the safety of acupuncture just summarized case reports or case series. In turn, those reviews including studies that do allow for AE frequency estimation, such as cohort studies and large RCTs, mostly only addressed certain types of AE, particular patient groups, restricted acupuncture regimens, or certain countries. These data are surely important for clinical decision making in particular cases, but leave the overall risk of acupuncture related AE in the general population obscure. Additionally, debate exists about differentiating AE from therapeutically intended reactions that are claimed to form part of the acupuncture treatment. For example, international consensus exists that aggravation of symptoms represents an AE, since disease burden increases, although transient worsening of symptoms followed by long-term improvements can be interpreted as a so called healing crisis in complementary and alternative medicine.(18) In contrast, such consensus is still missing for local reactions such as small bleedings upon needle withdrawal, needling pain, and flare around the needling site. These are also referred to as beneficial signs by acupuncture experts and in standard text books and have been linked to neurophysiological mechanisms of acupuncture, suggesting that quality and intensity of these events should be considered when classifying them as AE.(19-21)

The last review on prospective studies on AE related to acupuncture with high external validity dates back to 2001,(22) did not meta-analytically summarize AE risk estimates and did not assess the quality of included studies. In addition, inconsistency and incompleteness of reporting in primary studies hampered the drawing of firm conclusions on acupuncture safety. Since then various large-scale clinical trials and nationwide surveys on acupuncture safety have been conducted.

Therefore, it was the aim of this review to provide an up to date summary of prospective trials that were particularly designed to evaluate AE related to needle acupuncture with manual or electrical stimulation in combination with or without moxibustion.

## Methods

We systematically reviewed prospective studies that reported on acupuncture related AE. The protocol has been registered at the International prospective register of systematic reviews (PROSPERO) (23) on September 25, 2019 (registration number CRD42020151930; online supplementary appendix S1). The research checklist according to the

1 preferred reporting items for systematic reviews and meta-analyses (PRISMA) (24) is displayed in the online  
2 supplementary appendix S2.

### 3 Search strategy

4 We searched Pubmed, Scopus, and EMBASE for articles published before September 15, 2019 by applying the following  
5 search strategy: 1: acupuncture; 2: "adverse event"; 3:"adverse events"; 4: "adverse effect"; 5: "adverse effects"; #1  
6 AND #2; #1 AND #3; #1 AND #4; #1 AND #5. Additional records were identified from previous reviews on acupuncture  
7 related AE.(17)  
8

### 9 In- and exclusion criteria

10 We included articles reporting on prospective studies assessing AE associated with needle acupuncture involving  
11 manual or electrical stimulation combined with or without moxibustion in humans as their primary outcome. Only  
12 articles published in English or German were included. Publications on assessments of acupuncture point injection  
13 therapies or non-penetrating acupuncture point stimulation such as laser acupuncture, acupressure or transcutaneous  
14 electrical nerve stimulation (TENS) were excluded. We also excluded articles reporting solely on moxibustion or  
15 restricted acupuncture regimens such as press-needle, auricular or one-point acupuncture. Trials focusing just on one  
16 type of acupuncture related AE or just on a narrowly defined patient population were excluded.  
17

### 18 Article selection and data extraction

19 Article selection was performed independently by two reviewers (WZ and PB, TS and PB, or LM and PB). Retrieved  
20 records were first screened for eligibility by abstract. Full texts were obtained for the remaining articles. Final decision  
21 about eligibility was obtained by consensus of all four reviewers.  
22

23 Estimates of overall risks and risks for each reported type of AE were extracted as absolute number of patients with  
24 AE per total number of patients and treatments with AE per total number of treatments. Data concerning AE from  
25 sham- or placebo-acupuncture treatments were not extracted. The different types of AE were assigned to one of the  
26 following categories: bleeding, local pain, other local AE, distant pain, central nervous system, peripheral nervous  
27 system, vegetative nervous system, motor system, gastrointestinal / gynaecological system, cardiovascular system,  
28 respiratory system, generalized skin reactions, headache, emotional interference, sleeping problems, AE related to  
29 moxibustion, needling malpractice, aggravation of symptoms, other or unclassified AE (online supplementary  
30 appendix S3).  
31

32 Following the differentiation between AE and adverse drug reactions (ADR) defined by the International Conference  
33 on Harmonization (ICH) of Good Clinical Practice,(25) articles were classified into reports on adverse events  
34 irrespective of their causal relationship to acupuncture and adverse reactions for which a causal relationship was a  
35 reasonable possibility. Serious adverse events (SAE) were reported as indicated in the included articles as in  
36 accordance with the ICH-criteria. These include any untoward medical occurrence that at any dose results in death, is  
37 life-threatening, requires inpatient hospitalization, or prolongation of existing hospitalization, results in persistent or  
38 significant disability / incapacity, or is a congenital anomaly / birth defect.(25) Causality assessment of SAE was  
39 performed by independent acupuncture therapists who were medical doctors who received more than 300 hours of  
40 acupuncture training and with more than ten years of intensive acupuncture practice. As the basis of this assessment  
41 was limited to incomplete information provided in the articles lacking e.g. time references, categories of SAE causality  
42 were reduced to possibly or unlikely related to acupuncture or unclassifiable.  
43  
44  
45  
46  
47  
48  
49  
50  
51  
52  
53  
54  
55  
56  
57  
58  
59  
60

1 AE risk estimates given as patients with AE per total number of patients were interpreted according to the guidelines  
2 of the Council for International Organizations of Medical Sciences (CIOMS) as very common ( $\geq 1/10$  patients), common  
3 ( $\geq 1/100$  to  $< 1/10$ ), uncommon ( $\geq 1/1,000$  to  $< 1/100$ ), rare ( $\geq 1/10,000$  to  $< 1/1,000$ ), or very rare ( $< 1/10,000$ ).<sup>(26)</sup>  
4  
5 Documentation of study characteristics included study type, country in which the study was conducted, reporter,  
6 method and time point of AE assessment, complaint as well as age and gender structure of the study population,  
7 average number and frequency of treatments per patient, average number of needles per treatment, needle in time,  
8 acupuncture style, and method of needle stimulation, as well as number, gender, training, and years of experience of  
9 acupuncturists. Data on patients' and acupuncturists' AE reports from the article published by Weidenhammer et al.  
10 in 2008 were handled as two separate trials.  
11  
12  
13

#### 14 Risk of bias assessment

15  
16 Included studies were assessed for risk of bias according to a checklist developed by Faillie and colleagues for  
17 systematic reviews focusing on drug adverse events.<sup>(27)</sup> This checklist is applicable to RCTS, cohort studies, case-  
18 control studies, nested case-control studies, and systematic reviews. The questions are structured in 8 risk of bias  
19 domains. Possible answers are "Not applicable" (n/a), "Yes" (Y), "Unclear" (U), or "No" (N). A summary risk of bias  
20 assessment is provided for each domain as well as for the whole study. According to the inclusion criteria of this review,  
21 questions concerning systematic reviews, cross-over trials, and case-control studies were not applicable.  
22  
23  
24

#### 25 Data analysis

26  
27 Data were analysed using the package meta implemented in R.<sup>(28)</sup> Pooled estimates with 95% confidence intervals  
28 (CI) for overall AE risk and risks of different types of AE were obtained from proportion meta-analyses. Random effects  
29 models were calculated by the Hartung-Knapp method with arcsine transformation of proportions. Cochran Q test,  
30 and  $I^2$  statistics were used to assess the heterogeneity of included studies. Analysis were performed for the overall  
31 risks as well as the risks for the different types of AE given as the number of patients with AE per total number of  
32 patients undergoing an acupuncture series and as the number of treatments with AE per total number of treatments  
33 performed. AE that were reported separately in the articles, but that were allocated to the same AE category, were  
34 treated as they had occurred in different patients or treatments, respectively. Sensitivity analyses were performed for  
35 studies that explicitly only reported about AE that had, at the discretion of the assessors', a causal relationship to  
36 acupuncture treatments.  
37  
38  
39  
40

41  
42 None of the articles reported the mean and variance of the number of AE per treatment. Thus, the expected number  
43 of AE per treatment could not be estimated by meta-analysis but just by considering the sum of AE relative to the sum  
44 of treatments. An additional sensitivity analysis was performed by excluding AE that are usually very mild and transient  
45 or are often argued to be part of the treatment or a desired treatment response, such as transient bleeding, needle  
46 site pain, or a flare around the needle insertion point. AE of such type that were indicated by any means as significant  
47 were not excluded for this sensitivity analysis.  
48  
49  
50

#### 51 Patient and public involvement

52  
53 No patients were involved in defining the research question, the outcome measures, the design or conduct of this  
54 review. No patients were asked to advise on interpretation of results. Authors will share the results during patient  
55 seminars and information events. A concise version of the results will be made available for non-profit acupuncture  
56 organisations to be presented on their webpages.  
57  
58  
59  
60

## Results

### Study characteristics

7677 records were retrieved from the database search and two were identified from previous reviews on acupuncture related adverse events. 7499 records could be screened by abstract and for 180 articles full-texts were obtained. A total of 22 articles reporting on 21 studies covering 12.9 million treatments met our inclusion criteria (Figure 1).(29-50) In two studies different data assessments on different subpopulations were performed and are treated independently in the present analyses. In one study patient reported AE were assessed after one of the first treatments and three months after treatment,(36, 37) and in one large study AE were documented by therapists and in addition by a subgroup of patients.(44)

Study characteristics are provided in table 1. The four largest trials with one to five hundred thousand patients treated in over 750 thousand acupuncture sessions were cohort studies performed as part of the German Model Projects on Acupuncture (*Modellvorhaben Akupunktur*).(31, 39, 44, 47) Three nationwide surveys from the UK (described in four articles),(36-38, 46) one in-house surveillance report from Japan (49) and one summary of AE assessments nested within three Chinese RCTs (50) included two to six thousand patients receiving over 30 thousand treatments, respectively. In three surveys, two from South-Korea,(42, 43) one from Japan, (33) and one from Brazil,(30) around one to two thousand patients were included and treated in up to 14 thousand acupuncture sessions. One nationwide survey conducted in Sweden reported on the risk of AE based on data from over nine thousand acupuncture sessions.(41) In seven studies less than 500 patients receiving maximum 3.5 thousand treatments were included; four AE assessments nested within RCTS or clinical trials from China,(34, 45) Hong-Kong,(29) and Sweden,(35) one Japanese (48) and one German survey (32) as well as one German cohort study.(40) In most studies acupuncture was used to treat pain in middle aged patients. In six articles no details on the patients' condition were provided.(32, 33, 38, 41, 46, 48) Two articles reported explicitly on short-term AE after one particular treatment only.(37, 43) All but five articles provided sufficient information to infer that acupuncturists had a firm medical background and / or had received intensive acupuncture training.(32, 34, 35, 40, 41) One German survey also included "other practitioners" most likely non-medical practitioners (*Heilpraktiker*) with non-standardized acupuncture training.(32)

Eight articles described AE reported by patients only (29, 30, 35-37, 43, 44, 47) and seven articles AE reported by acupuncturists only.(31, 38, 39, 42, 44, 46, 49) As before said Weidenhammer et al. described therapists' and patients' reports on AE separately.(44) Zhao et al. combined the AE reports from patients and acupuncturists.(50) In five articles it was explicitly stated that acupuncturists recording the AE also queried their patients about any uncomfortable experience during or after treatment.(32-34, 41, 48) In two trials AE were documented by an independent assessor.(40, 45) In eight of the 22 included articles AE were reported irrespective of their relationship to acupuncture,(29, 31, 32, 35, 38, 46, 49, 50) while descriptions of AE assessments in twelve articles suggest that only AE related to the acupuncture treatment were documented,(30, 33, 34, 36, 37, 40-42, 44, 47, 48) and one article did not provide information about the AE definition.(43) Further discrepancies were found in definitions of certain reactions as therapeutically intended. For example, da Silva et al. did not count aggravation of symptoms as AE, because of difficulties in determining causality as well as severity and because of common notion among practitioners that transient worsening forms part of the acupuncture treatment.(30) In contrast White et al. reported observations of aggravated symptoms as AE, but only those that were not followed by substantial improvements.(46) In contrast, the other articles did not specify aggravation of symptoms further.(31-33, 35, 36, 40, 44, 47, 48) In addition, Endres et al. did report on erythema at the needling site (which was accounted for in the present analysis), but did not include it in their overall AE incidence report, as this can also be regarded as desired acupuncture reaction.(31)



| 1 <sup>st</sup> Author year       | Country     | Study type                          | Patients          |                       |                                                                                                                     | Treatments              |                          |                 |               | Acupuncturists                |                              |                         |                                 | AE assessment          |                                                                   |                                             |
|-----------------------------------|-------------|-------------------------------------|-------------------|-----------------------|---------------------------------------------------------------------------------------------------------------------|-------------------------|--------------------------|-----------------|---------------|-------------------------------|------------------------------|-------------------------|---------------------------------|------------------------|-------------------------------------------------------------------|---------------------------------------------|
|                                   |             |                                     | n total (female)  | Age [a]               | Indication                                                                                                          | n (total)               | n / patient              | n needles       | Stimulation   | n total (n female)            | Medical background           | Acupuncture training    | Acupuncture practice            | Reporter               | Tool                                                              | Time point                                  |
| 1 Chung 2015                      | Hong-Kong   | RCT                                 | 59 (46)*          | 49 ± 10*              | Insomnia in major depressive disorder                                                                               | 531                     | 9 / 3 w                  | 14              | EA            | n.i.                          | TCM doctors                  | n.i.                    | > 3 a                           | P                      | SL & OQ any AE                                                    | after 3rd, 6th, 9th treatment               |
| 2 da Silva 2014                   | Brazil      | Cohort monocentric                  | 1157 (n.i.)       | n.i.                  | Musculoskeletal, emotional & respiratory disorders i.a.                                                             | 13,884                  | 12 <sup>#</sup>          | n.i.            | MA            | n.i.                          | MD                           | in training             | n.i.                            | P                      | SL & OQ AE related to acu.                                        | after each treatment                        |
| 4 Endres 2004                     | Germany     | Cohort nationwide private clinics   | 190,924 (130,974) | f: 58 ± 16 m: 55 ± 15 | Chronic headache, LBP or arthrosis (> 6 m)                                                                          | 1.77 M                  | apx. 10 / 4 - 8 w        | n.i.            | n.i.          | 12,000 (n.i.)                 | MD                           | > 140 h                 | n.i.                            | A                      | SL & OQ any AE                                                    | after last treatment                        |
| 5 Ernst 2003                      | Germany     | Survey private practices            | 409 (279)         | n.i.                  | n.i.                                                                                                                | 3,535                   | f: 9.0 m: 7.9            | n.i.            | n.i.          | 29 (n.i.)                     | MD & other practitioners     | n.i.                    | n.i.                            | A                      | SL & OQ any AE                                                    | after each treatment; at subsequent visit   |
| 6 Furuse 2017                     | Japan       | Survey 8 acupuncture clinics        | 2180 (1288)       | 54 ± 19               | n.i.                                                                                                                | 14,039                  | 6.4 <sup>#</sup>         | n.i.            | MA, EA & Moxa | 232 (93)                      | Japanese lic. acupuncturists | > 3 a                   | 9 ± 10 a                        | A also asking P        | SL AE related to acu.                                             | after each treatment; at subsequent visit   |
| 8 Leung 2009                      | Hong-Kong   | 11 clinical trials (not specified)  | 254 (n.i.)        | n.i.                  | Chronic pain, neurological & urological conditions                                                                  | 2,000                   | n.i.                     | 5 avg.          | MA & EA       | 2 (n.i.)                      | TCM doctors                  | n.i.                    | n.i.                            | A also asking P        | SL AE related to acu.                                             | after each treatment & subsequent visit     |
| 10 List 1992                      | Sweden      | RCT monocentric                     | 29 (n.i.)         | median 40**)          | Craniomandibular disorder                                                                                           | apx. 174                | ≥ 6 / 6 - 8 w            | 12 avg.         | MA & EA       | 1 (0)                         | n.i.                         | n.i.                    | n.i.                            | P                      | SL & OQ any AE                                                    | after last treatment                        |
| 11 MacPherson 2001                | UK          | Survey nationwide private practices | n.i.              | n.i.                  | n.i.                                                                                                                | 34,407                  | n.i.                     | 1 - 20          | n.i.          | 574 (374)                     | MD & physio-therapists       | 1 - 2 a 11% ≥ 3 a 89%   | < 10 a apx. 60% ≥ 10 a apx. 40% | A                      | SL & OQ any AE                                                    | upon recognition                            |
| 13 MacPherson 2004 <sup>A</sup>   | UK          | Survey nationwide private practices | 6,348 (4,821)     | 52 ± 15               | Musculoskeletal, psychological, general, neurological, gynecological, obstetric & respiratory conditions; wellbeing | 30,196                  | 4.8                      | n.i.            | MA & EA       | 638 (406)                     | MD & physio-therapists       | > 3 a                   | < 10 a 58% ≥ 10 a 42%           | P                      | SL & OQ AE related to acu.                                        | 3 m after inclusion                         |
| 14 MacPherson 2005 <sup>A</sup>   |             |                                     | 9,408 (6,961)     | 51                    |                                                                                                                     | 9,408                   | 1                        |                 |               | SL imm. AE AE related to acu. |                              |                         |                                 |                        | After the 1 <sup>st</sup> / one of the 1 <sup>st</sup> treatments |                                             |
| 16 Melchart 1998                  | Germany     | Cohort monocentric                  | 121 (88)          | 54 ± 13               | Mainly chronic pain                                                                                                 | apx. 1,200              | 9.9 ± 4.7                | n.i.            | n.i.          | n.i.                          | TCM doctors                  | n.i.                    | n.i.                            | Independent A asking P | SL & FT AE related to acu.                                        | at subsequent visit                         |
| 17 Melchart 2004                  | Germany     | Cohort nationwide private clinics   | 97,733 (78,675)   | 55 ± 16               | Chronic headache, osteoarthritis, LBP                                                                               | apx. 760,000            | 7.8 ± 2.4                | 12.6 ± 5.1      | n.i.          | 7050 (n.i.)                   | MD                           | > 140 h (19% > 350 h)   | n.i.                            | A                      | SL & FT AE related to acu.                                        | after last treatment                        |
| 18 Odsberg 2001                   | Sweden      | Survey private practices            | n.i.              | n.i.                  | n.i.                                                                                                                | 9,277                   | n.i.                     | n.i.            | MA & EA       | 187 (n.i.)                    | Physio-therapists            | n.i.                    | n.i.                            | A also asking P        | n.i. AE related to acu.                                           | after each treatment                        |
| 20 Park 2009                      | South-Korea | Survey two-centred                  | 1,095 (696)       | 58 ± 13               | Stroke, headache, hypertension, dizziness, i.a.                                                                     | 1,095                   | 1                        | n.i.            | n.i.          | 8 (n.i.)                      | Korean medicine              | n.i.                    | >10a                            | P                      | n.i.                                                              | after 1 arbitrary treatment                 |
| 21 Park 2010                      | South-Korea | Survey private practices            | 2,226 (n.i.)      | n.i.                  | n.i. (patients with AE mainly pain conditions)                                                                      | 3,071                   | 1.4 / ≤ 5 w <sup>#</sup> | n.i.            | n.i.          | 13 (n.i.)                     | Oriental medicine.           | 6 a                     | < 3a 70% ≥ 3a 30%               | A                      | SL AE related to acu.                                             | upon recognition                            |
| 23 Weidenhammer 2008 <sup>B</sup> | Germany     | Cohort nationwide private clinics   | 503,397 (40,5235) | 54 ± 16               | Chronic headache, LBP, osteoarthritis (> 6 m)                                                                       | 4.2 M                   | 8.4 (2.9)                | n.i.            | n.i.          | 9918 (3570)                   | MD                           | 140 h (22% > 350 h)     | n.i.                            | A                      | SL & FT AE related to acu.                                        | after last treatment                        |
| 24                                |             |                                     | 882847 (n.i.)     | n.i.                  |                                                                                                                     | 7.9 M                   | n.i.                     |                 |               | 7                             |                              |                         |                                 |                        | OO - SAE only AE related to acu.                                  | upon recognition                            |
| 25                                |             |                                     | 5,998 (5,072)     | 55 ± 15               |                                                                                                                     | apx. 51582 <sup>#</sup> | 8.6 (3.0)                |                 |               | 9429 (n.i.)                   |                              |                         |                                 |                        | OO AE related to acu.                                             | after last treatment                        |
| 27 Wen 2016                       | China       | RCT monocentric                     | 120 (84)          | 59 ± 7                | Posterior circulation ischemia                                                                                      | 1,680                   | 14 / 3 - 4 w             | ≤ 9             | MA            | 1 (n.i.)                      | n.i.                         | n.i.                    | > 20 a                          | Blinded assessor       | n.i. AE related to acu.                                           | after each treatment                        |
| 28 White 2001                     | UK          | Survey private practices            | n.i.              | n.i.                  | n.i.                                                                                                                | 31,822                  | n.i.                     | n.i.            | n.i.          | 78 (29)***)                   | MD & physio-therapists       | ≤ 100 h 43% > 100 h 57% | ≤ 10 a 65% > 10 a 35%           | A                      | SL & OQ any AE                                                    | upon recognition                            |
| 30 Witt 2009                      | Germany     | Cohort nationwide private clinics   | 229,230 (148,541) | 51 ± 14               | Chronic headache, osteoarthritis, LBP, all. rhinitis, asthma, dysmenorrhoea                                         | 2.2 M                   | 10.2 ± 3.0               | n.i.            | n.i.          | 13579 (5418)                  | MD                           | > 140 h (15% > 350h)    | 6.9 ± 5.3 a                     | P                      | OO AE related to acu.                                             | after last treatment                        |
| 32 Yamashita 1999                 | Japan       | In-house surveillance               | 5,008 (2,804)     | Mostly 40 - 50 a      | Musculoskeletal disorder, miscellaneous complaints                                                                  | 65,482                  | 13 avg.                  | n.i.            | MA, EA & Moxa | 84 (n.i.)                     | Japanese lic. acupuncturists | > 3 a                   | < 1 a 64% ≥ 1 a 36%             | A                      | OO any AE                                                         | upon recognition                            |
| 34 Yamashita 2000                 | Japan       | Survey monocentric                  | 391 (n.i.)        | 12 - 88               | n.i.                                                                                                                | 1,441                   | 3.7 <sup>#</sup>         | 21 <sup>#</sup> | MA & EA       | 7 (n.i.)                      | Japanese lic. acupuncturists | > 3 a                   | n.i.                            | A also asking P        | OO AE related to acu.                                             | after each treatment; at subsequent visit   |
| 35 Zhao 2011                      | China       | 3 RCTs multicenter                  | 1,968 (1,239)     | 39 ± 14               | Migraine, dyspepsia, Bell's palsy                                                                                   | 39,360                  | 20 / 4 w                 | 2 - 5           | MA & EA       | n.i.                          | TCM doctors                  | ≥ 8 a                   | > 10 a                          | P & A                  | SL & OQ any AE                                                    | after each treatment & after last treatment |

Table 1: Study characteristics

AE: adverse event; SAE: serious adverse event; acu: acupuncture; MA: manual acupuncture; EA: electroacupuncture; Moxa: moxibustion; m: male, f: female; LBP: low back pain; MD: medical doctors; lic.: licensed; TCM: Traditional Chinese Medicine; SL: selection list; OO: open questions, FT: free text; P: patients; A: acupuncturists; imm.: immediate; X ± X: mean ± standard deviation; a: year; w: weeks; h: hours; M: million; avg.: on average; i.a. inter alia; apx.: approximately; n.i.: not indicated; <sup>A</sup>) overlapping study populations from the same survey <sup>B</sup>) reports of patients and therapists separately presented; \*) including one drop out prior to treatment; \*\*) refers to total study population (n=61); \*\*\*) further professional details only provided by 59 acupuncturists; <sup>#</sup>) approximation based on other reported data

### Overall risk of acupuncture related adverse events

Meta-analysis of 11 studies including 845,637 patients estimated the overall risk for at least one AE during a series of acupuncture treatments to be 9.31 (95%-CI 5.10 to 14.62) per 100 patients treated (Figure 2A). (29, 32, 34, 36, 39, 40, 44, 45, 47, 50) The median number of treatments per patient was 9 (min 4.8; max 14), and the total number of treatments exceeded 7.4 million. Visual inspection neither indicated an association of the incidence of AE with the number of treatments per acupuncture series nor with the study type (online supplementary appendix S4). Five studies reported the total number of acupuncture treatments with AE relative to the total number of treatments performed. (30, 32, 34, 38, 40) Meta-analysis of these studies covering 55,026 treatments in total resulted in a risk of 7.57 (95%-CI 1.43 to 17.95) treatments with AE per 100 treatments (Figure 2B). Sensitivity analysis of studies reporting on adverse acupuncture reactions and not on AE irrespective of their relationship to acupuncture treatments resulted in similar estimates (30, 34, 36, 38, 39, 44, 45, 47); 8.23 (95%-CI 6.42 to 10.25) patients with at least one AE out of 100 patients (Figure 2C) and 6.08 (95%-CI 0.00 to 38.76) treatment with AE out of 100 treatments (Figure 2D). Heterogeneity for all meta-analyses mentioned above (including the sensitivity analyses) was substantial as indicated by an  $I^2$  between 98% and 100% ( $p < 0.01$ ).

Thirteen articles reported the incidences of different types of AE per treatment (table 2). (30, 32-34, 37, 38, 40-43, 46, 48, 49) The average number of AE per 100 treatments varied between 0.14 and 69.12. In total 18,002 AE were reported in of 190,661 treatments, which makes on average 9.44 AE per 100 treatments. Exclusion of AE that are usually mild and transient or are often argued to be part of the treatment or a desired treatment response, such as transient bleeding, needle site pain, or a flare around the needle insertion point, reduced this number to 4.81 (min - max 0.10 – 36.92) AE per 100 treatments.

| Study           | Number of treatments | Number of AE |                                  | AE incidence per 100 treatments |                                  | Bleeding, pain, flare at needling site as % of all AE |
|-----------------|----------------------|--------------|----------------------------------|---------------------------------|----------------------------------|-------------------------------------------------------|
|                 |                      | total        | excluding bleeding, pain & flare | total                           | excluding bleeding, pain & flare |                                                       |
| Park 2009       | 1095                 | 193          | 64                               | 17.63                           | 5.84                             | 66.84%                                                |
| Ernst 2003      | 3535                 | 632          | 403                              | 17.88                           | 11.40                            | 36.23%                                                |
| Melchart 1998   | 1200                 | 120          | 66                               | 10.00                           | 5.50                             | 45.00%                                                |
| Yamashita 1999  | 65482                | 94           | 67                               | 0.14                            | 0.10                             | 28.72%                                                |
| Yamashita 2000  | 1441                 | 996          | 114                              | 69.12                           | 7.91                             | 88.55%                                                |
| MacPherson 2001 | 34407                | 4544         | 3406                             | 13.21                           | 9.90                             | 25.04%                                                |
| Odsberg 2001    | 9277                 | 2108         | 390                              | 22.72                           | 4.20                             | 81.50%                                                |
| White 2001      | 31822                | 2176         | 820                              | 6.84                            | 2.58                             | 62.32%                                                |
| MacPherson 2005 | 9408                 | 5071         | 3473                             | 53.90                           | 36.92                            | 31.51%                                                |
| Leung 2009      | 2000                 | 8            | 0                                | 0.40                            | 0.00                             | 100.00%                                               |
| Park 2010       | 3071                 | 99           | 26                               | 3.22                            | 0.85                             | 73.74%                                                |
| da Silva 2014   | 13884                | 1107         | 117                              | 7.97                            | 0.84                             | 89.43%                                                |
| Furuse 2017     | 14039                | 854          | 232                              | 6.08                            | 1.65                             | 72.83%                                                |
| <b>Overall</b>  | <b>190661</b>        | <b>18002</b> | <b>9178</b>                      | <b>9.44</b>                     | <b>4.81</b>                      | <b>49.02%</b>                                         |

Table 2: Number of adverse events (AE) per treatment



### Serious acupuncture related adverse events

SAE were observed in five studies including 1,182,860 patients undergoing 10,570,678 treatments with incidences between two and 40 SAE in 100,000 patients undergoing a treatment series and between two and 99 in one million treatments, respectively.(31, 36, 39, 44, 49) Four articles reported that none of the AE observed in a total of 1,922 patients undergoing 19,005 treatments required medical treatment,(30, 34, 45, 48) and authors of five articles concluded that none of the AE observed in 122,699 treatments fulfilled the ICH-criteria for SAE.(33, 38, 42, 46, 50) Eight articles did not mention SAE or any AE description that allowed for inferences on SAE.(29, 32, 35, 37, 40, 41, 43, 47)

Meta-analyses of the overall risk for a SAE resulted in 1.01 (95%-CI 0.23 to 2.33) patients with SAE in 10,000 patients undergoing an acupuncture series (Figure 3A, 11 studies 1,188,930 patients) and 7.98 (95%-CI 1.39 to 20.00) SAE in one million treatments (Figure 3B, 14 studies 10,712,382 treatments). Exclusion of studies with zero SAE incidences changed these estimates to 1.47 (95%-CI 0.10 to 4.46) in 10,000 patients suffering from a SAE when undergoing an acupuncture series and 16.90 (95%-CI 0.49 to 56.60) in one million treatments causing an SAE. Sensitivity analyses of studies that only reported reactions with a plausible relationship to acupuncture resulted in risk estimates of 0.45 (95%-CI 0.06. to 1.18) SAE per 10,000 patients (Figure 3C) and 5.45 (95%-CI 0.50 to 15.67) per one million treatments (Figure 3D). Again, heterogeneity between studies included in these two meta-analyses was substantial ( $I^2 > 85\%$ ,  $p < 0.001$ ).

The causality assessment of the 73 SAE conducted by two acupuncture experts (table 3) resulted in 32 SAE (44%) being possibly related to acupuncture. Among those, pneumothorax, strong cardiovascular or vasovagal reactions, and fall or trauma were the most frequent SAE with a frequency of 1 to 3 cases in one million treatments each. One article that was not taken into account in the SAE meta-analyses as observed AE were not categorized in minor AE and SAE also reported two cases of pneumothorax in over 200,000 patients receiving on average 10 acupuncture treatments.(47) One of the included trials documented deaths occurring in the study population. Nineteen SAE (26%) were rate as unlikely related to acupuncture. Among those were nine deaths observed in one study in patients of an age between 67 and 87 years and related to a pre-existing health conditions.(31) Authors reported that the resulting death rate of 4.71 per 100,000 patients is below the expected death rate derived from population statistics. Other SAE classified as unlikely related to acupuncture were a circulatory reaction with amnesia, suicidal tendencies, acute general infection, a car crash two days after treatment, a malignant parotid tumour, tonic-clonic seizures, and an ophistotonus. Twenty-two SAE (30%), intervertebral disk prolapses and hospitalizations due to pain exacerbation or unknown reasons, were rated as "unclassifiable".

| Endres 2004                                                                                    |                |    | Melchart 2004                                                                                                                |           |   |
|------------------------------------------------------------------------------------------------|----------------|----|------------------------------------------------------------------------------------------------------------------------------|-----------|---|
|                                                                                                | Causality      | n  |                                                                                                                              | Causality | n |
| - Death                                                                                        | unlikely       | 9  | - Exacerbation of depression                                                                                                 | possible  | 1 |
| - Fall or trauma, with or without fracture                                                     | possible       | 4  | - Hypertensive crisis                                                                                                        | possible  | 1 |
| - Acute general infection with hospitalization                                                 | unlikely       | 2  | - Vasovagal reaction                                                                                                         | possible  | 1 |
| - Allergic reaction to concomitant medication (atopy)                                          | possible       | 1  | - Asthma attack with hypertension and angina                                                                                 | possible  | 1 |
| - Stroke with hospitalization                                                                  | unlikely       | 3  | - Pneumothorax                                                                                                               | possible  | 2 |
| - Cardiovascular problems (hospital admission)                                                 | possible       | 3  | Yamashita 1999                                                                                                               |           |   |
| - Intervertebral disk prolapse, pain exacerbation with hospital admission                      | unclassifiable | 5  | - Hospitalization of patient with asthma because of coughing                                                                 | possible  | 1 |
| - Malignant parotid tumor (hospital admission)                                                 | unlikely       | 1  | - 1 case of deep burn that recovered after 2 years                                                                           | possible  | 1 |
| - Hospitalization (unknown reasons)                                                            | unclassifiable | 17 |                                                                                                                              |           |   |
| Weidenhammer 2008 ther.                                                                        |                |    | MacPherson 2004                                                                                                              |           |   |
|                                                                                                | Causality      | n  |                                                                                                                              | Causality | n |
| - Pneumothorax                                                                                 | possible       | 5  | - Low back pain in breast cancer patient, hospital admission, disappeared without medication, since then no more LBP         | possible  | 1 |
| - Suicidation in a patient with borderline syndrome                                            | unlikely       | 1  | - Car crash 2d after acupuncture, very little sleep the night before                                                         | unlikely  | 1 |
| - Hypertensive crisis                                                                          | possible       | 1  | - Skin rash and feeling ill for several weeks accompanied by decrease of ME symptoms and feeling of catharsis (no treatment) | possible  | 1 |
| - Syncope (vasovagal reaction)                                                                 | possible       | 2  |                                                                                                                              |           |   |
| - Asthma attack in a patient with asthma                                                       | possible       | 1  |                                                                                                                              |           |   |
| - Erysipelas (one in a patient with lymphedema)                                                | possible       | 2  |                                                                                                                              |           |   |
| - Circulatory collapse (one with uncontrolled defecation and one with vertigo and paresthesia) | possible       | 2  |                                                                                                                              |           |   |
| - Circulatory reaction with amnesia                                                            | unlikely       | 1  |                                                                                                                              |           |   |
| - Tonic-clonic seizures and ophistotonus                                                       | unlikely       | 1  |                                                                                                                              |           |   |
| - Infection of the knee joint with E. coli bacteria                                            | possible       | 1  |                                                                                                                              |           |   |

Table 3: Causality assessment of serious adverse events as reported in included articles

The total number of serious adverse events (SAE) as well as the total number of treatments in each study can be identified from figure 3.

#### Acupuncture related adverse events requiring treatment

Meta-analysis combining eight studies including 1,211,791 patients yielded a summary estimate of 1.14 (95%-CI 0.00 to 7.37) in 1000 patients for the risk to suffer from an AE that required treatment when undergoing an acupuncture series (Figure 4). (29, 30, 34, 39, 44, 45, 47, 48) Also here, heterogeneity was substantial ( $I^2$  100%). Two articles, that had defined required treatment as an SAE criterion, reported lower incidences (2 and 6 events per 100,000 patients) (39, 44) than other two articles, reporting on AE requiring treatment without referring to SAE (1.7 and 2.2 in 100 patients). (29, 47)

#### Risk of different types of minor adverse events

Overall risk for the different types of minor AE (categorization see online supplementary appendix S3) were estimated in separated meta-analyses as patients with AE per total number of patients undergoing a treatment series or as treatments with AE per total number of treatments (Table 4). Risks estimated in single studies (online supplementary appendix S5 and S6) varied largely for all types of minor AE. Most frequent and commonly occurring minor AE with summary risk estimated between one and five percent of patients undergoing an acupuncture series were bleeding events, pain at the needling site, other local AE, vegetative reactions, aggravation of symptoms, and events related to the central nervous system. Summary risk estimates for bleeding events, needle site pain, vegetative reactions, and aggravation of symptoms also ranged from 1% to 5% of treatments, while meta-analysis of symptoms related to the central nervous system per acupuncture treatment resulted in a risk of two in 1000 treatments. AE estimated to be uncommon with summary risk estimates of one to seven out of 1000 patients undergoing an acupuncture series were symptoms of the peripheral nervous system, pain distant to the needling site, gastrointestinal or gynaecological symptoms, headache, cardiovascular symptoms, affection of the motor system, generalized skin reactions, adverse emotional reactions, and sleeping problems. Symptoms affecting the peripheral nervous system, distant pain, as well as gastrointestinal or gynaecological symptoms were estimated to occur in one to seven out of 1000 treatments;

1 headache, cardiovascular, and motor symptoms as well as adverse emotional reactions only in one to eight out of  
2 10,000 treatments. The risk for respiratory AE was estimated to be rare with a summary risk estimate of four out of  
3 10,000 patients undergoing an acupuncture series and three out of 10,000 treatments. Summary risk estimates for AE  
4 caused by therapists' malpractice and burns caused by moxibustion were between one and two in 1000 patients  
5 undergoing an acupuncture series and between two in 10,000 to one in 1000 treatments, respectively.  
6

7 Some of the studies showed outlying incidences for particular types of minor AE. List et al. observed at least one  
8 vegetative reaction in the course of an acupuncture series for craniomandibular disorder in over half of the patients  
9 (58.6%),<sup>(35)</sup> and MacPherson et al. reported vegetative reactions after over a quarter of treatments (27.9%).<sup>(37)</sup>  
10 These findings exceed the frequency of vegetative reactions of up to 13.6% of patients identified in the remaining  
11 studies and was mainly based on patient reports of abnormal tiredness after treatment. List et al. also report the  
12 highest incidence of aggravation of symptoms with 93% of CMD patients as well as the highest frequency of needle  
13 site pain with 44.8 % of patients. This was followed by an RCT with 32.2% of patients suffering needle site pain (29)  
14 and a cohort study among chronic pain patients of which 10% suffered aggravation of symptoms after receiving  
15 acupuncture.<sup>(40)</sup> The remaining 19 articles reported incidences smaller than 3% for aggravation of symptoms and 14%  
16 for needle site pain.  
17  
18  
19  
20  
21  
22  
23  
24  
25  
26  
27  
28  
29  
30  
31  
32  
33  
34  
35  
36  
37  
38  
39  
40  
41  
42  
43  
44  
45  
46  
47  
48  
49  
50  
51  
52  
53  
54  
55  
56  
57  
58  
59  
60

| Type of AE                               | Number of studies | Sum of patients | Risk as patients with AE per 100 patients [95%-CI] |                      |                         | Tau <sup>2</sup><br>I <sup>2</sup> | Number of studies | Sum of treatments | Risk as treatments with AE per 100 treatments [95%-CI] |                      |                         | Tau <sup>2</sup><br>I <sup>2</sup> |
|------------------------------------------|-------------------|-----------------|----------------------------------------------------|----------------------|-------------------------|------------------------------------|-------------------|-------------------|--------------------------------------------------------|----------------------|-------------------------|------------------------------------|
|                                          |                   |                 | overall                                            | min                  | max                     |                                    |                   |                   | overall                                                | min                  | max                     |                                    |
| Bleeding                                 | 13                | 1038741         | 4.67<br>[2.08; 8.22]                               | 0.48<br>[0.32; 0.67] | 25.18<br>[21.10; 29.50] | 0.0008<br>99.4%**                  | 13                | 190661            | 4.92<br>[1.18; 11.01]                                  | 0.03<br>[0.02; 0.05] | 45.45<br>[42.89; 48.03] | 0.0169<br>99.9%**                  |
| Needle site pain                         | 14                | 1038907         | 3.75<br>[0.74; 8.94]                               | 0.05<br>[0.04; 0.06] | 44.83<br>[27.46; 62.87] | 0.0085<br>99.9%**                  | 12                | 188661            | 2.43<br>[0.63; 5.35]                                   | 0.01<br>[0.00; 0.02] | 15.75<br>[13.92; 17.68] | 0.0095<br>99.8%**                  |
| Other local AE                           | 10                | 1034610         | 2.79<br>[0.02; 10.01]                              | 0.15<br>[0.14; 0.16] | 35.59<br>[23.97; 48.14] | 0.0494<br>100.0%*<br>*             | 11                | 187566            | 0.13<br>[0.04; 0.27]                                   | 0.00<br>[0.00; 0.01] | 0.90<br>[0.48; 1.46]    | 0.0004<br>96.4%**                  |
| Vegetative reaction                      | 12                | 1036607         | 1.95<br>[0.40; 4.63]                               | 0.08<br>[0.07; 0.08] | 58.62<br>[40.52; 75.59] | 0.0012<br>99.7%**                  | 12                | 188661            | 2.24<br>[0.21; 6.35]                                   | 0.00<br>[0.00; 0.01] | 27.87<br>[26.97; 28.78] | 0.0213<br>99.9%**                  |
| Aggravation of symptoms                  | 11                | 1036760         | 1.48<br>[0.00; 5.90]                               | 0.08<br>[0.07; 0.09] | 93.10<br>[81.26; 99.30] | 0.0017<br>99.8%**                  | 10                | 173682            | 0.84<br>[0.26; 1.75]                                   | 0.00<br>[0.00; 0.01] | 2.83<br>[2.66; 3.01]    | 0.0055<br>99.7%**                  |
| Central nervous system                   | 9                 | 244553          | 1.45<br>[0.07; 4.51]                               | 0.05<br>[0.00; 0.20] | 37.93<br>[21.45; 55.99] | 0.0018<br>96.3%**                  | 11                | 179253            | 0.20<br>[0.05; 0.46]                                   | 0.01<br>[0.00; 0.02] | 1.08<br>[0.76; 1.44]    | 0.0011<br>98.4%**                  |
| Peripheral nervous system                | 8                 | 433118          | 0.69<br>[0.02; 2.34]                               | 0.08<br>[0.07; 0.10] | 27.59<br>[13.14; 44.96] | 0.0004<br>98.1%**                  | 10                | 152813            | 0.19<br>[0.02; 0.55]                                   | 0.00<br>[0.00; 0.01] | 1.46<br>[0.84; 2.26]    | 0.0008<br>98.0%**                  |
| Distant pain                             | 5                 | 241817          | 0.60<br>[0.21; 1.20]                               | 0.17<br>[0.09; 0.29] | 0.95<br>[0.72; 1.21]    | 0.0005<br>92.6%**                  | 4                 | 46456             | 0.73<br>[0.00; 5.02]                                   | 0.07<br>[0.00; 0.27] | 4.49<br>[4.08; 4.91]    | 0.0085<br>99.5%**                  |
| Gastrointestinal / gynaecological system | 9                 | 747559          | 0.60<br>[0.04; 1.81]                               | 0.01<br>[0.01; 0.02] | 17.24<br>[5.94; 32.83]  | 0.0008<br>99.3%**                  | 10                | 186125            | 0.15<br>[0.03; 0.38]                                   | 0.01<br>[0.00; 0.02] | 1.18<br>[0.97; 1.41]    | 0.0008<br>98.2%**                  |
| Unclassified AE                          | 10                | 1036307         | 0.57<br>[0.01; 1.95]                               | 0.07<br>[0.05; 0.08] | 17.85<br>[14.29; 21.70] | 0.0003<br>99.0%**                  | 9                 | 172136            | 0.47<br>[0.03; 1.46]                                   | 0.00<br>[0.00; 0.01] | 5.46<br>[4.74; 6.23]    | 0.0025<br>99.4%**                  |
| Headache                                 | 9                 | 845745          | 0.51<br>[0.03; 1.55]                               | 0.03<br>[0.03; 0.04] | 13.56<br>[6.10; 23.38]  | 0.0012<br>99.6%**                  | 7                 | 97592             | 0.04<br>[0.01; 0.10]                                   | 0.00<br>[0.00; 0.01] | 1.14<br>[0.01; 0.40]    | 0.0002<br>90.3%**                  |
| Cardiovascular system                    | 5                 | 739155          | 0.40<br>[0.24; 0.61]                               | 0.27<br>[0.25; 0.29] | 0.83<br>[0.00; 3.21]    | 0.0001<br>96.4%**                  | 3                 | 18774             | 0.03<br>[0.00; 0.13]                                   | 0.01<br>[0.00; 0.04] | 0.08<br>[0.00; 0.33]    | 0.0001<br>21.2%                    |
| Motor system                             | 5                 | 237634          | 0.38<br>[0.00; 4.79]                               | 0.08<br>[0.07; 0.09] | 41.38<br>[24.41; 59.48] | 0.0011<br>94.6%**                  | 5                 | 82112             | 0.01<br>[0.00; 0.04]                                   | 0.00<br>[0.00; 0.01] | 0.03<br>[0.00; 0.11]    | 0.0001<br>58.1%*                   |
| Generalized skin reaction                | 2                 | 229289          | 0.35<br>[0.00; 35.67]                              | 0.09<br>[0.08; 0.10] | 1.69<br>[0.00; 6.52]    | 0.0029<br>58.2%                    | -                 | -                 | -                                                      | -                    | -                       | -                                  |
| Needling malpractice                     | 7                 | 1029871         | 0.22<br>[0.01; 0.67]                               | 0.00<br>[0.00; 0.00] | 1.04<br>[0.81; 1.30]    | 0.0009<br>99.7%**                  | 7                 | 164146            | 0.12<br>[0.02; 0.28]                                   | 0.01<br>[0.00; 0.02] | 0.62<br>[0.28; 1.10]    | 0.0002<br>95.1%**                  |
| Emotional interference                   | 6                 | 930429          | 0.20<br>[0.00; 0.81]                               | 0.02<br>[0.02; 0.02] | 1.24<br>[0.99; 1.53]    | 0.0002<br>98.7%**                  | 7                 | 155131            | 0.08<br>[0.00; 0.27]                                   | 0.01<br>[0.00; 0.02] | 0.67<br>[0.51; 0.84]    | 0.0004<br>96.8%**                  |
| Sleeping problems                        | 5                 | 432529          | 0.16<br>[0.00; 0.91]                               | 0.04<br>[0.03; 0.05] | 20.69<br>[8.19; 37.03]  | 0.0001<br>97.1%**                  | -                 | -                 | -                                                      | -                    | -                       | -                                  |
| AE caused by moxibustion                 | 4                 | 428682          | 0.14<br>[0.00; 1.16]                               | 0.00<br>[0.00; 0.00] | 0.96<br>[0.60; 1.42]    | 0.0002<br>98.3%**                  | 4                 | 145750            | 0.02<br>[0.00; 0.18]                                   | 0.00<br>[0.00; 0.01] | 0.17<br>[0.11; 0.25]    | 0.0001<br>95.0%**                  |
| Respiratory system                       | 3                 | 235637          | 0.04<br>[0.00; 0.26]                               | 0.02<br>[0.01; 0.02] | 0.24<br>[0.00; 0.96]    | 0.0001<br>69.0%*                   | 1                 | 3535              | 0.03<br>[0.00; 0.11]                                   | -                    | -                       | -                                  |

Table 4: Summary risk estimated for different types of adverse events

Summary risk estimates of adverse events (AE) derived from random effects meta-analyses; min: minimum; max: maximum; 95%-CI: 95% confidence interval \*: p-value of Q-test for heterogeneity < 0.05; \*\*: p-value of Q-test < 0.00

## Risk of bias assessment

According to the inclusion criteria the study objective was clearly described in all articles (Figure 5, category A). Study design was clear for all but one article, which stated that data were collected in the course of 11 clinical trials without further specification.<sup>(34)</sup> Also, all but one AE assessment were free of a run in period. In one RCT the safety assessment was initiated with a short delay.<sup>(35)</sup> Both irregularities were rated as unlikely to introduce bias into AE documentation. High risk for selection bias (Figure 5, category B) was identified for the four RCTs and the AE assessment in 11 clinical trials (23% of articles), due to exclusion of patients with comorbidities or bleeding tendency. In contrast, in all surveys and cohort studies (77%) the risk for selection bias was rated as unclear due to an indistinct selection of therapists and / or patients, inclusion of voluntarily participating acupuncturists or acupuncturists from specialized medical centres only. Furthermore, none of the articles stated that patients were naive to acupuncture. Risk of bias due to study withdrawal or drop-out (Figure 5, category C) was rated as low for all RCTs and two surveys, that only reported on short-term AE (27%),<sup>(37, 43)</sup> and as high for one survey (5%), because treatment was ceased for 40% of patients with AE.<sup>(42)</sup> For the remaining studies (68%) the risk of bias due to early treatment termination was rated as unclear, as withdrawals and drop-outs due to AE were not reported. The risk of information bias regarding the safety outcome (Figure 5, category D) was rated as high for one study (5%) because of an exclusive documentation of repeatedly occurring AE (35) and as unclear for all remaining studies (95%). At this, AE reporting by patients or acupuncturists instead of an independent assessor was classified as an unclear risk for social desirability bias. Using only a selection list (33, 34, 37, 42) or only open questions as AE assessment tool,<sup>(47-49)</sup> lack of reporting on the AE assessment tool (41, 43, 45) or the definition of the safety outcome, and selection of the time-point of the AE assessment (only directly after treatment,<sup>(30, 31, 41, 45)</sup> only after the last treatment initiation,<sup>(35, 36, 39, 44, 47)</sup> solely upon recognition (38, 42, 46, 49)) were rated as possible but unclear sources of detection bias. Further risk of information bias (Figure 5, category E) appeared to be unclear due to poor reporting of treatment details in all but seven studies (32%).<sup>(29, 35, 38, 39, 45, 48, 50)</sup> Bias arising from differential care, confounder assessment and statistical methods to control for confounding (Figure 5, category F) was rated as low, as crude AE risk estimates and not relative risks with respect to a comparator group were extracted. The risk of bias due to other statistical methods (Figure 5, category G) was also rated as low, as reporting of AE incidence was clear and well-structured in all articles.

Bias due to conflict of interest (Figure 5, category H) might be present in four articles (18%) due to funding by institution with direct interest in the public acknowledgement of acupuncture.<sup>(36, 37, 41, 42)</sup> In eight articles (36%) funding or other conflicts of interest were not described.<sup>(32, 34, 35, 38, 40, 46, 48, 49)</sup> The ten remaining articles (45%) included an explicit statement about funding by independent institutions and absence of other conflicts of interest.

## **Discussion**

### Overall risk for acupuncture related adverse events

To date this is the first systematic review on prospective studies that provides summary risk estimates for acupuncture related adverse events derived from meta-analyses. The obtained results suggest that AE can be expected in every tenth patient that undergoes a series of acupuncture treatments and, overall, in every 13<sup>th</sup> treatment. Minor AE were common and represented the large majority of reported AE. About half of the reported minor AE are usually mild and transient or might even be regarded as part of the acupuncture treatment or therapeutically intended reactions (bleeding, needle site pain, flare around the needle site).<sup>(21)</sup> SAE can be expected rarely in about every 10,000<sup>th</sup> patient in the course of an acupuncture series and, overall, in every 125,000<sup>th</sup> treatment. Sensitivity analyses excluding studies with zero SAE incidences still suggest SAE being rare (every 7000<sup>th</sup> patient and every 60,000<sup>th</sup> treatment)

1 particularly in comparison to SAE risk associated with pharmacological treatments.(16, 51, 52) AE requiring treatment  
2 occur uncommonly in about every 900<sup>th</sup> treatment, but additional AE are likely to also have involved medical decision-  
3 making about further diagnostics and follow-up. With meta-analyses for the overall risk of acupuncture related AE  
4 covering over 845,637 patients undergoing more than 7.4 million treatments and for the risk of SAE covering more  
5 than 1.2 million patients and 10.6 million treatments, the amount of data is equivalent to such available on the safety  
6 of e.g. common analgesics.(53, 54) This work augments insights on acupuncture related adverse events from previous  
7 reviews with either narrow eligibility criteria or focussing on case reports.(17) It includes data from the largest and  
8 most rigorous trials on acupuncture safety e.g. from the large nationwide cohort studies conducted in the UK and  
9 Germany which had not yet been aggregated.(31, 36-39, 44, 46, 47) Thus, our results provide rigorous support for the  
10 previously drawn conclusion (22, 55, 56) that acupuncture is among the safe treatments in medicine with SAE occurring  
11 rarely and half of the common minor AE being mild and transient. The uncommon AE requiring treatment necessitate  
12 solid medical competence of acupuncturists.

### 13 Types of adverse events related to acupuncture and implications for medical education of acupuncturists

14 Common minor AE were bleeding, needle site pain, other local reactions at the needling site, vegetative reactions,  
15 aggravation of symptoms, and AE related to the central nervous system (one to five out of 100 patients). This is in line  
16 with other reviews (22, 57) also on auricular (58) and paediatric acupuncture.(56) All other types of minor AE can be  
17 regarded as uncommon (1 to 7 out of 1000 patients), despite respiratory reactions that occurred very rarely (4 out of  
18 10,000 patients). SAE most often reported were pneumothorax, strong cardiovascular or vasovagal reactions, and fall  
19 or trauma with one to three cases in one million treatments. Several other sometimes fatal SAE repeatedly described  
20 in case reports were not observed in the included studies; e.g. traumatic injuries of inner organs, local and systemic  
21 infections, subarachnoid bleeding, infective endocarditis, and cardiac tamponade.(59-63) This is likely due to the fact  
22 that acupuncturists in most of the studies were well trained, as SAE are claimed to be avoidable by proper acupuncture  
23 training and practice. Concordantly, cases of acupuncture malpractice were uncommon in the included trials.

### 24 Heterogeneity between studies

25 Possible causes of the substantial heterogeneity observed in all meta-analyses are differences in patient populations,  
26 needling regimens, AE definition, and AE assessment. Sensitivity analyses of trials reporting on adverse reactions with  
27 a plausible relationship to acupuncture resulted in only marginally lower overall AE risk estimates, but in a 50% lower  
28 SAE risk per patient and a 30% lower SAE risk per treatment. Reporting of SAE irrespective of the relationship to  
29 acupuncture is surely more conservative but likely to cause risk overestimation. In line with this, the causality of more  
30 than half of the SAE was rated as unlikely or unclassifiable by two independent acupuncture experts.

31 The variety of combinations of further patient treatment and assessment related factors prevented meaningful  
32 subgrouping of studies for additional sensitivity analyses, and the likeliness of their contribution to the observed  
33 heterogeneity makes formal assessment for publication bias unadvisable.(64) However, some distinct observations  
34 are worth to be discussed. Certain patient populations might be at higher risk to experience acupuncture related AE;  
35 e.g. in one study conducted among CMD patients AE were prominently frequent.(35) The role of acupuncture regimens  
36 in explaining heterogeneity could not be determined due to the limited information about number, location, and  
37 stimulation of needles. In contrast, the number of treatments per acupuncture series and study type seemed not to  
38 have impacted reported AE incidences.

39 A further possible cause of heterogeneity are differences in contrasting AE from therapeutically intended reactions  
40 that form part of acupuncture treatment; e.g. in contrast to international consensus, (18) aggravated symptoms were  
41 not or only in part counted as AE in two studies. (30, 46) Local reactions such as bleeding, pain, and flare at the needling  
42



1 site that represented half of the AE reported and are referred to as beneficial signs in standard acupuncture textbooks  
2 and by authors themselves.(20, 31) As the principle of acupuncture is to induce endogenous anti-nociceptive  
3 mechanisms and anti-inflammatory humoral responses through micro-trauma of skin and tissue, it can be argued that  
4 moderate local reactions are indeed desired reactions indicating an induction of regulative processes. Mild pain and a  
5 flare at the needling site have been linked to important neurophysiological mechanisms of acupuncture.(21)  
6 Additionally, aching or soreness at the needling site might be part of the intended deqi sensation (propagated  
7 sensation along the channels) supposedly related to acupuncture effectiveness.(19) The loss of small drops of blood  
8 upon needle withdrawal is interpreted as a sign for the patient's constitution called "excess" or "excess heat" in TCM  
9 terminology and was suggested not to be interpreted as AE.(65) On the other hand, standard text books explicitly  
10 explain needling techniques avoiding pain and bleeding.(20, 66) This debate calls for a uniform internationally  
11 recognized consensus on the definition of local acupuncture reactions as AE e.g. according to their quality and  
12 intensity.  
13

14 In addition, included studies differed in reporters (acupuncturists, patients, acupuncturists also questioning patients,  
15 and independent assessors), the type of documentation (selection list, open questions, or a combination of both), and  
16 assessment time points. Due to the large variability of combinations the individual impact of these factors could not  
17 be estimated, but literature suggests that patients report more AE than therapists,(67) and that open questions  
18 presented to patients lead to lower risk estimates than the presentation of a selection list of possible AE.(29) Thus,  
19 standardized AE assessment methods should be established for acupuncture studies.  
20

### 21 Risk of bias in included studies

22 Although, large prospective studies are among the most important sources of safety data, they come with the known  
23 risk for information, selection, and confounding bias.(68) Risk of information bias was mostly related to poor reporting  
24 of acupuncture regimens and the discrepancies in AE definition and assessment. This is in line with the shortcoming  
25 identified for reporting of AE in acupuncture randomized controlled trials.(69) Possible causes of selection bias  
26 identified were mainly voluntary participation of practitioners, unsystematic patient selection, and study conductance  
27 in highly specialized institutions. Practical reasons make these causes of selection bias inherent to safety studies. They,  
28 however, are unlikely to importantly impair external validity, considering the large number of patients and treatments,  
29 the variety of countries in which studies were conducted, and the inclusion of different study designs. Future large  
30 scale comparative safety studies along with modern statistical methods for confounder adjustment could be used to  
31 contrast AE risks related acupuncture to AE risks associated with other treatments and to identify patient and  
32 treatment characteristics associated with AE in real world clinical settings.(70)  
33

### 34 Limitations

35 First, it is debatable whether studies should be summarized irrespective of whether AE not necessarily related to  
36 acupuncture or adverse reactions likely caused by acupuncture were reported. In order to provide the most  
37 comprehensive information possible respective sensitivity analyses were conducted. Additionally, the risk estimates  
38 for the different types of minor adverse events are likely to be slightly overestimated and should be interpreted as a  
39 rough indication that allows to distinguish frequent from less frequent acupuncture related minor AE. In categorizing  
40 the minor AE it was disregarded that several different AE falling in one category could have occurred in the same  
41 patient or during the same treatment. Also, calculations of risks in treatments with AE per total number of treatments  
42 could not adjust for the fact that multiple AE assessments in the same patient are not independent. Furthermore, zero  
43 incidences of certain types of AE were not available. Finally, the causality assessment presented for SAE is limited to  
44

1 expert opinions and is only based on the information provided in the respective article. Such an evaluation does not  
2 replace a rigorous causality assessment that would involve querying patients and therapists.

### 3 Clinical implications

4 Patients should be informed that acupuncture commonly causes minor AE, but rarely SAE. Examples for SAE should at  
5 least cover the most frequent ones, pneumothorax and strong cardiovascular or vasovagal reactions potentially  
6 leading to fall or trauma, along with the respective incidence of 1-3 per million treatments. Patients should also be  
7 made aware of the fact that great part of the minor AE are either very mild or even intended effects that indicate a  
8 beneficial physiological reactions. However, they should be encouraged to report any prolonged discomfort or pain  
9 that are to be avoided during treatment. Acupuncturists should carefully balance treatment intensity according to  
10 patients' reactions in order to minimize AE. They should assess local AE upon needle withdrawal and query patients  
11 about AE directly after treatment as well as at the subsequent visit. Therapists should be aware that, although  
12 uncommon, AE requiring treatment can be expected and necessitate medical decision making. Medical competence  
13 is also required for the indication of acupuncture in patients at high risk for AE or those in which AE could lead to  
14 particular aversive outcomes such as pregnant women, elderly and patients with cardiovascular comorbidities. In  
15 these patients acupuncture can be especially beneficial, as conventional treatments e.g. with analgesics are often  
16 limited by side effects or drug interactions, but selection of acupuncture regimens needs to involve careful risk-benefit  
17 considerations. These medical competences required to provide optimal patient safety should also be reflected by  
18 acupuncture education standards and regulations. At this policy makers should take into account the worldwide  
19 popularity of acupuncture which is likely to further increase as its scientific level of evidence has led to more than 4000  
20 practice guidelines recommending acupuncture for different mostly pain indications.(69)

### 21 **Conclusion**

22 Acupuncture can be considered among the safer treatments in medicine. It rarely causes SAE and the majority of the  
23 common minor AE are very mild. AE requiring medical management are uncommon. For optimal patient safety  
24 acupuncture education standards regulations should reflect that solid medical competence of acupuncturists is  
25 required to manage AE properly and to minimize the risk of malpractice. Clinical and methodological heterogeneity  
26 calls for an international consensus on AE assessment tools in acupuncture studies and criteria for differentiating  
27 acupuncture related AE from therapeutically desired reactions as well as identification of patient related risk factors  
28 for acupuncture related AE. In particular, comparative safety studies are needed to contrast acupuncture to standard  
29 care in its main indications.



## Figure legends

### Figure 1: Flow diagram

Designed according to the preferred reporting items for systematic reviews and meta-analyses (PRISMA)(24)

### Figure 2: Meta-analyses of the overall risk for acupuncture related adverse events

Summary risk estimates for adverse events (AE) were calculated as the number of patients or treatments with at least one AE relative to the total number of patients or treatments, respectively.

### Figure 3: Meta-analyses of the overall risk for serious adverse events related to acupuncture

Summary risk estimates for serious adverse events (SAE) were calculated as the number SAE cases relative to the total number of patients or treatments, respectively.

### Figure 4: Meta-analyses of the overall risk for adverse events (AE) requiring treatment

Summary risk estimates for AE requiring treatment were calculated as the number of patients with such AE relative to the total number of patients.

### Figure 5: Risk of bias assessment

Risk of bias assessment was conducted according to Faillie et al.(27) L – green: low risk of bias, U – yellow: unclear risk of bias, H – red: high risk of bias

## Acknowledgements

We thank Mrs. Luise Möhring and Dr. Barbara Jopen-Wolff from the Multidisciplinary Pain Center, Department for Anaesthesiology, University Hospital LMU Munich. Mrs. Möhring assisted in article screening and Mrs. Dr. Jopen-Wolff participated in the causality assessment. The contribution of Mrs. Wenyue Zhang during the planning phase was made possible by the support of the China Scholarship Council (CSC) of the LMU Munich.

## Funding

No funding was received for the conduct of this work.

## Competing interests

All authors have completed the ICMJE uniform disclosure form at [www.icmje.org/coi\\_disclosure.pdf](http://www.icmje.org/coi_disclosure.pdf) and declare: no support from any organisation for the submitted work; no financial relationships with any organisations that might have an interest in the submitted work in the previous three years. DI reports to receive honorarium and travel costs from non-profit academic organizations, physician chambers and universities for teaching and lecturing and to serve as president of the German Medical Acupuncture Association (Deutsche Ärztgesellschaft für Akupunktur, DÄGfA, a non-profit medical associations). PB declares to receive honorarium and travel costs from non-profit academic organizations and universities for teaching and lecturing and to be member of the scientific advisory board of the DÄGfA. WZ and TS declare: no other relationships or activities that could appear to have influenced the submitted work.

## Authors' contributions

DI, PB and WZ defined the research question as well as in and exclusion criteria for this systematic review. WZ, TS and PB were responsible for article screening, data extraction and classifications of adverse events. TS and PB performed the quality assessment. Questions and discrepancies were discussed among all authors until consent was achieved. PB conducted the meta-analyses and designed table and figures. All authors contributed to drafting the manuscript and approved its final version for publication.

The corresponding author (PB) attests that all listed authors meet authorship criteria and that no others meeting the criteria have been omitted. As the senior author, DI is the guarantor of the work presented in this manuscript. DI accepts full responsibility for the finished article, has access to any data and controlled the decision to publish

## Transparency declaration

The lead author DI affirms that this manuscript is an honest, accurate, and transparent account of the study being reported; that no important aspects of the study have been omitted; and that the review and analyses were conducted as planned.

## Ethical approval

Not required.

## Data sharing

The full set of extracted data and the R-code underlying the meta-analyses are available from the corresponding and senior author (Petra.Baeumler@med.uni-muenchen.de, Dominik.Irnich@med.uni-muenchen.de).

## Dissemination to participants and related patient and public communities

Authors plan to disseminate the findings of this review to patients, clinicians, policy makers and the general public through various channels including newsletters, newspapers and magazines. In special regard to patient information, results will be shared during patient seminars and information events, and a concise version of the results will be made available for non-profit acupuncture organisations to be presented on their webpages.

## Trial registration

PROSPERO registration number CRD42020151930. To enable PROSPERO to focus on COVID-19 registrations during the 2020 pandemic, this registration record was automatically published exactly as submitted. It has not been checked for eligibility or for sense by the PROSPERO team.

For peer review only

## References

1. Ammon K, Cardini F, Daig U, Dragan S, Frei-Erb M, Hegyi G, et al. Final Report of CAMbrella Work Package 5 - Helath Technology Assessment (HTA) and a map of CAM provision in the EU [Internet]. CAMbrella - A pan-European research network for Complementary and Alternative Medicine (CAM); 2013 [updated 17.09.2013]. 14]. Available from: <https://phaidra.univie.ac.at/view/o:300096>.
2. British Acupuncture Council. Acupuncture practitioners in the UK [Internet]. 2016 [updated 2016]. Available from: <https://www.acupuncture.org.uk/public-content/about-the-bacc/4115-acupuncture-practitioners-in-the-uk.html>.
3. Cui J, Wang S, Ren J, Zhang J, Jing J. Use of acupuncture in the USA: changes over a decade (2002-2012). *Acupuncture in medicine : journal of the British Medical Acupuncture Society*. 2017;35(3):200-7.
4. Vickers AJ, Vertosick EA, Lewith G, MacPherson H, Foster NE, Sherman KJ, et al. Acupuncture for Chronic Pain: Update of an Individual Patient Data Meta-Analysis. *J Pain*. 2018;19(5):455-74.
5. Linde K, Allais G, Brinkhaus B, Fei Y, Mehring M, Vertosick EA, et al. Acupuncture for the prevention of episodic migraine. *Cochrane Database Syst Rev*. 2016(6):Cd001218.
6. Linde K, Allais G, Brinkhaus B, Fei Y, Mehring M, Shin BC, et al. Acupuncture for the prevention of tension-type headache. *Cochrane Database Syst Rev*. 2016;4:Cd007587.
7. Tedesco D, Gori D, Desai KR, Asch S, Carroll IR, Curtin C, et al. Drug-Free Interventions to Reduce Pain or Opioid Consumption After Total Knee Arthroplasty: A Systematic Review and Meta-analysis. *JAMA surgery*. 2017;152(10):e172872.
8. Sun Y, Gan TJ, Dubose JW, Habib AS. Acupuncture and related techniques for postoperative pain: a systematic review of randomized controlled trials. *British journal of anaesthesia*. 2008;101(2):151-60.
9. Lee A, Chan SK, Fan LT. Stimulation of the wrist acupuncture point PC6 for preventing postoperative nausea and vomiting. *Cochrane Database Syst Rev*. 2015(11):Cd003281.
10. Feng S, Han M, Fan Y, Yang G, Liao Z, Liao W, et al. Acupuncture for the treatment of allergic rhinitis: a systematic review and meta-analysis. *American journal of rhinology & allergy*. 2015;29(1):57-62.
11. Yang A, Wu HM, Tang JL, Xu L, Yang M, Liu GJ. Acupuncture for stroke rehabilitation. *Cochrane Database Syst Rev*. 2016(8):Cd004131.
12. Smith CA, Armour M, Lee MS, Wang LQ, Hay PJ. Acupuncture for depression. *Cochrane Database Syst Rev*. 2018;3:Cd004046.
13. Hershman DL, Unger JM, Greenlee H, Capodice JL, Lew DL, Darke AK, et al. Effect of Acupuncture vs Sham Acupuncture or Waitlist Control on Joint Pain Related to Aromatase Inhibitors Among Women With Early-Stage Breast Cancer: A Randomized Clinical Trial. *JAMA*. 2018;320(2):167-76.
14. Brinkhaus B, Roll S, Jena S, Icke K, Adam D, Binting S, et al. Acupuncture in Patients with Allergic Asthma: A Randomized Pragmatic Trial. *J Altern Complem Med*. 2017;23(4):268-77.
15. Whiskey E, Taylor D. A review of the adverse effects and safety of noradrenergic antidepressants. *Journal of psychopharmacology (Oxford, England)*. 2013;27(8):732-9.
16. Carter GT, Duong V, Ho S, Ngo KC, Greer CL, Weeks DL. Side effects of commonly prescribed analgesic medications. *Physical medicine and rehabilitation clinics of North America*. 2014;25(2):457-70.
17. Chan MWC, Wu XY, Wu JCY, Wong SYS, Chung VCH. Safety of Acupuncture: Overview of Systematic Reviews. *Sci Rep*. 2017;7(1):3369.
18. White A, Boon H, Alraek T, Lewith G, Liu JP, Norheim AJ, et al. Reducing the risk of complementary and alternative medicine (CAM): Challenges and priorities. *Eur J Integr Med*. 2014;6(4):404-8.
19. Ren YL, Guo TP, Du HB, Zheng HB, Ma TT, Fang L, et al. A survey of the practice and perspectives of chinese acupuncturists on deqi. *Evidence-based complementary and alternative medicine : eCAM*. 2015;2015:684708.
20. Shanghai College of Traditional Medicine. *Acupuncture - a comprehensive text*. Seattle, USA: Eastland Press; 1981.
21. Zhu H. Acupoints Initiate the Healing Process. *Medical acupuncture*. 2014;26(5):264-70.
22. Ernst E, White AR. Prospective studies of the safety of acupuncture: a systematic review. *Am J Med*. 2001;110(6):481-5.
23. University of York Y, UK. International prospective register of systematic reviews (PROSPERO) [Internet]. [Available from: <https://www.crd.york.ac.uk/prospero>].
24. Moher D, Liberati A, Tetzlaff J, Altman DG. Preferred reporting items for systematic reviews and meta-analyses: the PRISMA statement. *J Clin Epidemiol*. 2009;62(10):1006-12.

25. European Medicines Agency. Guideline for good clinical practice E6(R2) [Internet]. 2016 [updated 2016]. Available from: [https://www.ema.europa.eu/en/documents/scientific-guideline/ich-e-6-r2-guideline-good-clinical-practice-step-5\\_en.pdf](https://www.ema.europa.eu/en/documents/scientific-guideline/ich-e-6-r2-guideline-good-clinical-practice-step-5_en.pdf).
26. Council for International organizations of medical sciences - CIOMS. Guidelines for Preparing Core Clinical-Safety Information on Drugs Second Edition – Report of CIOMS Working Groups III and V [Internet]. 1999 [updated 1999]. Available from: <https://cioms.ch/shop/product/guidelines-preparing-core-clinical-safety-information-drugs-second-edition-report-cioms-working-groups-iii-v/>.
27. Faillie JL, Ferrer P, Gouverneur A, Driot D, Berkemeyer S, Vidal X, et al. A new risk of bias checklist applicable to randomized trials, observational studies, and systematic reviews was developed and validated to be used for systematic reviews focusing on drug adverse events. *J Clin Epidemiol*. 2017;86:168-75.
28. Schwarzer G. meta: {A}n {R} package for meta-analysis. *R News*. 2007;7(3):40-5.
29. Chung KF, Yeung WF, Yu YM, Kwok CW, Zhang SP, Zhang ZJ. Adverse Events Related to Acupuncture: Development and Testing of a Rating Scale. *Clin J Pain*. 2015;31(10):922-8.
30. da Silva JBG, Saidah R, Megid CBC, Ramos NA. Adverse events following acupuncture: A prospective survey of 13,884 consultations in a university out-patient acupuncture training clinic in Brazil. *Eur J Integr Med*. 2014;6(4):488-91.
31. Endres HG, Molsberger A, Lungenhausen M, Trampisch HJ. An internal standard for verifying the accuracy of serious adverse event reporting: the example of an acupuncture study of 190,924 patients. *Eur J Med Res*. 2004;9(12):545-51.
32. Ernst G, Strzyz H, Hagmeister H. Incidence of adverse effects during acupuncture therapy—a multicentre survey. *Complementary therapies in medicine*. 2003;11(2):93-7.
33. Furuse N, Shinbara H, Uehara A, Sugawara M, Yamazaki T, Hosaka M, et al. A Multicenter Prospective Survey of Adverse Events Associated with Acupuncture and Moxibustion in Japan. *Medical acupuncture*. 2017;29(3):155-62.
34. Leung PC, Zhang L, Cheng KF. Acupuncture: Complications are preventable not adverse events. *Chin J Integr Med*. 2009;15(3):229-32.
35. List T, Helkimo M. Adverse events of acupuncture and occlusal splint therapy in the treatment of craniomandibular disorders. *CRANIO*. 1992;10(4):318-26.
36. MacPherson H, Scullion A, Thomas KJ, Walters S. Patient reports of adverse events associated with acupuncture treatment: A prospective national survey. *Qual Saf Health Care*. 2004;13(5):349-55.
37. MacPherson H, Thomas K. Short term reactions to acupuncture—a cross-sectional survey of patient reports. *Acupuncture in medicine : journal of the British Medical Acupuncture Society*. 2005;23(3):112-20.
38. MacPherson H, Thomas K, Walters S, Fitter M. A prospective of adverse events and treatment reactions following 34,000 consultations with professional acupuncturist. *Acupuncture in medicine : journal of the British Medical Acupuncture Society*. 2001;19(2):93-102.
39. Melchart D, Weidenhammer W, Streng A, Reitmayr S, Hoppe A, Ernst E, et al. Prospective Investigation of Adverse Effects of Acupuncture in 97 733 Patients. *Arch Intern Med*. 2004;164(1):104-5.
40. Melchart DV, Hager S, Weidenhammer W, Liao JZ, Liu Y, Linde K. Adverse effects and concomitant symptoms associated with acupuncture treatment - A pilot study. *Akupunktur*. 1998;26(2):87-92.
41. Odsberg A, Schill U, Haker E. Acupuncture treatment: side effects and complications reported by Swedish physiotherapists. *Complementary therapies in medicine*. 2001;9(1):17-20.
42. Park JE, Lee MS, Choi JY, Kim BY, Choi SM. Adverse events associated with acupuncture: A prospective survey. *J Altern Complem Med*. 2010;16(9):959-63.
43. Park SU, Ko CN, Bae HS, Jung WS, Moon SK, Cho KH, et al. Short-term reactions to acupuncture treatment and adverse events following acupuncture: A cross-sectional survey of patient reports in Korea. *J Altern Complem Med*. 2009;15(12):1275-83.
44. Weidenhammer W, Streng A, Melchart D, Linde K. Unerwünschte Wirkungen und Komplikationen bei Akupunkturbehandlung: Ergebnisse der großen Beobachtungsstudie im Rahmen des Modellvorhabens der Ersatzkassen. *Dtsch Zeitschrift für Akupunkt*. 2008;51(3):6-14.
45. Wen Y, Zhang C, Zhao XF, Deng SZ, He S, Huang LH, et al. Safety of different acupuncture manipulations for posterior circulation ischemia with vertigo. *Neural Regen Res*. 2016;11(8):1267-73.
46. White A, Hayhoe S, Hart A, Ernst E. Survey of adverse events following acupuncture (SAFA): A prospective study of 32,000 consultations. *Acupuncture in medicine : journal of the British Medical Acupuncture Society*. 2001;19(2):84-92.

47. Witt CM, Pach D, Brinkhaus B, Wruck K, Tag B, Mank S, et al. Safety of acupuncture: Results of a prospective observational study with 229,230 patients and introduction of a medical information and consent form. *Forsch Komplementmed*. 2009;16(2):91-7.
48. Yamashita H, Tsukayama H, Hori N, Kimura T, Tanno Y. Incidence of adverse reactions associated with acupuncture. *J Altern Complem Med*. 2000;6(4):345-50.
49. Yamashita H, Tsukayama H, Tanno Y, Nishijo K. Adverse events in acupuncture and moxibustion treatment: A six-year survey at a national Clinic in Japan. *J Altern Complem Med*. 1999;5(3):229-36.
50. Zhao L, Zhang FW, Li Y, Wu X, Zheng H, Cheng LH, et al. Adverse events associated with acupuncture: Three multicentre randomized controlled trials of 1968 cases in China. *Trials*. 2011;12:no pagination.
51. Degner D, Grohmann R, Kropp S, Ruther E, Bender S, Engel RR, et al. Severe adverse drug reactions of antidepressants: results of the German multicenter drug surveillance program AMSP. *Pharmacopsychiatry*. 2004;37 Suppl 1:S39-45.
52. Singh G. Gastrointestinal complications of prescription and over-the-counter nonsteroidal anti-inflammatory drugs: a view from the ARAMIS database. *Arthritis, Rheumatism, and Aging Medical Information System. American journal of therapeutics*. 2000;7(2):115-21.
53. Trelle S, Reichenbach S, Wandel S, Hildebrand P, Tschannen B, Villiger PM, et al. Cardiovascular safety of non-steroidal anti-inflammatory drugs: network meta-analysis. *Bmj*. 2011;342:c7086.
54. Martin Arias LH, Martin Gonzalez A, Sanz Fadrique R, Salgueiro Vazquez E. Gastrointestinal safety of coxibs: systematic review and meta-analysis of observational studies on selective inhibitors of cyclo-oxygenase 2. *Fundamental & clinical pharmacology*. 2018.
55. Wang C, Tan B, Williams A. Safety and side effects of acupuncture therapy in Australia: A systematic review. *Eur J Integr Med*. 2019.
56. Adams D, Cheng F, Jou H, Aung S, Yasui Y, Vohra S. The safety of pediatric acupuncture: a systematic review. *Pediatrics*. 2011;128(6):e1575-87.
57. Wang CC, Tan JY, Williams A. Safety and side effects of acupuncture therapy in Australia: A systematic review. *Eur J Integr Med*. 2019;27:81-9.
58. Tan JY, Molassiotis A, Wang T, Suen LK. Adverse events of auricular therapy: a systematic review. *Evid Based Complement Alternat Med*. 2014;2014:506758.
59. Zhang J, Shang H, Gao X, Ernst E. Acupuncture-related adverse events: a systematic review of the Chinese literature. *Bull World Health Organ*. 2010;88(12):915-21C.
60. Xu S, Wang L, Cooper E, Zhang M, Manheimer E, Berman B, et al. Adverse events of acupuncture: a systematic review of case reports. *Evid Based Complement Alternat Med*. 2013;2013:581203.
61. He W, Zhao X, Li Y, Xi Q, Guo Y. Adverse events following acupuncture: a systematic review of the Chinese literature for the years 1956-2010. *J Altern Complem Med*. 2012;18(10):892-901.
62. Ernst E, Lee MS, Choi TY. Acupuncture: does it alleviate pain and are there serious risks? A review of reviews. *Pain*. 2011;152(4):755-64.
63. Ullah W, Ahmad A, Mukhtar M, Virk HUH, Sarwar U, Figueredo V. Acupuncture-Related Cardiac Complications: A Systematic Review. *J Invasive Cardiol*. 2019;31(4):E69-E72.
64. Lau J, Ioannidis JP, Terrin N, Schmid CH, Olkin I. The case of the misleading funnel plot. *BMJ*. 2006;333(7568):597-600.
65. Zhu HZ. *Running a Safe and Successful Acupuncture Clinic*. Edinburgh, London, New York, Oxford, Philadelphia, St Louis, Sydney, Toronto: Elsevier - Churchill Livingstone; 2006.
66. Deng L, Gan Y, He S, Ji X, Y. L, Wang R, et al. *Chinese Acupuncture and Moxibustion*. 2nd ed. Beijing, China: Foreign Languages Press; 1999.
67. Schwaneberg T, Witt CM, Roll S, Pach D. Comparing physicians' and patients' reporting on adverse reactions in randomized trials on acupuncture-a secondary data analysis. *BMC Complement Alternat Med*. 2019;19(1):223.
68. Suissa S. Statistical methods in pharmacoepidemiology: advances and challenges. *Stat Methods Med Res*. 2009;18(1):3-6.
69. Capili B, Anastasi JK, Geiger JN. Adverse event reporting in acupuncture clinical trials focusing on pain. *Clin J Pain*. 2010;26(1):43-8.
70. Desai RJ, Franklin JM. Alternative approaches for confounding adjustment in observational studies using weighting based on the propensity score: a primer for practitioners. *Bmj*. 2019;367:l5657.



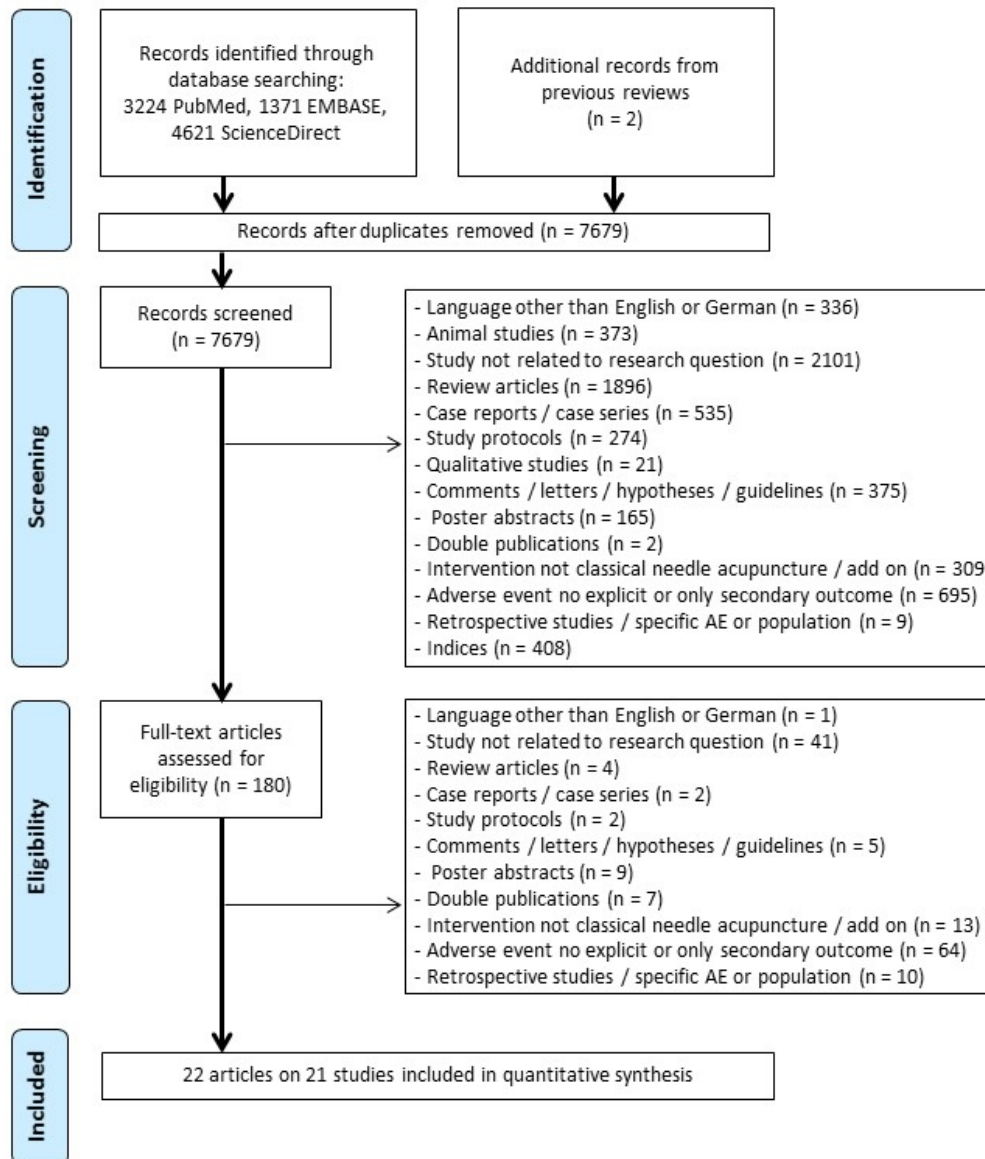

170x200mm (96 x 96 DPI)

**A Overall AE risk among patients undergoing an acupuncture series**

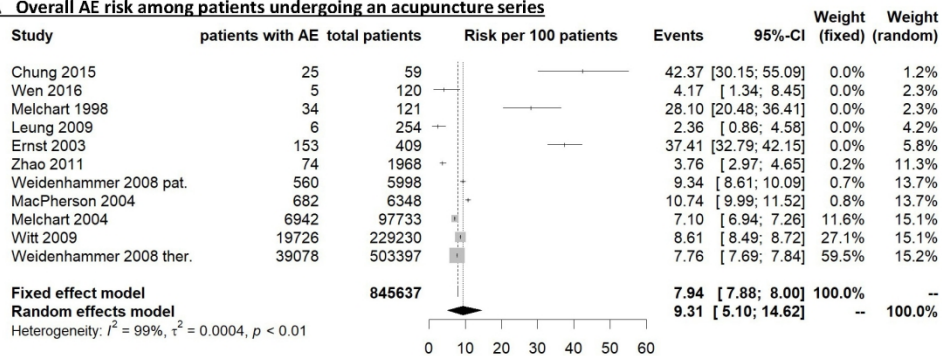

**B Overall AE risk per acupuncture treatment**

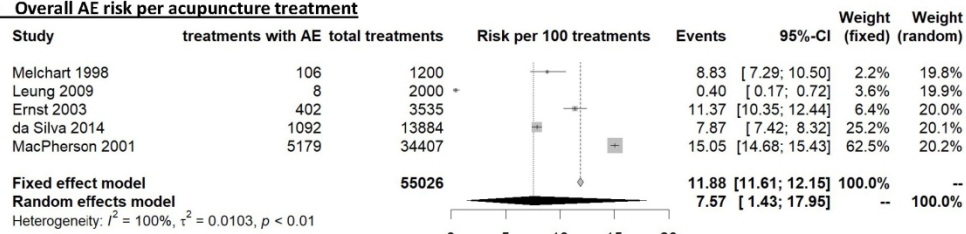

**C Overall risk for AE related to acupuncture among patients undergoing a treatment series**

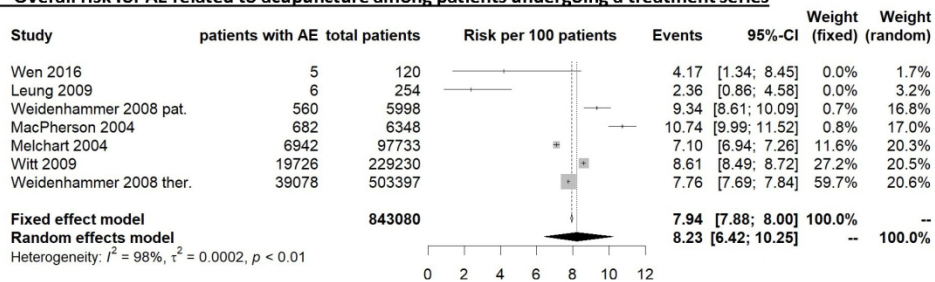

**D Overall risk for AE related to acupuncture per treatment**

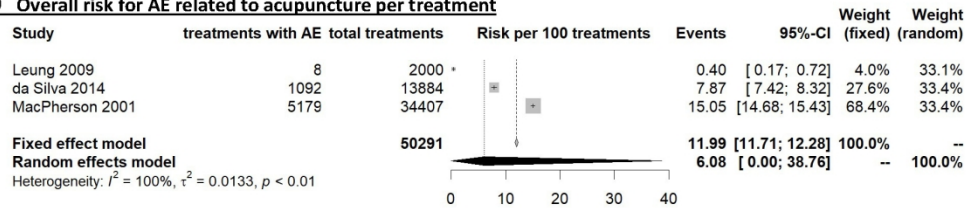

180x210mm (276 x 276 DPI)



**A Overall SAE risk among patients undergoing an acupuncture series**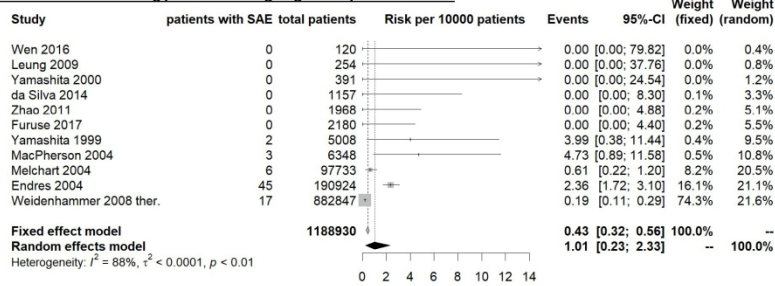**B Overall SAE risk per acupuncture treatment**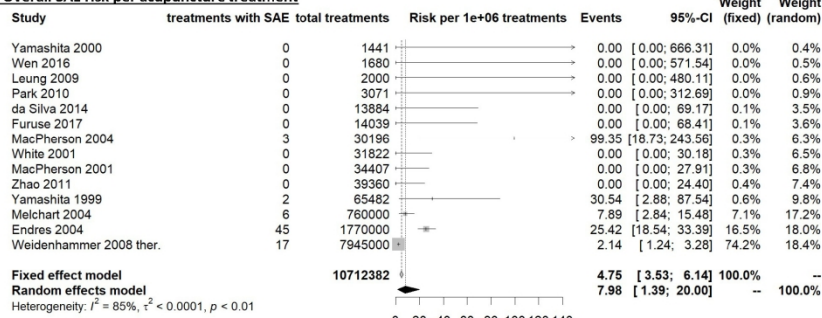**C Overall risk for SAE related to acupuncture among patients undergoing a treatment series**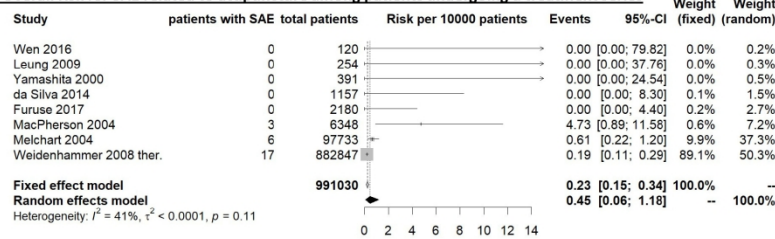**D Overall risk for SAE related to acupuncture per treatment**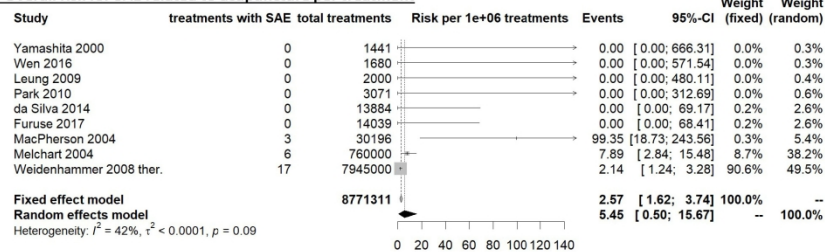

185x257mm (281 x 281 DPI)

1  
2  
3  
4  
5  
6  
7  
8  
9  
10  
11  
12  
13  
14  
15  
16  
17  
18  
19  
20  
21  
22  
23  
24  
25  
26  
27  
28  
29  
30  
31  
32  
33  
34  
35  
36  
37  
38  
39  
40  
41  
42  
43  
44  
45  
46  
47  
48  
49  
50  
51  
52  
53  
54  
55  
56  
57  
58  
59  
60

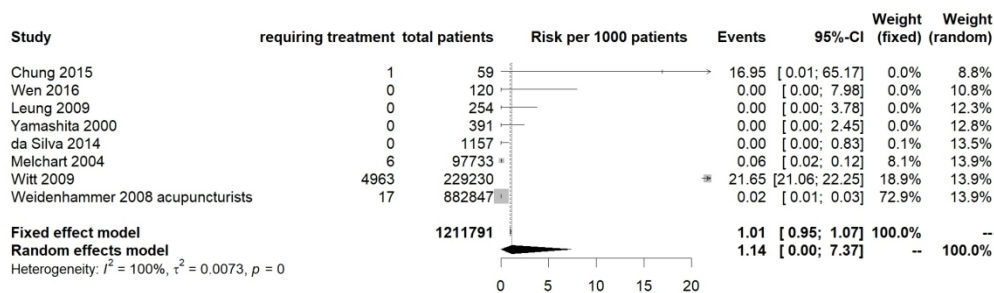

286x82mm (180 x 180 DPI)

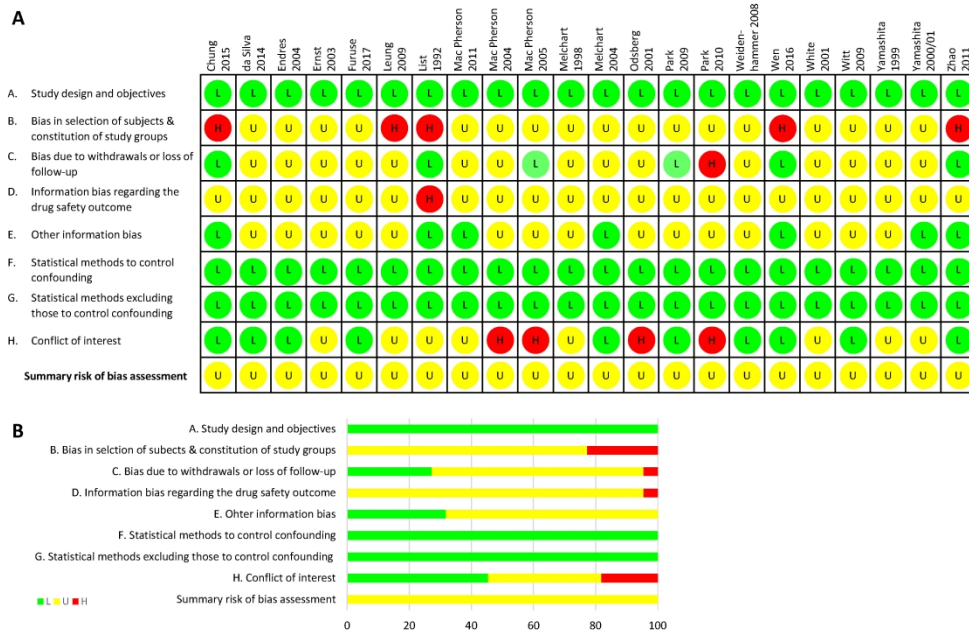

419x297mm (200 x 200 DPI)

**PROSPERO**  
International prospective register of systematic reviews

UNIVERSITY of York  
Centre for Reviews and Dissemination

Systematic review

1. \* Review title.

Give the title of the review in English

Acupuncture related adverse events - a systematic review of prospective clinical trials

2. Original language title.

For reviews in languages other than English, give the title in the original language. This will be displayed with the English language title.

English

3. \* Anticipated or actual start date.

Give the date the systematic review started or is expected to start.

19/09/2019

4. \* Anticipated completion date.

Give the date by which the review is expected to be completed.

31/12/2019

5. \* Stage of review at time of this submission.

Tick the boxes to show which review tasks have been started and which have been completed. Update this field each time any amendments are made to a published record.

**Reviews that have started data extraction (at the time of initial submission) are not eligible for inclusion in PROSPERO.** If there is later evidence that incorrect status and/or completion date has been supplied, the published PROSPERO record will be marked as retracted.

This field uses answers to initial screening questions. It cannot be edited until after registration.

The review has not yet started: No

| Review stage                                                    | Started | Completed |
|-----------------------------------------------------------------|---------|-----------|
| Preliminary searches                                            | Yes     | No        |
| Piloting of the study selection process                         | Yes     | No        |
| Formal screening of search results against eligibility criteria | Yes     | No        |
| Data extraction                                                 | No      | No        |
| Risk of bias (quality) assessment                               | No      | No        |
| Data analysis                                                   | No      | No        |

## PROSPERO

### International prospective register of systematic reviews

Provide any other relevant information about the stage of the review here.

Piloting of the study selection process

Piloting of the study selection process

#### 6. \* Named contact.

The named contact is the guarantor for the accuracy of the information in the register record. This may be any member of the review team.

Dr. Petra Bäumlér

#### Email salutation (e.g. "Dr Smith" or "Joanne") for correspondence:

Petra

#### 7. \* Named contact email.

Give the electronic email address of the named contact.

Petra.Baeumler@med.uni-muenchen.de

#### 8. Named contact address

Give the full institutional/organisational postal address for the named contact.

Dr. Petra Bäumlér

Multidisciplinary Pain Center, Department of Anaesthesiology, University Hospital LMU Munich

Pettenkoférstr. 8a

80336 Munich, Germany

#### 9. Named contact phone number.

Give the telephone number for the named contact, including international dialling code.

0049-89-4400-53625

#### 10. \* Organisational affiliation of the review.

Full title of the organisational affiliations for this review and website address if available. This field may be completed as 'None' if the review is not affiliated to any organisation.

Multidisciplinary Pain Center, Department of Anaesthesiology, University Hospital LMU Munich

#### Organisation web address:

#### 11. \* Review team members and their organisational affiliations.

Give the personal details and the organisational affiliations of each member of the review team. Affiliation refers to groups or organisations to which review team members belong. **NOTE: email and country now MUST be entered for each person, unless you are amending a published record.**

## PROSPERO

### International prospective register of systematic reviews

Dr Petra Baeumler. Multidisciplinary Pain Center, Department of Anaesthesiology, University Hospital LMU Munich

Professor Dominik Irnich. Multidisciplinary Pain Center, Department of Anaesthesiology, University Hospital LMU Munich

Mrs Theresa Stübinger. Multidisciplinary Pain Center, Department of Anaesthesiology, University Hospital LMU Munich

#### 12. \* Funding sources/sponsors.

Details of the individuals, organizations, groups, companies or other legal entities who have funded or sponsored the review.

No funding is received

State the funder(s), grant or award number and the date of award

Grant number(s)

#### 13. \* Conflicts of interest.

List actual or perceived conflicts of interest (financial or academic).

Yes

Petra Bäumlner and Dominik Irnich receive honoraria and travel costs from non-profit academic organizations, physician chamber and universities for teaching and lecturing. Theresa Stübinger declares no conflict of interest

#### 14. Collaborators.

Give the name and affiliation of any individuals or organisations who are working on the review but who are not listed as review team members. **NOTE: email and country must be completed for each person, unless you are amending a published record.**

Dr Wenyue Zhang. School of Acupuncture, Moxibustion and Tuina, Beijing University of Chinese Medicine

#### 15. \* Review question.

State the review question(s) clearly and precisely. It may be appropriate to break very broad questions down into a series of related more specific questions. Questions may be framed or refined using PI(E)COS or similar where relevant.

What is the risk for minor and serious adverse events caused by acupuncture?

What kind of adverse events can be caused by acupuncture?

What is the risk of the different types of acupuncture related adverse events?

#### 16. \* Searches.

State the sources that will be searched (e.g. Medline). Give the search dates, and any restrictions (e.g. language or publication date). Do NOT enter the full search strategy (it may be provided as a link or attachment below.)

Databases: PubMed, Scopus, EMBASE

## PROSPERO

### International prospective register of systematic reviews

Publication period: inception to 15th September 2019

Search Terms: acupuncture, adverse event(s), adverse effect(s)

#### 17. URL to search strategy.

Upload a file with your search strategy, or an example of a search strategy for a specific database, (including the keywords) in pdf or word format. In doing so you are consenting to the file being made publicly accessible. Or provide a URL or link to the strategy. Do NOT provide links to your search **results**.

Alternatively, upload your search strategy to CRD in pdf format. Please note that by doing so you are consenting to the file being made publicly accessible.

Do not make this file publicly available until the review is complete

#### 18. \* Condition or domain being studied.

Give a short description of the disease, condition or healthcare domain being studied in your systematic review.

Acupuncture is the insertion of fine needles at certain points, so called acupuncture points, on the patients body for therapeutic or preventive purposes. Acupuncture originates from ancient Chinese medicine, but is nowadays used worldwide in many different variations. There is level 1 for its effectiveness in acute and chronic pain. Needles are stimulated manually, electrically. Often moxibustion is used as an adjunct. The safety of acupuncture has been debated, and surely needle penetration can cause harms, such as tissue damage, peripheral nerve injury and bleeding. In comparison to analgesic drugs for example, risk and consequences of adverse events are deemed minor, but reviews on the safety of acupuncture are either outdated or lack an assessment of study quality.

#### 19. \* Participants/population.

Specify the participants or populations being studied in the review. The preferred format includes details of both inclusion and exclusion criteria.

Humans treated by needle acupuncture

#### 20. \* Intervention(s), exposure(s).

Give full and clear descriptions or definitions of the interventions or the exposures to be reviewed. The preferred format includes details of both inclusion and exclusion criteria.

Acupuncture involving either manual or electrical needle stimulation with or without moxibustion

#### 21. \* Comparator(s)/control.

Where relevant, give details of the alternatives against which the intervention/exposure will be compared (e.g. another intervention or a non-exposed control group). The preferred format includes details of both inclusion and exclusion criteria.

As the aim of this review is to estimate the crude risk of acupuncture related adverse events, comparator group data are not relevant.

#### 22. \* Types of study to be included.



## PROSPERO

### International prospective register of systematic reviews

Give details of the study designs (e.g. RCT) that are eligible for inclusion in the review. The preferred format includes both inclusion and exclusion criteria. If there are no restrictions on the types of study, this should be stated.

Inclusion criteria:

Prospective study

Primary outcome is the risk of acupuncture related adverse events

Treatment involves acupuncture with needles that are stimulated manually or electrically either in combination with or without moxibustion

Articles published in English or German before 15th of September 2019

Exclusion criteria

Treatment involves injection

Treatment involves skin penetration with any other device than classical acupuncture needles such as press needles, cauterization devices etc.

Treatment is restricted to non-penetrating stimulation such as laser acupuncture, acupressure, transcutaneous electrical nerve stimulation or moxibustion

Treatment is restricted to particular body parts associated with low risk of adverse events such as auricular or one-point acupuncture

### 23. Context.

Give summary details of the setting or other relevant characteristics, which help define the inclusion or exclusion criteria.

### 24. \* Main outcome(s).

Give the pre-specified main (most important) outcomes of the review, including details of how the outcome is defined and measured and when these measurement are made, if these are part of the review inclusion criteria.



## PROSPERO

### International prospective register of systematic reviews

Risk of serious and minor acupuncture related adverse events (AE) as number of AE per treatment and patients with AE per 100.000 patients treated

#### \* Measures of effect

Please specify the effect measure(s) for you main outcome(s) e.g. relative risks, odds ratios, risk difference, and/or 'number needed to treat.

adverse events occurring during or after acupuncture treatment

#### 25. \* Additional outcome(s).

List the pre-specified additional outcomes of the review, with a similar level of detail to that required for main outcomes. Where there are no additional outcomes please state 'None' or 'Not applicable' as appropriate to the review

Type of adverse events caused by acupuncture

Risk of the different types of acupuncture related adverse-events

#### \* Measures of effect

Please specify the effect measure(s) for you additional outcome(s) e.g. relative risks, odds ratios, risk difference, and/or 'number needed to treat.

adverse Events occurring during or after acupuncture treatment

#### 26. \* Data extraction (selection and coding).

Describe how studies will be selected for inclusion. State what data will be extracted or obtained. State how this will be done and recorded.

Incidence of acupuncture related adverse events will be extracted as the number of adverse events per treatment and as number of patients experiencing these adverse events per the total number of patients treated. Data extraction will be performed by two independent reviewers who will extract all available data on acupuncture related adverse events from identified studies. This includes extraction of the total number of and/or patients with minor and serious adverse events as well as extraction of the numbers of and/or patients with all types of adverse events separately in relation to the number of treatments and/or total number of patients treated. The different types of adverse events will be categorized into supersets of adverse events whose risk is calculated separately.

#### 27. \* Risk of bias (quality) assessment.

State which characteristics of the studies will be assessed and/or any formal risk of bias/quality assessment tools that will be used.

Included studies will be assessed for risk of bias according to a checklist developed by Faillie and colleagues for systematic reviews focusing on adverse events.

#### 28. \* Strategy for data synthesis.

Describe the methods you plan to use to synthesise data. This **must not be generic text** but should be **specific to your review** and describe how the proposed approach will be applied to your data. If meta-analysis is planned, describe the models to be used, methods to explore statistical heterogeneity, and software package to be used.

## PROSPERO

### International prospective register of systematic reviews

We will provide the reader with the range (min and max) and the median of the total risk to suffer from an minor and serious adverse event during or after acupuncture treatment that was identified by the studies. The same measures will be provided for the risks of the supersets of adverse events identified from the different studies.

#### 29. \* Analysis of subgroups or subsets.

State any planned investigation of 'subgroups'. Be clear and specific about which type of study or participant will be included in each group or covariate investigated. State the planned analytic approach. It is likely that certain subsets of patients are at a higher risk for acupuncture related adverse events.

According to the obtained results we will provide characteristics and separate summaries of studies including patients with a high and low risk profile.

#### 30. \* Type and method of review.

Select the type of review, review method and health area from the lists below.

##### Type of review

Cost effectiveness

No

Diagnostic

No

Epidemiologic

No

Individual patient data (IPD) meta-analysis

No

Intervention

No

Meta-analysis

No

Methodology

No

Narrative synthesis

No

Network meta-analysis

No

Pre-clinical

No

Prevention

No

Prognostic

No

Prospective meta-analysis (PMA)

No

Review of reviews

## PROSPERO

### International prospective register of systematic reviews

No

Service delivery

No

Synthesis of qualitative studies

No

Systematic review

Yes

Other

No

### Health area of the review

Alcohol/substance misuse/abuse

No

Blood and immune system

No

Cancer

No

Cardiovascular

No

Care of the elderly

No

Child health

No

Complementary therapies

Yes

COVID-19

No

Crime and justice

No

Dental

No

Digestive system

No

Ear, nose and throat

No

Education

No

Endocrine and metabolic disorders

No

Eye disorders

No

General interest

No

Genetics

No

Health inequalities/health equity

No

## PROSPERO

### International prospective register of systematic reviews

1  
2  
3 Infections and infestations

4 No

5 International development

6 No

7  
8 Mental health and behavioural conditions

9 No

10 Musculoskeletal

11 No

12 Neurological

13 No

14 Nursing

15 No

16  
17 Obstetrics and gynaecology

18 No

19 Oral health

20 No

21 Palliative care

22 No

23 Perioperative care

24 No

25 Physiotherapy

26 No

27  
28 Pregnancy and childbirth

29 No

30  
31 Public health (including social determinants of health)

32 No

33 Rehabilitation

34 No

35 Respiratory disorders

36 No

37 Service delivery

38 No

39 Skin disorders

40 No

41 Social care

42 No

43 Surgery

44 No

45 Tropical Medicine

46 No

47 Urological

48 No

49  
50 Wounds, injuries and accidents

51 No

52 Violence and abuse

53 No

54  
55  
56  
57

### 31. Language.

58  
59 Select each language individually to add it to the list below, use the bin icon to remove any added in error.  
60

## PROSPERO

### International prospective register of systematic reviews

English

There is an English language summary.

#### 32. \* Country.

Select the country in which the review is being carried out. For multi-national collaborations select all the countries involved.

Germany

#### 33. Other registration details.

Name any other organisation where the systematic review title or protocol is registered (e.g. Campbell, or The Joanna Briggs Institute) together with any unique identification number assigned by them. If extracted data will be stored and made available through a repository such as the Systematic Review Data Repository (SRDR), details and a link should be included here. If none, leave blank.

The review has not been registered elsewhere.

#### 34. Reference and/or URL for published protocol.

If the protocol for this review is published provide details (authors, title and journal details, preferably in Vancouver format)

Add web link to the published protocol.

Or, upload your published protocol here in pdf format. Note that the upload will be publicly accessible.

No I do not make this file publicly available until the review is complete

Please note that the information required in the PROSPERO registration form must be completed in full even if access to a protocol is given.

#### 35. Dissemination plans.

Do you intend to publish the review on completion?

Yes

Give brief details of plans for communicating review findings.?

A paper presenting the review results will be submitted to a journal listed in MEDLINE. Furthermore, results will be published at international congresses.

#### 36. Keywords.

Give words or phrases that best describe the review. Separate keywords with a semicolon or new line. Keywords help PROSPERO users find your review (keywords do not appear in the public record but are included in searches). Be as specific and precise as possible. Avoid acronyms and abbreviations unless these are in wide use.

acupuncture, adverse-event, adverse-effect, safety, needling, moxibustion, traditional Chinese medicine

#### 37. Details of any existing review of the same topic by the same authors.

If you are registering an update of an existing review give details of the earlier versions and include a full bibliographic reference, if available.

#### 38. \* Current review status.

Update review status when the review is completed and when it is published. New registrations must be ongoing.

Please provide anticipated publication date

**PROSPERO****International prospective register of systematic reviews**

Review\_Ongoing

**39. Any additional information.**

Provide any other information relevant to the registration of this review.

**40. Details of final report/publication(s) or preprints if available.**

Leave empty until publication details are available OR you have a link to a preprint. List authors, title and journal details preferably in Vancouver format.

Give the link to the published review or preprint.

For peer review only

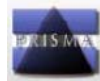

# PRISMA 2009 Checklist

| Section/topic                      | #  | Checklist item                                                                                                                                                                                                                                                                                              | Reported on page # |
|------------------------------------|----|-------------------------------------------------------------------------------------------------------------------------------------------------------------------------------------------------------------------------------------------------------------------------------------------------------------|--------------------|
| <b>TITLE</b>                       |    |                                                                                                                                                                                                                                                                                                             |                    |
| Title                              | 1  | Identify the report as a systematic review, meta-analysis, or both.                                                                                                                                                                                                                                         | 1                  |
| <b>ABSTRACT</b>                    |    |                                                                                                                                                                                                                                                                                                             |                    |
| Structured summary                 | 2  | Provide a structured summary including, as applicable: background; objectives; data sources; study eligibility criteria, participants, and interventions; study appraisal and synthesis methods; results; limitations; conclusions and implications of key findings; systematic review registration number. | 2                  |
| <b>INTRODUCTION</b>                |    |                                                                                                                                                                                                                                                                                                             |                    |
| Rationale                          | 3  | Describe the rationale for the review in the context of what is already known.                                                                                                                                                                                                                              | 3                  |
| Objectives                         | 4  | Provide an explicit statement of questions being addressed with reference to participants, interventions, comparisons, outcomes, and study design (PICOS).                                                                                                                                                  | 3                  |
| <b>METHODS</b>                     |    |                                                                                                                                                                                                                                                                                                             |                    |
| Protocol and registration          | 5  | Indicate if a review protocol exists, if and where it can be accessed (e.g., Web address), and, if available, provide registration information including registration number.                                                                                                                               | 3 / 19             |
| Eligibility criteria               | 6  | Specify study characteristics (e.g., PICOS, length of follow-up) and report characteristics (e.g., years considered, language, publication status) used as criteria for eligibility, giving rationale.                                                                                                      | 4                  |
| Information sources                | 7  | Describe all information sources (e.g., databases with dates of coverage, contact with study authors to identify additional studies) in the search and date last searched.                                                                                                                                  | 4                  |
| Search                             | 8  | Present full electronic search strategy for at least one database, including any limits used, such that it could be repeated.                                                                                                                                                                               | 4                  |
| Study selection                    | 9  | State the process for selecting studies (i.e., screening, eligibility, included in systematic review, and, if applicable, included in the meta-analysis).                                                                                                                                                   | 4 - 5              |
| Data collection process            | 10 | Describe method of data extraction from reports (e.g., piloted forms, independently, in duplicate) and any processes for obtaining and confirming data from investigators.                                                                                                                                  | 4 - 5              |
| Data items                         | 11 | List and define all variables for which data were sought (e.g., PICOS, funding sources) and any assumptions and simplifications made.                                                                                                                                                                       | 4 - 5              |
| Risk of bias in individual studies | 12 | Describe methods used for assessing risk of bias of individual studies (including specification of whether this was done at the study or outcome level), and how this information is to be used in any data synthesis.                                                                                      | 5                  |
| Summary measures                   | 13 | State the principal summary measures (e.g., risk ratio, difference in means).                                                                                                                                                                                                                               | 5                  |
| Synthesis of results               | 14 | Describe the methods of handling data and combining results of studies, if done, including measures of consistency (e.g., $I^2$ ) for each meta-analysis.                                                                                                                                                   | 5                  |



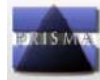

# PRISMA 2009 Checklist

| Section/topic                 | #  | Checklist item                                                                                                                                                                                           | Reported on page #                             |
|-------------------------------|----|----------------------------------------------------------------------------------------------------------------------------------------------------------------------------------------------------------|------------------------------------------------|
| Risk of bias across studies   | 15 | Specify any assessment of risk of bias that may affect the cumulative evidence (e.g., publication bias, selective reporting within studies).                                                             | 5                                              |
| Additional analyses           | 16 | Describe methods of additional analyses (e.g., sensitivity or subgroup analyses, meta-regression), if done, indicating which were pre-specified.                                                         | 5                                              |
| <b>RESULTS</b>                |    |                                                                                                                                                                                                          |                                                |
| Study selection               | 17 | Give numbers of studies screened, assessed for eligibility, and included in the review, with reasons for exclusions at each stage, ideally with a flow diagram.                                          | 6<br>Figure 1                                  |
| Study characteristics         | 18 | For each study, present characteristics for which data were extracted (e.g., study size, PICOS, follow-up period) and provide the citations.                                                             | 6<br>Table 1                                   |
| Risk of bias within studies   | 19 | Present data on risk of bias of each study and, if available, any outcome level assessment (see item 12).                                                                                                | 13<br>Figure 5A                                |
| Results of individual studies | 20 | For all outcomes considered (benefits or harms), present, for each study: (a) simple summary data for each intervention group (b) effect estimates and confidence intervals, ideally with a forest plot. | Figure 2-4<br>Table 2-3<br>Suppl. App. S2 - S3 |
| Synthesis of results          | 21 | Present results of each meta-analysis done, including confidence intervals and measures of consistency.                                                                                                  | 8 - 12<br>Figure 2-4<br>Table 4                |
| Risk of bias across studies   | 22 | Present results of any assessment of risk of bias across studies (see Item 15).                                                                                                                          | 13<br>Figure 5 B                               |
| Additional analysis           | 23 | Give results of additional analyses, if done (e.g., sensitivity or subgroup analyses, meta-regression [see Item 16]).                                                                                    | 8 - 12<br>Figures 2C/D 3C/D                    |
| <b>DISCUSSION</b>             |    |                                                                                                                                                                                                          |                                                |
| Summary of evidence           | 24 | Summarize the main findings including the strength of evidence for each main outcome; consider their relevance to key groups (e.g., healthcare providers, users, and policy makers).                     | 13-14                                          |
| Limitations                   | 25 | Discuss limitations at study and outcome level (e.g., risk of bias), and at review-level (e.g., incomplete retrieval of identified research, reporting bias).                                            | 15                                             |
| Conclusions                   | 26 | Provide a general interpretation of the results in the context of other evidence, and implications for future research.                                                                                  | 16                                             |
| <b>FUNDING</b>                |    |                                                                                                                                                                                                          |                                                |
| Funding                       | 27 | Describe sources of funding for the systematic review and other support (e.g., supply of data); role of funders for the systematic review.                                                               | 18                                             |

From: Moher D, Liberati A, Tetzlaff J, Altman DG, The PRISMA Group (2009). Preferred Reporting Items for Systematic Reviews and Meta-Analyses: The PRISMA Statement. PLoS Med 6(7): e1000097. doi:10.1371/journal.pmed1000097

For peer review only: <http://bmjopen.bmj.com/site/about/guidelines.xhtml>  
For more information, visit: [www.prisma-statement.org](http://www.prisma-statement.org) Page 2 of 2

|    |                                          |                                         |                                          |
|----|------------------------------------------|-----------------------------------------|------------------------------------------|
| 1  | <b>Bleeding</b>                          |                                         |                                          |
| 2  | • Bleeding                               | • Small hemorrhage                      | • Ecchymosis or hematoma                 |
| 3  | • Bleeding at needling site              | • Lesion of blood vessel                | accompanied by pain                      |
| 4  | • Mild / transient / minor bleeding      | • Bruising                              | • Ecchymosis or hematoma without         |
| 5  | • Subcutaneous bleeding                  | • Bruising at needling site             | pain                                     |
| 6  | • Hematoma                               | • Mild / transient bruising             | • Petechia or ecchymosis                 |
| 7  | • Minor hematoma                         | • Heavy bruising                        |                                          |
| 8  | • Subcutaneous / superficial hematoma    | • Subcutaneous bruise                   |                                          |
| 9  | <b>Local pain</b>                        |                                         |                                          |
| 10 | • Pain                                   | • Pain upon insertion / stimulation     | • Mild pain at the acupuncture site      |
| 11 | • Needle (-site) pain                    | • Pain while needle was in place        | more than one hour after treatment       |
| 12 | • Pain where needle was inserted / at    | • Pain upon needle withdrawal at the    | • Pain disappearing after > 3 days       |
| 13 | the site of the needle / in the          | acupuncture point                       | • Chest pain (pneumothorax ruled out)    |
| 14 | punctured region                         | • Pain after needle was removed         | • Electroacupuncture problems e.g. too   |
| 15 | • Mild / transient pain at needling site | • Remaining / residual needle site pain | strong current resulting in pain         |
| 16 | • Severe / strong / significant pain at  | • Prolonged / unacceptable pain at      | • Local muscle pain                      |
| 17 | needling site                            | needle site                             | • Unknown pain                           |
| 18 | <b>Other local AE</b>                    |                                         |                                          |
| 19 | • Wheal                                  | • Inflammation at application site      | • Significant rash on abdomen few days   |
| 20 | • (Local) swelling                       | • Itch                                  | after acupuncture                        |
| 21 | • Redness                                | • Itching and redness                   | • Cellulitis after treatment of          |
| 22 | • Flare                                  | • Itching in the punctured region       | edematous leg                            |
| 23 | • Localized erythema                     | • Itching and erythema (suspected       | • Edema in m. tibialis with anterior toe |
| 24 | • Needle-site / local skin reaction      | contact dermatitis)                     | lifting weakness (fully resolved)        |
| 25 | • (Skin) irritation at acupuncture point | • Local allergic reaction (urticaria)   | • Other local AE (around the             |
| 26 | • Skin infection                         | • Needle allergy                        | acupuncture site)                        |
| 27 | • Local (skin) infection                 | • Allergic phenomena / reaction         |                                          |
| 28 | <b>Central nervous system</b>            |                                         |                                          |
| 29 | • Aphasia                                | • Vertigo                               | • Disturbed vision                       |
| 30 | • Dizziness                              | • Disorientation (length unspecified, 1 | • Spontaneous sensory perceptions        |
| 31 | • Mild / transient dizziness             | h, 1 day)                               | • Shivering                              |
| 32 | • Imbalance                              | • Severe disorientation                 | • Seizure shortly after treatment        |
| 33 | • Severe dizziness, vertigo or loss of   | • Disturbed speech                      | • Tremor                                 |
| 34 | balance                                  | • Slurred speech                        |                                          |
| 35 | <b>Peripheral nervous system</b>         |                                         |                                          |
| 36 | • Cold sensation at needling site        | • Prolonged deqi                        | • Hypaesthesia with numbness for         |
| 37 | • Feeling of acupuncture point at        | • Strong acupuncture or heavy           | three days                               |
| 38 | contralateral arm                        | sensation                               | • Insensibility                          |
| 39 | • Paraesthesia                           | • Hypaesthesia                          | • Itching, pins & needles, tingling or   |
| 40 | • Temporary paraesthesia                 | • Numbness                              | burning sensation                        |
| 41 | • Tingling                               | • Numbness in upper extremity           | • Nerve irritation                       |
| 42 | • Tingling, prickling, burning,          | • Numbness and unusual sensation        | • Neuritis                               |
| 43 | dysaesthesia                             | • Severe stiffness or numbness          |                                          |
| 44 | <b>Aggravation of symptoms</b>           |                                         |                                          |
| 45 | • Aggravation                            | • Transient aggravation of symptoms     | • Worsening of condition (after          |
| 46 | • Aggravation of complaints / existing   | • Aggravation of existing symptoms      | removing needles)                        |
| 47 | ailment / existing symptoms              | followed by improvement                 | • Headache and or facial pain            |
| 48 | • Unexpected, severe or prolonged        | • Deterioration / exacerbation of       | • pressure and or tension in the teeth   |
| 49 | worsening of symptoms                    | symptoms                                | • Increased pain                         |
| 50 | • Aggravation of symptoms during         | • General aggravation of symptoms       |                                          |
| 51 | acupuncture session / after treatment    | • Worsening of health state             |                                          |
| 52 | <b>Vegetative nervous system</b>         |                                         |                                          |
| 53 | • (Generalized) sweating                 | • Abnormal tiredness                    | • Significant / severe drowsiness        |
| 54 | • Isolated sweating of hands             | • Severe / significant tiredness or     | • Drowsiness not causing hazard          |
| 55 | • Mild sweating                          | exhaustion                              | • Prolonged drowsiness (one day, one     |
| 56 | • Flushed cheeks and body warmth         | • Lethargy                              | week)                                    |
| 57 | • Hot flash                              | • Dazed                                 | • Drowsiness or restlessness             |
| 58 | • Feeling of warm / heat / cold          | • Vasovagal reaction: collapse,         | • Orthostatic problems                   |
| 59 | • Coldness / feeling cold                | dizziness, nausea & vomiting            | • Malaise                                |
| 60 | • Freezing                               | • Unconsciousness                       | • Poor concentration                     |
| 61 | • (Feeling of) fatigue                   | • Fainting                              | • Dry lips / mouth                       |
| 62 | • Extreme feeling of fatigue             | • Faint / dizzy                         | • Xerostomia                             |
| 63 | • Feeling tired (mild transient)         | • Feel faint / drowsy                   | • Hunger / thirst                        |
| 64 | • Tiredness and exhaustion               | • Feel faint (significant)              |                                          |

|                                                              |                                                                     |                                                       |
|--------------------------------------------------------------|---------------------------------------------------------------------|-------------------------------------------------------|
| <b>Motor system</b>                                          |                                                                     |                                                       |
| • Cramp                                                      | • Heavy legs                                                        | • Joint problems                                      |
| • General muscle tenderness                                  | • Knee went weak                                                    | • Restricted movement                                 |
| • Muscle spasm / tension / weakness                          | • Weakness in legs / legs or arms                                   | • Stiffness                                           |
| <b>Distant pain</b>                                          |                                                                     |                                                       |
| • Pain / ache / discomfort other than at needling site       | • Mild transient pain not at needling site                          | • Generalized muscle pain                             |
| • Reactive pain at other body sites                          | • Chest pain / tightness                                            | • Other / unspecified pain / aches                    |
| <b>Gastrointestinal / gynaecological system</b>              |                                                                     |                                                       |
| • Nausea                                                     | • Tiredness next day after ten hours of diarrhoea (significant)     | • Increased peristalsis                               |
| • Mild and transient nausea                                  | • Stomach ache                                                      | • Loss of appetite                                    |
| • Severe nausea                                              | • Abdominal distension                                              | • Other gastrointestinal complaints                   |
| • Vomiting                                                   | • Impaired bowel function                                           | • Increased haemorrhage during menses                 |
| • Severe vomiting                                            | • Digestive problems                                                | • Menstrual problems                                  |
| • Constipation                                               | • Enteric- / gastrospasm                                            |                                                       |
| • Diarrhoea                                                  |                                                                     |                                                       |
| <b>Cardiovascular system</b>                                 |                                                                     |                                                       |
| • Cardiovascular / circulatory problems                      | • Increase in blood pressure                                        | • Tachycardia                                         |
| • Depression of blood pressure                               | • Palpitation                                                       | • Other cardiac disturbances                          |
| <b>Respiratory system</b>                                    |                                                                     |                                                       |
| • Asthma attack                                              | • Breathing difficulties                                            | • Bronchitis or airway problems                       |
| <b>Generalized skin reactions</b>                            |                                                                     |                                                       |
| • Dermatological problems                                    | • Other dermatological phenomena                                    |                                                       |
| <b>Headache</b>                                              |                                                                     |                                                       |
| • Headache                                                   | • Headache for three days                                           | • Severe headache or migraine                         |
| • Headache the next day                                      | • Migraine attack                                                   |                                                       |
| <b>Emotional interference</b>                                |                                                                     |                                                       |
| • Aggressive behaviour                                       | • Depressive mood                                                   | • Severe emotional outburst and anger at practitioner |
| • Anxiety                                                    | • Discomfort                                                        | • Fear                                                |
| • Anxiety and panic (up to one hour)                         | • Restlessness or nervousness                                       | • Grief / crying / tearful                            |
| • Significant panic with sensation of heat and sweatiness    | • Disorientation, anxiety, nervousness, insomnia or emotional       | • Needle phobia, anxiety and rage                     |
| • Severe panic / agitation / depression with anxiety         | • Emotional /psychological reaction                                 | • (Severe) nightmares                                 |
| • Depressed emotional state or neurovegetative dystonia      | • (Uncontrolled) euphoria                                           | • Other mood swings                                   |
|                                                              | • Significant emotional release (manic, relaxed, rage or confusion) |                                                       |
| <b>Sleeping problems</b>                                     |                                                                     |                                                       |
| • Sleep disturbances                                         | • Severe sleeping problems                                          | • Insomnia                                            |
| • Impaired sleep                                             | • Severe sleeplessness                                              |                                                       |
| <b>Moxa caused adverse events</b>                            |                                                                     |                                                       |
| • Burn injury                                                | • Burns                                                             | • Blister following moxibustion                       |
| <b>Needling malpractice</b>                                  |                                                                     |                                                       |
| • Left alone / unattended in the treatment room for too long | • Failure to remove needle(s)                                       |                                                       |
| • Broken needle                                              | • Forgotten / dropped needle                                        |                                                       |
| • Stuck or bent needle                                       | • Needle lost or forgotten                                          |                                                       |
| <b>Other or unclassified adverse events</b>                  |                                                                     |                                                       |
| • Change of symptoms                                         | • Nose bleeding                                                     | • Additional comments                                 |
| • Illness                                                    | • Miscellaneous symptoms                                            | • Other systematic symptoms                           |
| • Sick                                                       | • Haematuria on next day                                            | • Other neurological problems                         |
| • (Systemic) infection                                       | • Increased urinary frequency                                       | • Others / unspecified / other (mild) adverse events  |
| • Fever                                                      | • Concomitant diseases of recent appearance                         | • other negative reactions                            |
| • Angina                                                     | • Change of taste                                                   | • Unknown due to incomplete record form               |
| • Eye irritation                                             | • Change of weight / weight reduction                               |                                                       |
| • Irritated tongue                                           |                                                                     |                                                       |

### Online supplementary appendix S3: Categorization of adverse events

Subheadings represent the categories to which adverse events (AE) were assigned. AE descriptors extracted from the included publication are reported verbatim or in spirit in order to provide an overview of the different wordings concerning AE type and severity. Slashes indicate that expressions were also used separately. Terms in brackets indicate that such terms were not used in all of the descriptors with otherwise similar wording.

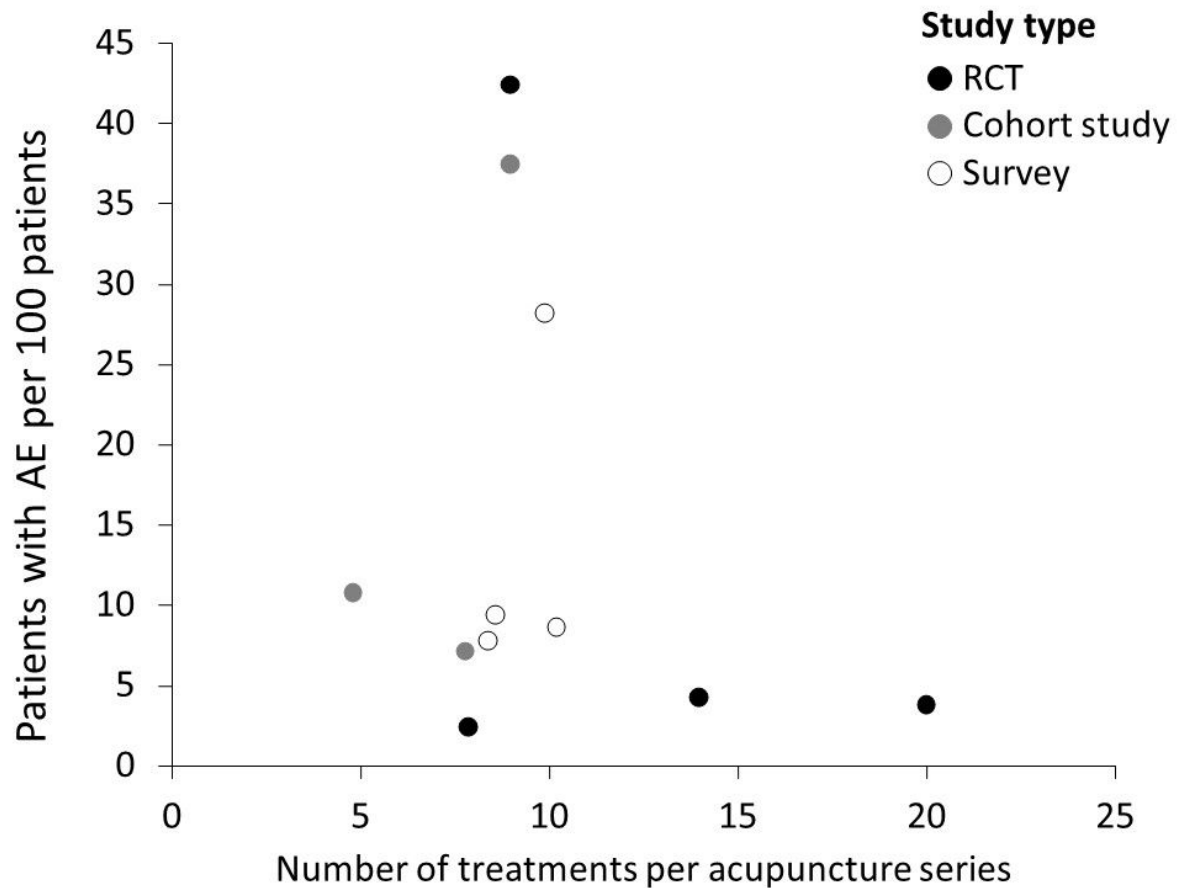

Online supplementary appendix S4: Independence of incidences of adverse events per patient from the number of treatments per acupuncture series and study type

Scatterplot of the number of treatments applied within an acupuncture series against the observed adverse events (AE) incidence as patients with AE per 100 patients

| Study                     | Total number of patients | Risk as patients with AE per 100 patients [95%-CI] |                         |                            |                         |                         |                         |                           |                         |                                          |                         |
|---------------------------|--------------------------|----------------------------------------------------|-------------------------|----------------------------|-------------------------|-------------------------|-------------------------|---------------------------|-------------------------|------------------------------------------|-------------------------|
|                           |                          | Bleeding                                           | Needle sit pain         | Other local AE             | Vegetative reaction     | Aggravation of symptoms | Central nervous system  | Peripheral nervous system | Distant pain            | Gastrointestinal / gynaecological system | Unclassified AE         |
| List 1992                 | 29                       |                                                    | 44.83<br>[27.46; 62.87] |                            | 58.62<br>[40.52; 75.59] | 93.10<br>[81.26; 99.30] | 37.93<br>[21.45; 55.99] | 27.59<br>[13.14; 44.96]   |                         | 17.24<br>[5.94; 32.83]                   | 3.45<br>[0.00; 12.99]   |
| Chung 2015                | 59                       | 15.25<br>[7.30; 25.45]                             | 32.20<br>[20.99; 44.57] | 35.59<br>[23.97; 48.14]    | 13.56<br>[6.10; 23.38]  |                         | 5.08<br>[0.99; 12.08]   | 11.86<br>[4.94; 21.26]    |                         | 5.08<br>[0.99; 12.08]                    | 3.39<br>[0.33; 9.47]    |
| Wen 2016                  | 120                      | 0.83<br>[0.00; 3.24]                               | 2.50<br>[0.48; 6.04]    |                            |                         |                         |                         |                           | 0.83<br>[0.00; 3.24]    |                                          |                         |
| Melchart 1998             | 121                      | 3.31<br>[0.88; 7.21]                               | 14.05<br>[8.46; 20.78]  | 1.65<br>[0.16; 4.68]       | 8.26<br>[4.05; 13.81]   | 10.74<br>[5.88; 16.85]  | 2.48<br>[0.48; 5.99]    | 0.83<br>[0.00; 3.21]      | 0.83<br>[0.00; 3.21]    | 4.13<br>[1.33; 8.39]                     |                         |
| Leung 2009                | 254                      | 2.36<br>[0.86; 4.58]                               |                         |                            |                         |                         |                         |                           |                         |                                          |                         |
| Yamashita 2000            | 391                      |                                                    | 0.26<br>[0.00; 1.00]    | 1.02<br>[0.27; 2.26]       | 11.76<br>[8.76; 15.14]  | 2.81<br>[1.41; 4.68]    | 0.77<br>[0.15; 1.87]    |                           |                         |                                          |                         |
| Ernst 2003                | 409                      | 25.18<br>[21.10; 29.50]                            | 8.07<br>[5.63; 10.90]   | 0.24<br>[0.00; 0.96]       | 6.36<br>[4.20; 8.92]    | 0.98<br>[0.26; 2.16]    | 6.11<br>[4.00; 8.64]    | 4.89<br>[3.01; 7.19]      |                         | 1.96<br>[0.84; 3.52]                     | 17.85<br>[14.29; 21.70] |
| Zhao 2011                 | 1968                     | 3.40<br>[2.65; 4.25]                               | 0.05<br>[0.00; 0.20]    |                            | 0.10<br>[0.01; 0.29]    |                         | 0.05<br>[0.00; 0.20]    |                           |                         | 0.05<br>[0.00; 0.20]                     |                         |
| Furuse 2017               | 2180                     | 12.80<br>[11.43; 14.23]                            | 6.24<br>[5.26; 7.29]    |                            |                         | 1.06<br>[0.67; 1.53]    |                         |                           |                         |                                          | 1.10<br>[0.71; 1.58]    |
| Weidenhammer 2008 pat.    | 5998                     | 0.48<br>[0.32; 0.67]                               | 0.32<br>[0.19; 0.47]    | 0.32<br>[0.19; 0.47]       | 2.72<br>[2.32; 3.14]    | 0.80<br>[0.59; 1.04]    | 0.90<br>[0.68; 1.16]    | 0.47<br>[0.31; 0.66]      | 0.95<br>[0.72; 1.21]    | 0.62<br>[0.43; 0.83]                     | 0.47<br>[0.31; 0.66]    |
| MacPherson 2004           | 6348                     | 0.58<br>[0.41; 0.79]                               | 1.86<br>[1.54; 2.21]    | 0.36<br>[0.23; 0.53]       | 4.69<br>[4.19; 5.23]    | 1.20<br>[0.94; 1.48]    | 0.87<br>[0.65; 1.11]    | 0.65<br>[0.46; 0.86]      | 0.17<br>[0.09; 0.29]    | 0.96<br>[0.74; 1.22]                     | 0.38<br>[0.24; 0.54]    |
| Melchart 2004             | 97733                    | 4.56<br>[4.43; 4.70]                               | 3.28<br>[3.17; 3.39]    | 0.18<br>[0.15; 0.20]       | 0.48<br>[0.44; 0.53]    | 0.12<br>[0.10; 0.14]    |                         |                           |                         |                                          | 0.33<br>[0.29; 0.36]    |
| Endres 2004               | 190924                   | 5.18<br>[5.08; 5.28]                               | 0.05<br>[0.04; 0.06]    | 24.51<br>[24.31; 24.70]    | 0.70<br>[0.67; 0.74]    | 1.31<br>[1.26; 1.36]    |                         | 0.08<br>[0.07; 0.10]      |                         |                                          | 0.07<br>[0.05; 0.08]    |
| Witt 2009                 | 229230                   | 6.15<br>[6.05; 6.24]                               | 0.45<br>[0.43; 0.48]    | 0.60<br>[0.57; 0.63]       | 0.30<br>[0.28; 0.33]    | 0.40<br>[0.38; 0.43]    | 0.26<br>[0.24; 0.28]    | 0.26<br>[0.24; 0.28]      | 0.76<br>[0.72; 0.79]    | 0.22<br>[0.20; 0.24]                     | 0.11<br>[0.10; 0.12]    |
| Weidenhammer 2008 therap. | 503397                   | 4.84<br>[4.78; 4.90]                               | 3.95<br>[3.90; 4.01]    | 0.15<br>[0.14; 0.16]       | 0.08<br>[0.07; 0.08]    | 0.08<br>[0.07; 0.09]    |                         |                           |                         | 0.01<br>[0.01; 0.02]                     | 0.26<br>[0.25; 0.28]    |
| Fixed effect              |                          | 5.09<br>[5.05; 5.13]                               | 1.81<br>[1.78; 1.84]    | 1.85<br>[1.83; 1.88]       | 0.25<br>[0.24; 0.26]    | 0.29<br>[0.28; 0.30]    | 0.28<br>[0.26; 0.31]    | 0.18<br>[0.17; 0.19]      | 0.74<br>[0.71; 0.77]    | 0.06<br>[0.05; 0.06]                     | 0.19<br>[0.18; 0.20]    |
| Random effect             |                          | 4.67<br>[2.08; 8.22]                               | 3.75<br>[0.74; 8.94]    | 2.79<br>[0.02; 10.01]      | 1.95<br>[0.40; 4.63]    | 1.48<br>[0.00; 5.90]    | 1.45<br>[0.07; 4.51]    | 0.69<br>[0.02; 2.34]      | 0.60<br>[0.21; 1.20]    | 0.60<br>[0.04; 1.81]                     | 0.57<br>[0.01; 1.95]    |
| tau <sup>2</sup>          |                          | 0.0008                                             | 0.0085                  | 0.0494                     | 0.0012                  | 0.0017                  | 0.0018                  | 0.0004                    | 0.0005                  | 0.0008                                   | 0.0003                  |
| I <sup>2</sup>            |                          | 99.4%<br>[99.3%; 99.5%]                            | 99.9%<br>[99.9%; 99.9%] | 100.0%<br>[100.0%; 100.0%] | 99.7%<br>[99.7%; 99.7%] | 99.8%<br>[99.8%; 99.8%] | 96.3%<br>[94.6%; 97.5%] | 98.1%<br>[97.4%; 98.7%]   | 92.6%<br>[85.7%; 96.2%] | 99.3%<br>[99.1%; 99.4%]                  | 99.0%<br>[98.7%; 99.2%] |
| p-value Q-test            |                          | < 0.0001                                           | < 0.0001                | < 0.0001                   | < 0.0001                | < 0.0001                | < 0.0001                | < 0.0001                  | < 0.0001                | < 0.0001                                 | < 0.0001                |

| Study                     | Total number of patients | Risk as patients with AE per 100 patients [95%-CI] |                         |                         |                           |                         |                         |                         |                         |                        |
|---------------------------|--------------------------|----------------------------------------------------|-------------------------|-------------------------|---------------------------|-------------------------|-------------------------|-------------------------|-------------------------|------------------------|
|                           |                          | Headache                                           | Cardiovascular system   | Motor system            | Generalized skin reaction | Needling malpractice    | Emotional interference  | Sleeping problems       | Moxibustion AE          | Respiratory system     |
| List 1992                 | 29                       |                                                    |                         | 41,38<br>[24,41; 59,48] |                           |                         |                         | 20,69<br>[8,19; 37,03]  |                         |                        |
| Chung 2015                | 59                       | 13.56<br>[6.0980; 23.38]                           |                         |                         | 1,69<br>[0,00; 6,52]      | 0,00<br>[0,00; 1,62]    |                         |                         |                         |                        |
| Wen 2016                  | 120                      |                                                    |                         |                         |                           |                         |                         |                         |                         |                        |
| Melchart 1998             | 121                      |                                                    | 0.83<br>[0,00; 3,21]    |                         |                           |                         | 0,83<br>[0,00; 3,21]    |                         |                         |                        |
| Leung 2009                | 254                      |                                                    |                         |                         |                           |                         |                         |                         |                         |                        |
| Yamashita 2000            | 391                      | 0.51<br>[0.0485; 1.46]                             |                         |                         |                           |                         |                         |                         |                         |                        |
| Ernst 2003                | 409                      | 0.49<br>[0.0463; 1.40]                             | 0.49<br>[0.05; 1.40]    | 0,24<br>[0,00; 0,96]    |                           |                         | 0,98<br>[0,26; 2,16]    |                         |                         | 0,24<br>[0,00; 0,96]   |
| Zhao 2011                 | 1968                     |                                                    |                         | 0,10<br>[0,01; 0,29]    |                           |                         |                         |                         |                         |                        |
| Furuse 2017               | 2180                     | 0.05<br>[0.0000; 0.18]                             |                         |                         |                           | 0,60<br>[0,32; 0,96]    |                         |                         | 0,96<br>[0,60; 1,42]    |                        |
| Weidenhammer 2008 pat.    | 5998                     | 1.37<br>[1.0889; 1.68]                             | 0.60<br>[0.42; 0.81]    | 0,35<br>[0,22; 0,52]    |                           |                         |                         | 0,13<br>[0,06; 0,24]    |                         | 0,07<br>[0,02; 0,15]   |
| MacPherson 2004           | 6348                     | 1.21<br>[0.9585; 1.50]                             |                         |                         |                           | 1,04<br>[0,81; 1,30]    | 1,24<br>[0,99; 1,53]    | 0,74<br>[0,54; 0,97]    | 0,44<br>[0,29; 0,62]    |                        |
| Melchart 2004             | 97733                    | 0.04<br>[0.0275; 0.05]                             |                         |                         |                           | 0,25<br>[0,22; 0,28]    |                         |                         |                         |                        |
| Endres 2004               | 190924                   |                                                    |                         |                         |                           | 0,00<br>[0,00; 0,00]    | 0,04<br>[0,03; 0,05]    | 0,04<br>[0,03; 0,05]    | 0,00<br>[0,00; 0,00]    |                        |
| Witt 2009                 | 229230                   | 0.52<br>[0.4944; 0.55]                             | 0.27<br>[0.25; 0.29]    | 0,08<br>[0,07; 0,09]    | 0,09<br>[0,08; 0,10]      | 0,01<br>[0,00; 0,01]    | 0,09<br>[0,08; 0,11]    | 0,04<br>[0,03; 0,05]    | 0,01<br>[0,00; 0,01]    | 0,02<br>[0,01; 0,02]   |
| Weidenhammer 2008 therap. | 503397                   | 0.03<br>[0.0287; 0.04]                             | 0.42<br>[0.40; 0.43]    |                         |                           | 0,28<br>[0,27; 0,30]    | 0,0197<br>[0,02; 0,02]  |                         |                         |                        |
| Fixed effect              |                          | 0.12<br>[0.11; 0.13]                               |                         | 0,09<br>[0,08; 0,10]    | 0,09<br>[0,08; 0,10]      | 0,11<br>[0,11; 0,12]    | 0,04<br>[0,04; 0,04]    | 0,05<br>[0,04; 0,05]    | 0,00<br>[0,00; 0,01]    | 0,02<br>[0,01; 0,02]   |
| Random effect             |                          | 0.51<br>[0.03; 1.55]                               | 0.40<br>[0.24; 0.61]    | 0,38<br>[0,00; 4,79]    | 0,35<br>[0,00; 35,67]     | 0,22<br>[0,01; 0,67]    | 0,20<br>[0,00; 0,81]    | 0,16<br>[0,00; 0,91]    | 0,14<br>[0,00; 1,16]    | 0,04<br>[0,00; 0,26]   |
| tau <sup>2</sup>          |                          | 0.0012                                             | 0.0001                  | 0.0011                  | 0.0029                    | 0.0009                  | 0.0002                  | 0.0001                  | 0.0002                  | 0.0001                 |
| I <sup>2</sup>            |                          | 99.6%<br>[99.6%; 99.7%]                            | 96.4%<br>[93.9%; 97.9%] | 94.6%<br>[90.2%; 97.1%] | = 58.2%<br>[0.0%; 90.1%]  | 99.7%<br>[99.7%; 99.8%] | 98.7%<br>[98.2%; 99.1%] | 97.1%<br>[95.3%; 98.2%] | 98.3%<br>[97.3%; 99.0%] | 69.0%<br>[0.0%; 91.0%] |
| p-value Q-test            |                          | < 0.0001                                           | < 0.0001                | < 0.0001                | 0.1221                    | < 0.0001                | < 0.0001                | < 0.0001                | < 0.0001                | 0.0398                 |

### Online supplementary appendix S5: Risks for different types of adverse events per 100 patients undergoing an acupuncture series as reported in single studies

Summary risk estimates of adverse events (AE) derived from random effects meta-analyses displayed in table 4

| Study            | Total number of treatments | Risk as treatments with AE per 100 treatments [95%-CI] |                         |                         |                           |                         |                         |                           |                         |                                     |                         |
|------------------|----------------------------|--------------------------------------------------------|-------------------------|-------------------------|---------------------------|-------------------------|-------------------------|---------------------------|-------------------------|-------------------------------------|-------------------------|
|                  |                            | Bleeding                                               | Pain                    | Other local AE          | Vegetative nervous system | Aggravation of symptoms | Central nervous system  | Peripheral nervous system | Distant pain            | Gastrointestinal /gynaecological AE | Unclassified AE         |
| Yamashita 2000   | 1441                       | 45.45<br>[42.89; 48.03]                                | 15.75<br>[13.92; 17.68] | 0.90<br>[0.48; 1.46]    | 4.72<br>[3.69; 5.87]      | 1.11<br>[0.63; 1.72]    | 0.35<br>[0.11; 0.72]    |                           | 0.07<br>[0.00; 0.27]    |                                     |                         |
| daSilva 2014     | 13884                      | 4.11<br>[3.79; 4.45]                                   | 3.02<br>[2.74; 3.31]    | 0.43<br>[0.33; 0.55]    | 0.02<br>[0.00; 0.05]      |                         | 0.01<br>[0.00; 0.03]    | 0.11<br>[0.06; 0.17]      |                         | 0.04<br>[0.01; 0.07]                |                         |
| Melchart 1998    | 1200                       | 0.33<br>[0.09; 0.74]                                   | 4.17<br>[3.11; 5.37]    | 0.17<br>[0.02; 0.48]    | 2.58<br>[1.76; 3.56]      | 1.75<br>[1.09; 2.57]    | 0.25<br>[0.05; 0.61]    | 0.08<br>[0.00; 0.33]      | 0.08<br>[0.00; 0.33]    | 0.42<br>[0.13; 0.86]                |                         |
| MacPherson 2005  | 9408                       | 4.72<br>[4.30; 5.16]                                   | 12.27<br>[11.61; 12.94] | 0.26<br>[0.16; 0.37]    | 27.87<br>[26.97; 28.78]   | 1.75<br>[1.50; 2.03]    |                         | 0.35<br>[0.24; 0.48]      | 4.49<br>[4.08; 4.91]    | 1.18<br>[0.97; 1.41]                | 0.35<br>[0.24; 0.48]    |
| Furuse 2017      | 14039                      | 3.16<br>[2.88; 3.46]                                   | 1.25<br>[1.07; 1.44]    | 0.09<br>[0.04; 0.14]    | 0.63<br>[0.51; 0.77]      | 0.20<br>[0.13; 0.28]    | 0.09<br>[0.05; 0.15]    | 0.07<br>[0.03; 0.12]      |                         | 0.10<br>[0.05; 0.16]                | 0.20<br>[0.13; 0.28]    |
| Ernst 2003       | 3535                       | 5.18<br>[4.47; 5.93]                                   | 1.30<br>[0.95; 1.70]    | 0.08<br>[0.02; 0.21]    | 2.46<br>[1.98; 3.00]      | 0.25<br>[0.12; 0.45]    | 1.08<br>[0.76; 1.44]    | 1.44<br>[1.08; 1.86]      |                         | 0.34<br>[0.17; 0.56]                | 5.46<br>[4.74; 6.23]    |
| Odsberg 2001     | 9277                       | 18.44<br>[17.66; 19.24]                                | 0.08<br>[0.03; 0.14]    | 0.05<br>[0.02; 0.11]    | 1.42<br>[1.19; 1.67]      | 2.33<br>[2.03; 2.65]    | 0.18<br>[0.11; 0.28]    | 0.01<br>[0.00; 0.04]      |                         | 0.02<br>[0.00; 0.06]                | 0.06<br>[0.02; 0.13]    |
| Yamashita 1999   | 65482                      | 0.03<br>[0.02; 0.05]                                   | 0.01<br>[0.00; 0.02]    | 0.00<br>[0.00; 0.01]    | 0.00<br>[0.00; 0.01]      | 0.00<br>[0.00; 0.01]    | 0.01<br>[0.00; 0.02]    | 0.00<br>[0.00; 0.01]      |                         | 0.01<br>[0.00; 0.02]                | 0.00<br>[0.00; 0.01]    |
| Park 2009        | 1095                       | 8.40<br>[6.83; 10.12]                                  | 3.38<br>[2.39; 4.53]    |                         | 3.11<br>[2.16; 4.21]      |                         | 0.82<br>[0.37; 1.44]    | 1.46<br>[0.84; 2.26]      |                         |                                     | 0.46<br>[0.14; 0.94]    |
| Leung 2009       | 2000                       | 0.40<br>[0.17; 0.72]                                   |                         |                         |                           |                         |                         |                           |                         |                                     |                         |
| Park 2010        | 3071                       | 1.95<br>[1.49; 2.47]                                   | 0.49<br>[0.27; 0.77]    | 0.10<br>[0.02; 0.24]    | 0.75<br>[0.66; 0.85]      | 0.07<br>[0.01; 0.19]    | 0.03<br>[0.00; 0.13]    | 0.26<br>[0.11; 0.47]      |                         | 0.03<br>[0.00; 0.13]                | 0.03<br>[0.00; 0.13]    |
| White 2001       | 31822                      | 3.09<br>[2.90; 3.28]                                   | 1.15<br>[1.04; 1.27]    | 0.10<br>[0.07; 0.13]    | 4.73<br>[4.50; 4.95]      | 0.98<br>[0.87; 1.09]    | 0.01<br>[0.00; 0.03]    | 0.00<br>[0.00; 0.01]      |                         | 0.02<br>[0.01; 0.04]                | 0.46<br>[0.39; 0.54]    |
| MacPherson 2001  | 34407                      | 2.08<br>[1.93; 2.23]                                   | 1.24<br>[1.12; 1.35]    | 0.01<br>[0.00; 0.02]    | 4.73<br>[4.50; 4.95]      | 2.83<br>[2.66; 3.01]    | 0.63<br>[0.55; 0.71]    |                           | 0.51<br>[0.44; 0.59]    | 0.31<br>[0.25; 0.37]                | 0.86<br>[0.76; 0.96]    |
| Fixed effect     |                            | 1.87<br>[1.80; 1.93]                                   | 0.82<br>[0.78; 0.87]    | 0.05<br>[0.04; 0.06]    | 1.08<br>[1.04; 1.13]      | 0.58<br>[0.55; 0.62]    | 0.09<br>[0.07; 0.10]    | 0.03<br>[0.02; 0.04]      | 0.96<br>[0.87; 1.05]    | 0.08<br>[0.07; 0.09]                | 0.23<br>[0.20; 0.25]    |
| Random effect    |                            | 4.92<br>[1.18; 11.01]                                  | 2.43<br>[0.63; 5.35]    | 0.13<br>[0.04; 0.27]    | 2.24<br>[0.21; 6.35]      | 0.84<br>[0.26; 1.75]    | 0.20<br>[0.05; 0.46]    | 0.19<br>[0.02; 0.55]      | 0.73<br>[0.00; 5.02]    | 0.15<br>[0.03; 0.38]                | 0.47<br>[0.03; 1.46]    |
| tau <sup>2</sup> |                            | 0.0169                                                 | 0.0095                  | 0.0004                  | 0.0213                    | 0.0055                  | 0.0011                  | 0.0008                    | 0.0085                  | 0.0008                              | 0.0025                  |
| I <sup>2</sup>   |                            | 99.9%<br>[99.9%; 99.9%]                                | 99.8%<br>[99.8%; 99.8%] | 96.4%<br>[94.9%; 97.4%] | 99.9%<br>[99.9%; 99.9%]   | 99.7%<br>[99.6%; 99.7%] | 98.4%<br>[97.9%; 98.8%] | 97.5%<br>[96.6%; 98.2%]   | 99.5%<br>[99.4%; 99.7%] | 98.2%<br>[97.6%; 98.6%]             | 99.4%<br>[99.2%; 99.5%] |
| p-value Q-test   |                            | < 0.0001                                               | < 0.0001                | 0.0001                  | < 0.0001                  | < 0.0001                | 0.0001                  | < 0.0001                  | 0.0001                  | 0.0001                              | 0.0001                  |



| Study                  | Total number of treatments | Risk as treatments with AE per 100 treatments [95%-CI] |                        |                        |                           |                         |                         |                   |                         |                      |
|------------------------|----------------------------|--------------------------------------------------------|------------------------|------------------------|---------------------------|-------------------------|-------------------------|-------------------|-------------------------|----------------------|
|                        |                            | Headache                                               | Cardiovascular system  | Motor system           | Generalized skin reaction | Needling malpractice    | Emotional interference  | Sleeping problems | Moxibustion AE          | Respiratory system   |
| Yamashita2000          | 1441                       | 0.14<br>[0.01; 0.40]                                   |                        |                        |                           | 0.62<br>[0.28; 1.10]    |                         |                   |                         |                      |
| daSilva2014            | 13884                      |                                                        |                        |                        |                           | 0.24<br>[0.16; 0.33]    |                         |                   |                         |                      |
| Melchart1998           | 1200                       |                                                        | 0.08<br>[0.00; 0.33]   |                        |                           |                         | 0.08<br>[0.00; 0.33]    |                   |                         |                      |
| MacPherson2005         | 9408                       |                                                        |                        |                        |                           |                         | 0.67<br>[0.51; 0.84]    |                   |                         |                      |
| Furuse2017             | 14039                      | 0.01<br>[0.00; 0.03]                                   | 0.01<br>[0.00; 0.04]   |                        |                           | 0.10<br>[0.05; 0.16]    |                         |                   | 0.17<br>[0.11; 0.25]    |                      |
| Ernst2003              | 3535                       | 0.06<br>[0.01; 0.16]                                   | 0.06<br>[0.01; 0.16]   | 0.03<br>[0.00; 0.11]   |                           |                         | 0.11<br>[0.03; 0.25]    |                   |                         | 0.03<br>[0.00; 0.11] |
| Odsberg2001            | 9277                       | 0.05<br>[0.02; 0.11]                                   |                        | 0.01<br>[0.00; 0.04]   |                           |                         | 0.04<br>[0.01; 0.10]    |                   |                         |                      |
| Yamashita1999          | 65482                      |                                                        |                        |                        |                           | 0.04<br>[0.03; 0.06]    | 0.01<br>[0.00; 0.02]    |                   | 0.01<br>[0.00; 0.02]    |                      |
| Park2009               | 1095                       |                                                        |                        |                        |                           |                         |                         |                   |                         |                      |
| Leung2009              | 2000                       |                                                        |                        |                        |                           |                         |                         |                   |                         |                      |
| Park2010               | 3071                       | 0.03<br>[0.00; 0.13]                                   |                        | 0.10<br>[0.02; 0.24]   |                           | 0.10<br>[0.02; 0.24]    |                         |                   |                         |                      |
| White2001              | 31822                      | 0.11<br>[0.08; 0.15]                                   |                        | 0.00<br>[0.00; 0.01]   |                           | 0.15<br>[0.11; 0.19]    | 0.01<br>[0.00; 0.02]    |                   | 0.00<br>[0.00; 0.01]    |                      |
| MacPherson2001         | 34407                      | 0.00<br>[0.00; 0.01]                                   |                        | 0.00<br>[0.00; 0.01]   |                           | 0.01<br>[0.00; 0.02]    | 0.01<br>[0.00; 0.03]    |                   | 0.00<br>[0.00; 0.01]    |                      |
| <b>Fixed effect</b>    |                            | 0.03<br>[0.02; 0.05]                                   | 0.02<br>[0.01; 0.05]   | 0.01<br>[0.00; 0.01]   |                           | 0.06<br>[0.05; 0.08]    | 0.03<br>[0.02; 0.03]    |                   | 0.01<br>[0.01; 0.02]    |                      |
| <b>Random effect</b>   |                            | 0.04<br>[0.01; 0.10]                                   | 0.03<br>[0.00; 0.13]   | 0.01<br>[0.00; 0.04]   |                           | 0.12<br>[0.02; 0.28]    | 0.08<br>[0.00; 0.27]    |                   | 0.02<br>[0.00; 0.18]    | 0.03<br>[0.00; 0.11] |
| <b>tau<sup>2</sup></b> |                            | 0.0002                                                 | 0.0001                 | 0.0001                 |                           | 0.0002                  | 0.0004                  |                   | 0.0001                  |                      |
| <b>I<sup>2</sup></b>   |                            | 90.3%<br>[82.5%; 94.6%]                                | 21.2%<br>[0.0%; 91.8%] | 58.1%<br>[0.0%; 84.4%] |                           | 95.1%<br>[92.0%; 96.9%] | 96.8%<br>[95.1%; 97.9%] |                   | 95.0%<br>[90.3%; 97.5%] |                      |
| <b>p-value Q-test</b>  |                            | 0.0001                                                 | 0.2811                 | 0.0489                 |                           | 0.0001                  | 0.0001                  |                   | 0.0001                  |                      |

#### Online supplementary appendix S6: Risks for different types of adverse events per 100 treatments as reported in single studies

Summary risk estimates of adverse events (AE) derived from random effects meta-analyses displayed in table 4

# BMJ Open

## Acupuncture related adverse events – systematic review and meta-analyses of prospective clinical studies

|                                 |                                                                                                                                                                                                                                                                                                                                                                                                                                                                               |
|---------------------------------|-------------------------------------------------------------------------------------------------------------------------------------------------------------------------------------------------------------------------------------------------------------------------------------------------------------------------------------------------------------------------------------------------------------------------------------------------------------------------------|
| Journal:                        | <i>BMJ Open</i>                                                                                                                                                                                                                                                                                                                                                                                                                                                               |
| Manuscript ID                   | bmjopen-2020-045961.R1                                                                                                                                                                                                                                                                                                                                                                                                                                                        |
| Article Type:                   | Original research                                                                                                                                                                                                                                                                                                                                                                                                                                                             |
| Date Submitted by the Author:   | 20-May-2021                                                                                                                                                                                                                                                                                                                                                                                                                                                                   |
| Complete List of Authors:       | Bäumler, Petra; University Hospital Munich, Multidisciplinary Pain Centre, Department of Anaesthesiology<br>Zhang, Wenyue; Beijing University of Chinese Medicine, School of Acupuncture, Moxibustion and Tuina, Beijing Rehabilitation Hospital<br>Stübinger, Theresa; University Hospital Munich, Multidisciplinary Pain Centre, Department of Anaesthesiology<br>Irnich, Dominik; University Hospital Munich, Multidisciplinary Pain Centre, Department of Anaesthesiology |
| <b>Primary Subject Heading</b>: | Anaesthesia                                                                                                                                                                                                                                                                                                                                                                                                                                                                   |
| Secondary Subject Heading:      | Complementary medicine, Public health                                                                                                                                                                                                                                                                                                                                                                                                                                         |
| Keywords:                       | Adverse events < THERAPEUTICS, Risk management < HEALTH SERVICES ADMINISTRATION & MANAGEMENT, Pain management < ANAESTHETICS, COMPLEMENTARY MEDICINE, GENERAL MEDICINE (see Internal Medicine), Quality in health care < HEALTH SERVICES ADMINISTRATION & MANAGEMENT                                                                                                                                                                                                          |
|                                 |                                                                                                                                                                                                                                                                                                                                                                                                                                                                               |

SCHOLARONE™  
Manuscripts

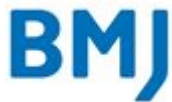

I, the Submitting Author has the right to grant and does grant on behalf of all authors of the Work (as defined in the below author licence), an exclusive licence and/or a non-exclusive licence for contributions from authors who are: i) UK Crown employees; ii) where BMJ has agreed a CC-BY licence shall apply, and/or iii) in accordance with the terms applicable for US Federal Government officers or employees acting as part of their official duties; on a worldwide, perpetual, irrevocable, royalty-free basis to BMJ Publishing Group Ltd ("BMJ") its licensees and where the relevant Journal is co-owned by BMJ to the co-owners of the Journal, to publish the Work in this journal and any other BMJ products and to exploit all rights, as set out in our [licence](#).

The Submitting Author accepts and understands that any supply made under these terms is made by BMJ to the Submitting Author unless you are acting as an employee on behalf of your employer or a postgraduate student of an affiliated institution which is paying any applicable article publishing charge ("APC") for Open Access articles. Where the Submitting Author wishes to make the Work available on an Open Access basis (and intends to pay the relevant APC), the terms of reuse of such Open Access shall be governed by a Creative Commons licence – details of these licences and which [Creative Commons](#) licence will apply to this Work are set out in our licence referred to above.

Other than as permitted in any relevant BMJ Author's Self Archiving Policies, I confirm this Work has not been accepted for publication elsewhere, is not being considered for publication elsewhere and does not duplicate material already published. I confirm all authors consent to publication of this Work and authorise the granting of this licence.

## Acupuncture related adverse events – systematic review and meta-analyses of prospective clinical studies

Petra Bäumlér, Wenyue Zhang, Theresa Stübinger, Dominik Irnich

Multidisciplinary Pain Centre, Department of Anaesthesiology, LMU University Hospital, Munich, Germany

P Bäumlér postdoctoral research assistant

Multidisciplinary Pain Centre, Department of Anaesthesiology, LMU University Hospital, Munich, Germany

D Irnich professor of medicine

Multidisciplinary Pain Centre, Department of Anaesthesiology, LMU University Hospital, Munich, Germany

T Stübinger doctoral graduate

School of Acupuncture, Moxibustion and Tuina, Beijing University of Chinese Medicine & Beijing Rehabilitation Hospital, Beijing, China

W Zhang doctoral graduate

### Corresponding author

Dr. biol. hum. Petra I. Bäumlér, MSc, MPH

Multidisciplinary Pain Centre, Department of Anaesthesiology

LMU University Hospital Munich

Pettenkoferstr. 8a, 80336 Munich

E-mail: Petra.Baeumler@med.uni-muenchen.de

ORCID-ID: 0000-0002-3262-2993

“The Corresponding Author has the right to grant on behalf of all authors and does grant on behalf of all authors, a worldwide licence to the Publishers and its licensees in perpetuity, in all forms, formats and media (whether known now or created in the future), to i) publish, reproduce, distribute, display and store the Contribution, ii) translate the Contribution into other languages, create adaptations, reprints, include within collections and create summaries, extracts and/or, abstracts of the Contribution, iii) create any other derivative work(s) based on the Contribution, iv) to exploit all subsidiary rights in the Contribution, v) the inclusion of electronic links from the Contribution to third party material where-ever it may be located; and, vi) licence any third party to do any or all of the above.”

### Word count

6404

## Abstract

### Objective

Overview on risks for acupuncture related adverse events (AE).

### Design

Systematic review and meta-analysis of prospective studies.

### Data sources

Pubmed, Scopus, and EMBASE from inception date to September 15, 2019.

### Eligibility criteria for selecting studies

Prospective studies assessing AE caused by needle acupuncture in humans as primary outcome published in English or German

### Data extraction and synthesis

Two independent researchers selected articles, extracted the data and assessed study quality. Overall risks and risks for different AE categories were obtained from random effects meta-analyses.

### Main outcomes

Overall risk for minor AE and serious AE (SAE) per patients and per treatments

### Results

Out of 7679 screened articles 22 reporting on 21 studies were included. Meta-analyses suggest at least one AE occurring in 9.31% (95%-CI 5.10 to 14.62; 11 studies) of patients undergoing an acupuncture series and in 7.57% (95%-CI 1.43 to 17.95; 5 studies) of treatments. Summary risk estimates for SAE were 1.01 (95%-CI 0.23 to 2.33; 11 studies) per 10,000 patients and 7.98 (95%-CI 1.39 to 20.00; 14 studies) per 1 million treatments, for AE requiring treatment 1.14 (95%-CI 0.00 to 7.37; eight studies) per 1000 patients. Heterogeneity was substantial ( $I^2 > 80\%$ ). On average 9.4 AE occurred in 100 treatments of which half were bleeding, pain, or flare at the needle site argued to represent intended acupuncture reaction. AE definitions and assessments varied largely.

### Conclusion

Acupuncture can be considered among the safer treatments in medicine. SAE are rare, and most common minor AE are very mild. AE requiring medical management are uncommon, but necessitate medical competence to assure patient safety. Clinical and methodological heterogeneity call for standardized AE assessments tools, clear criteria for differentiating acupuncture related AE from therapeutically desired reactions, and identification of patient related risk factors for AE.

### PROSPERO registration number

CRD42020151930

## Keywords

Adverse effects, adverse reactions, meta-analysis, safety, risk, pneumothorax

### Strengths and limitations of this study

- First systematic review on acupuncture related adverse events including a risk of bias assessment
- First meta-analyses on adverse events related to acupuncture
- Complying with PRISMA guidelines
- Combining studies with heterogeneous AE definitions, but providing respective sensitivity analyses
- Causality assessment based on descriptions of adverse events as available from the included articles

For peer review only

## Introduction

Acupuncture describes the insertion of fine needles at defined points on the patients' body for therapeutic or preventive purposes. It is used worldwide with growing popularity. In the EU acupuncture was identified as the most frequently provided method of complementary and alternative medicine (CAM) with 80,000 physicians and 16,380 non-medical practitioners.(1) In the UK alone 2.3 million traditional acupuncture treatments are carried each year.(2) In the US the number of acupuncturists doubled between 2002 and 2012.(3) The effectiveness of acupuncture is supported by level 1a evidence e.g. for chronic musculoskeletal pain and headache,(4-6) post-operative pain,(7, 8) post-operative nausea and vomiting,(9) as well as allergic rhinitis.(10) Furthermore, promising evidence exists for its potential role in the treatment of a large number of additional indications such as stroke rehabilitation,(11) depression,(12) aromatase inhibitor induced arthralgia,(13) and asthma.(14) Thus, acupuncture offers a non-pharmacological treatment option for various highly prevalent conditions with great disease burden and significant health economic impact. Long-term pharmacological treatment of these conditions is often associated with substantial side effects.(15, 16) Consequently, also risk estimates on acupuncture related adverse events (AE) are required for evidence-based risk benefit considerations that are essential for clinical decision making.

However, uncertainty remains about acupuncture safety. AE related to acupuncture are repeatedly and controversially discussed both in scientific literature as well as in public media. An overview of systematic reviews in 2017 (17) illustrates that many of the previous reviews on the safety of acupuncture just summarized case reports or case series. In turn, those reviews including studies that do allow for AE frequency estimation, such as cohort studies and large RCTs, mostly only addressed certain types of AE, particular patient groups, restricted acupuncture regimens, or certain countries. These data are surely important for clinical decision making in particular cases, but leave the overall risk of acupuncture related AE in the general population obscure. Additionally, debate exists about differentiating AE from therapeutically intended reactions that are claimed to form part of the acupuncture treatment. For example, international consensus exists that aggravation of symptoms represents an AE, since disease burden increases, although transient worsening of symptoms followed by long-term improvements can be interpreted as a so called healing crisis in complementary and alternative medicine.(18) In contrast, such consensus is still missing for local reactions such as small bleedings upon needle withdrawal, needling pain, and flare around the needling site. These are also referred to as beneficial signs by acupuncture experts and in standard text books and have been linked to neurophysiological mechanisms of acupuncture, suggesting that quality and intensity of these events should be considered when classifying them as AE.(19-21)

The last review on prospective studies on AE related to acupuncture with high external validity dates back to 2001,(22) did not meta-analytically summarize AE risk estimates and did not assess the quality of included studies. In addition, inconsistency and incompleteness of reporting in primary studies hampered the drawing of firm conclusions on acupuncture safety. Since then various large-scale clinical trials and nationwide surveys on acupuncture safety have been conducted.

Therefore, it was the aim of this review to provide an up to date summary of prospective trials that were particularly designed to evaluate AE related to needle acupuncture with manual or electrical stimulation in combination with or without moxibustion.

## Methods

We systematically reviewed prospective studies that reported on acupuncture related AE. The protocol has been registered at the International prospective register of systematic reviews (PROSPERO) (23) on September 25, 2019 (registration number CRD42020151930; online supplementary appendix S1). The research checklist according to the



1 preferred reporting items for systematic reviews and meta-analyses (PRISMA) (24) and according to the guideline of  
2 Meta-analysis Of Observational Studies in Epidemiology (MOOSE) (25) are displayed in the online supplementary  
3 appendix S2.  
4

#### 5 Search strategy

6 We searched Pubmed, Scopus, and EMBASE for articles published before September 15, 2019 by applying the following  
7 search strategy: 1: acupuncture; 2: "adverse event"; 3:"adverse events"; 4: "adverse effect"; 5: "adverse effects"; #1  
8 AND #2; #1 AND #3; #1 AND #4; #1 AND #5. Additional records were identified from previous reviews on acupuncture  
9 related AE.(17) "Acupuncture" and "adverse effects" are MeSH terms.  
10  
11  
12

#### 13 In- and exclusion criteria

14 We included articles reporting on prospective studies (cohort studies, RCTs, surveys or surveillances) assessing AE  
15 associated with needle acupuncture involving manual or electrical stimulation combined with or without moxibustion  
16 in humans as their primary outcome. Case reports and case series were not included. Only articles published in English  
17 or German were included. Publications on assessments of acupuncture point injection therapies or non-penetrating  
18 acupuncture point stimulation such as laser acupuncture, acupressure or transcutaneous electrical nerve stimulation  
19 (TENS) were excluded. We also excluded articles reporting solely on moxibustion or restricted acupuncture regimens  
20 such as press-needle, auricular or one-point acupuncture. Trials focusing just on one type of acupuncture related AE  
21 or just on a narrowly defined patient population were excluded.  
22  
23  
24  
25  
26

#### 27 Article selection and data extraction

28 Article selection was performed independently by two reviewers (WZ and PB, TS and PB, or LM and PB). Retrieved  
29 records were first screened for eligibility by abstract. Full texts were obtained for the remaining articles. Final decision  
30 about eligibility was obtained by consensus of all four reviewers.  
31  
32

33 Estimates of overall risks and risks for each reported type of AE were extracted as absolute number of patients with  
34 AE per total number of patients and treatments with AE per total number of treatments. Data concerning AE from  
35 sham- or placebo-acupuncture treatments were not extracted. The different types of AE were assigned to one of the  
36 following categories: bleeding, local pain, other local AE, distant pain, central nervous system, peripheral nervous  
37 system, vegetative nervous system, motor system, gastrointestinal / gynaecological system, cardiovascular system,  
38 respiratory system, generalized skin reactions, headache, emotional interference, sleeping problems, AE related to  
39 moxibustion, needling malpractice, aggravation of symptoms, other or unclassified AE (online supplementary  
40 appendix S3).  
41  
42  
43  
44

45 Following the differentiation between AE and adverse drug reactions (ADR) defined by the International Conference  
46 on Harmonization (ICH) of Good Clinical Practice,(26) articles were classified into reports on adverse events  
47 irrespective of their causal relationship to acupuncture and adverse reactions for which a causal relationship was a  
48 reasonable possibility. Serious adverse events (SAE) were reported as indicated in the included articles as in  
49 accordance with the ICH-criteria. These include any untoward medical occurrence that at any dose results in death, is  
50 life-threatening, requires inpatient hospitalization, or prolongation of existing hospitalization, results in persistent or  
51 significant disability / incapacity, or is a congenital anomaly / birth defect.(26) AE definitions and severity assessments  
52 as stated in the included publications are provided in the online supplementary appendix S4. Causality assessment of  
53 SAE was performed by independent acupuncture therapists who were medical doctors who received more than 300  
54 hours of acupuncture training and with more than ten years of intensive acupuncture practice. As the basis of this  
55 assessment was limited to incomplete information provided in the articles lacking e.g. time references, the standard  
56  
57  
58  
59  
60

categories of the WHO-UMC causality assessment system (27) were reduced to possibly or unlikely related to acupuncture or unclassifiable.

AE risk estimates given as patients with AE per total number of patients were interpreted according to the guidelines of the Council for International Organizations of Medical Sciences (CIOMS) as very common ( $\geq 1/10$  patients), common ( $\geq 1/100$  to  $< 1/10$ ), uncommon ( $\geq 1/1,000$  to  $< 1/100$ ), rare ( $\geq 1/10,000$  to  $< 1/1,000$ ), or very rare ( $< 1/10,000$ ).<sup>(28)</sup>

Documentation of study characteristics included study type, country in which the study was conducted, reporter, method and time point of AE assessment, complaint as well as age and gender structure of the study population, average number and frequency of treatments per patient, average number of needles per treatment, needle in time, acupuncture style, and method of needle stimulation, as well as number, gender, training, and years of experience of acupuncturists. Data on patients' and acupuncturists' AE reports from the article published by Weidenhammer et al. in 2008 were handled as two separate trials.

#### Risk of bias assessment

Included studies were assessed for risk of bias according to a checklist developed by Faillie and colleagues for systematic reviews focusing on drug adverse events.<sup>(29)</sup> This checklist is applicable to RCTS, cohort studies, case-control studies, nested case-control studies, and systematic reviews. The questions are structured in 8 risk of bias domains. Possible answers are "Not applicable" (n/a), "Yes" (Y), "Unclear" (U), or "No" (N). A summary risk of bias assessment is provided for each domain as well as for the whole study. According to the inclusion criteria of this review, questions concerning systematic reviews, cross-over trials, and case-control studies were not applicable.

#### Data analysis

Data were analysed using the package meta implemented in R.<sup>(30)</sup> Pooled estimates with 95% confidence intervals (CI) for overall AE risk and risks of different types of AE were obtained from proportion meta-analyses. Random effects models were calculated by the Hartung-Knapp method with arcsine transformation of proportions. Cochran Q test, and  $I^2$  statistics were used to assess the heterogeneity of included studies. Meta-analyses were performed for the overall risks for an AE, for SAE, for AE requiring treatment and the risks for the different types of AE given as the number of patients with AE per total number of patients undergoing an acupuncture series or as the number of treatments with AE per total number of treatments performed. All studies reporting the respective risks were included in the different meta-analyses. All AE that were reported separately in the articles, but that were allocated to the same AE category, were treated as they had occurred in different patients or treatments, respectively. Sensitivity analyses were performed for studies that explicitly only reported about AE that had, at the discretion of the assessors', a causal relationship to acupuncture treatments. None of the articles reported the mean and variance of the number of AE per treatment. Thus, the expected number of AE per treatment could not be estimated by meta-analysis but just by considering the sum of AE relative to the sum of treatments. An additional sensitivity analysis was performed by excluding AE that are usually very mild and transient or are often argued to be part of the treatment or a desired treatment response, such as transient bleeding, needle site pain, or a flare around the needle insertion point. AE of such type that were indicated by any means as significant were not excluded for this sensitivity analysis.

#### Patient and public involvement

No patients were involved in defining the research question, the outcome measures, the design or conduct of this review. No patients were asked to advise on interpretation of results. Authors will share the results during patient seminars and information events. A concise version of the results will be made available for non-profit acupuncture organisations to be presented on their webpages.

## Results

### Study characteristics

7677 records were retrieved from the database search and two were identified from previous reviews on acupuncture related adverse events. 7499 records could be screened by abstract and for 180 articles full-texts were obtained. A total of 22 articles reporting on 21 studies covering 12.9 million treatments met our inclusion criteria (Figure 1).(31-52) In two studies different data assessments on different subpopulations were performed and are treated independently in the present analyses. In one study patient reported AE were assessed after one of the first treatments and three months after treatment,(38, 39) and in one large study AE were documented by therapists and in addition by a subgroup of patients.(46)

Study characteristics are provided in table 1. The four largest trials with one to five hundred thousand patients treated in over 750 thousand acupuncture sessions were cohort studies performed as part of the German Model Projects on Acupuncture (*Modellvorhaben Akupunktur*).(33, 41, 46, 49) Three nationwide surveys from the UK (described in four articles),(38-40, 48) one in-house surveillance report from Japan (51) and one summary of AE assessments nested within three Chinese RCTs (52) included two to six thousand patients receiving over 30 thousand treatments, respectively. In three surveys, two from South-Korea,(44, 45) one from Japan, (35) and one from Brazil,(32) around one to two thousand patients were included and treated in up to 14 thousand acupuncture sessions. One nationwide survey conducted in Sweden reported on the risk of AE based on data from over nine thousand acupuncture sessions.(43) In seven studies less than 500 patients receiving maximum 3.5 thousand treatments were included; four AE assessments nested within RCTS or clinical trials from China,(36, 47) Hong-Kong,(31) and Sweden,(37) one Japanese (50) and one German survey (34) as well as one German cohort study.(42) In most studies acupuncture was used to treat pain in middle aged patients. In six articles no details on the patients' condition were provided.(34, 35, 40, 43, 48, 50) Two articles reported explicitly on short-term AE after one particular treatment only.(39, 45) All but five articles provided sufficient information to infer that acupuncturists had a firm medical background and / or had received intensive acupuncture training.(34, 36, 37, 42, 43) One German survey also included "other practitioners" most likely non-medical practitioners (*Heilpraktiker*) with non-standardized acupuncture training.(34)

Eight articles described AE reported by patients only (31, 32, 37-39, 45, 46, 49) and seven articles AE reported by acupuncturists only.(33, 40, 41, 44, 46, 48, 51) As before said Weidenhammer et al. described therapists' and patients' reports on AE separately.(46) Zhao et al. combined the AE reports from patients and acupuncturists.(52) In five articles it was explicitly stated that acupuncturists recording the AE also queried their patients about any uncomfortable experience during or after treatment.(34-36, 43, 50) In two trials AE were documented by an independent assessor.(42, 47) In eight of the 22 included articles AE were reported irrespective of their relationship to acupuncture,(31, 33, 34, 37, 40, 48, 51, 52) while descriptions of AE assessments in twelve articles suggest that only AE related to the acupuncture treatment were documented,(32, 35, 36, 38, 39, 42-44, 46, 49, 50) and one article did not provide information about the AE definition.(45) Further discrepancies were found in definitions of certain reactions as therapeutically intended. For example, da Silva et al. did not count aggravation of symptoms as AE, because of difficulties in determining causality as well as severity and because of common notion among practitioners that transient worsening forms part of the acupuncture treatment.(32) In contrast White et al. reported observations of aggravated symptoms as AE, but only those that were not followed by substantial improvements.(48) In contrast, the other articles did not specify aggravation of symptoms further.(33-35, 37, 38, 42, 46, 49, 50) In addition, Endres et al. did report on erythema at the needling site (which was accounted for in the present analysis), but did not include it in their overall AE incidence report, as this can also be regarded as desired acupuncture reaction.(33)

| 1 <sup>st</sup> Author year | Country                        | Study type  | Patients                            |                   |                       | Treatments                                                                                                          |                         |                          |                 | Acupuncturists     |                               |                              |                         | AE assessment                   |                        |                                                                   |                                             |
|-----------------------------|--------------------------------|-------------|-------------------------------------|-------------------|-----------------------|---------------------------------------------------------------------------------------------------------------------|-------------------------|--------------------------|-----------------|--------------------|-------------------------------|------------------------------|-------------------------|---------------------------------|------------------------|-------------------------------------------------------------------|---------------------------------------------|
|                             |                                |             | n total (female)                    | Age [a]           | Indication            | n (total)                                                                                                           | n / patient             | n needles                | Stimulation     | n total (n female) | Medical background            | Acupuncture training         | Acupuncture practice    | Reporter                        | Tool                   | Time point                                                        |                                             |
| 1                           | Chung 2015                     | Hong-Kong   | RCT                                 | 59 (46)*          | 49 ± 10*              | Insomnia in major depressive disorder                                                                               | 531                     | 9 / 3 w                  | 14              | EA                 | n.i.                          | TCM doctors                  | n.i.                    | > 3 a                           | P                      | SL & OQ any AE                                                    | after 3rd, 6th, 9th treatment               |
| 2                           | da Silva 2014                  | Brazil      | Cohort monocentric                  | 1157 (n.i.)       | n.i.                  | Musculoskeletal, emotional & respiratory disorders i.a.                                                             | 13,884                  | 12 <sup>#</sup>          | n.i.            | MA                 | n.i.                          | MD                           | in training             | n.i.                            | P                      | SL & OQ AE related to acu.                                        | after each treatment                        |
| 3                           | Endres 2004                    | Germany     | Cohort nationwide private clinics   | 190,924 (130,974) | f: 58 ± 16 m: 55 ± 15 | Chronic headache, LBP or arthrosis (> 6 m)                                                                          | 1.77 M                  | apx. 10 / 4 - 8 w        | n.i.            | n.i.               | 12,000 (n.i.)                 | MD                           | > 140 h                 | n.i.                            | A                      | SL & OQ any AE                                                    | after last treatment                        |
| 4                           | Ernst 2003                     | Germany     | Survey private practices            | 409 (279)         | n.i.                  | n.i.                                                                                                                | 3,535                   | f: 9.0 m: 7.9            | n.i.            | n.i.               | 29 (n.i.)                     | MD & other practitioners     | n.i.                    | n.i.                            | A                      | SL & OQ any AE                                                    | after each treatment; at subsequent visit   |
| 5                           | Furuse 2017                    | Japan       | Survey 8 acupuncture clinics        | 2180 (1288)       | 54 ± 19               | n.i.                                                                                                                | 14,039                  | 6.4 <sup>#</sup>         | n.i.            | MA, EA & Moxa      | 232 (93)                      | Japanese lic. acupuncturists | > 3 a                   | 9 ± 10 a                        | A                      | SL AE related to acu.                                             | after each treatment; at subsequent visit   |
| 6                           | Leung 2009                     | Hong-Kong   | 11 clinical trials (not specified)  | 254 (n.i.)        | n.i.                  | Chronic pain, neurological & urological conditions                                                                  | 2,000                   | n.i.                     | 5 avg.          | MA & EA            | 2 (n.i.)                      | TCM doctors                  | n.i.                    | n.i.                            | A                      | SL AE related to acu.                                             | after each treatment & subsequent visit     |
| 7                           | List 1992                      | Sweden      | RCT monocentric                     | 29 (n.i.)         | median 40**)          | Craniomandibular disorder                                                                                           | apx. 174                | ≥ 6 / 6 - 8 w            | 12 avg.         | MA & EA            | 1 (0)                         | n.i.                         | n.i.                    | n.i.                            | P                      | SL & OQ any AE                                                    | after last treatment                        |
| 8                           | MacPherson 2001                | UK          | Survey nationwide private practices | n.i.              | n.i.                  | n.i.                                                                                                                | 34,407                  | n.i.                     | 1 - 20          | n.i.               | 574 (374)                     | MD & physio-therapists       | 1 - 2 a 11% ≥ 3 a 89%   | < 10 a apx. 60% ≥ 10 a apx. 40% | A                      | SL & OQ any AE                                                    | upon recognition                            |
| 9                           | MacPherson 2004 <sup>A</sup>   | UK          | Survey nationwide private practices | 6,348 (4,821)     | 52 ± 15               | Musculoskeletal, psychological, general, neurological, gynecological, obstetric & respiratory conditions; wellbeing | 30,196                  | 4.8                      | n.i.            | MA & EA            | 638 (406)                     | MD & physio-therapists       | > 3 a                   | < 10 a 58% ≥ 10 a 42%           | P                      | SL & OQ AE related to acu.                                        | 3 m after inclusion                         |
| 10                          | MacPherson 2005 <sup>A</sup>   |             |                                     | 9,408 (6,961)     | 51                    |                                                                                                                     | 9,408                   | 1                        |                 |                    | SL imm. AE AE related to acu. |                              |                         |                                 |                        | After the 1 <sup>st</sup> / one of the 1 <sup>st</sup> treatments |                                             |
| 11                          | Melchart 1998                  | Germany     | Cohort monocentric                  | 121 (88)          | 54 ± 13               | Mainly chronic pain                                                                                                 | apx. 1,200              | 9.9 ± 4.7                | n.i.            | n.i.               | n.i.                          | TCM doctors                  | n.i.                    | n.i.                            | Independent A asking P | SL & FT AE related to acu.                                        | at subsequent visit                         |
| 12                          | Melchart 2004                  | Germany     | Cohort nationwide private clinics   | 97,733 (78,675)   | 55 ± 16               | Chronic headache, osteoarthritis, LBP                                                                               | apx. 760,000            | 7.8 ± 2.4                | 12.6 ± 5.1      | n.i.               | 7050 (n.i.)                   | MD                           | > 140 h (19% > 350 h)   | n.i.                            | A                      | SL & FT AE related to acu.                                        | after last treatment                        |
| 13                          | Odsberg 2001                   | Sweden      | Survey private practices            | n.i.              | n.i.                  | n.i.                                                                                                                | 9,277                   | n.i.                     | n.i.            | MA & EA            | 187 (n.i.)                    | Physio-therapists            | n.i.                    | n.i.                            | A                      | n.i. AE related to acu.                                           | after each treatment                        |
| 14                          | Park 2009                      | South-Korea | Survey two-centred                  | 1,095 (696)       | 58 ± 13               | Stroke, headache, hypertension, dizziness, i.a.                                                                     | 1,095                   | 1                        | n.i.            | n.i.               | 8 (n.i.)                      | Korean medicine doctor       | n.i.                    | >10a                            | P                      | n.i.                                                              | after 1 arbitrary treatment                 |
| 15                          | Park 2010                      | South-Korea | Survey private practices            | 2,226 (n.i.)      | n.i.                  | n.i. (patients with AE mainly pain conditions)                                                                      | 3,071                   | 1.4 / ≤ 5 w <sup>#</sup> | n.i.            | n.i.               | 13 (n.i.)                     | Oriental medicine.           | 6 a                     | < 3a 70% ≥ 3a 30%               | A                      | SL AE related to acu.                                             | upon recognition                            |
| 16                          | Weidenhammer 2008 <sup>B</sup> | Germany     | Cohort nationwide private clinics   | 503,397 (40,5235) | 54 ± 16               | Chronic headache, LBP, osteoarthritis (> 6 m)                                                                       | 4.2 M                   | 8.4 (2.9)                | n.i.            | n.i.               | 9918 (3570)                   | MD                           | 140 h (22% > 350 h)     | n.i.                            | A                      | SL & FT AE related to acu.                                        | after last treatment                        |
| 17                          |                                |             |                                     | 882847 (n.i.)     | n.i.                  |                                                                                                                     | 7.9 M                   | n.i.                     |                 |                    | 7                             |                              |                         |                                 |                        | OO - SAE only AE related to acu.                                  | upon recognition                            |
| 18                          |                                |             |                                     | 5,998 (5,072)     | 55 ± 15               |                                                                                                                     | apx. 51582 <sup>#</sup> | 8.6 (3.0)                |                 |                    | 9429 (n.i.)                   |                              |                         |                                 |                        | OO AE related to acu.                                             | after last treatment                        |
| 19                          | Wen 2016                       | China       | RCT monocentric                     | 120 (84)          | 59 ± 7                | Posterior circulation ischemia                                                                                      | 1,680                   | 14 / 3 - 4 w             | ≤ 9             | MA                 | 1 (n.i.)                      | n.i.                         | n.i.                    | > 20 a                          | Blinded assessor       | n.i. AE related to acu.                                           | after each treatment                        |
| 20                          | White 2001                     | UK          | Survey private practices            | n.i.              | n.i.                  | n.i.                                                                                                                | 31,822                  | n.i.                     | n.i.            | n.i.               | 78 (29)***)                   | MD & physio-therapists       | ≤ 100 h 43% > 100 h 57% | ≤ 10 a 65% > 10 a 35%           | A                      | SL & OQ any AE                                                    | upon recognition                            |
| 21                          | Witt 2009                      | Germany     | Cohort nationwide private clinics   | 229,230 (148,541) | 51 ± 14               | Chronic headache, osteoarthritis, LBP, all. rhinitis, asthma, dysmenorrhoea                                         | 2.2 M                   | 10.2 ± 3.0               | n.i.            | n.i.               | 13579 (5418)                  | MD                           | > 140 h (15% > 350h)    | 6.9 ± 5.3 a                     | P                      | OO AE related to acu.                                             | after last treatment                        |
| 22                          | Yamashita 1999                 | Japan       | In-house surveillance               | 5,008 (2,804)     | Mostly 40 - 50 a      | Musculoskeletal disorder, miscellaneous complaints                                                                  | 65,482                  | 13 avg.                  | n.i.            | MA, EA & Moxa      | 84 (n.i.)                     | Japanese lic. acupuncturists | > 3 a                   | < 1 a 64% ≥ 1 a 36%             | A                      | OO any AE                                                         | upon recognition                            |
| 23                          | Yamashita 2000                 | Japan       | Survey monocentric                  | 391 (n.i.)        | 12 - 88               | n.i.                                                                                                                | 1,441                   | 3.7 <sup>#</sup>         | 21 <sup>#</sup> | MA & EA            | 7 (n.i.)                      | Japanese lic. acupuncturists | > 3 a                   | n.i.                            | A                      | OO AE related to acu.                                             | after each treatment; at subsequent visit   |
| 24                          | Zhao 2011                      | China       | 3 RCTs multicenter                  | 1,968 (1,239)     | 39 ± 14               | Migraine, dyspepsia, Bell's palsy                                                                                   | 39,360                  | 20 / 4 w                 | 2 - 5           | MA & EA            | n.i.                          | TCM doctors                  | ≥ 8 a                   | > 10 a                          | P & A                  | SL & OQ any AE                                                    | after each treatment & after last treatment |

Table 1: Study characteristics

AE: adverse event; SAE: serious adverse event; acu: acupuncture; MA: manual acupuncture; EA: electroacupuncture; Moxa: moxibustion; m: male, f: female; LBP: low back pain; MD: medical doctors; lic.: licensed; TCM: Traditional Chinese Medicine; SL: selection list; OQ: open questions, FT: free text; P: patients; A: acupuncturists; imm.: immediate; X ± X: mean ± standard deviation; a: year; w: weeks; h: hours; M: million; avg.: on average; i.a. inter alia; apx.: approximately; n.i.: not indicated; <sup>A</sup>) overlapping study populations from the same survey <sup>B</sup>) reports of patients and therapists separately presented; \*) including one drop out prior to treatment; \*\*) refers to total study population (n=61); \*\*\*) further professional details only provided by 59 acupuncturists; <sup>#</sup>) approximation based on other reported data

### Risk of bias assessment

1 According to the inclusion criteria the study objective was clearly described in all articles (Figure 2, category A). Study  
2 design was clear for all but one article, which stated that data were collected in the course of 11 clinical trials without  
3 further specification.(36) Also, all but one AE assessment were free of a run in period. In one RCT the safety assessment  
4 was initiated with a short delay.(37) Both irregularities were rated as unlikely to introduce bias into AE documentation.  
5 High risk for selection bias (Figure 2, category B) was identified for the four RCTs and the AE assessment in 11 clinical  
6 trials (23% of articles), due to exclusion of patients with comorbidities or bleeding tendency. In contrast, in all surveys  
7 and cohort studies (77%) the risk for selection bias was rated as unclear due to an indistinct selection of therapists and  
8 / or patients, inclusion of voluntarily participating acupuncturists or acupuncturists from specialized medical centres  
9 only. Furthermore, none of the articles stated that patients were naive to acupuncture. Risk of bias due to study  
10 withdrawal or drop-out (Figure 2, category C) was rated as low for all RCTs and two surveys, that only reported on  
11 short-term AE (27%), (39, 45) and as high for one survey (5%), because treatment was ceased for 40% of patients with  
12 AE.(44) For the remaining studies (68%) the risk of bias due to early treatment termination was rated as unclear, as  
13 withdrawals and drop-outs due to AE were not reported. The risk of information bias regarding the safety outcome  
14 (Figure 2, category D) was rated as high for one study (5%) because of an exclusive documentation of repeatedly  
15 occurring AE (37) and as unclear for all remaining studies (95%). At this, AE reporting by patients or acupuncturists  
16 instead of an independent assessor was classified as an unclear risk for social desirability bias. Using only a selection  
17 list (35, 36, 39, 44) or only open questions as AE assessment tool,(49-51), lack of reporting on the AE assessment tool  
18 (43, 45, 47) or the definition of the safety outcome, and selection of the time-point of the AE assessment (only directly  
19 after treatment,(32, 33, 43, 47) only after the last treatment initiation,(37, 38, 41, 46, 49) solely upon recognition (40,  
20 44, 48, 51)) were rated as possible but unclear sources of detection bias. Further risk of information bias (Figure 2,  
21 category E) appeared to be unclear due to poor reporting of treatment details in all but seven studies (32%).(31, 37,  
22 40, 41, 47, 50, 52) Bias arising from differential care, confounder assessment and statistical methods to control for  
23 confounding (Figure 2, category F) was rated as low, as crude AE risk estimates and not relative risks with respect to a  
24 comparator group were extracted. The risk of bias due to other statistical methods (Figure 2, category G) was also  
25 rated as low, as reporting of AE incidence was clear and well-structured in all articles.

26 Bias due to conflict of interest (Figure 2, category H) might be present in four articles (18%) due to funding by  
27 institution with direct interest in the public acknowledgement of acupuncture.(38, 39, 43, 44) In eight articles (36%)  
28 funding or other conflicts of interest were not described.(34, 36, 37, 40, 42, 48, 50, 51) The ten remaining articles  
29 (45%) included an explicit statement about funding by independent institutions and absence of other conflicts of  
30 interest. For all studies the overall risk of bias was rated as unclear based on the large proportion of unclear sources  
31 of bias.

### Overall risk of acupuncture related adverse events

32 Eleven studies including 845,637 patients that assessed the overall AE risk as patients with AE among the total number  
33 of patients undergoing an acupuncture series were combined in a meta-analysis. The overall risk for at least one AE  
34 during a series of acupuncture treatments was estimated to be 9.31 (95%-CI 5.10 to 14.62) per 100 patients treated  
35 (Figure 3A). (31, 34, 36, 38, 41, 42, 46, 47, 49, 52) The median number of treatments per patient was 9 (min 4.8; max  
36 14), and the total number of treatments exceeded 7.4 million. Visual inspection neither indicated an association of the  
37 incidence of AE with the number of treatments per acupuncture series nor with the study type (online supplementary  
38 appendix S5). Five studies reported the total number of acupuncture treatments with AE relative to the total number  
39 of treatments performed.(32, 34, 36, 40, 42) Meta-analysis of these studies covering 55,026 treatments in total



1 resulted in a risk of 7.57 (95%-CI 1.43 to 17.95) treatments with AE per 100 treatments (Figure 3B). Sensitivity analysis  
 2 of studies reporting on adverse acupuncture reactions and not on AE irrespective of their relationship to acupuncture  
 3 treatments resulted in similar estimates (32, 36, 38, 40, 41, 46, 47, 49); 8.23 (95%-CI 6.42 to 10.25) patients with at  
 4 least one AE out of 100 patients (Figure 3C) and 6.08 (95%-CI 0.00 to 38.76) treatment with AE out of 100 treatments  
 5 (Figure 3D). Heterogeneity for all meta-analyses mentioned above (including the sensitivity analyses) was substantial  
 6 as indicated by an  $I^2$  between 98% and 100% ( $p < 0.01$ ).  
 7  
 8

9 Thirteen articles reported the incidences of different types of AE per treatment (table 2).(32, 34-36, 39, 40, 42-45, 48,  
 10 50, 51) The average number of AE per 100 treatments varied between 0.14 and 69.12. In total 18,002 AE were reported  
 11 in of 190,661 treatments, which makes on average 9.44 AE per 100 treatments. Exclusion of AE that are usually mild  
 12 and transient or are often argued to be part of the treatment or a desired treatment response, such as transient  
 13 bleeding, needle site pain, or a flare around the needle insertion point, reduced this number to 4.81 (min - max 0.10  
 14 – 36.92) AE per 100 treatments.  
 15  
 16  
 17

| Study           | Number of treatments | Number of AE |                                  | AE incidence per 100 treatments |                                  | Bleeding, pain, flare at needling site as % of all AE |
|-----------------|----------------------|--------------|----------------------------------|---------------------------------|----------------------------------|-------------------------------------------------------|
|                 |                      | total        | excluding bleeding, pain & flare | total                           | excluding bleeding, pain & flare |                                                       |
| Park 2009       | 1095                 | 193          | 64                               | 17.63                           | 5.84                             | 66.84%                                                |
| Ernst 2003      | 3535                 | 632          | 403                              | 17.88                           | 11.40                            | 36.23%                                                |
| Melchart 1998   | 1200                 | 120          | 66                               | 10.00                           | 5.50                             | 45.00%                                                |
| Yamashita 1999  | 65482                | 94           | 67                               | 0.14                            | 0.10                             | 28.72%                                                |
| Yamashita 2000  | 1441                 | 996          | 114                              | 69.12                           | 7.91                             | 88.55%                                                |
| MacPherson 2001 | 34407                | 4544         | 3406                             | 13.21                           | 9.90                             | 25.04%                                                |
| Odsberg 2001    | 9277                 | 2108         | 390                              | 22.72                           | 4.20                             | 81.50%                                                |
| White 2001      | 31822                | 2176         | 820                              | 6.84                            | 2.58                             | 62.32%                                                |
| MacPherson 2005 | 9408                 | 5071         | 3473                             | 53.90                           | 36.92                            | 31.51%                                                |
| Leung 2009      | 2000                 | 8            | 0                                | 0.40                            | 0.00                             | 100.00%                                               |
| Park 2010       | 3071                 | 99           | 26                               | 3.22                            | 0.85                             | 73.74%                                                |
| da Silva 2014   | 13884                | 1107         | 117                              | 7.97                            | 0.84                             | 89.43%                                                |
| Furuse 2017     | 14039                | 854          | 232                              | 6.08                            | 1.65                             | 72.83%                                                |
| <b>Overall</b>  | <b>190661</b>        | <b>18002</b> | <b>9178</b>                      | <b>9.44</b>                     | <b>4.81</b>                      | <b>49.02%</b>                                         |

18  
19  
20  
21  
22  
23  
24  
25  
26  
27  
28  
29  
30  
31  
32  
33  
34  
35  
36  
37  
38  
39  
40  
41  
42  
43  
44  
45  
46  
47  
48  
49  
50  
51  
52  
53  
54  
55  
56  
57  
58  
59  
60  
61  
62  
63  
64  
65  
66  
67  
68  
69  
70  
71  
72  
73  
74  
75  
76  
77  
78  
79  
80  
81  
82  
83  
84  
85  
86  
87  
88  
89  
90  
91  
92  
93  
94  
95  
96  
97  
98  
99  
100  
101  
102  
103  
104  
105  
106  
107  
108  
109  
110  
111  
112  
113  
114  
115  
116  
117  
118  
119  
120  
121  
122  
123  
124  
125  
126  
127  
128  
129  
130  
131  
132  
133  
134  
135  
136  
137  
138  
139  
140  
141  
142  
143  
144  
145  
146  
147  
148  
149  
150  
151  
152  
153  
154  
155  
156  
157  
158  
159  
160  
161  
162  
163  
164  
165  
166  
167  
168  
169  
170  
171  
172  
173  
174  
175  
176  
177  
178  
179  
180  
181  
182  
183  
184  
185  
186  
187  
188  
189  
190  
191  
192  
193  
194  
195  
196  
197  
198  
199  
200  
201  
202  
203  
204  
205  
206  
207  
208  
209  
210  
211  
212  
213  
214  
215  
216  
217  
218  
219  
220  
221  
222  
223  
224  
225  
226  
227  
228  
229  
230  
231  
232  
233  
234  
235  
236  
237  
238  
239  
240  
241  
242  
243  
244  
245  
246  
247  
248  
249  
250  
251  
252  
253  
254  
255  
256  
257  
258  
259  
260  
261  
262  
263  
264  
265  
266  
267  
268  
269  
270  
271  
272  
273  
274  
275  
276  
277  
278  
279  
280  
281  
282  
283  
284  
285  
286  
287  
288  
289  
290  
291  
292  
293  
294  
295  
296  
297  
298  
299  
300  
301  
302  
303  
304  
305  
306  
307  
308  
309  
310  
311  
312  
313  
314  
315  
316  
317  
318  
319  
320  
321  
322  
323  
324  
325  
326  
327  
328  
329  
330  
331  
332  
333  
334  
335  
336  
337  
338  
339  
340  
341  
342  
343  
344  
345  
346  
347  
348  
349  
350  
351  
352  
353  
354  
355  
356  
357  
358  
359  
360  
361  
362  
363  
364  
365  
366  
367  
368  
369  
370  
371  
372  
373  
374  
375  
376  
377  
378  
379  
380  
381  
382  
383  
384  
385  
386  
387  
388  
389  
390  
391  
392  
393  
394  
395  
396  
397  
398  
399  
400  
401  
402  
403  
404  
405  
406  
407  
408  
409  
410  
411  
412  
413  
414  
415  
416  
417  
418  
419  
420  
421  
422  
423  
424  
425  
426  
427  
428  
429  
430  
431  
432  
433  
434  
435  
436  
437  
438  
439  
440  
441  
442  
443  
444  
445  
446  
447  
448  
449  
450  
451  
452  
453  
454  
455  
456  
457  
458  
459  
460  
461  
462  
463  
464  
465  
466  
467  
468  
469  
470  
471  
472  
473  
474  
475  
476  
477  
478  
479  
480  
481  
482  
483  
484  
485  
486  
487  
488  
489  
490  
491  
492  
493  
494  
495  
496  
497  
498  
499  
500  
501  
502  
503  
504  
505  
506  
507  
508  
509  
510  
511  
512  
513  
514  
515  
516  
517  
518  
519  
520  
521  
522  
523  
524  
525  
526  
527  
528  
529  
530  
531  
532  
533  
534  
535  
536  
537  
538  
539  
540  
541  
542  
543  
544  
545  
546  
547  
548  
549  
550  
551  
552  
553  
554  
555  
556  
557  
558  
559  
560  
561  
562  
563  
564  
565  
566  
567  
568  
569  
570  
571  
572  
573  
574  
575  
576  
577  
578  
579  
580  
581  
582  
583  
584  
585  
586  
587  
588  
589  
590  
591  
592  
593  
594  
595  
596  
597  
598  
599  
600  
601  
602  
603  
604  
605  
606  
607  
608  
609  
610  
611  
612  
613  
614  
615  
616  
617  
618  
619  
620  
621  
622  
623  
624  
625  
626  
627  
628  
629  
630  
631  
632  
633  
634  
635  
636  
637  
638  
639  
640  
641  
642  
643  
644  
645  
646  
647  
648  
649  
650  
651  
652  
653  
654  
655  
656  
657  
658  
659  
660  
661  
662  
663  
664  
665  
666  
667  
668  
669  
670  
671  
672  
673  
674  
675  
676  
677  
678  
679  
680  
681  
682  
683  
684  
685  
686  
687  
688  
689  
690  
691  
692  
693  
694  
695  
696  
697  
698  
699  
700  
701  
702  
703  
704  
705  
706  
707  
708  
709  
710  
711  
712  
713  
714  
715  
716  
717  
718  
719  
720  
721  
722  
723  
724  
725  
726  
727  
728  
729  
730  
731  
732  
733  
734  
735  
736  
737  
738  
739  
740  
741  
742  
743  
744  
745  
746  
747  
748  
749  
750  
751  
752  
753  
754  
755  
756  
757  
758  
759  
760  
761  
762  
763  
764  
765  
766  
767  
768  
769  
770  
771  
772  
773  
774  
775  
776  
777  
778  
779  
780  
781  
782  
783  
784  
785  
786  
787  
788  
789  
790  
791  
792  
793  
794  
795  
796  
797  
798  
799  
800  
801  
802  
803  
804  
805  
806  
807  
808  
809  
810  
811  
812  
813  
814  
815  
816  
817  
818  
819  
820  
821  
822  
823  
824  
825  
826  
827  
828  
829  
830  
831  
832  
833  
834  
835  
836  
837  
838  
839  
840  
841  
842  
843  
844  
845  
846  
847  
848  
849  
850  
851  
852  
853  
854  
855  
856  
857  
858  
859  
860  
861  
862  
863  
864  
865  
866  
867  
868  
869  
870  
871  
872  
873  
874  
875  
876  
877  
878  
879  
880  
881  
882  
883  
884  
885  
886  
887  
888  
889  
890  
891  
892  
893  
894  
895  
896  
897  
898  
899  
900  
901  
902  
903  
904  
905  
906  
907  
908  
909  
910  
911  
912  
913  
914  
915  
916  
917  
918  
919  
920  
921  
922  
923  
924  
925  
926  
927  
928  
929  
930  
931  
932  
933  
934  
935  
936  
937  
938  
939  
940  
941  
942  
943  
944  
945  
946  
947  
948  
949  
950  
951  
952  
953  
954  
955  
956  
957  
958  
959  
960  
961  
962  
963  
964  
965  
966  
967  
968  
969  
970  
971  
972  
973  
974  
975  
976  
977  
978  
979  
980  
981  
982  
983  
984  
985  
986  
987  
988  
989  
990  
991  
992  
993  
994  
995  
996  
997  
998  
999  
1000

### Serious acupuncture related adverse events

SAE were observed in five studies including 1,182,860 patients undergoing 10,570,678 treatments with incidences between two and 40 SAE in 100,000 patients undergoing a treatment series and between two and 99 in one million treatments, respectively.(33, 38, 41, 46, 51) Four articles reported that none of the AE observed in a total of 1,922 patients undergoing 19,005 treatments required medical treatment,(32, 36, 47, 50) and authors of five articles concluded that none of the AE observed in 122,699 treatments fulfilled the ICH-criteria for SAE.(35, 40, 44, 48, 52) Eight articles did not mention SAE or any AE description that allowed for inferences on SAE.(31, 34, 37, 39, 42, 43, 45, 49)

Meta-analyses of the overall risk for a SAE resulted in 1.01 (95%-CI 0.23 to 2.33) patients with SAE in 10,000 patients undergoing an acupuncture series (Figure 4A, 11 studies 1,188,930 patients) and 7.98 (95%-CI 1.39 to 20.00) SAE in one million treatments (Figure 4B, 14 studies 10,712,382 treatments). Exclusion of studies with zero SAE incidences

changed these estimates to 1.47 (95%-CI 0.10 to 4.46) in 10,000 patients suffering from a SAE when undergoing an acupuncture series and 16.90 (95%-CI 0.49 to 56.60) in one million treatments causing an SAE. Sensitivity analyses of studies that only reported reactions with a plausible relationship to acupuncture resulted in risk estimates of 0.45 (95%-CI 0.06. to 1.18) SAE per 10,000 patients (Figure 4C) and 5.45 (95%-CI 0.50 to 15.67) per one million treatments (Figure 4D). Again, heterogeneity between studies included in these two meta-analyses was substantial ( $I^2 > 85\%$ ,  $p < 0.001$ ).

The causality assessment of the 73 SAE conducted by two acupuncture experts (table 3) resulted in 32 SAE (44%) being possibly related to acupuncture. Among those, pneumothorax, strong cardiovascular or vasovagal reactions, and fall or trauma were the most frequent SAE with a frequency of 1 to 3 cases in one million treatments each. One article that was not taken into account in the SAE meta-analyses as observed AE were not categorized in minor AE and SAE also reported two cases of pneumothorax in over 200,000 patients receiving on average 10 acupuncture treatments.(49) One of the included trials documented deaths occurring in the study population. Nineteen SAE (26%) were rate as unlikely related to acupuncture. Among those were nine deaths observed in one study in patients of an age between 67 and 87 years and related to a pre-existing health conditions.(33) Authors reported that the resulting death rate of 4.71 per 100,000 patients is below the expected death rate derived from population statistics. Other SAE classified as unlikely related to acupuncture were a circulatory reaction with amnesia, suicidal tendencies, acute general infection, a car crash two days after treatment, a malignant parotid tumour, tonic-clonic seizures, and an ophistotonus. Twenty-two SAE (30%), intervertebral disk prolapses and hospitalizations due to pain exacerbation or unknown reasons, were rated as “unclassifiable”.

| <b>Endres 2004</b>                                                                             | <b>Causality</b> | <b>n</b> | <b>Melchart 2004</b>                                                                                                         | <b>Causality</b> | <b>n</b> |
|------------------------------------------------------------------------------------------------|------------------|----------|------------------------------------------------------------------------------------------------------------------------------|------------------|----------|
| - Death                                                                                        | unlikely         | 9        | - Exacerbation of depression                                                                                                 | possible         | 1        |
| - Fall or trauma, with or without fracture                                                     | possible         | 4        | - Hypertensive crisis                                                                                                        | possible         | 1        |
| - Acute general infection with hospitalization                                                 | unlikely         | 2        | - Vasovagal reaction                                                                                                         | possible         | 1        |
| - Allergic reaction to concomitant medication (atopy)                                          | possible         | 1        | - Asthma attack with hypertension and angina                                                                                 | possible         | 1        |
| - Stroke with hospitalization                                                                  | unlikely         | 3        | - Pneumothorax                                                                                                               | possible         | 2        |
| - Cardiovascular problems (hospital admission)                                                 | possible         | 3        | <b>Yamashita 1999</b>                                                                                                        | <b>Causality</b> | <b>n</b> |
| - Intervertebral disk prolapse, pain exacerbation with hospital admission                      | unclassifiable   | 5        | - Hospitalization of patient with asthma because of coughing                                                                 | possible         | 1        |
| - Malignant parotid tumor (hospital admission)                                                 | unlikely         | 1        | - 1 case of deep burn that recovered after 2 years                                                                           | possible         | 1        |
| - Hospitalization (unknown reasons)                                                            | unclassifiable   | 17       |                                                                                                                              |                  |          |
| <b>Weidenhammer 2008 ther.</b>                                                                 | <b>Causality</b> | <b>n</b> | <b>MacPherson 2004</b>                                                                                                       | <b>Causality</b> | <b>n</b> |
| - Pneumothorax                                                                                 | possible         | 5        | - Low back pain in breast cancer patient, hospital admission, disappeared without medication, since then no more LBP         | possible         | 1        |
| - Suicidiation in a patient with borderline syndrome                                           | unlikely         | 1        | - Car crash 2d after acupuncture, very little sleep the night before                                                         | unlikely         | 1        |
| - Hypertensive crisis                                                                          | possible         | 1        | - Skin rash and feeling ill for several weeks accompanied by decrease of ME symptoms and feeling of catharsis (no treatment) | possible         | 1        |
| - Syncope (vasovagal reaction)                                                                 | possible         | 2        |                                                                                                                              |                  |          |
| - Asthma attack in a patient with asthma                                                       | possible         | 1        |                                                                                                                              |                  |          |
| - Erysipelas (one in a patient with lymphedema)                                                | possible         | 2        |                                                                                                                              |                  |          |
| - Circulatory collapse (one with uncontrolled defecation and one with vertigo and paresthesia) | possible         | 2        |                                                                                                                              |                  |          |
| - Circulatory reaction with amnesia                                                            | unlikely         | 1        |                                                                                                                              |                  |          |
| - Tonic-clonic seizures and ophistotonus                                                       | unlikely         | 1        |                                                                                                                              |                  |          |
| - Infection of the knee joint with E. coli bacteria                                            | possible         | 1        |                                                                                                                              |                  |          |

**Table 3: Causality assessment of serious adverse events as reported in included articles**

The total number of serious adverse events (SAE) as well as the total number of treatments in each study can be identified from figure 4.



### Acupuncture related adverse events requiring treatment

Eight studies determining the number of patients with AE requiring treatment during an acupuncture series included 1,211,791 patients. The meta-analysis of these studies yielded a summary estimate of 1.14 (95%-CI 0.00 to 7.37) in 1000 patients for the risk to suffer from an AE that required treatment when undergoing an acupuncture series (Figure 5). (31, 32, 36, 41, 46, 47, 49, 50) Also here, heterogeneity was substantial ( $I^2$  100%). Two articles, that had defined required treatment as an SAE criterion, reported lower incidences (2 and 6 events per 100,000 patients) (41, 46) than other two articles, reporting on AE requiring treatment without referring to SAE (1.7 and 2.2 in 100 patients).(31, 49)

### Risk of different types of minor adverse events

Overall risk for the different types of minor AE (categorization see online supplementary appendix S3) were estimated in separated meta-analyses as patients with AE per total number of patients undergoing a treatment series or as treatments with AE per total number of treatments (Table 4). Risks estimated in single studies (online supplementary appendix S6 and S7) varied largely for all types of minor AE. Most frequent and commonly occurring minor AE with summary risk estimated between one and five percent of patients undergoing an acupuncture series were bleeding events, pain at the needling site, other local AE, vegetative reactions, aggravation of symptoms, and events related to the central nervous system. Summary risk estimates for bleeding events, needle site pain, vegetative reactions, and aggravation of symptoms also ranged from 1% to 5% of treatments, while meta-analysis of symptoms related to the central nervous system per acupuncture treatment resulted in a risk of two in 1000 treatments. AE estimated to be uncommon with summary risk estimates of one to seven out of 1000 patients undergoing an acupuncture series were symptoms of the peripheral nervous system, pain distant to the needling site, gastrointestinal or gynaecological symptoms, headache, cardiovascular symptoms, affection of the motor system, generalized skin reactions, adverse emotional reactions, and sleeping problems. Symptoms affecting the peripheral nervous system, distant pain, as well as gastrointestinal or gynaecological symptoms were estimated to occur in one to seven out of 1000 treatments; headache, cardiovascular, and motor symptoms as well as adverse emotional reactions only in one to eight out of 10,000 treatments. The risk for respiratory AE was estimated to be rare with a summary risk estimate of four out of 10,000 patients undergoing an acupuncture series and three out of 10,000 treatments. Summary risk estimates for AE caused by therapists' malpractice and burns caused by moxibustion were between one and two in 1000 patients undergoing an acupuncture series and between two in 10,000 to one in 1000 treatments, respectively.

Some of the studies showed outlying incidences for particular types of minor AE. List et al. observed at least one vegetative reaction in the course of an acupuncture series for craniomandibular disorder in over half of the patients (58.6%),(37) and MacPherson et al. reported vegetative reactions after over a quarter of treatments (27.9%).(39) These findings exceed the frequency of vegetative reactions of up to 13.6% of patients identified in the remaining studies and was mainly based on patient reports of abnormal tiredness after treatment. List et al. also report the highest incidence of aggravation of symptoms with 93% of CMD patients as well as the highest frequency of needle site pain with 44.8 % of patients. This was followed by an RCT with 32.2% of patients suffering needle site pain (31) and a cohort study among chronic pain patients of which 10% suffered aggravation of symptoms after receiving acupuncture.(42) The remaining 19 articles reported incidences smaller than 3% for aggravation of symptoms and 14% for needle site pain.

| Type of AE                               | Number of studies | Sum of patients | Risk as patients with AE per 100 patients [95%-CI] |                      |                         | Tau <sup>2</sup><br>I <sup>2</sup> | Number of studies | Sum of treatments | Risk as treatments with AE per 100 treatments [95%-CI] |                      |                         | Tau <sup>2</sup><br>I <sup>2</sup> |
|------------------------------------------|-------------------|-----------------|----------------------------------------------------|----------------------|-------------------------|------------------------------------|-------------------|-------------------|--------------------------------------------------------|----------------------|-------------------------|------------------------------------|
|                                          |                   |                 | overall                                            | min                  | max                     |                                    |                   |                   | overall                                                | min                  | max                     |                                    |
| Bleeding                                 | 13                | 1038741         | 4.67<br>[2.08; 8.22]                               | 0.48<br>[0.32; 0.67] | 25.18<br>[21.10; 29.50] | 0.0008<br>99.4%**                  | 13                | 190661            | 4.92<br>[1.18; 11.01]                                  | 0.03<br>[0.02; 0.05] | 45.45<br>[42.89; 48.03] | 0.0169<br>99.9%**                  |
| Needle site pain                         | 14                | 1038907         | 3.75<br>[0.74; 8.94]                               | 0.05<br>[0.04; 0.06] | 44.83<br>[27.46; 62.87] | 0.0085<br>99.9%**                  | 12                | 188661            | 2.43<br>[0.63; 5.35]                                   | 0.01<br>[0.00; 0.02] | 15.75<br>[13.92; 17.68] | 0.0095<br>99.8%**                  |
| Other local AE                           | 10                | 1034610         | 2.79<br>[0.02; 10.01]                              | 0.15<br>[0.14; 0.16] | 35.59<br>[23.97; 48.14] | 0.0494<br>100.0%*<br>*             | 11                | 187566            | 0.13<br>[0.04; 0.27]                                   | 0.00<br>[0.00; 0.01] | 0.90<br>[0.48; 1.46]    | 0.0004<br>96.4%**                  |
| Vegetative reaction                      | 12                | 1036607         | 1.95<br>[0.40; 4.63]                               | 0.08<br>[0.07; 0.08] | 58.62<br>[40.52; 75.59] | 0.0012<br>99.7%**                  | 12                | 188661            | 2.24<br>[0.21; 6.35]                                   | 0.00<br>[0.00; 0.01] | 27.87<br>[26.97; 28.78] | 0.0213<br>99.9%**                  |
| Aggravation of symptoms                  | 11                | 1036760         | 1.48<br>[0.00; 5.90]                               | 0.08<br>[0.07; 0.09] | 93.10<br>[81.26; 99.30] | 0.0017<br>99.8%**                  | 10                | 173682            | 0.84<br>[0.26; 1.75]                                   | 0.00<br>[0.00; 0.01] | 2.83<br>[2.66; 3.01]    | 0.0055<br>99.7%**                  |
| Central nervous system                   | 9                 | 244553          | 1.45<br>[0.07; 4.51]                               | 0.05<br>[0.00; 0.20] | 37.93<br>[21.45; 55.99] | 0.0018<br>96.3%**                  | 11                | 179253            | 0.20<br>[0.05; 0.46]                                   | 0.01<br>[0.00; 0.02] | 1.08<br>[0.76; 1.44]    | 0.0011<br>98.4%**                  |
| Peripheral nervous system                | 8                 | 433118          | 0.69<br>[0.02; 2.34]                               | 0.08<br>[0.07; 0.10] | 27.59<br>[13.14; 44.96] | 0.0004<br>98.1%**                  | 10                | 152813            | 0.19<br>[0.02; 0.55]                                   | 0.00<br>[0.00; 0.01] | 1.46<br>[0.84; 2.26]    | 0.0008<br>98.0%**                  |
| Distant pain                             | 5                 | 241817          | 0.60<br>[0.21; 1.20]                               | 0.17<br>[0.09; 0.29] | 0.95<br>[0.72; 1.21]    | 0.0005<br>92.6%**                  | 4                 | 46456             | 0.73<br>[0.00; 5.02]                                   | 0.07<br>[0.00; 0.27] | 4.49<br>[4.08; 4.91]    | 0.0085<br>99.5%**                  |
| Gastrointestinal / gynaecological system | 9                 | 747559          | 0.60<br>[0.04; 1.81]                               | 0.01<br>[0.01; 0.02] | 17.24<br>[5.94; 32.83]  | 0.0008<br>99.3%**                  | 10                | 186125            | 0.15<br>[0.03; 0.38]                                   | 0.01<br>[0.00; 0.02] | 1.18<br>[0.97; 1.41]    | 0.0008<br>98.2%**                  |
| Unclassified AE                          | 10                | 1036307         | 0.57<br>[0.01; 1.95]                               | 0.07<br>[0.05; 0.08] | 17.85<br>[14.29; 21.70] | 0.0003<br>99.0%**                  | 9                 | 172136            | 0.47<br>[0.03; 1.46]                                   | 0.00<br>[0.00; 0.01] | 5.46<br>[4.74; 6.23]    | 0.0025<br>99.4%**                  |
| Headache                                 | 9                 | 845745          | 0.51<br>[0.03; 1.55]                               | 0.03<br>[0.03; 0.04] | 13.56<br>[6.10; 23.38]  | 0.0012<br>99.6%**                  | 7                 | 97592             | 0.04<br>[0.01; 0.10]                                   | 0.00<br>[0.00; 0.01] | 1.14<br>[0.01; 0.40]    | 0.0002<br>90.3%**                  |
| Cardiovascular system                    | 5                 | 739155          | 0.40<br>[0.24; 0.61]                               | 0.27<br>[0.25; 0.29] | 0.83<br>[0.00; 3.21]    | 0.0001<br>96.4%**                  | 3                 | 18774             | 0.03<br>[0.00; 0.13]                                   | 0.01<br>[0.00; 0.04] | 0.08<br>[0.00; 0.33]    | 0.0001<br>21.2%                    |
| Motor system                             | 5                 | 237634          | 0.38<br>[0.00; 4.79]                               | 0.08<br>[0.07; 0.09] | 41.38<br>[24.41; 59.48] | 0.0011<br>94.6%**                  | 5                 | 82112             | 0.01<br>[0.00; 0.04]                                   | 0.00<br>[0.00; 0.01] | 0.03<br>[0.00; 0.11]    | 0.0001<br>58.1%*                   |
| Generalized skin reaction                | 2                 | 229289          | 0.35<br>[0.00; 35.67]                              | 0.09<br>[0.08; 0.10] | 1.69<br>[0.00; 6.52]    | 0.0029<br>58.2%                    | -                 | -                 | -                                                      | -                    | -                       | -                                  |
| Needling malpractice                     | 7                 | 1029871         | 0.22<br>[0.01; 0.67]                               | 0.00<br>[0.00; 0.00] | 1.04<br>[0.81; 1.30]    | 0.0009<br>99.7%**                  | 7                 | 164146            | 0.12<br>[0.02; 0.28]                                   | 0.01<br>[0.00; 0.02] | 0.62<br>[0.28; 1.10]    | 0.0002<br>95.1%**                  |
| Emotional interference                   | 6                 | 930429          | 0.20<br>[0.00; 0.81]                               | 0.02<br>[0.02; 0.02] | 1.24<br>[0.99; 1.53]    | 0.0002<br>98.7%**                  | 7                 | 155131            | 0.08<br>[0.00; 0.27]                                   | 0.01<br>[0.00; 0.02] | 0.67<br>[0.51; 0.84]    | 0.0004<br>96.8%**                  |
| Sleeping problems                        | 5                 | 432529          | 0.16<br>[0.00; 0.91]                               | 0.04<br>[0.03; 0.05] | 20.69<br>[8.19; 37.03]  | 0.0001<br>97.1%**                  | -                 | -                 | -                                                      | -                    | -                       | -                                  |
| AE caused by moxibustion                 | 4                 | 428682          | 0.14<br>[0.00; 1.16]                               | 0.00<br>[0.00; 0.00] | 0.96<br>[0.60; 1.42]    | 0.0002<br>98.3%**                  | 4                 | 145750            | 0.02<br>[0.00; 0.18]                                   | 0.00<br>[0.00; 0.01] | 0.17<br>[0.11; 0.25]    | 0.0001<br>95.0%**                  |
| Respiratory system                       | 3                 | 235637          | 0.04<br>[0.00; 0.26]                               | 0.02<br>[0.01; 0.02] | 0.24<br>[0.00; 0.96]    | 0.0001<br>69.0%*                   | 1                 | 3535              | 0.03<br>[0.00; 0.11]                                   | -                    | -                       | -                                  |

Table 4: Summary risk estimated for different types of adverse events

Summary risk estimates of adverse events (AE) derived from random effects meta-analyses; min: minimum; max: maximum; 95%-CI: 95% confidence interval \*: p-value of Q-test for heterogeneity < 0.05; \*\*: p-value of Q-test < 0.00

## Discussion

### Overall risk for acupuncture related adverse events

To date this is the first systematic review on prospective studies that provides summary risk estimates for acupuncture related adverse events derived from meta-analyses. The obtained results suggest that AE can be expected in every tenth patient that undergoes a series of acupuncture treatments and, overall, in every 13<sup>th</sup> treatment. Minor AE were common and represented the large majority of reported AE. About half of the reported minor AE are usually mild and transient or might even be regarded as part of the acupuncture treatment or therapeutically intended reactions (bleeding, needle site pain, flare around the needle site).(21) SAE can be expected rarely in about every 10,000<sup>th</sup> patient in the course of an acupuncture series and, overall, in every 125,000<sup>th</sup> treatment. Sensitivity analyses excluding studies with zero SAE incidences still suggest SAE being rare (every 7000<sup>th</sup> patient and every 60,000<sup>th</sup> treatment) particularly in comparison to SAE risk associated with pharmacological treatments.(16, 53, 54) AE requiring treatment occur uncommonly in about every 900<sup>th</sup> treatment, but additional AE are likely to also have involved medical decision-making about further diagnostics and follow-up. With meta-analyses for the overall risk of acupuncture related AE covering over 845,637 patients undergoing more than 7.4 million treatments and for the risk of SAE covering more than 1.2 million patients and 10.6 million treatments, the amount of data is equivalent to such available on the safety of e.g. common analgesics.(55, 56) This work augments insights on acupuncture related adverse events from previous reviews with either narrow eligibility criteria or focussing on case reports.(17) It includes data from the largest and most rigorous trials on acupuncture safety e.g. from the large nationwide cohort studies conducted in the UK and Germany which had not yet been aggregated.(33, 38-41, 46, 48, 49) Thus, our results provide rigorous support for the previously drawn conclusion (22, 57, 58) that acupuncture is among the safe treatments in medicine with SAE occurring rarely and half of the common minor AE being mild and transient. The uncommon AE requiring treatment necessitate solid medical competence of acupuncturists.

### Types of adverse events related to acupuncture and implications for medical education of acupuncturists

Common minor AE were bleeding, needle site pain, other local reactions at the needling site, vegetative reactions, aggravation of symptoms, and AE related to the central nervous system (one to five out of 100 patients). This is in line with other reviews (22, 59) also on auricular (60) and paediatric acupuncture.(58) All other types of minor AE can be regarded as uncommon (1 to 7 out of 1000 patients), despite respiratory reactions that occurred very rarely (4 out of 10,000 patients). SAE most often reported were pneumothorax, strong cardiovascular or vasovagal reactions, and fall or trauma with one to three cases in one million treatments. Several other sometimes fatal SAE repeatedly described in case reports were not observed in the included studies; e.g. traumatic injuries of inner organs, local and systemic infections, subarachnoid bleeding, infective endocarditis, and cardiac tamponade.(61-65) This is likely due to the fact that acupuncturists in most of the studies were well trained, as SAE are claimed to be avoidable by proper acupuncture training and practice. Concordantly, cases of acupuncture malpractice were uncommon in the included trials.

### Heterogeneity between studies

Possible causes of the substantial heterogeneity observed in all meta-analyses are differences in patient populations, needling regimens, AE definition, and AE assessment. Sensitivity analyses of trials reporting on adverse reactions with a plausible relationship to acupuncture resulted in only marginally lower overall AE risk estimates, but in a 50% lower SAE risk per patient and a 30% lower SAE risk per treatment. Reporting of SAE irrespective of the relationship to acupuncture is surely more conservative but likely to cause risk overestimation. In line with this, the causality of more than half of the SAE was rated as unlikely or unclassifiable by two independent acupuncture experts.

1 The variety of combinations of further patient treatment and assessment related factors prevented meaningful  
2 subgrouping of studies for additional sensitivity analyses, and the likeliness of their contribution to the observed  
3 heterogeneity makes formal assessment for publication bias unadvisable.(66) However, some distinct observations  
4 are worth to be discussed. Certain patient populations might be at higher risk to experience acupuncture related AE;  
5 e.g. in one study conducted among CMD patients AE were prominently frequent.(37) The role of acupuncture regimens  
6 in explaining heterogeneity could not be determined due to the limited information about number, location, and  
7 stimulation of needles. In contrast, the number of treatments per acupuncture series and study type seemed not to  
8 have impacted reported AE incidences.

9  
10  
11  
12 A further possible cause of heterogeneity are differences in contrasting AE from therapeutically intended reactions  
13 that form part of acupuncture treatment; e.g. in contrast to international consensus, (18) aggravated symptoms were  
14 not or only in part counted as AE in two studies. (32, 48) Local reactions such as bleeding, pain, and flare at the needling  
15 site that represented half of the AE reported and are referred to as beneficial signs in standard acupuncture textbooks  
16 and by authors themselves.(20, 33) As the principle of acupuncture is to induce endogenous anti-nociceptive  
17 mechanisms and anti-inflammatory humoral responses through micro-trauma of skin and tissue, it can be argued that  
18 moderate local reactions are indeed desired reactions indicating an induction of regulative processes. Mild pain and a  
19 flare at the needling site have been linked to important neurophysiological mechanisms of acupuncture.(21)  
20 Additionally, aching or soreness at the needling site might be part of the intended deqi sensation (propagated  
21 sensation along the channels) supposedly related to acupuncture effectiveness.(19) The loss of small drops of blood  
22 upon needle withdrawal is interpreted as a sign for the patient's constitution called "excess" or "excess heat" in TCM  
23 terminology and was suggested not to be interpreted as AE.(67) On the other hand, standard text books explicitly  
24 explain needling techniques avoiding pain and bleeding.(20, 68) This debate calls for a uniform internationally  
25 recognized consensus on the definition of local acupuncture reactions as AE e.g. according to their quality and  
26 intensity.

27  
28  
29  
30  
31  
32  
33  
34 In addition, included studies differed in reporters (acupuncturists, patients, acupuncturists also questioning patients,  
35 and independent assessors), the type of documentation (selection list, open questions, or a combination of both), and  
36 assessment time points. Due to the large variability of combinations the individual impact of these factors could not  
37 be estimated, but literature suggests that patients report more AE than therapists,(69) and that open questions  
38 presented to patients lead to lower risk estimates than the presentation of a selection list of possible AE.(31) Thus,  
39 standardized AE assessment methods should be established for acupuncture studies.

#### 40 Risk of bias in included studies

41  
42  
43  
44  
45 Although, large prospective studies are among the most important sources of safety data, they come with the known  
46 risk for information, selection, and confounding bias.(70) Risk of information bias was mostly related to poor reporting  
47 of acupuncture regimens and the discrepancies in AE definition and assessment. This is in line with the shortcoming  
48 identified for reporting of AE in acupuncture randomized controlled trials.(71) Possible causes of selection bias  
49 identified were mainly voluntary participation of practitioners, unsystematic patient selection, and study conductance  
50 in highly specialized institutions. Practical reasons make these causes of selection bias inherent to safety studies. They,  
51 however, are unlikely to importantly impair external validity, considering the large number of patients and treatments,  
52 the variety of countries in which studies were conducted, and the inclusion of different study designs. Future large  
53 scale comparative safety studies along with modern statistical methods for confounder adjustment could be used to  
54 contrast AE risks related acupuncture to AE risks associated with other treatments and to identify patient and  
55 treatment characteristics associated with AE in real world clinical settings.(72)

### Limitations

1  
2 First, it is debatable whether studies should be summarized irrespective of whether AE not necessarily related to  
3 acupuncture or adverse reactions likely caused by acupuncture were reported. Another limitation with regard to the  
4 inclusion criteria is the restriction to articles published in German or English as many studies on acupuncture are  
5 published in Chinese. In order to provide the most comprehensive information possible respective sensitivity analyses  
6 were conducted. Additionally, the risk estimates for the different types of minor adverse events are likely to be slightly  
7 overestimated and should be interpreted as a rough indication that allows to distinguish frequent from less frequent  
8 acupuncture related minor AE. In categorizing the minor AE it was disregarded that several different AE falling in one  
9 category could have occurred in the same patient or during the same treatment. Also, calculations of risks in  
10 treatments with AE per total number of treatments could not adjust for the fact that multiple AE assessments in the  
11 same patient are not independent. Furthermore, zero incidences of certain types of AE were not available. Finally, the  
12 causality assessment presented for SAE is limited to expert opinions and is only based on the information provided in  
13 the respective article. Such an evaluation does not replace a rigorous causality assessment that would involve querying  
14 patients and therapists.

### Clinical implications

21  
22  
23 Patients should be informed that acupuncture commonly causes minor AE, but rarely SAE. Examples for SAE should at  
24 least cover the most frequent ones, pneumothorax and strong cardiovascular or vasovagal reactions potentially  
25 leading to fall or trauma, along with the respective incidence of 1-3 per million treatments. Patients should also be  
26 made aware of the fact that great part of the minor AE are either very mild or even intended effects that indicate a  
27 beneficial physiological reactions. However, they should be encouraged to report any prolonged discomfort or pain  
28 that are to be avoided during treatment. Acupuncturists should carefully balance treatment intensity according to  
29 patients' reactions in order to minimize AE. They should assess local AE upon needle withdrawal and query patients  
30 about AE directly after treatment as well as at the subsequent visit. Therapists should be aware that, although  
31 uncommon, AE requiring treatment can be expected and necessitate medical decision making. Medical competence  
32 is also required for the indication of acupuncture in patients at high risk for AE or those in which AE could lead to  
33 particular aversive outcomes such as pregnant women, elderly and patients with cardiovascular comorbidities. In  
34 these patients acupuncture can be especially beneficial, as conventional treatments e.g. with analgesics are often  
35 limited by side effects or drug interactions, but selection of acupuncture regimens needs to involve careful risk-benefit  
36 considerations. These medical competences required to provide optimal patient safety should also be reflected by  
37 acupuncture education standards and regulations. At this policy makers should take into account the worldwide  
38 popularity of acupuncture which is likely to further increase as its scientific level of evidence has led to more than 4000  
39 practice guidelines recommending acupuncture for different mostly pain indications.(69)

### **Conclusion**

48  
49  
50 Acupuncture can be considered among the safer treatments in medicine. It rarely causes SAE and the majority of the  
51 common minor AE are very mild. AE requiring medical management are uncommon. For optimal patient safety  
52 acupuncture education standards regulations should reflect that solid medical competence of acupuncturists is  
53 required to manage AE properly and to minimize the risk of malpractice. Clinical and methodological heterogeneity  
54 calls for an international consensus on AE assessment tools in acupuncture studies and criteria for differentiating  
55 acupuncture related AE from therapeutically desired reactions as well as identification of patient related risk factors  
56 for acupuncture related AE. In particular, comparative safety studies are needed to contrast acupuncture to standard  
57 care in its main indications.

## Figure legends

### Figure 1: Flow diagram

Designed according to the preferred reporting items for systematic reviews and meta-analyses (PRISMA)(24)

### Figure 2: Risk of bias assessment

Risk of bias assessment was conducted according to Faillie et al.(29) L – green: low risk of bias, U – yellow: unclear risk of bias, H – red: high risk of bias

### Figure 3: Meta-analyses of the overall risk for acupuncture related adverse events

Summary risk estimates for adverse events (AE) were calculated as the number of patients or treatments with at least one AE relative to the total number of patients or treatments, respectively. Data on AE reports of patients (pat.) and therapists (ther.) from the article published by Weidenhammer et al. in 2008 were handled separately.

### Figure 4: Meta-analyses of the overall risk for serious adverse events related to acupuncture

Summary risk estimates for serious adverse events (SAE) were calculated as the number SAE cases relative to the total number of patients or treatments, respectively. Data from the article published by Weidenhammer et al. in 2008 refer to the AE reports of the therapists (ther.).

### Figure 5: Meta-analyses of the overall risk for adverse events (AE) requiring treatment

Summary risk estimates for AE requiring treatment were calculated as the number of patients with such AE relative to the total number of patients.



## Acknowledgements

We thank Mrs. Luise Möhring and Dr. Barbara Jopen-Wolff from the Multidisciplinary Pain Center, Department for Anaesthesiology, University Hospital LMU Munich. Mrs. Möhring assisted in article screening and Mrs. Dr. Jopen-Wolff participated in the causality assessment. The contribution of Mrs. Wenyue Zhang during the planning phase was made possible by the support of the China Scholarship Council (CSC) of the LMU Munich.

## Funding

No funding was received for the conduct of this work.

## Competing interests

All authors have completed the ICMJE uniform disclosure form at [http://www.icmje.org/coi\\_disclosure.pdf](http://www.icmje.org/coi_disclosure.pdf) and declare: no support from any organisation for the submitted work; no financial relationships with any organisations that might have an interest in the submitted work in the previous three years. DI reports to receive honorarium and travel costs from non-profit academic organizations, physician chambers and universities for teaching and lecturing and to serve as president of the German Medical Acupuncture Association (Deutsche Ärztgesellschaft für Akupunktur, DÄGfA, a non-profit medical associations). PB declares to receive honorarium and travel costs from non-profit academic organizations and universities for teaching and lecturing and to be member of the scientific advisory board of the DÄGfA. WZ and TS declare: no other relationships or activities that could appear to have influenced the submitted work.

## Authors' contributions

DI, PB and WZ defined the research question as well as in and exclusion criteria for this systematic review. WZ, TS and PB were responsible for article screening, data extraction and classifications of adverse events. TS and PB performed the quality assessment. Questions and discrepancies were discussed among all authors until consent was achieved. PB conducted the meta-analyses and designed table and figures. All authors contributed to drafting the manuscript and approved its final version for publication.

The corresponding author (PB) attests that all listed authors meet authorship criteria and that no others meeting the criteria have been omitted. As the senior author, DI is the guarantor of the work presented in this manuscript. DI accepts full responsibility for the finished article, has access to any data and controlled the decision to publish

## Transparency declaration

The lead author DI affirms that this manuscript is an honest, accurate, and transparent account of the study being reported; that no important aspects of the study have been omitted; and that the review and analyses were conducted as planned.

## Ethical approval

As our work represents an analysis of already published data, approval by an ethics committee was not required.

## Data sharing

The full set of extracted data and the R-code underlying the meta-analyses are available from the corresponding and senior author (Petra.Baeumler@med.uni-muenchen.de, Dominik.Irnich@med.uni-muenchen.de).



## Dissemination to participants and related patient and public communities

1  
2 Authors plan to disseminate the findings of this review to patients, clinicians, policy makers and the general public  
3 through various channels including newsletters, newspapers and magazines. In special regard to patient information,  
4 results will be shared during patient seminars and information events, and a concise version of the results will be made  
5 available for non-profit acupuncture organisations to be presented on their webpages.  
6  
7

## Trial registration

8  
9 PROSPERO registration number CRD42020151930. To enable PROSPERO to focus on COVID-19 registrations during the  
10 2020 pandemic, this registration record was automatically published exactly as submitted. It has not been checked for  
11 eligibility or for sense by the PROSPERO team.  
12  
13  
14  
15  
16  
17  
18  
19  
20  
21  
22  
23  
24  
25  
26  
27  
28  
29  
30  
31  
32  
33  
34  
35  
36  
37  
38  
39  
40  
41  
42  
43  
44  
45  
46  
47  
48  
49  
50  
51  
52  
53  
54  
55  
56  
57  
58  
59  
60

For peer review only

## References

1. Ammon K, Cardini F, Daig U, Dragan S, Frei-Erb M, Hegyi G, et al. Final Report of CAMbrella Work Package 5 - Helath Technology Assessment (HTA) and a map of CAM provision in the EU. CAMbrella - A pan-European research network for Complementary and Alternative Medicine (CAM); 2013 [updated 17.09.2013]. 14]. Available from: <https://phaidra.univie.ac.at/view/o:300096>.
2. British Acupuncture Council. Acupuncture practitioners in the UK 2016 [updated 2016]. Available from: <https://www.acupuncture.org.uk/public-content/about-the-bacc/4115-acupuncture-practitioners-in-the-uk.html>.
3. Cui J, Wang S, Ren J, Zhang J, Jing J. Use of acupuncture in the USA: changes over a decade (2002-2012). *Acupuncture in medicine : journal of the British Medical Acupuncture Society*. 2017;35(3):200-7.
4. Vickers AJ, Vertosick EA, Lewith G, MacPherson H, Foster NE, Sherman KJ, et al. Acupuncture for Chronic Pain: Update of an Individual Patient Data Meta-Analysis. *J Pain*. 2018;19(5):455-74.
5. Linde K, Allais G, Brinkhaus B, Fei Y, Mehring M, Vertosick EA, et al. Acupuncture for the prevention of episodic migraine. *Cochrane Database Syst Rev*. 2016(6):Cd001218.
6. Linde K, Allais G, Brinkhaus B, Fei Y, Mehring M, Shin BC, et al. Acupuncture for the prevention of tension-type headache. *Cochrane Database Syst Rev*. 2016;4:Cd007587.
7. Tedesco D, Gori D, Desai KR, Asch S, Carroll IR, Curtin C, et al. Drug-Free Interventions to Reduce Pain or Opioid Consumption After Total Knee Arthroplasty: A Systematic Review and Meta-analysis. *JAMA surgery*. 2017;152(10):e172872.
8. Sun Y, Gan TJ, Dubose JW, Habib AS. Acupuncture and related techniques for postoperative pain: a systematic review of randomized controlled trials. *British journal of anaesthesia*. 2008;101(2):151-60.
9. Lee A, Chan SK, Fan LT. Stimulation of the wrist acupuncture point PC6 for preventing postoperative nausea and vomiting. *Cochrane Database Syst Rev*. 2015(11):Cd003281.
10. Feng S, Han M, Fan Y, Yang G, Liao Z, Liao W, et al. Acupuncture for the treatment of allergic rhinitis: a systematic review and meta-analysis. *American journal of rhinology & allergy*. 2015;29(1):57-62.
11. Yang A, Wu HM, Tang JL, Xu L, Yang M, Liu GJ. Acupuncture for stroke rehabilitation. *Cochrane Database Syst Rev*. 2016(8):Cd004131.
12. Smith CA, Armour M, Lee MS, Wang LQ, Hay PJ. Acupuncture for depression. *Cochrane Database Syst Rev*. 2018;3:Cd004046.
13. Hershman DL, Unger JM, Greenlee H, Capodice JL, Lew DL, Darke AK, et al. Effect of Acupuncture vs Sham Acupuncture or Waitlist Control on Joint Pain Related to Aromatase Inhibitors Among Women With Early-Stage Breast Cancer: A Randomized Clinical Trial. *JAMA*. 2018;320(2):167-76.
14. Brinkhaus B, Roll S, Jena S, Icke K, Adam D, Binting S, et al. Acupuncture in Patients with Allergic Asthma: A Randomized Pragmatic Trial. *J Altern Complem Med*. 2017;23(4):268-77.
15. Whiskey E, Taylor D. A review of the adverse effects and safety of noradrenergic antidepressants. *Journal of psychopharmacology (Oxford, England)*. 2013;27(8):732-9.
16. Carter GT, Duong V, Ho S, Ngo KC, Greer CL, Weeks DL. Side effects of commonly prescribed analgesic medications. *Physical medicine and rehabilitation clinics of North America*. 2014;25(2):457-70.
17. Chan MWC, Wu XY, Wu JCY, Wong SYS, Chung VCH. Safety of Acupuncture: Overview of Systematic Reviews. *Sci Rep*. 2017;7(1):3369.
18. White A, Boon H, Alraek T, Lewith G, Liu JP, Norheim AJ, et al. Reducing the risk of complementary and alternative medicine (CAM):Challenges and priorities. *Eur J Integr Med*. 2014;6(4):404-8.
19. Ren YL, Guo TP, Du HB, Zheng HB, Ma TT, Fang L, et al. A survey of the practice and perspectives of chinese acupuncturists on deqi. *Evidence-based complementary and alternative medicine : eCAM*. 2015;2015:684708.
20. Shanghai College of Traditional Medicine. *Acupuncture - a comprehensive text*. Seattle, USA: Eastland Press; 1981.
21. Zhu H. Acupoints Initiate the Healing Process. *Medical acupuncture*. 2014;26(5):264-70.
22. Ernst E, White AR. Prospective studies of the safety of acupuncture: a systematic review. *Am J Med*. 2001;110(6):481-5.
23. University of York Y, UK. International prospective register of systematic reviews (PROSPERO). Available from: <https://www.crd.york.ac.uk/prospero>.
24. Moher D, Liberati A, Tetzlaff J, Altman DG. Preferred reporting items for systematic reviews and meta-analyses: the PRISMA statement. *J Clin Epidemiol*. 2009;62(10):1006-12.

25. Stroup DF, Berlin JA, Morton SC, Olkin I, Williamson GD, Rennie D, et al. Meta-analysis of observational studies in epidemiology: a proposal for reporting. Meta-analysis Of Observational Studies in Epidemiology (MOOSE) group. *Jama*. 2000;283(15):2008-12.
26. European Medicines Agency. Guideline for good clinical practice E6(R2). 2016. Available from: [https://www.ema.europa.eu/en/documents/scientific-guideline/ich-e-6-r2-guideline-good-clinical-practice-step-5\\_en.pdf](https://www.ema.europa.eu/en/documents/scientific-guideline/ich-e-6-r2-guideline-good-clinical-practice-step-5_en.pdf).
27. the UPPSLA MONITORING CENTRE. WHO-UMC system for standardised case causality assessment. 2013. Available from: <https://www.who.int/publications/m/item/WHO-causality-assessment>.
28. Council for International organizations of medical sciences - CIOMS. Guidelines for Preparing Core Clinical-Safety Information on Drugs Second Edition – Report of CIOMS Working Groups III and V. 1999. Available from: <https://cioms.ch/shop/product/guidelines-preparing-core-clinical-safety-information-drugs-second-edition-report-cioms-working-groups-iii-v/>.
29. Faillie JL, Ferrer P, Gouverneur A, Driot D, Berkemeyer S, Vidal X, et al. A new risk of bias checklist applicable to randomized trials, observational studies, and systematic reviews was developed and validated to be used for systematic reviews focusing on drug adverse events. *J Clin Epidemiol*. 2017;86:168-75.
30. Schwarzer G. meta: {A}n {R} package for meta-analysis. *R News*. 2007;7(3):40-5.
31. Chung KF, Yeung WF, Yu YM, Kwok CW, Zhang SP, Zhang ZJ. Adverse Events Related to Acupuncture: Development and Testing of a Rating Scale. *Clin J Pain*. 2015;31(10):922-8.
32. da Silva JBG, Saidah R, Megid CBC, Ramos NA. Adverse events following acupuncture: A prospective survey of 13,884 consultations in a university out-patient acupuncture training clinic in Brazil. *Eur J Integr Med*. 2014;6(4):488-91.
33. Endres HG, Molsberger A, Lungenhausen M, Trampisch HJ. An internal standard for verifying the accuracy of serious adverse event reporting: the example of an acupuncture study of 190,924 patients. *Eur J Med Res*. 2004;9(12):545-51.
34. Ernst G, Strzyz H, Hagmeister H. Incidence of adverse effects during acupuncture therapy—a multicentre survey. *Complementary therapies in medicine*. 2003;11(2):93-7.
35. Furuse N, Shinbara H, Uehara A, Sugawara M, Yamazaki T, Hosaka M, et al. A Multicenter Prospective Survey of Adverse Events Associated with Acupuncture and Moxibustion in Japan. *Medical acupuncture*. 2017;29(3):155-62.
36. Leung PC, Zhang L, Cheng KF. Acupuncture: Complications are preventable not adverse events. *Chin J Integr Med*. 2009;15(3):229-32.
37. List T, Helkimo M. Adverse events of acupuncture and occlusal splint therapy in the treatment of craniomandibular disorders. *CRANIO*. 1992;10(4):318-26.
38. MacPherson H, Scullion A, Thomas KJ, Walters S. Patient reports of adverse events associated with acupuncture treatment: A prospective national survey. *Qual Saf Health Care*. 2004;13(5):349-55.
39. MacPherson H, Thomas K. Short term reactions to acupuncture—a cross-sectional survey of patient reports. *Acupuncture in medicine : journal of the British Medical Acupuncture Society*. 2005;23(3):112-20.
40. MacPherson H, Thomas K, Walters S, Fitter M. A prospective of adverse events and treatment reactions following 34,000 consultations with professional acupuncturist. *Acupuncture in medicine : journal of the British Medical Acupuncture Society*. 2001;19(2):93-102.
41. Melchart D, Weidenhammer W, Streng A, Reitmayr S, Hoppe A, Ernst E, et al. Prospective Investigation of Adverse Effects of Acupuncture in 97 733 Patients. *Arch Intern Med*. 2004;164(1):104-5.
42. Melchart DV, Hager S, Weidenhammer W, Liao JZ, Liu Y, Linde K. Adverse effects and concomitant symptoms associated with acupuncture treatment - A pilot study. *Akupunktur*. 1998;26(2):87-92.
43. Odsberg A, Schill U, Haker E. Acupuncture treatment: side effects and complications reported by Swedish physiotherapists. *Complementary therapies in medicine*. 2001;9(1):17-20.
44. Park JE, Lee MS, Choi JY, Kim BY, Choi SM. Adverse events associated with acupuncture: A prospective survey. *J Altern Complem Med*. 2010;16(9):959-63.
45. Park SU, Ko CN, Bae HS, Jung WS, Moon SK, Cho KH, et al. Short-term reactions to acupuncture treatment and adverse events following acupuncture: A cross-sectional survey of patient reports in Korea. *J Altern Complem Med*. 2009;15(12):1275-83.
46. Weidenhammer W, Streng A, Melchart D, Linde K. Unerwünschte Wirkungen und Komplikationen bei Akupunkturbehandlung: Ergebnisse der großen Beobachtungsstudie im Rahmen des Modellvorhabens der Ersatzkassen. *Dtsch Zeitschrift für Akupunkt*. 2008;51(3):6-14.
47. Wen Y, Zhang C, Zhao XF, Deng SZ, He S, Huang LH, et al. Safety of different acupuncture manipulations for posterior circulation ischemia with vertigo. *Neural Regen Res*. 2016;11(8):1267-73.

48. White A, Hayhoe S, Hart A, Ernst E. Survey of adverse events following acupuncture (SAFA): A prospective study of 32,000 consultations. *Acupuncture in medicine : journal of the British Medical Acupuncture Society*. 2001;19(2):84-92.
49. Witt CM, Pach D, Brinkhaus B, Wruck K, Tag B, Mank S, et al. Safety of acupuncture: Results of a prospective observational study with 229,230 patients and introduction of a medical information and consent form. *Forsch Komplementmed*. 2009;16(2):91-7.
50. Yamashita H, Tsukayama H, Hori N, Kimura T, Tanno Y. Incidence of adverse reactions associated with acupuncture. *J Altern Complem Med*. 2000;6(4):345-50.
51. Yamashita H, Tsukayama H, Tanno Y, Nishijo K. Adverse events in acupuncture and moxibustion treatment: A six-year survey at a national Clinic in Japan. *J Altern Complem Med*. 1999;5(3):229-36.
52. Zhao L, Zhang FW, Li Y, Wu X, Zheng H, Cheng LH, et al. Adverse events associated with acupuncture: Three multicentre randomized controlled trials of 1968 cases in China. *Trials*. 2011;12:no pagination.
53. Degner D, Grohmann R, Kropp S, Ruther E, Bender S, Engel RR, et al. Severe adverse drug reactions of antidepressants: results of the German multicenter drug surveillance program AMSP. *Pharmacopsychiatry*. 2004;37 Suppl 1:S39-45.
54. Singh G. Gastrointestinal complications of prescription and over-the-counter nonsteroidal anti-inflammatory drugs: a view from the ARAMIS database. *Arthritis, Rheumatism, and Aging Medical Information System. American journal of therapeutics*. 2000;7(2):115-21.
55. Trelle S, Reichenbach S, Wandel S, Hildebrand P, Tschannen B, Villiger PM, et al. Cardiovascular safety of non-steroidal anti-inflammatory drugs: network meta-analysis. *Bmj*. 2011;342:c7086.
56. Martin Arias LH, Martin Gonzalez A, Sanz Fadrique R, Salgueiro Vazquez E. Gastrointestinal safety of coxibs: systematic review and meta-analysis of observational studies on selective inhibitors of cyclo-oxygenase 2. *Fundamental & clinical pharmacology*. 2018.
57. Wang C, Tan B, Williams A. Safety and side effects of acupuncture therapy in Australia: A systematic review. *Eur J Integr Med*. 2019.
58. Adams D, Cheng F, Jou H, Aung S, Yasui Y, Vohra S. The safety of pediatric acupuncture: a systematic review. *Pediatrics*. 2011;128(6):e1575-87.
59. Wang CC, Tan JY, Williams A. Safety and side effects of acupuncture therapy in Australia: A systematic review. *Eur J Integr Med*. 2019;27:81-9.
60. Tan JY, Molassiotis A, Wang T, Suen LK. Adverse events of auricular therapy: a systematic review. *Evid Based Complement Alternat Med*. 2014;2014:506758.
61. Zhang J, Shang H, Gao X, Ernst E. Acupuncture-related adverse events: a systematic review of the Chinese literature. *Bull World Health Organ*. 2010;88(12):915-21C.
62. Xu S, Wang L, Cooper E, Zhang M, Manheimer E, Berman B, et al. Adverse events of acupuncture: a systematic review of case reports. *Evid Based Complement Alternat Med*. 2013;2013:581203.
63. He W, Zhao X, Li Y, Xi Q, Guo Y. Adverse events following acupuncture: a systematic review of the Chinese literature for the years 1956-2010. *J Altern Complem Med*. 2012;18(10):892-901.
64. Ernst E, Lee MS, Choi TY. Acupuncture: does it alleviate pain and are there serious risks? A review of reviews. *Pain*. 2011;152(4):755-64.
65. Ullah W, Ahmad A, Mukhtar M, Virk HUH, Sarwar U, Figueredo V. Acupuncture-Related Cardiac Complications: A Systematic Review. *J Invasive Cardiol*. 2019;31(4):E69-E72.
66. Lau J, Ioannidis JP, Terrin N, Schmid CH, Olkin I. The case of the misleading funnel plot. *BMJ*. 2006;333(7568):597-600.
67. Zhu HZ. *Running a Safe and Successful Acupuncture Clinic*. Edinburgh, London, New York, Oxford, Philadelphia, St Louis, Sydney, Toronto: Elsevier - Churchill Livingstone; 2006.
68. Deng L, Gan Y, He S, Ji X, Y. L, Wang R, et al. *Chinese Acupuncture and Moxibustion*. 2nd ed. Beijing, China: Foreign Languages Press; 1999.
69. Schwaneberg T, Witt CM, Roll S, Pach D. Comparing physicians' and patients' reporting on adverse reactions in randomized trials on acupuncture-a secondary data analysis. *BMC Complement Alternat Med*. 2019;19(1):223.
70. Suissa S. Statistical methods in pharmacoepidemiology: advances and challenges. *Stat Methods Med Res*. 2009;18(1):3-6.
71. Capili B, Anastasi JK, Geiger JN. Adverse event reporting in acupuncture clinical trials focusing on pain. *Clin J Pain*. 2010;26(1):43-8.
72. Desai RJ, Franklin JM. Alternative approaches for confounding adjustment in observational studies using weighting based on the propensity score: a primer for practitioners. *Bmj*. 2019;367:l5657.

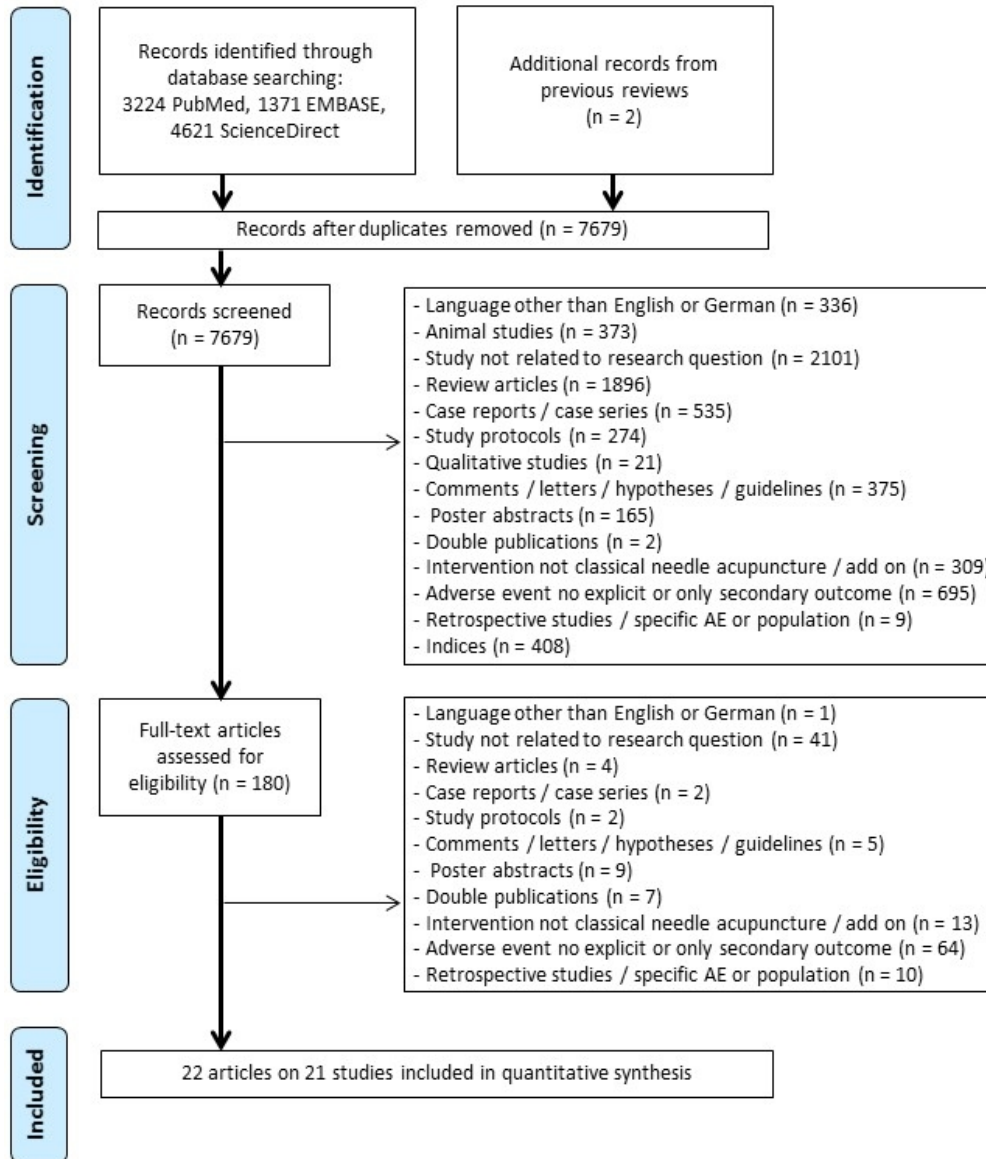

170x200mm (96 x 96 DPI)



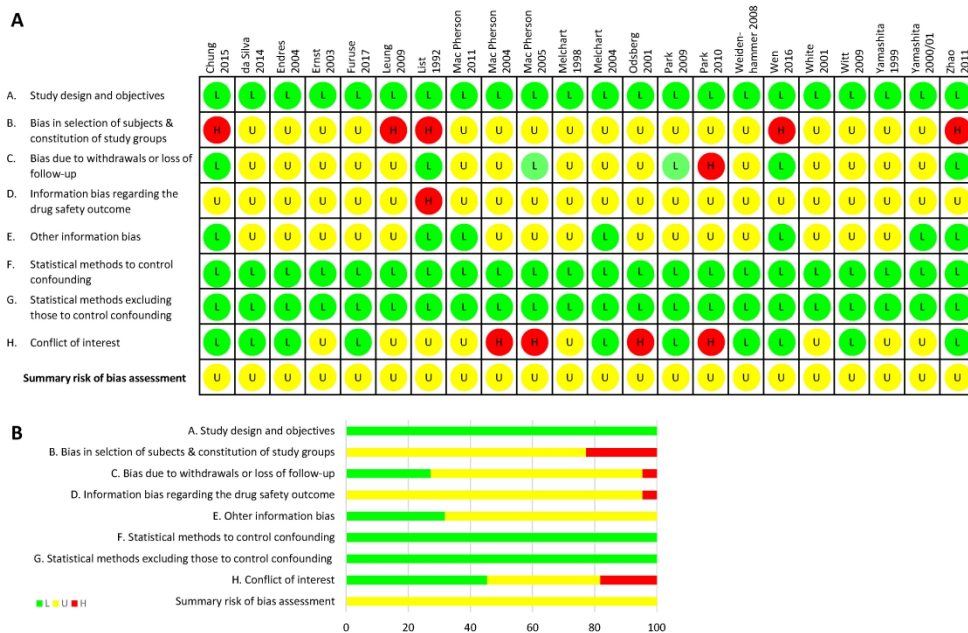

419x297mm (200 x 200 DPI)

**A Overall AE risk among patients undergoing an acupuncture series**



**B Overall AE risk per acupuncture treatment**



**C Overall risk for AE related to acupuncture among patients undergoing a treatment series**



**D Overall risk for AE related to acupuncture per treatment**



180x210mm (276 x 276 DPI)



**A Overall SAE risk among patients undergoing an acupuncture series**

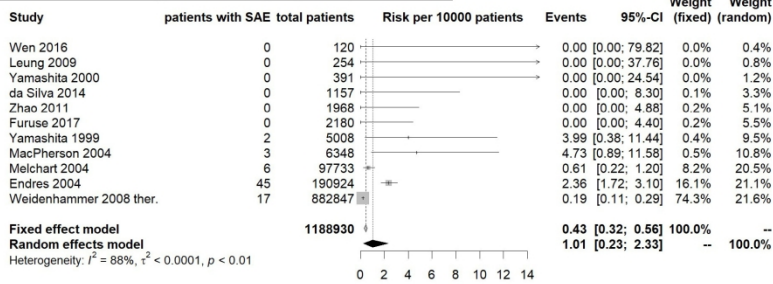

**B Overall SAE risk per acupuncture treatment**

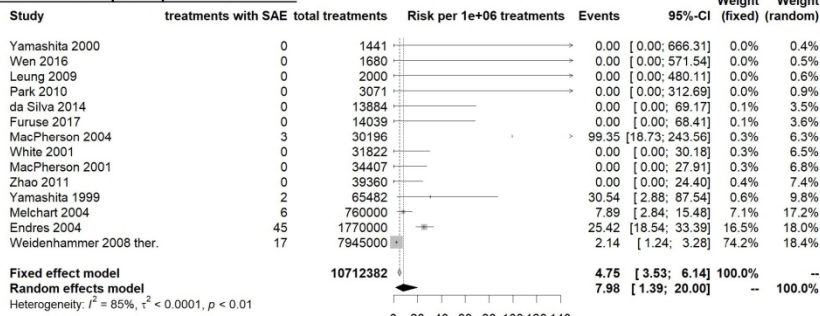

**C Overall risk for SAE related to acupuncture among patients undergoing a treatment series**

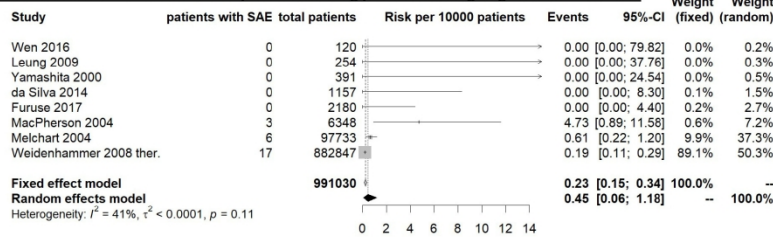

**D Overall risk for SAE related to acupuncture per treatment**

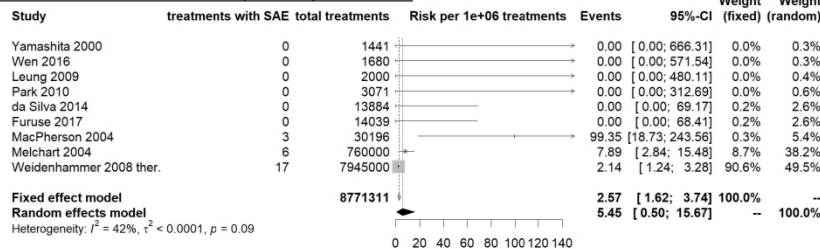

185x257mm (281 x 281 DPI)



286x82mm (180 x 180 DPI)

**PROSPERO**  
International prospective register of systematic reviews

UNIVERSITY *of* York  
Centre for Reviews and Dissemination

## Systematic review

### 1. \* Review title.

Give the title of the review in English

Acupuncture related adverse events - a systematic review of prospective clinical trials

### 2. Original language title.

For reviews in languages other than English, give the title in the original language. This will be displayed with the English language title.

English

### 3. \* Anticipated or actual start date.

Give the date the systematic review started or is expected to start.

19/09/2019

### 4. \* Anticipated completion date.

Give the date by which the review is expected to be completed.

31/12/2019

### 5. \* Stage of review at time of this submission.

Tick the boxes to show which review tasks have been started and which have been completed. Update this field each time any amendments are made to a published record.

**Reviews that have started data extraction (at the time of initial submission) are not eligible for inclusion in PROSPERO.** If there is later evidence that incorrect status and/or completion date has been supplied, the published PROSPERO record will be marked as retracted.

This field uses answers to initial screening questions. It cannot be edited until after registration.

The review has not yet started: No

| Review stage                                                    | Started | Completed |
|-----------------------------------------------------------------|---------|-----------|
| Preliminary searches                                            | Yes     | No        |
| Piloting of the study selection process                         | Yes     | No        |
| Formal screening of search results against eligibility criteria | Yes     | No        |
| Data extraction                                                 | No      | No        |
| Risk of bias (quality) assessment                               | No      | No        |
| Data analysis                                                   | No      | No        |

## PROSPERO

### International prospective register of systematic reviews

Provide any other relevant information about the stage of the review here.

Piloting of the study selection process

Piloting of the study selection process

#### 6. \* Named contact.

The named contact is the guarantor for the accuracy of the information in the register record. This may be any member of the review team.

Dr. Petra Bäumlér

#### Email salutation (e.g. "Dr Smith" or "Joanne") for correspondence:

Petra

#### 7. \* Named contact email.

Give the electronic email address of the named contact.

Petra.Baeumler@med.uni-muenchen.de

#### 8. Named contact address

Give the full institutional/organisational postal address for the named contact.

Dr. Petra Bäumlér

Multidisciplinary Pain Center, Department of Anaesthesiology, University Hospital LMU Munich

Pettenkoférstr. 8a

80336 Munich, Germany

#### 9. Named contact phone number.

Give the telephone number for the named contact, including international dialling code.

0049-89-4400-53625

#### 10. \* Organisational affiliation of the review.

Full title of the organisational affiliations for this review and website address if available. This field may be completed as 'None' if the review is not affiliated to any organisation.

Multidisciplinary Pain Center, Department of Anaesthesiology, University Hospital LMU Munich

#### Organisation web address:

#### 11. \* Review team members and their organisational affiliations.

Give the personal details and the organisational affiliations of each member of the review team. Affiliation refers to groups or organisations to which review team members belong. **NOTE: email and country now MUST be entered for each person, unless you are amending a published record.**

## PROSPERO

### International prospective register of systematic reviews

Dr Petra Baeumler. Multidisciplinary Pain Center, Department of Anaesthesiology, University Hospital LMU Munich

Professor Dominik Irnich. Multidisciplinary Pain Center, Department of Anaesthesiology, University Hospital LMU Munich

Mrs Theresa Stübinger. Multidisciplinary Pain Center, Department of Anaesthesiology, University Hospital LMU Munich

#### 12. \* Funding sources/sponsors.

Details of the individuals, organizations, groups, companies or other legal entities who have funded or sponsored the review.

No funding is received

State the funder(s), grant or award number and the date of award

Grant number(s)

#### 13. \* Conflicts of interest.

List actual or perceived conflicts of interest (financial or academic).

Yes

Petra Bäumlner and Dominik Irnich receive honoraria and travel costs from non-profit academic organizations, physician chamber and universities for teaching and lecturing. Theresa Stübinger declares no conflict of interest

#### 14. Collaborators.

Give the name and affiliation of any individuals or organisations who are working on the review but who are not listed as review team members. **NOTE: email and country must be completed for each person, unless you are amending a published record.**

Dr Wenyue Zhang. School of Acupuncture, Moxibustion and Tuina, Beijing University of Chinese Medicine

#### 15. \* Review question.

State the review question(s) clearly and precisely. It may be appropriate to break very broad questions down into a series of related more specific questions. Questions may be framed or refined using PI(E)COS or similar where relevant.

What is the risk for minor and serious adverse events caused by acupuncture?

What kind of adverse events can be caused by acupuncture?

What is the risk of the different types of acupuncture related adverse events?

#### 16. \* Searches.

State the sources that will be searched (e.g. Medline). Give the search dates, and any restrictions (e.g. language or publication date). Do NOT enter the full search strategy (it may be provided as a link or attachment below.)

Databases: PubMed, Scopus, EMBASE

## PROSPERO

### International prospective register of systematic reviews

Publication period: inception to 15th September 2019

Search Terms: acupuncture, adverse event(s), adverse effect(s)

#### 17. URL to search strategy.

Upload a file with your search strategy, or an example of a search strategy for a specific database, (including the keywords) in pdf or word format. In doing so you are consenting to the file being made publicly accessible. Or provide a URL or link to the strategy. Do NOT provide links to your search **results**.

Alternatively, upload your search strategy to CRD in pdf format. Please note that by doing so you are consenting to the file being made publicly accessible.

Do not make this file publicly available until the review is complete

#### 18. \* Condition or domain being studied.

Give a short description of the disease, condition or healthcare domain being studied in your systematic review.

Acupuncture is the insertion of fine needles at certain points, so called acupuncture points, on the patients body for therapeutic or preventive purposes. Acupuncture originates from ancient Chinese medicine, but is nowadays used worldwide in many different variations. There is level 1 for its effectiveness in acute and chronic pain. Needles are stimulated manually, electrically. Often moxibustion is used as an adjunct. The safety of acupuncture has been debated, and surely needle penetration can cause harms, such as tissue damage, peripheral nerve injury and bleeding. In comparison to analgesic drugs for example, risk and consequences of adverse events are deemed minor, but reviews on the safety of acupuncture are either outdated or lack an assessment of study quality.

#### 19. \* Participants/population.

Specify the participants or populations being studied in the review. The preferred format includes details of both inclusion and exclusion criteria.

Humans treated by needle acupuncture

#### 20. \* Intervention(s), exposure(s).

Give full and clear descriptions or definitions of the interventions or the exposures to be reviewed. The preferred format includes details of both inclusion and exclusion criteria.

Acupuncture involving either manual or electrical needle stimulation with or without moxibustion

#### 21. \* Comparator(s)/control.

Where relevant, give details of the alternatives against which the intervention/exposure will be compared (e.g. another intervention or a non-exposed control group). The preferred format includes details of both inclusion and exclusion criteria.

As the aim of this review is to estimate the crude risk of acupuncture related adverse events, comparator group data are not relevant.

#### 22. \* Types of study to be included.

## PROSPERO

### International prospective register of systematic reviews

Give details of the study designs (e.g. RCT) that are eligible for inclusion in the review. The preferred format includes both inclusion and exclusion criteria. If there are no restrictions on the types of study, this should be stated.

Inclusion criteria:

Prospective study

Primary outcome is the risk of acupuncture related adverse events

Treatment involves acupuncture with needles that are stimulated manually or electrically either in combination with or without moxibustion

Articles published in English or German before 15th of September 2019

Exclusion criteria

Treatment involves injection

Treatment involves skin penetration with any other device than classical acupuncture needles such as press needles, cauterization devices etc.

Treatment is restricted to non-penetrating stimulation such as laser acupuncture, acupressure, transcutaneous electrical nerve stimulation or moxibustion

Treatment is restricted to particular body parts associated with low risk of adverse events such as auricular or one-point acupuncture

### 23. Context.

Give summary details of the setting or other relevant characteristics, which help define the inclusion or exclusion criteria.

### 24. \* Main outcome(s).

Give the pre-specified main (most important) outcomes of the review, including details of how the outcome is defined and measured and when these measurement are made, if these are part of the review inclusion criteria.



## PROSPERO

### International prospective register of systematic reviews

Risk of serious and minor acupuncture related adverse events (AE) as number of AE per treatment and patients with AE per 100.000 patients treated

#### \* Measures of effect

Please specify the effect measure(s) for you main outcome(s) e.g. relative risks, odds ratios, risk difference, and/or 'number needed to treat.

adverse events occurring during or after acupuncture treatment

#### 25. \* Additional outcome(s).

List the pre-specified additional outcomes of the review, with a similar level of detail to that required for main outcomes. Where there are no additional outcomes please state 'None' or 'Not applicable' as appropriate to the review

Type of adverse events caused by acupuncture

Risk of the different types of acupuncture related adverse-events

#### \* Measures of effect

Please specify the effect measure(s) for you additional outcome(s) e.g. relative risks, odds ratios, risk difference, and/or 'number needed to treat.

adverse Events occurring during or after acupuncture treatment

#### 26. \* Data extraction (selection and coding).

Describe how studies will be selected for inclusion. State what data will be extracted or obtained. State how this will be done and recorded.

Incidence of acupuncture related adverse events will be extracted as the number of adverse events per treatment and as number of patients experiencing these adverse events per the total number of patients treated. Data extraction will be performed by two independent reviewers who will extract all available data on acupuncture related adverse events from identified studies. This includes extraction of the total number of and/or patients with minor and serious adverse events as well as extraction of the numbers of and/ or patients with all types of adverse events separately in relation to the number of treatments and/or total number of patients treated. The different types of adverse events will be categorized into supersets of adverse events whose risk is calculated separately.

#### 27. \* Risk of bias (quality) assessment.

State which characteristics of the studies will be assessed and/or any formal risk of bias/quality assessment tools that will be used.

Included studies will be assessed for risk of bias according to a checklist developed by Faillie and colleagues for systematic reviews focusing on adverse events.

#### 28. \* Strategy for data synthesis.

Describe the methods you plan to use to synthesise data. This **must not be generic text** but should be **specific to your review** and describe how the proposed approach will be applied to your data. If meta-analysis is planned, describe the models to be used, methods to explore statistical heterogeneity, and software package to be used.

## PROSPERO

### International prospective register of systematic reviews

We will provide the reader with the range (min and max) and the median of the total risk to suffer from an minor and serious adverse event during or after acupuncture treatment that was identified by the studies. The same measures will be provided for the risks of the supersets of adverse events identified from the different studies.

#### 29. \* Analysis of subgroups or subsets.

State any planned investigation of 'subgroups'. Be clear and specific about which type of study or participant will be included in each group or covariate investigated. State the planned analytic approach.

It is likely that certain subsets of patients are at a higher risk for acupuncture related adverse events.

According to the obtained results we will provide characteristics and separate summaries of studies including patients with a high and low risk profile.

#### 30. \* Type and method of review.

Select the type of review, review method and health area from the lists below.

##### Type of review

Cost effectiveness

No

Diagnostic

No

Epidemiologic

No

Individual patient data (IPD) meta-analysis

No

Intervention

No

Meta-analysis

No

Methodology

No

Narrative synthesis

No

Network meta-analysis

No

Pre-clinical

No

Prevention

No

Prognostic

No

Prospective meta-analysis (PMA)

No

Review of reviews

**PROSPERO**
**International prospective register of systematic reviews**

 1  
2  
3  
4 No

 5 Service delivery  
6 No

 7  
8 Synthesis of qualitative studies  
9 No

 10 Systematic review  
11 Yes

 12  
13 Other  
14 No

**Health area of the review**

 15  
16  
17  
18 Alcohol/substance misuse/abuse  
19 No

 20  
21 Blood and immune system  
22 No

 23 Cancer  
24 No

 25  
26 Cardiovascular  
27 No

 28 Care of the elderly  
29 No

 30 Child health  
31 No

 32  
33 Complementary therapies  
34 Yes

 35 COVID-19  
36 No

 37 Crime and justice  
38 No

 39  
40 Dental  
41 No

 42 Digestive system  
43 No

 44 Ear, nose and throat  
45 No

 46  
47 Education  
48 No

 49 Endocrine and metabolic disorders  
50 No

 51 Eye disorders  
52 No

 53  
54 General interest  
55 No

 56 Genetics  
57 No

 58 Health inequalities/health equity  
59 No  
60

## PROSPERO

### International prospective register of systematic reviews

1 Infections and infestations

2 No

3 International development

4 No

5 Mental health and behavioural conditions

6 No

7 Musculoskeletal

8 No

9 Neurological

10 No

11 Nursing

12 No

13 Obstetrics and gynaecology

14 No

15 Oral health

16 No

17 Palliative care

18 No

19 Perioperative care

20 No

21 Physiotherapy

22 No

23 Pregnancy and childbirth

24 No

25 Public health (including social determinants of health)

26 No

27 Rehabilitation

28 No

29 Respiratory disorders

30 No

31 Service delivery

32 No

33 Skin disorders

34 No

35 Social care

36 No

37 Surgery

38 No

39 Tropical Medicine

40 No

41 Urological

42 No

43 Wounds, injuries and accidents

44 No

45 Violence and abuse

46 No

### 31. Language.

Select each language individually to add it to the list below, use the bin icon to remove any added in error.

## PROSPERO

### International prospective register of systematic reviews

English

There is an English language summary.

#### 32. \* Country.

Select the country in which the review is being carried out. For multi-national collaborations select all the countries involved.

Germany

#### 33. Other registration details.

Name any other organisation where the systematic review title or protocol is registered (e.g. Campbell, or The Joanna Briggs Institute) together with any unique identification number assigned by them. If extracted data will be stored and made available through a repository such as the Systematic Review Data Repository (SRDR), details and a link should be included here. If none, leave blank.

The review has not been registered elsewhere.

#### 34. Reference and/or URL for published protocol.

If the protocol for this review is published provide details (authors, title and journal details, preferably in Vancouver format)

Add web link to the published protocol.

Or, upload your published protocol here in pdf format. Note that the upload will be publicly accessible.

No I do not make this file publicly available until the review is complete

Please note that the information required in the PROSPERO registration form must be completed in full even if access to a protocol is given.

#### 35. Dissemination plans.

Do you intend to publish the review on completion?

Yes

Give brief details of plans for communicating review findings.?

A paper presenting the review results will be submitted to a journal listed in MEDLINE. Furthermore, results will be published at international congresses.

#### 36. Keywords.

Give words or phrases that best describe the review. Separate keywords with a semicolon or new line. Keywords help PROSPERO users find your review (keywords do not appear in the public record but are included in searches). Be as specific and precise as possible. Avoid acronyms and abbreviations unless these are in wide use.

acupuncture, adverse-event, adverse-effect, safety, needling, moxibustion, traditional Chinese medicine

#### 37. Details of any existing review of the same topic by the same authors.

If you are registering an update of an existing review give details of the earlier versions and include a full bibliographic reference, if available.

#### 38. \* Current review status.

Update review status when the review is completed and when it is published. New registrations must be ongoing.

Please provide anticipated publication date

**PROSPERO**  
**International prospective register of systematic reviews**

Review\_Ongoing

**39. Any additional information.**

Provide any other information relevant to the registration of this review.

**40. Details of final report/publication(s) or preprints if available.**

Leave empty until publication details are available OR you have a link to a preprint. List authors, title and journal details preferably in Vancouver format.

Give the link to the published review or preprint.

For peer review only



# PRISMA 2009 Checklist

| Section/topic                      | #  | Checklist item                                                                                                                                                                                                                                                                                              | Reported on page # |
|------------------------------------|----|-------------------------------------------------------------------------------------------------------------------------------------------------------------------------------------------------------------------------------------------------------------------------------------------------------------|--------------------|
| <b>TITLE</b>                       |    |                                                                                                                                                                                                                                                                                                             |                    |
| Title                              | 1  | Identify the report as a systematic review, meta-analysis, or both.                                                                                                                                                                                                                                         | 1                  |
| <b>ABSTRACT</b>                    |    |                                                                                                                                                                                                                                                                                                             |                    |
| Structured summary                 | 2  | Provide a structured summary including, as applicable: background; objectives; data sources; study eligibility criteria, participants, and interventions; study appraisal and synthesis methods; results; limitations; conclusions and implications of key findings; systematic review registration number. | 2                  |
| <b>INTRODUCTION</b>                |    |                                                                                                                                                                                                                                                                                                             |                    |
| Rationale                          | 3  | Describe the rationale for the review in the context of what is already known.                                                                                                                                                                                                                              | 4                  |
| Objectives                         | 4  | Provide an explicit statement of questions being addressed with reference to participants, interventions, comparisons, outcomes, and study design (PICOS).                                                                                                                                                  | 4                  |
| <b>METHODS</b>                     |    |                                                                                                                                                                                                                                                                                                             |                    |
| Protocol and registration          | 5  | Indicate if a review protocol exists, if and where it can be accessed (e.g., Web address), and, if available, provide registration information including registration number.                                                                                                                               | 2 / 4 / 19         |
| Eligibility criteria               | 6  | Specify study characteristics (e.g., PICOS, length of follow-up) and report characteristics (e.g., years considered, language, publication status) used as criteria for eligibility, giving rationale.                                                                                                      | 5                  |
| Information sources                | 7  | Describe all information sources (e.g., databases with dates of coverage, contact with study authors to identify additional studies) in the search and date last searched.                                                                                                                                  | 5                  |
| Search                             | 8  | Present full electronic search strategy for at least one database, including any limits used, such that it could be repeated.                                                                                                                                                                               | 5                  |
| Study selection                    | 9  | State the process for selecting studies (i.e., screening, eligibility, included in systematic review, and, if applicable, included in the meta-analysis).                                                                                                                                                   | 5 / 6              |
| Data collection process            | 10 | Describe method of data extraction from reports (e.g., piloted forms, independently, in duplicate) and any processes for obtaining and confirming data from investigators.                                                                                                                                  | 5 / 6              |
| Data items                         | 11 | List and define all variables for which data were sought (e.g., PICOS, funding sources) and any assumptions and simplifications made.                                                                                                                                                                       | 5 - 6              |
| Risk of bias in individual studies | 12 | Describe methods used for assessing risk of bias of individual studies (including specification of whether this was done at the study or outcome level), and how this information is to be used in any data synthesis.                                                                                      | 6                  |
| Summary measures                   | 13 | State the principal summary measures (e.g., risk ratio, difference in means).                                                                                                                                                                                                                               | 6                  |
| Synthesis of results               | 14 | Describe the methods of handling data and combining results of studies, if done, including measures of consistency (e.g., $I^2$ ) for each meta-analysis.                                                                                                                                                   | 6                  |





# PRISMA 2009 Checklist

| Section/topic                 | #  | Checklist item                                                                                                                                                                                           | Reported on page #                                  |
|-------------------------------|----|----------------------------------------------------------------------------------------------------------------------------------------------------------------------------------------------------------|-----------------------------------------------------|
| Risk of bias across studies   | 15 | Specify any assessment of risk of bias that may affect the cumulative evidence (e.g., publication bias, selective reporting within studies).                                                             | 6                                                   |
| Additional analyses           | 16 | Describe methods of additional analyses (e.g., sensitivity or subgroup analyses, meta-regression), if done, indicating which were pre-specified.                                                         | 6                                                   |
| <b>RESULTS</b>                |    |                                                                                                                                                                                                          |                                                     |
| Study selection               | 17 | Give numbers of studies screened, assessed for eligibility, and included in the review, with reasons for exclusions at each stage, ideally with a flow diagram.                                          | 6<br>Figure 1                                       |
| Study characteristics         | 18 | For each study, present characteristics for which data were extracted (e.g., study size, PICOS, follow-up period) and provide the citations.                                                             | 7<br>Table 1                                        |
| Risk of bias within studies   | 19 | Present data on risk of bias of each study and, if available, any outcome level assessment (see item 12).                                                                                                | 9<br>Figure 2A                                      |
| Results of individual studies | 20 | For all outcomes considered (benefits or harms), present, for each study: (a) simple summary data for each intervention group (b) effect estimates and confidence intervals, ideally with a forest plot. | Figure 3 - 5<br>Table 2 / 4<br>Suppl. S6 / S7       |
| Synthesis of results          | 21 | Present results of each meta-analysis done, including confidence intervals and measures of consistency.                                                                                                  | 9 - 12<br>Figure 3 - 5<br>Table 4<br>Suppl. S6 / S7 |
| Risk of bias across studies   | 22 | Present results of any assessment of risk of bias across studies (see Item 15).                                                                                                                          | 9<br>Figure 5 B                                     |
| Additional analysis           | 23 | Give results of additional analyses, if done (e.g., sensitivity or subgroup analyses, meta-regression [see Item 16]).                                                                                    | 9 - 12<br>Figures<br>3C/D 4C/D                      |
| <b>DISCUSSION</b>             |    |                                                                                                                                                                                                          |                                                     |
| Summary of evidence           | 24 | Summarize the main findings including the strength of evidence for each main outcome; consider their relevance to key groups (e.g., healthcare providers, users, and policy makers).                     | 14                                                  |
| Limitations                   | 25 | Discuss limitations at study and outcome level (e.g., risk of bias), and at review-level (e.g., incomplete retrieval of identified research, reporting bias).                                            | 16                                                  |
| Conclusions                   | 26 | Provide a general interpretation of the results in the context of other evidence, and implications for future research.                                                                                  | 14-15                                               |
| <b>FUNDING</b>                |    |                                                                                                                                                                                                          |                                                     |
| Funding                       | 27 | Describe sources of funding for the systematic review and other support (e.g., supply of data); role of funders for the systematic review.                                                               | 18                                                  |

From: Moher D, Liberati A, Tetzlaff J, Altman DG, The PRISMA Group (2009). Preferred Reporting Items for Systematic Reviews and Meta-Analyses: The PRISMA Statement. PLoS Med 6(7): e1000097. doi:10.1371/journal.pmed1000097

For peer review only - <http://bmjopen.bmj.com/site/about/guidelines.xhtml>

For more information, visit: [www.prisma-statement.org](http://www.prisma-statement.org). Page 2 of 2

## MOOSE Checklist for Meta-analyses of Observational Studies

| Item No                                     | Recommendation                                                                                                                                                                                                                                                               | Reported on Page No                       |
|---------------------------------------------|------------------------------------------------------------------------------------------------------------------------------------------------------------------------------------------------------------------------------------------------------------------------------|-------------------------------------------|
| Reporting of background should include      |                                                                                                                                                                                                                                                                              |                                           |
| 1                                           | Problem definition                                                                                                                                                                                                                                                           | 4                                         |
| 2                                           | Hypothesis statement                                                                                                                                                                                                                                                         | -                                         |
| 3                                           | Description of study outcome(s)                                                                                                                                                                                                                                              | page5 table 1                             |
| 4                                           | Type of exposure or intervention used                                                                                                                                                                                                                                        | page5 table 1                             |
| 5                                           | Type of study designs used                                                                                                                                                                                                                                                   | page5 table 1                             |
| 6                                           | Study population                                                                                                                                                                                                                                                             | page5 table 1                             |
| Reporting of search strategy should include |                                                                                                                                                                                                                                                                              |                                           |
| 7                                           | Qualifications of searchers (eg, librarians and investigators)                                                                                                                                                                                                               | title page                                |
| 8                                           | Search strategy, including time period included in the synthesis and key words                                                                                                                                                                                               | page 5                                    |
| 9                                           | Effort to include all available studies, including contact with authors                                                                                                                                                                                                      | page 5                                    |
| 10                                          | Databases and registries searched                                                                                                                                                                                                                                            | page 5                                    |
| 11                                          | Search software used, name and version, including special features used (eg, explosion)                                                                                                                                                                                      | none                                      |
| 12                                          | Use of hand searching (eg, reference lists of obtained articles)                                                                                                                                                                                                             | page 5                                    |
| 13                                          | List of citations located and those excluded, including justification                                                                                                                                                                                                        | table1<br>figure 1                        |
| 14                                          | Method of addressing articles published in languages other than English                                                                                                                                                                                                      | page 5                                    |
| 15                                          | Method of handling abstracts and unpublished studies                                                                                                                                                                                                                         | figure 1                                  |
| 16                                          | Description of any contact with authors                                                                                                                                                                                                                                      | none                                      |
| Reporting of methods should include         |                                                                                                                                                                                                                                                                              |                                           |
| 17                                          | Description of relevance or appropriateness of studies assembled for assessing the hypothesis to be tested                                                                                                                                                                   | pages 4, 5                                |
| 18                                          | Rationale for the selection and coding of data (eg, sound clinical principles or convenience)                                                                                                                                                                                | page 5                                    |
| 19                                          | Documentation of how data were classified and coded (eg, multiple raters, blinding and interrater reliability)                                                                                                                                                               | page 5                                    |
| 20                                          | Assessment of confounding (eg, comparability of cases and controls in studies where appropriate)                                                                                                                                                                             | n.a.                                      |
| 21                                          | Assessment of study quality, including blinding of quality assessors, stratification or regression on possible predictors of study results                                                                                                                                   | page 6                                    |
| 22                                          | Assessment of heterogeneity                                                                                                                                                                                                                                                  | page 6                                    |
| 23                                          | Description of statistical methods (eg, complete description of fixed or random effects models, justification of whether the chosen models account for predictors of study results, dose-response models, or cumulative meta-analysis) in sufficient detail to be replicated | page 6                                    |
| 24                                          | Provision of appropriate tables and graphics                                                                                                                                                                                                                                 | Tables 1-4,<br>figures 1-5<br>Suppl. S1-7 |
| Reporting of results should include         |                                                                                                                                                                                                                                                                              |                                           |
| 25                                          | Graphic summarizing individual study estimates and overall estimate                                                                                                                                                                                                          | figs 3-5                                  |
| 26                                          | Table giving descriptive information for each study included                                                                                                                                                                                                                 | page 7<br>table 1                         |
| 27                                          | Results of sensitivity testing (eg, subgroup analysis)                                                                                                                                                                                                                       | pages 10-12<br>figures 3-5                |
| 28                                          | Indication of statistical uncertainty of findings                                                                                                                                                                                                                            | pages 10-12<br>figures 3-4                |

| Item No                                 | Recommendation                                                                                                            | Reported on Page No      |
|-----------------------------------------|---------------------------------------------------------------------------------------------------------------------------|--------------------------|
| Reporting of discussion should include  |                                                                                                                           |                          |
| 29                                      | Quantitative assessment of bias (eg, publication bias)                                                                    | pages 14-15<br>Suppl. S4 |
| 30                                      | Justification for exclusion (eg, exclusion of non-English language citations)                                             | page 16                  |
| 31                                      | Assessment of quality of included studies                                                                                 | page 15                  |
| Reporting of conclusions should include |                                                                                                                           |                          |
| 32                                      | Consideration of alternative explanations for observed results                                                            | Pages 14-16              |
| 33                                      | Generalization of the conclusions (ie, appropriate for the data presented and within the domain of the literature review) | page 16                  |
| 34                                      | Guidelines for future research                                                                                            | pages 15 - 16            |
| 35                                      | Disclosure of funding source                                                                                              | page 18                  |

|                                  |                                                                                                                                                                                                                                                                                                                                                                                                                                      |                                                                                                                                                                                                                                                                                                                                                                      |                                                                                                                                                                                                                                                                                                                                                                  |
|----------------------------------|--------------------------------------------------------------------------------------------------------------------------------------------------------------------------------------------------------------------------------------------------------------------------------------------------------------------------------------------------------------------------------------------------------------------------------------|----------------------------------------------------------------------------------------------------------------------------------------------------------------------------------------------------------------------------------------------------------------------------------------------------------------------------------------------------------------------|------------------------------------------------------------------------------------------------------------------------------------------------------------------------------------------------------------------------------------------------------------------------------------------------------------------------------------------------------------------|
| <b>Bleeding</b>                  | <ul style="list-style-type: none"> <li>Bleeding</li> <li>Bleeding at needling site</li> <li>Mild / transient / minor bleeding</li> <li>Subcutaneous bleeding</li> <li>Hematoma</li> <li>Minor hematoma</li> <li>Subcutaneous / superficial hematoma</li> </ul>                                                                                                                                                                       | <ul style="list-style-type: none"> <li>Small hemorrhage</li> <li>Lesion of blood vessel</li> <li>Bruising</li> <li>Bruising at needling site</li> <li>Mild / transient bruising</li> <li>Heavy bruising</li> <li>Subcutaneous bruise</li> </ul>                                                                                                                      | <ul style="list-style-type: none"> <li>Ecchymosis or hematoma accompanied by pain</li> <li>Ecchymosis or hematoma without pain</li> <li>Petechia or ecchymosis</li> </ul>                                                                                                                                                                                        |
| <b>Local pain</b>                | <ul style="list-style-type: none"> <li>Pain</li> <li>Needle (-site) pain</li> <li>Pain where needle was inserted / at the site of the needle / in the punctured region</li> <li>Mild / transient pain at needling site</li> <li>Severe / strong / significant pain at needling site</li> </ul>                                                                                                                                       | <ul style="list-style-type: none"> <li>Pain upon insertion / stimulation</li> <li>Pain while needle was in place</li> <li>Pain upon needle withdrawal at the acupuncture point</li> <li>Pain after needle was removed</li> <li>Remaining / residual needle site pain</li> <li>Prolonged / unacceptable pain at needle site</li> </ul>                                | <ul style="list-style-type: none"> <li>Mild pain at the acupuncture site more than one hour after treatment</li> <li>Pain disappearing after &gt; 3 days</li> <li>Chest pain (pneumothorax ruled out)</li> <li>Electroacupuncture problems e.g. too strong current resulting in pain</li> <li>Local muscle pain</li> <li>Unknown pain</li> </ul>                 |
| <b>Other local AE</b>            | <ul style="list-style-type: none"> <li>Wheal</li> <li>(Local) swelling</li> <li>Redness</li> <li>Flare</li> <li>Localized erythema</li> <li>Needle-site / local skin reaction</li> <li>(Skin) irritation at acupuncture point</li> <li>Skin infection</li> <li>Local (skin) infection</li> </ul>                                                                                                                                     | <ul style="list-style-type: none"> <li>Inflammation at application site</li> <li>Itch</li> <li>Itching and redness</li> <li>Itching in the punctured region</li> <li>Itching and erythema (suspected contact dermatitis)</li> <li>Local allergic reaction (urticaria)</li> <li>Needle allergy</li> <li>Allergic phenomena / reaction</li> </ul>                      | <ul style="list-style-type: none"> <li>Significant rash on abdomen few days after acupuncture</li> <li>Cellulitis after treatment of edematous leg</li> <li>Edema in m. tibialis with anterior toe lifting weakness (fully resolved)</li> <li>Other local AE (around the acupuncture site)</li> </ul>                                                            |
| <b>Central nervous system</b>    | <ul style="list-style-type: none"> <li>Aphasia</li> <li>Dizziness</li> <li>Mild / transient dizziness</li> <li>Imbalance</li> <li>Severe dizziness, vertigo or loss of balance</li> </ul>                                                                                                                                                                                                                                            | <ul style="list-style-type: none"> <li>Vertigo</li> <li>Disorientation (length unspecified, 1 h, 1 day)</li> <li>Severe disorientation</li> <li>Disturbed speech</li> <li>Slurred speech</li> </ul>                                                                                                                                                                  | <ul style="list-style-type: none"> <li>Disturbed vision</li> <li>Spontaneous sensory perceptions</li> <li>Shivering</li> <li>Seizure shortly after treatment</li> <li>Tremor</li> </ul>                                                                                                                                                                          |
| <b>Peripheral nervous system</b> | <ul style="list-style-type: none"> <li>Cold sensation at needling site</li> <li>Feeling of acupuncture point at contralateral arm</li> <li>Paraesthesia</li> <li>Temporary paraesthesia</li> <li>Tingling</li> <li>Tingling, prickling, burning, dysesthesia</li> </ul>                                                                                                                                                              | <ul style="list-style-type: none"> <li>Prolonged deqi</li> <li>Strong acupuncture or heavy sensation</li> <li>Hypaesthesia</li> <li>Numbness</li> <li>Numbness in upper extremity</li> <li>Numbness and unusual sensation</li> <li>Severe stiffness or numbness</li> </ul>                                                                                           | <ul style="list-style-type: none"> <li>Hypaesthesia with numbness for three days</li> <li>Insensibility</li> <li>Itching, pins &amp; needles, tingling or burning sensation</li> <li>Nerve irritation</li> <li>Neuritis</li> </ul>                                                                                                                               |
| <b>Aggravation of symptoms</b>   | <ul style="list-style-type: none"> <li>Aggravation</li> <li>Aggravation of complaints / existing ailment / existing symptoms</li> <li>Unexpected, severe or prolonged worsening of symptoms</li> <li>Aggravation of symptoms during acupuncture session / after treatment</li> </ul>                                                                                                                                                 | <ul style="list-style-type: none"> <li>Transient aggravation of symptoms</li> <li>Aggravation of existing symptoms followed by improvement</li> <li>Deterioration / exacerbation of symptoms</li> <li>General aggravation of symptoms</li> <li>Worsening of health state</li> </ul>                                                                                  | <ul style="list-style-type: none"> <li>Worsening of condition (after removing needles)</li> <li>Headache and or facial pain</li> <li>pressure and or tension in the teeth</li> <li>Increased pain</li> </ul>                                                                                                                                                     |
| <b>Vegetative nervous system</b> | <ul style="list-style-type: none"> <li>(Generalized) sweating</li> <li>Isolated sweating of hands</li> <li>Mild sweating</li> <li>Flushed cheeks and body warmth</li> <li>Hot flash</li> <li>Feeling of warm / heat / cold</li> <li>Coldness / feeling cold</li> <li>Freezing</li> <li>(Feeling of) fatigue</li> <li>Extreme feeling of fatigue</li> <li>Feeling tired (mild transient)</li> <li>Tiredness and exhaustion</li> </ul> | <ul style="list-style-type: none"> <li>Abnormal tiredness</li> <li>Severe / significant tiredness or exhaustion</li> <li>Lethargy</li> <li>Dazed</li> <li>Vasovagal reaction: collapse, dizziness, nausea &amp; vomiting</li> <li>Unconsciousness</li> <li>Fainting</li> <li>Faint / dizzy</li> <li>Feel faint / drowsy</li> <li>Feel faint (significant)</li> </ul> | <ul style="list-style-type: none"> <li>Significant / severe drowsiness</li> <li>Drowsiness not causing hazard</li> <li>Prolonged drowsiness (one day, one week)</li> <li>Drowsiness or restlessness</li> <li>Orthostatic problems</li> <li>Malaise</li> <li>Poor concentration</li> <li>Dry lips / mouth</li> <li>Xerostomia</li> <li>Hunger / thirst</li> </ul> |

|                                                              |                                                                     |                                                       |
|--------------------------------------------------------------|---------------------------------------------------------------------|-------------------------------------------------------|
| <b>Motor system</b>                                          |                                                                     |                                                       |
| • Cramp                                                      | • Heavy legs                                                        | • Joint problems                                      |
| • General muscle tenderness                                  | • Knee went weak                                                    | • Restricted movement                                 |
| • Muscle spasm / tension / weakness                          | • Weakness in legs / legs or arms                                   | • Stiffness                                           |
| <b>Distant pain</b>                                          |                                                                     |                                                       |
| • Pain / ache / discomfort other than at needling site       | • Mild transient pain not at needling site                          | • Generalized muscle pain                             |
| • Reactive pain at other body sites                          | • Chest pain / tightness                                            | • Other / unspecified pain / aches                    |
| <b>Gastrointestinal / gynaecological system</b>              |                                                                     |                                                       |
| • Nausea                                                     | • Tiredness next day after ten hours of diarrhoea (significant)     | • Increased peristalsis                               |
| • Mild and transient nausea                                  | • Stomach ache                                                      | • Loss of appetite                                    |
| • Severe nausea                                              | • Abdominal distension                                              | • Other gastrointestinal complaints                   |
| • Vomiting                                                   | • Impaired bowel function                                           | • Increased haemorrhage during menses                 |
| • Severe vomiting                                            | • Digestive problems                                                | • Menstrual problems                                  |
| • Constipation                                               | • Enteric- / gastrospasm                                            |                                                       |
| • Diarrhoea                                                  |                                                                     |                                                       |
| <b>Cardiovascular system</b>                                 |                                                                     |                                                       |
| • Cardiovascular / circulatory problems                      | • Increase in blood pressure                                        | • Tachycardia                                         |
| • Depression of blood pressure                               | • Palpitation                                                       | • Other cardiac disturbances                          |
| <b>Respiratory system</b>                                    |                                                                     |                                                       |
| • Asthma attack                                              | • Breathing difficulties                                            | • Bronchitis or airway problems                       |
| <b>Generalized skin reactions</b>                            |                                                                     |                                                       |
| • Dermatological problems                                    | • Other dermatological phenomena                                    |                                                       |
| <b>Headache</b>                                              |                                                                     |                                                       |
| • Headache                                                   | • Headache for three days                                           | • Severe headache or migraine                         |
| • Headache the next day                                      | • Migraine attack                                                   |                                                       |
| <b>Emotional interference</b>                                |                                                                     |                                                       |
| • Aggressive behaviour                                       | • Depressive mood                                                   | • Severe emotional outburst and anger at practitioner |
| • Anxiety                                                    | • Discomfort                                                        | • Fear                                                |
| • Anxiety and panic (up to one hour)                         | • Restlessness or nervousness                                       | • Grief / crying / tearful                            |
| • Significant panic with sensation of heat and sweatiness    | • Disorientation, anxiety, nervousness, insomnia or emotional       | • Needle phobia, anxiety and rage                     |
| • Severe panic / agitation / depression with anxiety         | • Emotional /psychological reaction                                 | • (Severe) nightmares                                 |
| • Depressed emotional state or neurovegetative dystonia      | • (Uncontrolled) euphoria                                           | • Other mood swings                                   |
|                                                              | • Significant emotional release (manic, relaxed, rage or confusion) |                                                       |
| <b>Sleeping problems</b>                                     |                                                                     |                                                       |
| • Sleep disturbances                                         | • Severe sleeping problems                                          | • Insomnia                                            |
| • Impaired sleep                                             | • Severe sleeplessness                                              |                                                       |
| <b>Moxa caused adverse events</b>                            |                                                                     |                                                       |
| • Burn injury                                                | • Burns                                                             | • Blister following moxibustion                       |
| <b>Needling malpractice</b>                                  |                                                                     |                                                       |
| • Left alone / unattended in the treatment room for too long | • Failure to remove needle(s)                                       |                                                       |
| • Broken needle                                              | • Forgotten / dropped needle                                        |                                                       |
| • Stuck or bent needle                                       | • Needle lost or forgotten                                          |                                                       |
| <b>Other or unclassified adverse events</b>                  |                                                                     |                                                       |
| • Change of symptoms                                         | • Nose bleeding                                                     | • Additional comments                                 |
| • Illness                                                    | • Miscellaneous symptoms                                            | • Other systematic symptoms                           |
| • Sick                                                       | • Haematuria on next day                                            | • Other neurological problems                         |
| • (Systemic) infection                                       | • Increased urinary frequency                                       | • Others / unspecified / other (mild) adverse events  |
| • Fever                                                      | • Concomitant diseases of recent appearance                         | • other negative reactions                            |
| • Angina                                                     | • Change of taste                                                   | • Unknown due to incomplete record form               |
| • Eye irritation                                             | • Change of weight / weight reduction                               |                                                       |
| • Irritated tongue                                           |                                                                     |                                                       |

### Online supplementary appendix S3: Categorization of adverse events

Subheadings represent the categories to which adverse events (AE) were assigned. AE descriptors extracted from the included publication are reported verbatim or in spirit in order to provide an overview of the different wordings concerning AE type and severity. Slashes indicate that expressions were also used separately. Terms in brackets indicate that such terms were not used in all of the descriptors with otherwise similar wording.

| Study            | AE definition<br>(direct quotes with eventual comments)                                                                                                                                                                                                                                                                                                                                                                                                                                                                                                                                                                                                               | Severity rating<br>(direct quotes with eventual comments)                                                                                                                                                                                                                                                                          |
|------------------|-----------------------------------------------------------------------------------------------------------------------------------------------------------------------------------------------------------------------------------------------------------------------------------------------------------------------------------------------------------------------------------------------------------------------------------------------------------------------------------------------------------------------------------------------------------------------------------------------------------------------------------------------------------------------|------------------------------------------------------------------------------------------------------------------------------------------------------------------------------------------------------------------------------------------------------------------------------------------------------------------------------------|
| Chung 2015       | "Participants were asked the acupuncture AEs by acupuncturists using an open-ended question first, then the AcupAE. The open ended question asked if they had any discomfort during treatment and after the last few treatments."                                                                                                                                                                                                                                                                                                                                                                                                                                     | "...mild AE required no treatment or resolved within 1 day, moderate AE lasted more than 1 day or relieved by non-prescription medication, severe AE required medical treatment."                                                                                                                                                  |
| Da Silva 2014    | "Adverse effects were defined as 'any unusual, inconvenient or ill-effect, no matter how small, that is unintended and non-therapeutic', Examples were given to patients"; "We did not included 'aggravation of symptoms' because of the difficulty in judging whether the event was associated with acupuncture, was serious or not, and also because some practitioners believe that transient worsening is part of treatment."                                                                                                                                                                                                                                     | "A 'serious event' was considered as one which needed further specific medical intervention or had interfered with the patient's normal life for at least the remainder of the day"                                                                                                                                                |
| Endres 2004      | "The ICH definition of an adverse event (AEs) is any untoward medical occurrence experienced by patients, temporally but not necessarily causally associated with the use of a drug or medical treatment..."                                                                                                                                                                                                                                                                                                                                                                                                                                                          | "... serious adverse event (SAEs) identified, according to the ICH, as an adverse event that results in a life-threatening condition or death, requires hospitalization or prolongation of existing hospitalization, or results in persistent or significant disability or incapacity, including congenital anomaly/birth defects" |
| Ernst 2003       | "A checklist was provided which mentioned haemorrhage, haematoma, infections, neurological abnormalities, fainting, vestibular symptoms, nausea, prolonged DeQi effect and increase of pain. Free space was provided to record other observed adverse effects. All therapists asked their patients with standardised open questions: during therapy, "How do you feel now?"; and before every subsequent therapy, "How did you feel after the last acupuncture therapy?". The therapists were asked to document 'possible septic syndrome' if fever and/or hypotension were observed in combination with local infection at one or more points that had been needed." | SAE not defined                                                                                                                                                                                                                                                                                                                    |
| Furose 2017      | "...any untoward medical occurrence in a patient who underwent acupuncture therapy and which does not necessarily have a causal relationship with this treatment."<br>In line with ICH but only selection list with AE likely related to acupuncture applied                                                                                                                                                                                                                                                                                                                                                                                                          | "...serious AE (pneumothorax, other organ injury, central nerve injury, peripheral nerve injury, suppurative arthritis, suppurative myositis, cellulitis, hepatitis B, hepatitis C, needle breakage and/or needle migration, accidental insertion, and other symptoms that practitioners regarded as serious)..."                  |
| Leung 2009       | "A list of possible complications and adverse effects was used to check the events thoroughly. The list consisted of bleeding, obvious tissue/ organ damage, fainting, syncope, persistent needle pain, post-puncture tiredness, palpitation, exacerbation of symptoms nausea, dyspnea, convulsion, psychological symptoms, etc."                                                                                                                                                                                                                                                                                                                                     | SAE not defined<br>"no harmful complication was encountered"                                                                                                                                                                                                                                                                       |
| List 1992        | "In this paper, adverse event refers to any reaction to a treatment besides the intended treatment effect irrespective of any correlation between the treatment and the reaction."                                                                                                                                                                                                                                                                                                                                                                                                                                                                                    | SAE not defined                                                                                                                                                                                                                                                                                                                    |
| Mac Pherson 2001 | "Practitioners were asked to record mild transient reactions to treatment, within one or more of three categories (systemic, aggravation, local)"                                                                                                                                                                                                                                                                                                                                                                                                                                                                                                                     | "... 'significant adverse event' was defined as any event that was 'unusual, novel, dangerous, significantly inconvenient, or requiring further information'..."                                                                                                                                                                   |
| Mac Pherson 2004 | "For the purposes of this survey we did not define an adverse event but, instead, provided patients with a checklist of possible events. This and the overall questionnaire, while not formally validated, were developed from two practitioner surveys."                                                                                                                                                                                                                                                                                                                                                                                                             | "In contrast, "serious adverse events" were predefined as those resulting in admission to hospital or being permanently disabling or life threatening"                                                                                                                                                                             |
| Mac Pherson 2005 | "Patients were asked to report short term reactions, by answering the question: 'Thinking about the visit at which you were given this form, did you experience during or immediately after your acupuncture any of the following?' We provided a checklist of possible short term reactions drawn from the results of two recently published practitioner surveys."                                                                                                                                                                                                                                                                                                  | SAE not defined                                                                                                                                                                                                                                                                                                                    |
| Melchart 1998    | „Der Fragebogen sollte, der Erfahrung der behandelnden Ärzte entsprechend vergleichsweise häufige Ereignisse erfassen, die aus Patientensicht im allgemeinen als unangenehm oder unerwünscht beurteilt werden"<br>English translation: The questionnaire was designed to reflect relatively frequent events that are, according to the physicians' experience, often experienced as unpleasant or adverse by the patient.                                                                                                                                                                                                                                             | SAE not defined                                                                                                                                                                                                                                                                                                                    |
| Melchart 2004    | "...physicians had to report whether an adverse effect (defined as any adverse event possibly related to acupuncture) occurred. If this was the case, the adverse effect had to be specified. Predefined categories were bleeding, needling pain, hematoma, infection orthostatic problems, forgotten needles, and any other events."                                                                                                                                                                                                                                                                                                                                 | "Serious adverse effects (defined as any adverse effects possibly related to acupuncture making treatment necessary or severely interfering with the patient's wellbeing, eg a pneumothorax or a nerve injury)..."                                                                                                                 |
| Odsberg 2001     | "Negative side effect – a non-intended effect of the acupuncture treatment that the patient experiences as negative, i.e. haematoma and fainting."                                                                                                                                                                                                                                                                                                                                                                                                                                                                                                                    | "Complication – a non-intended effect of the acupuncture treatment that may threaten the patient's life, i.e. pneumothorax."                                                                                                                                                                                                       |
| Park 2009        | "Therefore, this study has surveyed to report on short-term reactions as well as de qi, side-effects, and the satisfaction of patients following acupuncture treatment.", "After explaining the purpose of the survey to the patients, we had them fill out a survey form querying their reactions..."                                                                                                                                                                                                                                                                                                                                                                | SAE not defined                                                                                                                                                                                                                                                                                                                    |



|                   |                                                                                                                                                                                                                                                                                                                                                                                                                                                                                                                                                                                                                                                                                                                                                                                                                                                                                                                                                                                                                                 |                                                                                                                                                                                                                                                                                                                                                                                                                                                                                                                                                                                                                      |
|-------------------|---------------------------------------------------------------------------------------------------------------------------------------------------------------------------------------------------------------------------------------------------------------------------------------------------------------------------------------------------------------------------------------------------------------------------------------------------------------------------------------------------------------------------------------------------------------------------------------------------------------------------------------------------------------------------------------------------------------------------------------------------------------------------------------------------------------------------------------------------------------------------------------------------------------------------------------------------------------------------------------------------------------------------------|----------------------------------------------------------------------------------------------------------------------------------------------------------------------------------------------------------------------------------------------------------------------------------------------------------------------------------------------------------------------------------------------------------------------------------------------------------------------------------------------------------------------------------------------------------------------------------------------------------------------|
| Park 2010         | <p>"According to the World Health Organization (WHO), an AE is described as "any untoward medical occurrence that may present during treatment with a pharmaceutical product but which does not necessarily have a causal relationship with this treatment.".</p> <p>"In the AE section, the reporter was asked to describe when the AEs appeared and disappeared, the type and details of the AE, and the treatment for the AE. Two (2) types of AE were identified: local AEs and systemic AEs....", "Local AEs included a broken or forgotten needle, hemorrhage, needle allergy, needle-site pain, hematoma, and a stuck or bent needle. Systemic AEs included drowsiness, fainting, fever, hypotension, nausea, vomiting, diarrhea, sweating, headache, discomfort, dizziness, anxiety and panic, seizure, insensibility, mental disturbance, pain, temporary paresthesia, pneumothorax, organ or tissue injury, hepatitis B/C, otitis externa, sepsis, central nerve injury, skin infection, or symptom aggravation."</p> | <p>"The International Conference on Harmonization guidelines define a serious AE as any untoward medical occurrence that, at any dose, results in death, is life-threatening, requires inpatient hospitalization or prolongation of existing hospitalization, results in persistent or significant disability/incapacity, or is a congenital anomaly/birth defect.<sup>18</sup> There were no serious AEs related to acupuncture in this study."</p>                                                                                                                                                                 |
| Weidenhammer 2008 | <p>„Außerdem wurde gefragt: „Welche unerwünschten Wirkungen oder Komplikationen der Akupunktur sind aufgetreten?“ Antwortoptionen waren hier: „Blutung“, „Nadelschmerz“, „Hämatom“, „Infektionen“, „Kreislaufprobleme“, „vergessene Nadeln“ und „andere“ (mit Freitextfeld zur Beschreibung des Ereignisses).“</p> <p>English translation: Furthermore it was asked „Which adverse effects or complications occurred through acupuncture?“ Response options were: 'bleeding', 'needling pain', 'haematoma', 'infections', 'circulatory problems', 'forgotten needles' and 'others' (with free text for a description of the event)</p>                                                                                                                                                                                                                                                                                                                                                                                          | <p>"Als schwerwiegende unerwünschte Therapiewirkungen waren alle Ereignisse zu bewerten, die a) möglicherweise in einem kausalen Zusammenhang mit der Akupunkturbehandlung standen und b) behandlungspflichtig waren oder/und den Patienten gravierend beeinträchtigten oder gefährdeten (z. B. Pneumothorax, Nervenläsion).“</p> <p>English translation: Serious adverse treatment effects were defined as events that a) had a possibly causal relationship with the acupuncture treatment and b) required treatment and/or compromised or threatened the patient seriously (e.g. pneumothorax, nerve lesion).</p> |
| Wen 2017          | <p>"Adverse events, including pain, hematoma, perforation, bleeding, fainting, local infection, abscess, or breakage or retention of the needle after treatment, were recorded after every session."</p>                                                                                                                                                                                                                                                                                                                                                                                                                                                                                                                                                                                                                                                                                                                                                                                                                        | <p>SAE not defined</p>                                                                                                                                                                                                                                                                                                                                                                                                                                                                                                                                                                                               |
| White 2001        | <p>"We defined an adverse event as 'any ill-effect, no matter how small, that is unintended and nontherapeutic'. This definition was used both in order to identify events that occurred through error but were not reactions to acupuncture, and in order to include minor events such as bleeding, not just serious events, even when these may have been an expected consequence of needling. We decided not to record unintended beneficial or pleasant events.", "...number of adverse events classified under specific headings...", "Some practitioners regard aggravation or drowsiness as a part of the response to treatment (the 'healing crisis'), and not as unintended 'adverse' events. Therefore, if a patient later improved substantially, respondents were instructed to convert the relevant mark in the box to an asterisk."</p>                                                                                                                                                                           | <p>"Significant Event Report....to record any event that was 'unusual, novel, dangerous, significantly inconvenient or requiring further information'. Examples were provided, which included needling problems (broken or forgotten needle, moxa burns), systemic effects (faint, convulsion, drowsiness causing hazard e.g. on the road, severe nausea) and symptoms (unexpected or prolonged aggravation)."</p>                                                                                                                                                                                                   |
| Witt 2009         | <p>"At the end of each treatment cycle, all patients were asked to complete a standardised questionnaire and to document adverse events they associated with acupuncture (defined as adverse effects) in free text and, if necessary, the kind of treatment they had needed (self-treatment, medication/physician treatment, treatment in hospital). Adverse events without association to the acupuncture treatment were not documented."</p>                                                                                                                                                                                                                                                                                                                                                                                                                                                                                                                                                                                  | <p>"Patients who reported adverse effects which needed treatment, received from the study office an additional, more detailed standardised questionnaire concerning their most important adverse effect."</p>                                                                                                                                                                                                                                                                                                                                                                                                        |
| Yamashita 1999    | <p>"We defined AE as an unfavorable medical event that occurred during or after the treatment regardless of causal relationships [Beam 1992]"</p>                                                                                                                                                                                                                                                                                                                                                                                                                                                                                                                                                                                                                                                                                                                                                                                                                                                                               | <p>"...no serious or severe cases of negligence such as pneumothorax or spinal cord injury were reported in the TCT Clinic But 2 cases identified from reports that required hospitalization / likely to have caused disability."</p>                                                                                                                                                                                                                                                                                                                                                                                |
| Yamashita 2000    | <p>"The acupuncturists meticulously observed the punctured region and general condition of the patients during and immediately after treatment. The patients were asked to report any pain or discomfort caused by needle insertion. In the interview after each treatment session, the acupuncturists asked the patients, "Did you feel any discomfort during today's treatment session, or do you have now such a feeling that did not exist before the treatment session? Please tell me every slight discomfort even if you don't think it is a problem." A similar question was asked at the patient's next visit, "Did you feel any discomfort that may have had something to do with the previous treatment, after you left our clinic?"</p>                                                                                                                                                                                                                                                                             | <p>"Details recorded on the report form included ... severity or magnitude of symptom, and treatment for the reaction.",<br/>"All reactions were mild and transient."<br/>"No medical care was required for any of these reactions."</p>                                                                                                                                                                                                                                                                                                                                                                             |
| Zhao 2011         | <p>"AE is defined as an unfavourable medical event that occurs during or after the treatment regardless of causal relationship",<br/>"AE and SAE were defined a priori from the literature and the State Food and Drug Administration (SFDA) in China."</p>                                                                                                                                                                                                                                                                                                                                                                                                                                                                                                                                                                                                                                                                                                                                                                     | <p>"Serious adverse effects (SAEs) refers to those that caused hospitalisation, extended duration of hospitalisation, disability, impaired ability to work, death or were life threatening, resulting in events such as congenital malformations in the process of the clinical trials."</p>                                                                                                                                                                                                                                                                                                                         |

Online supplementary appendix S4: Definition of adverse events with respective severity ratings as direct quotes from the included manuscripts



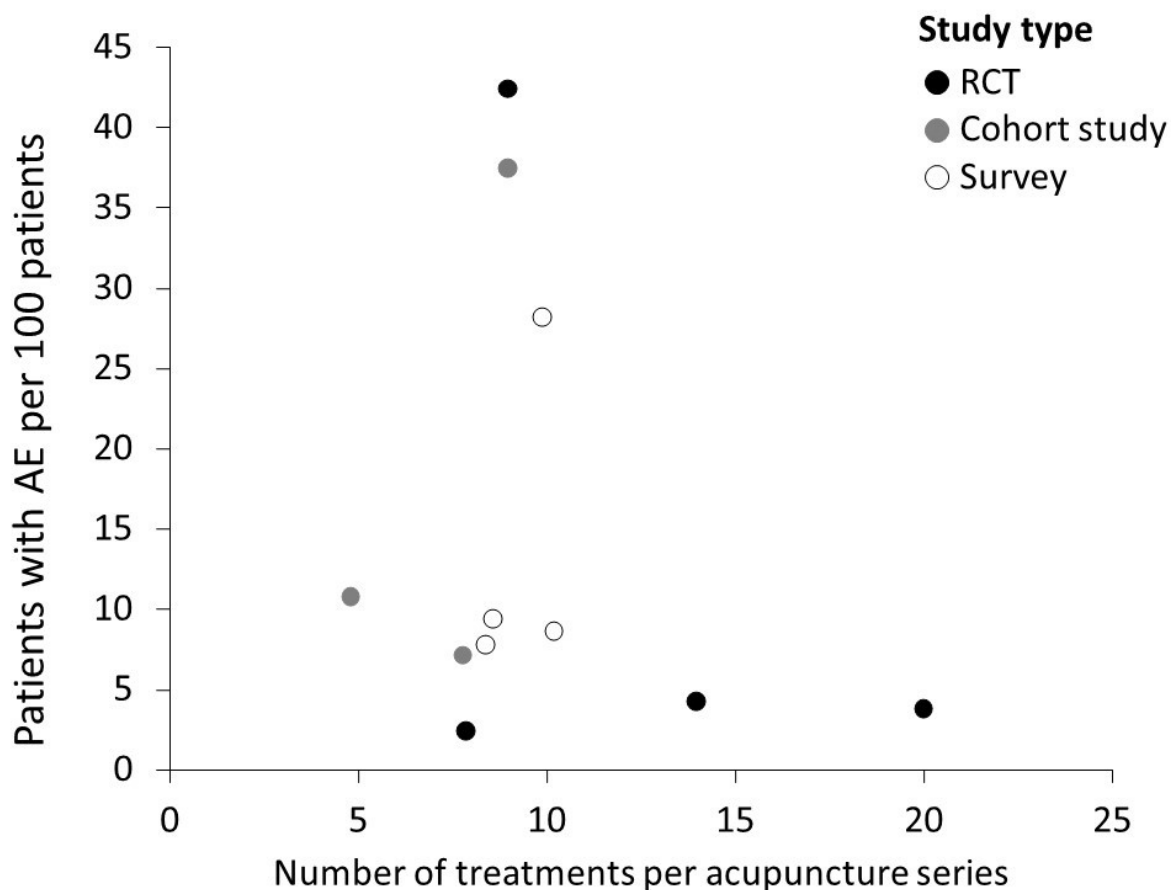

Online supplementary appendix S5: Independence of incidences of adverse events per patient from the number of treatments per acupuncture series and study type

Scatterplot of the number of treatments applied within an acupuncture series against the observed adverse events (AE) incidence as patients with AE per 100 patients

| Study                        | Total number of patients | Risk as patients with AE per 100 patients [95%-CI] |                         |                            |                         |                         |                         |                           |                         |                                          |                         |
|------------------------------|--------------------------|----------------------------------------------------|-------------------------|----------------------------|-------------------------|-------------------------|-------------------------|---------------------------|-------------------------|------------------------------------------|-------------------------|
|                              |                          | Bleeding                                           | Needle sit pain         | Other local AE             | Vegetative reaction     | Aggravation of symptoms | Central nervous system  | Peripheral nervous system | Distant pain            | Gastrointestinal / gynaecological system | Unclassified AE         |
| List 1992                    | 29                       |                                                    | 44.83<br>[27.46; 62.87] |                            | 58.62<br>[40.52; 75.59] | 93.10<br>[81.26; 99.30] | 37.93<br>[21.45; 55.99] | 27.59<br>[13.14; 44.96]   |                         | 17.24<br>[5.94; 32.83]                   | 3.45<br>[0.00; 12.99]   |
| Chung 2015                   | 59                       | 15.25<br>[7.30; 25.45]                             | 32.20<br>[20.99; 44.57] | 35.59<br>[23.97; 48.14]    | 13.56<br>[6.10; 23.38]  |                         | 5.08<br>[0.99; 12.08]   | 11.86<br>[4.94; 21.26]    |                         | 5.08<br>[0.99; 12.08]                    | 3.39<br>[0.33; 9.47]    |
| Wen 2016                     | 120                      | 0.83<br>[0.00; 3.24]                               | 2.50<br>[0.48; 6.04]    |                            |                         |                         |                         |                           | 0.83<br>[0.00; 3.24]    |                                          |                         |
| Melchart 1998                | 121                      | 3.31<br>[0.88; 7.21]                               | 14.05<br>[8.46; 20.78]  | 1.65<br>[0.16; 4.68]       | 8.26<br>[4.05; 13.81]   | 10.74<br>[5.88; 16.85]  | 2.48<br>[0.48; 5.99]    | 0.83<br>[0.00; 3.21]      | 0.83<br>[0.00; 3.21]    | 4.13<br>[1.33; 8.39]                     |                         |
| Leung 2009                   | 254                      | 2.36<br>[0.86; 4.58]                               |                         |                            |                         |                         |                         |                           |                         |                                          |                         |
| Yamashita 2000               | 391                      |                                                    | 0.26<br>[0.00; 1.00]    | 1.02<br>[0.27; 2.26]       | 11.76<br>[8.76; 15.14]  | 2.81<br>[1.41; 4.68]    | 0.77<br>[0.15; 1.87]    |                           |                         |                                          |                         |
| Ernst 2003                   | 409                      | 25.18<br>[21.10; 29.50]                            | 8.07<br>[5.63; 10.90]   | 0.24<br>[0.00; 0.96]       | 6.36<br>[4.20; 8.92]    | 0.98<br>[0.26; 2.16]    | 6.11<br>[4.00; 8.64]    | 4.89<br>[3.01; 7.19]      |                         | 1.96<br>[0.84; 3.52]                     | 17.85<br>[14.29; 21.70] |
| Zhao 2011                    | 1968                     | 3.40<br>[2.65; 4.25]                               | 0.05<br>[0.00; 0.20]    |                            | 0.10<br>[0.01; 0.29]    |                         | 0.05<br>[0.00; 0.20]    |                           |                         | 0.05<br>[0.00; 0.20]                     |                         |
| Furuse 2017                  | 2180                     | 12.80<br>[11.43; 14.23]                            | 6.24<br>[5.26; 7.29]    |                            |                         | 1.06<br>[0.67; 1.53]    |                         |                           |                         |                                          | 1.10<br>[0.71; 1.58]    |
| Weidenhammer 2008 patients   | 5998                     | 0.48<br>[0.32; 0.67]                               | 0.32<br>[0.19; 0.47]    | 0.32<br>[0.19; 0.47]       | 2.72<br>[2.32; 3.14]    | 0.80<br>[0.59; 1.04]    | 0.90<br>[0.68; 1.16]    | 0.47<br>[0.31; 0.66]      | 0.95<br>[0.72; 1.21]    | 0.62<br>[0.43; 0.83]                     | 0.47<br>[0.31; 0.66]    |
| MacPherson 2004              | 6348                     | 0.58<br>[0.41; 0.79]                               | 1.86<br>[1.54; 2.21]    | 0.36<br>[0.23; 0.53]       | 4.69<br>[4.19; 5.23]    | 1.20<br>[0.94; 1.48]    | 0.87<br>[0.65; 1.11]    | 0.65<br>[0.46; 0.86]      | 0.17<br>[0.09; 0.29]    | 0.96<br>[0.74; 1.22]                     | 0.38<br>[0.24; 0.54]    |
| Melchart 2004                | 97733                    | 4.56<br>[4.43; 4.70]                               | 3.28<br>[3.17; 3.39]    | 0.18<br>[0.15; 0.20]       | 0.48<br>[0.44; 0.53]    | 0.12<br>[0.10; 0.14]    |                         |                           |                         |                                          | 0.33<br>[0.29; 0.36]    |
| Endres 2004                  | 190924                   | 5.18<br>[5.08; 5.28]                               | 0.05<br>[0.04; 0.06]    | 24.51<br>[24.31; 24.70]    | 0.70<br>[0.67; 0.74]    | 1.31<br>[1.26; 1.36]    |                         | 0.08<br>[0.07; 0.10]      |                         |                                          | 0.07<br>[0.05; 0.08]    |
| Witt 2009                    | 229230                   | 6.15<br>[6.05; 6.24]                               | 0.45<br>[0.43; 0.48]    | 0.60<br>[0.57; 0.63]       | 0.30<br>[0.28; 0.33]    | 0.40<br>[0.38; 0.43]    | 0.26<br>[0.24; 0.28]    | 0.26<br>[0.24; 0.28]      | 0.76<br>[0.72; 0.79]    | 0.22<br>[0.20; 0.24]                     | 0.11<br>[0.10; 0.12]    |
| Weidenhammer 2008 therapists | 503397                   | 4.84<br>[4.78; 4.90]                               | 3.95<br>[3.90; 4.01]    | 0.15<br>[0.14; 0.16]       | 0.08<br>[0.07; 0.08]    | 0.08<br>[0.07; 0.09]    |                         |                           |                         | 0.01<br>[0.01; 0.02]                     | 0.26<br>[0.25; 0.28]    |
| Fixed effect                 |                          | 5.09<br>[5.05; 5.13]                               | 1.81<br>[1.78; 1.84]    | 1.85<br>[1.83; 1.88]       | 0.25<br>[0.24; 0.26]    | 0.29<br>[0.28; 0.30]    | 0.28<br>[0.26; 0.31]    | 0.18<br>[0.17; 0.19]      | 0.74<br>[0.71; 0.77]    | 0.06<br>[0.05; 0.06]                     | 0.19<br>[0.18; 0.20]    |
| Random effect                |                          | 4.67<br>[2.08; 8.22]                               | 3.75<br>[0.74; 8.94]    | 2.79<br>[0.02; 10.01]      | 1.95<br>[0.40; 4.63]    | 1.48<br>[0.00; 5.90]    | 1.45<br>[0.07; 4.51]    | 0.69<br>[0.02; 2.34]      | 0.60<br>[0.21; 1.20]    | 0.60<br>[0.04; 1.81]                     | 0.57<br>[0.01; 1.95]    |
| tau <sup>2</sup>             |                          | 0.0008                                             | 0.0085                  | 0.0494                     | 0.0012                  | 0.0017                  | 0.0018                  | 0.0004                    | 0.0005                  | 0.0008                                   | 0.0003                  |
| I <sup>2</sup>               |                          | 99.4%<br>[99.3%; 99.5%]                            | 99.9%<br>[99.9%; 99.9%] | 100.0%<br>[100.0%; 100.0%] | 99.7%<br>[99.7%; 99.7%] | 99.8%<br>[99.8%; 99.8%] | 96.3%<br>[94.6%; 97.5%] | 98.1%<br>[97.4%; 98.7%]   | 92.6%<br>[85.7%; 96.2%] | 99.3%<br>[99.1%; 99.4%]                  | 99.0%<br>[98.7%; 99.2%] |
| p-value Q-test               |                          | < 0.0001                                           | < 0.0001                | < 0.0001                   | < 0.0001                | < 0.0001                | < 0.0001                | < 0.0001                  | < 0.0001                | < 0.0001                                 | < 0.0001                |

| Study                        | Total number of patients | Risk as patients with AE per 100 patients [95%-CI] |                         |                         |                           |                         |                         |                         |                         |                        |
|------------------------------|--------------------------|----------------------------------------------------|-------------------------|-------------------------|---------------------------|-------------------------|-------------------------|-------------------------|-------------------------|------------------------|
|                              |                          | Headache                                           | Cardiovascular system   | Motor system            | Generalized skin reaction | Needling malpractice    | Emotional interference  | Sleeping problems       | Moxibustion AE          | Respiratory system     |
| List 1992                    | 29                       |                                                    |                         | 41,38<br>[24,41; 59,48] |                           |                         |                         | 20,69<br>[8,19; 37,03]  |                         |                        |
| Chung 2015                   | 59                       | 13.56<br>[6.0980; 23.38]                           |                         |                         | 1,69<br>[0,00; 6,52]      | 0,00<br>[0,00; 1,62]    |                         |                         |                         |                        |
| Wen 2016                     | 120                      |                                                    |                         |                         |                           |                         |                         |                         |                         |                        |
| Melchart 1998                | 121                      |                                                    | 0.83<br>[0,00; 3,21]    |                         |                           |                         | 0,83<br>[0,00; 3,21]    |                         |                         |                        |
| Leung 2009                   | 254                      |                                                    |                         |                         |                           |                         |                         |                         |                         |                        |
| Yamashita 2000               | 391                      | 0.51<br>[0.0485; 1.46]                             |                         |                         |                           |                         |                         |                         |                         |                        |
| Ernst 2003                   | 409                      | 0.49<br>[0.0463; 1.40]                             | 0.49<br>[0.05; 1.40]    | 0,24<br>[0,00; 0,96]    |                           |                         | 0,98<br>[0,26; 2,16]    |                         |                         | 0,24<br>[0,00; 0,96]   |
| Zhao 2011                    | 1968                     |                                                    |                         | 0,10<br>[0,01; 0,29]    |                           |                         |                         |                         |                         |                        |
| Furuse 2017                  | 2180                     | 0.05<br>[0.0000; 0.18]                             |                         |                         |                           | 0,60<br>[0,32; 0,96]    |                         |                         | 0,96<br>[0,60; 1,42]    |                        |
| Weidenhammer 2008 patients   | 5998                     | 1.37<br>[1.0889; 1.68]                             | 0.60<br>[0.42; 0.81]    | 0,35<br>[0,22; 0,52]    |                           |                         |                         | 0,13<br>[0,06; 0,24]    |                         | 0,07<br>[0,02; 0,15]   |
| MacPherson 2004              | 6348                     | 1.21<br>[0.9585; 1.50]                             |                         |                         |                           | 1,04<br>[0,81; 1,30]    | 1,24<br>[0,99; 1,53]    | 0,74<br>[0,54; 0,97]    | 0,44<br>[0,29; 0,62]    |                        |
| Melchart 2004                | 97733                    | 0.04<br>[0.0275; 0.05]                             |                         |                         |                           | 0,25<br>[0,22; 0,28]    |                         |                         |                         |                        |
| Endres 2004                  | 190924                   |                                                    |                         |                         |                           | 0,00<br>[0,00; 0,00]    | 0,04<br>[0,03; 0,05]    | 0,04<br>[0,03; 0,05]    | 0,00<br>[0,00; 0,00]    |                        |
| Witt 2009                    | 229230                   | 0.52<br>[0.4944; 0.55]                             | 0.27<br>[0.25; 0.29]    | 0,08<br>[0,07; 0,09]    | 0,09<br>[0,08; 0,10]      | 0,01<br>[0,00; 0,01]    | 0,09<br>[0,08; 0,11]    | 0,04<br>[0,03; 0,05]    | 0,01<br>[0,00; 0,01]    | 0,02<br>[0,01; 0,02]   |
| Weidenhammer 2008 therapists | 503397                   | 0.03<br>[0.0287; 0.04]                             | 0.42<br>[0.40; 0.43]    |                         |                           | 0,28<br>[0,27; 0,30]    | 0,0197<br>[0,02; 0,02]  |                         |                         |                        |
| <b>Fixed effect</b>          |                          | 0.12<br>[0.11; 0.13]                               |                         | 0,09<br>[0,08; 0,10]    | 0,09<br>[0,08; 0,10]      | 0,11<br>[0,11; 0,12]    | 0,04<br>[0,04; 0,04]    | 0,05<br>[0,04; 0,05]    | 0,00<br>[0,00; 0,01]    | 0,02<br>[0,01; 0,02]   |
| <b>Random effect</b>         |                          | 0.51<br>[0.03; 1.55]                               | 0.40<br>[0.24; 0.61]    | 0,38<br>[0,00; 4,79]    | 0,35<br>[0,00; 35,67]     | 0,22<br>[0,01; 0,67]    | 0,20<br>[0,00; 0,81]    | 0,16<br>[0,00; 0,91]    | 0,14<br>[0,00; 1,16]    | 0,04<br>[0,00; 0,26]   |
| <b>tau<sup>2</sup></b>       |                          | 0.0012                                             | 0.0001                  | 0.0011                  | 0.0029                    | 0.0009                  | 0.0002                  | 0.0001                  | 0.0002                  | 0.0001                 |
| <b>I<sup>2</sup></b>         |                          | 99.6%<br>[99.6%; 99.7%]                            | 96.4%<br>[93.9%; 97.9%] | 94.6%<br>[90.2%; 97.1%] | = 58.2%<br>[0.0%; 90.1%]  | 99.7%<br>[99.7%; 99.8%] | 98.7%<br>[98.2%; 99.1%] | 97.1%<br>[95.3%; 98.2%] | 98.3%<br>[97.3%; 99.0%] | 69.0%<br>[0.0%; 91.0%] |
| <b>p-value Q-test</b>        |                          | < 0.0001                                           | < 0.0001                | < 0.0001                | 0.1221                    | < 0.0001                | < 0.0001                | < 0.0001                | < 0.0001                | 0.0398                 |

Online supplementary appendix S6: Risks for different types of adverse events per 100 patients undergoing an acupuncture series as reported in single studies

Summary risk estimates of adverse events (AE) derived from random effects meta-analyses displayed in table 4

| Study            | Total number of treatments | Risk as treatments with AE per 100 treatments [95%-CI] |                         |                         |                           |                         |                         |                           |                         |                                     |                         |
|------------------|----------------------------|--------------------------------------------------------|-------------------------|-------------------------|---------------------------|-------------------------|-------------------------|---------------------------|-------------------------|-------------------------------------|-------------------------|
|                  |                            | Bleeding                                               | Pain                    | Other local AE          | Vegetative nervous system | Aggravation of symptoms | Central nervous system  | Peripheral nervous system | Distant pain            | Gastrointestinal /gynaecological AE | Unclassified AE         |
| Yamashita 2000   | 1441                       | 45.45<br>[42.89; 48.03]                                | 15.75<br>[13.92; 17.68] | 0.90<br>[0.48; 1.46]    | 4.72<br>[3.69; 5.87]      | 1.11<br>[0.63; 1.72]    | 0.35<br>[0.11; 0.72]    |                           | 0.07<br>[0.00; 0.27]    |                                     |                         |
| daSilva 2014     | 13884                      | 4.11<br>[3.79; 4.45]                                   | 3.02<br>[2.74; 3.31]    | 0.43<br>[0.33; 0.55]    | 0.02<br>[0.00; 0.05]      |                         | 0.01<br>[0.00; 0.03]    | 0.11<br>[0.06; 0.17]      |                         | 0.04<br>[0.01; 0.07]                |                         |
| Melchart 1998    | 1200                       | 0.33<br>[0.09; 0.74]                                   | 4.17<br>[3.11; 5.37]    | 0.17<br>[0.02; 0.48]    | 2.58<br>[1.76; 3.56]      | 1.75<br>[1.09; 2.57]    | 0.25<br>[0.05; 0.61]    | 0.08<br>[0.00; 0.33]      | 0.08<br>[0.00; 0.33]    | 0.42<br>[0.13; 0.86]                |                         |
| MacPherson 2005  | 9408                       | 4.72<br>[4.30; 5.16]                                   | 12.27<br>[11.61; 12.94] | 0.26<br>[0.16; 0.37]    | 27.87<br>[26.97; 28.78]   | 1.75<br>[1.50; 2.03]    |                         | 0.35<br>[0.24; 0.48]      | 4.49<br>[4.08; 4.91]    | 1.18<br>[0.97; 1.41]                | 0.35<br>[0.24; 0.48]    |
| Furuse 2017      | 14039                      | 3.16<br>[2.88; 3.46]                                   | 1.25<br>[1.07; 1.44]    | 0.09<br>[0.04; 0.14]    | 0.63<br>[0.51; 0.77]      | 0.20<br>[0.13; 0.28]    | 0.09<br>[0.05; 0.15]    | 0.07<br>[0.03; 0.12]      |                         | 0.10<br>[0.05; 0.16]                | 0.20<br>[0.13; 0.28]    |
| Ernst 2003       | 3535                       | 5.18<br>[4.47; 5.93]                                   | 1.30<br>[0.95; 1.70]    | 0.08<br>[0.02; 0.21]    | 2.46<br>[1.98; 3.00]      | 0.25<br>[0.12; 0.45]    | 1.08<br>[0.76; 1.44]    | 1.44<br>[1.08; 1.86]      |                         | 0.34<br>[0.17; 0.56]                | 5.46<br>[4.74; 6.23]    |
| Odsberg 2001     | 9277                       | 18.44<br>[17.66; 19.24]                                | 0.08<br>[0.03; 0.14]    | 0.05<br>[0.02; 0.11]    | 1.42<br>[1.19; 1.67]      | 2.33<br>[2.03; 2.65]    | 0.18<br>[0.11; 0.28]    | 0.01<br>[0.00; 0.04]      |                         | 0.02<br>[0.00; 0.06]                | 0.06<br>[0.02; 0.13]    |
| Yamashita 1999   | 65482                      | 0.03<br>[0.02; 0.05]                                   | 0.01<br>[0.00; 0.02]    | 0.00<br>[0.00; 0.01]    | 0.00<br>[0.00; 0.01]      | 0.00<br>[0.00; 0.01]    | 0.01<br>[0.00; 0.02]    | 0.00<br>[0.00; 0.01]      |                         | 0.01<br>[0.00; 0.02]                | 0.00<br>[0.00; 0.01]    |
| Park 2009        | 1095                       | 8.40<br>[6.83; 10.12]                                  | 3.38<br>[2.39; 4.53]    |                         | 3.11<br>[2.16; 4.21]      |                         | 0.82<br>[0.37; 1.44]    | 1.46<br>[0.84; 2.26]      |                         |                                     | 0.46<br>[0.14; 0.94]    |
| Leung 2009       | 2000                       | 0.40<br>[0.17; 0.72]                                   |                         |                         |                           |                         |                         |                           |                         |                                     |                         |
| Park 2010        | 3071                       | 1.95<br>[1.49; 2.47]                                   | 0.49<br>[0.27; 0.77]    | 0.10<br>[0.02; 0.24]    | 0.75<br>[0.66; 0.85]      | 0.07<br>[0.01; 0.19]    | 0.03<br>[0.00; 0.13]    | 0.26<br>[0.11; 0.47]      |                         | 0.03<br>[0.00; 0.13]                | 0.03<br>[0.00; 0.13]    |
| White 2001       | 31822                      | 3.09<br>[2.90; 3.28]                                   | 1.15<br>[1.04; 1.27]    | 0.10<br>[0.07; 0.13]    | 4.73<br>[4.50; 4.95]      | 0.98<br>[0.87; 1.09]    | 0.01<br>[0.00; 0.03]    | 0.00<br>[0.00; 0.01]      |                         | 0.02<br>[0.01; 0.04]                | 0.46<br>[0.39; 0.54]    |
| MacPherson 2001  | 34407                      | 2.08<br>[1.93; 2.23]                                   | 1.24<br>[1.12; 1.35]    | 0.01<br>[0.00; 0.02]    | 4.73<br>[4.50; 4.95]      | 2.83<br>[2.66; 3.01]    | 0.63<br>[0.55; 0.71]    |                           | 0.51<br>[0.44; 0.59]    | 0.31<br>[0.25; 0.37]                | 0.86<br>[0.76; 0.96]    |
| Fixed effect     |                            | 1.87<br>[1.80; 1.93]                                   | 0.82<br>[0.78; 0.87]    | 0.05<br>[0.04; 0.06]    | 1.08<br>[1.04; 1.13]      | 0.58<br>[0.55; 0.62]    | 0.09<br>[0.07; 0.10]    | 0.03<br>[0.02; 0.04]      | 0.96<br>[0.87; 1.05]    | 0.08<br>[0.07; 0.09]                | 0.23<br>[0.20; 0.25]    |
| Random effect    |                            | 4.92<br>[1.18; 11.01]                                  | 2.43<br>[0.63; 5.35]    | 0.13<br>[0.04; 0.27]    | 2.24<br>[0.21; 6.35]      | 0.84<br>[0.26; 1.75]    | 0.20<br>[0.05; 0.46]    | 0.19<br>[0.02; 0.55]      | 0.73<br>[0.00; 5.02]    | 0.15<br>[0.03; 0.38]                | 0.47<br>[0.03; 1.46]    |
| tau <sup>2</sup> |                            | 0.0169                                                 | 0.0095                  | 0.0004                  | 0.0213                    | 0.0055                  | 0.0011                  | 0.0008                    | 0.0085                  | 0.0008                              | 0.0025                  |
| I <sup>2</sup>   |                            | 99.9%<br>[99.9%; 99.9%]                                | 99.8%<br>[99.8%; 99.8%] | 96.4%<br>[94.9%; 97.4%] | 99.9%<br>[99.9%; 99.9%]   | 99.7%<br>[99.6%; 99.7%] | 98.4%<br>[97.9%; 98.8%] | 97.5%<br>[96.6%; 98.2%]   | 99.5%<br>[99.4%; 99.7%] | 98.2%<br>[97.6%; 98.6%]             | 99.4%<br>[99.2%; 99.5%] |
| p-value Q-test   |                            | < 0.0001                                               | < 0.0001                | 0.0001                  | < 0.0001                  | < 0.0001                | 0.0001                  | < 0.0001                  | 0.0001                  | 0.0001                              | 0.0001                  |

| Study                  | Total number of treatments | Risk as treatments with AE per 100 treatments [95%-CI] |                        |                        |                           |                         |                         |                   |                         |                      |
|------------------------|----------------------------|--------------------------------------------------------|------------------------|------------------------|---------------------------|-------------------------|-------------------------|-------------------|-------------------------|----------------------|
|                        |                            | Headache                                               | Cardiovascular system  | Motor system           | Generalized skin reaction | Needling malpractice    | Emotional interference  | Sleeping problems | Moxibustion AE          | Respiratory system   |
| Yamashita2000          | 1441                       | 0.14<br>[0.01; 0.40]                                   |                        |                        |                           | 0.62<br>[0.28; 1.10]    |                         |                   |                         |                      |
| daSilva2014            | 13884                      |                                                        |                        |                        |                           | 0.24<br>[0.16; 0.33]    |                         |                   |                         |                      |
| Melchart1998           | 1200                       |                                                        | 0.08<br>[0.00; 0.33]   |                        |                           |                         | 0.08<br>[0.00; 0.33]    |                   |                         |                      |
| MacPherson2005         | 9408                       |                                                        |                        |                        |                           |                         | 0.67<br>[0.51; 0.84]    |                   |                         |                      |
| Furuse2017             | 14039                      | 0.01<br>[0.00; 0.03]                                   | 0.01<br>[0.00; 0.04]   |                        |                           | 0.10<br>[0.05; 0.16]    |                         |                   | 0.17<br>[0.11; 0.25]    |                      |
| Ernst2003              | 3535                       | 0.06<br>[0.01; 0.16]                                   | 0.06<br>[0.01; 0.16]   | 0.03<br>[0.00; 0.11]   |                           |                         | 0.11<br>[0.03; 0.25]    |                   |                         | 0.03<br>[0.00; 0.11] |
| Odsberg2001            | 9277                       | 0.05<br>[0.02; 0.11]                                   |                        | 0.01<br>[0.00; 0.04]   |                           |                         | 0.04<br>[0.01; 0.10]    |                   |                         |                      |
| Yamashita1999          | 65482                      |                                                        |                        |                        |                           | 0.04<br>[0.03; 0.06]    | 0.01<br>[0.00; 0.02]    |                   | 0.01<br>[0.00; 0.02]    |                      |
| Park2009               | 1095                       |                                                        |                        |                        |                           |                         |                         |                   |                         |                      |
| Leung2009              | 2000                       |                                                        |                        |                        |                           |                         |                         |                   |                         |                      |
| Park2010               | 3071                       | 0.03<br>[0.00; 0.13]                                   |                        | 0.10<br>[0.02; 0.24]   |                           | 0.10<br>[0.02; 0.24]    |                         |                   |                         |                      |
| White2001              | 31822                      | 0.11<br>[0.08; 0.15]                                   |                        | 0.00<br>[0.00; 0.01]   |                           | 0.15<br>[0.11; 0.19]    | 0.01<br>[0.00; 0.02]    |                   | 0.00<br>[0.00; 0.01]    |                      |
| MacPherson2001         | 34407                      | 0.00<br>[0.00; 0.01]                                   |                        | 0.00<br>[0.00; 0.01]   |                           | 0.01<br>[0.00; 0.02]    | 0.01<br>[0.00; 0.03]    |                   | 0.00<br>[0.00; 0.01]    |                      |
| <b>Fixed effect</b>    |                            | 0.03<br>[0.02; 0.05]                                   | 0.02<br>[0.01; 0.05]   | 0.01<br>[0.00; 0.01]   |                           | 0.06<br>[0.05; 0.08]    | 0.03<br>[0.02; 0.03]    |                   | 0.01<br>[0.01; 0.02]    |                      |
| <b>Random effect</b>   |                            | 0.04<br>[0.01; 0.10]                                   | 0.03<br>[0.00; 0.13]   | 0.01<br>[0.00; 0.04]   |                           | 0.12<br>[0.02; 0.28]    | 0.08<br>[0.00; 0.27]    |                   | 0.02<br>[0.00; 0.18]    | 0.03<br>[0.00; 0.11] |
| <b>tau<sup>2</sup></b> |                            | 0.0002                                                 | 0.0001                 | 0.0001                 |                           | 0.0002                  | 0.0004                  |                   | 0.0001                  |                      |
| <b>I<sup>2</sup></b>   |                            | 90.3%<br>[82.5%; 94.6%]                                | 21.2%<br>[0.0%; 91.8%] | 58.1%<br>[0.0%; 84.4%] |                           | 95.1%<br>[92.0%; 96.9%] | 96.8%<br>[95.1%; 97.9%] |                   | 95.0%<br>[90.3%; 97.5%] |                      |
| <b>p-value Q-test</b>  |                            | 0.0001                                                 | 0.2811                 | 0.0489                 |                           | 0.0001                  | 0.0001                  |                   | 0.0001                  |                      |

#### Online supplementary appendix S7: Risks for different types of adverse events per 100 treatments as reported in single studies

Summary risk estimates of adverse events (AE) derived from random effects meta-analyses displayed in table 4

# BMJ Open

## Acupuncture related adverse events – systematic review and meta-analyses of prospective clinical studies

|                                 |                                                                                                                                                                                                                                                                                                                                                                                                                                                                               |
|---------------------------------|-------------------------------------------------------------------------------------------------------------------------------------------------------------------------------------------------------------------------------------------------------------------------------------------------------------------------------------------------------------------------------------------------------------------------------------------------------------------------------|
| Journal:                        | <i>BMJ Open</i>                                                                                                                                                                                                                                                                                                                                                                                                                                                               |
| Manuscript ID                   | bmjopen-2020-045961.R2                                                                                                                                                                                                                                                                                                                                                                                                                                                        |
| Article Type:                   | Original research                                                                                                                                                                                                                                                                                                                                                                                                                                                             |
| Date Submitted by the Author:   | 07-Jul-2021                                                                                                                                                                                                                                                                                                                                                                                                                                                                   |
| Complete List of Authors:       | Bäumler, Petra; University Hospital Munich, Multidisciplinary Pain Centre, Department of Anaesthesiology<br>Zhang, Wenyue; Beijing University of Chinese Medicine, School of Acupuncture, Moxibustion and Tuina, Beijing Rehabilitation Hospital<br>Stübinger, Theresa; University Hospital Munich, Multidisciplinary Pain Centre, Department of Anaesthesiology<br>Irnich, Dominik; University Hospital Munich, Multidisciplinary Pain Centre, Department of Anaesthesiology |
| <b>Primary Subject Heading</b>: | Anaesthesia                                                                                                                                                                                                                                                                                                                                                                                                                                                                   |
| Secondary Subject Heading:      | Complementary medicine, Public health                                                                                                                                                                                                                                                                                                                                                                                                                                         |
| Keywords:                       | Adverse events < THERAPEUTICS, Risk management < HEALTH SERVICES ADMINISTRATION & MANAGEMENT, Pain management < ANAESTHETICS, COMPLEMENTARY MEDICINE, GENERAL MEDICINE (see Internal Medicine), Quality in health care < HEALTH SERVICES ADMINISTRATION & MANAGEMENT                                                                                                                                                                                                          |
|                                 |                                                                                                                                                                                                                                                                                                                                                                                                                                                                               |

SCHOLARONE™  
Manuscripts

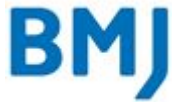

I, the Submitting Author has the right to grant and does grant on behalf of all authors of the Work (as defined in the below author licence), an exclusive licence and/or a non-exclusive licence for contributions from authors who are: i) UK Crown employees; ii) where BMJ has agreed a CC-BY licence shall apply, and/or iii) in accordance with the terms applicable for US Federal Government officers or employees acting as part of their official duties; on a worldwide, perpetual, irrevocable, royalty-free basis to BMJ Publishing Group Ltd ("BMJ") its licensees and where the relevant Journal is co-owned by BMJ to the co-owners of the Journal, to publish the Work in this journal and any other BMJ products and to exploit all rights, as set out in our [licence](#).

The Submitting Author accepts and understands that any supply made under these terms is made by BMJ to the Submitting Author unless you are acting as an employee on behalf of your employer or a postgraduate student of an affiliated institution which is paying any applicable article publishing charge ("APC") for Open Access articles. Where the Submitting Author wishes to make the Work available on an Open Access basis (and intends to pay the relevant APC), the terms of reuse of such Open Access shall be governed by a Creative Commons licence – details of these licences and which [Creative Commons](#) licence will apply to this Work are set out in our licence referred to above.

Other than as permitted in any relevant BMJ Author's Self Archiving Policies, I confirm this Work has not been accepted for publication elsewhere, is not being considered for publication elsewhere and does not duplicate material already published. I confirm all authors consent to publication of this Work and authorise the granting of this licence.



## Acupuncture related adverse events – systematic review and meta-analyses of prospective clinical studies

Petra Bäumlér, Wenyue Zhang, Theresa Stübinger, Dominik Irnich

Multidisciplinary Pain Centre, Department of Anaesthesiology, LMU University Hospital, Munich, Germany

P Bäumlér postdoctoral research assistant

Multidisciplinary Pain Centre, Department of Anaesthesiology, LMU University Hospital, Munich, Germany

D Irnich professor of medicine

Multidisciplinary Pain Centre, Department of Anaesthesiology, LMU University Hospital, Munich, Germany

T Stübinger doctoral graduate

School of Acupuncture, Moxibustion and Tuina, Beijing University of Chinese Medicine & Beijing Rehabilitation Hospital, Beijing, China

W Zhang doctoral graduate

### Corresponding author

Dr. biol. hum. Petra I. Bäumlér, MSc, MPH

Multidisciplinary Pain Centre, Department of Anaesthesiology

LMU University Hospital Munich

Pettenkoferstr. 8a, 80336 Munich

E-mail: Petra.Baeumler@med.uni-muenchen.de

ORCID-ID: 0000-0002-3262-2993

“The Corresponding Author has the right to grant on behalf of all authors and does grant on behalf of all authors, a worldwide licence to the Publishers and its licensees in perpetuity, in all forms, formats and media (whether known now or created in the future), to i) publish, reproduce, distribute, display and store the Contribution, ii) translate the Contribution into other languages, create adaptations, reprints, include within collections and create summaries, extracts and/or, abstracts of the Contribution, iii) create any other derivative work(s) based on the Contribution, iv) to exploit all subsidiary rights in the Contribution, v) the inclusion of electronic links from the Contribution to third party material where-ever it may be located; and, vi) licence any third party to do any or all of the above.”

### Word count

6426

## Abstract

### Objective

Overview on risks for acupuncture related adverse events (AE).

### Design

Systematic review and meta-analysis of prospective studies.

### Data sources

Pubmed, Scopus, and EMBASE from inception date to September 15, 2019.

### Eligibility criteria for selecting studies

Prospective studies assessing AE caused by needle acupuncture in humans as primary outcome published in English or German

### Data extraction and synthesis

Two independent researchers selected articles, extracted the data and assessed study quality. Overall risks and risks for different AE categories were obtained from random effects meta-analyses.

### Main outcomes

Overall risk for minor AE and serious AE (SAE) per patients and per treatments

### Results

A total of 7679 publications were identified. Twenty-two articles reporting on 21 studies were included. Meta-analyses suggest at least one AE occurring in 9.31% (95%-CI 5.10 to 14.62; 11 studies) of patients undergoing an acupuncture series and in 7.57% (95%-CI 1.43 to 17.95; 5 studies) of treatments. Summary risk estimates for SAE were 1.01 (95%-CI 0.23 to 2.33; 11 studies) per 10,000 patients and 7.98 (95%-CI 1.39 to 20.00; 14 studies) per 1 million treatments, for AE requiring treatment 1.14 (95%-CI 0.00 to 7.37; eight studies) per 1000 patients. Heterogeneity was substantial ( $I^2 > 80\%$ ). On average 9.4 AE occurred in 100 treatments. Half of the AE were bleeding, pain, or flare at the needle site that are argued to represent intended acupuncture reaction. AE definitions and assessments varied largely.

### Conclusion

Acupuncture can be considered among the safer treatments in medicine. SAE are rare, and most common minor AE are very mild. AE requiring medical management are uncommon but necessitate medical competence to assure patient safety. Clinical and methodological heterogeneity call for standardized AE assessments tools, clear criteria for differentiating acupuncture related AE from therapeutically desired reactions, and identification of patient related risk factors for AE.

### PROSPERO registration number

CRD42020151930

## Keywords

Adverse effects, adverse reactions, meta-analysis, safety, risk, pneumothorax

### Strengths and limitations of this study

- First systematic review on acupuncture related adverse events including a risk of bias assessment
- First meta-analyses on adverse events related to acupuncture
- Complying with PRISMA guidelines
- Combining studies with heterogeneous AE definitions, but providing respective sensitivity analyses
- Causality assessment based on descriptions of adverse events as available from the included articles

For peer review only

## Introduction

Acupuncture describes the insertion of fine needles at defined points on the patients' body for therapeutic or preventive purposes. It is used worldwide with growing popularity. In the EU acupuncture was identified as the most frequently provided method of complementary and alternative medicine (CAM) with 80,000 physicians and 16,380 non-medical practitioners.(1) In the UK alone 2.3 million traditional acupuncture treatments are carried each year.(2) In the US the number of acupuncturists doubled between 2002 and 2012.(3) The effectiveness of acupuncture is supported by level 1a evidence e.g. for chronic musculoskeletal pain and headache,(4-6) post-operative pain,(7, 8) post-operative nausea and vomiting,(9) as well as allergic rhinitis.(10) Furthermore, promising evidence exists for its potential role in the treatment of numerous other indications, such as stroke rehabilitation,(11) depression,(12) aromatase inhibitor induced arthralgia,(13) and asthma.(14) Thus, acupuncture offers a non-pharmacological treatment option for various highly prevalent conditions with great disease burden and significant health economic impact. Long-term pharmacological treatment of these conditions is often associated with substantial side effects.(15, 16) Consequently, also risk estimates on acupuncture related adverse events (AE) are required for evidence-based risk benefit considerations that are essential for clinical decision making.

However, uncertainty remains about acupuncture safety. AE related to acupuncture are repeatedly and controversially discussed both in scientific literature as well as in public media. An overview of systematic reviews in 2017 (17) illustrates that many of the previous reviews on the safety of acupuncture just summarized case reports or case series. In turn, those reviews including studies that do allow for AE frequency estimation, such as cohort studies and large RCTs, mostly only addressed certain types of AE, particular patient groups, restricted acupuncture regimens, or certain countries. These data are surely important for clinical decision making in particular cases, but leave the overall risk of acupuncture related AE in the general population obscure. Additionally, debate exists about differentiating AE from therapeutically intended reactions that are claimed to form part of the acupuncture treatment. For example, international consensus exists that aggravation of symptoms represents an AE, because disease burden increases. However, transient worsening of symptoms followed by long-term improvements can be interpreted as a so called healing crisis in complementary and alternative medicine.(18) In contrast, such consensus is still missing for local reactions, such as small bleedings upon needle withdrawal, needling pain, and flare around the needling site. These are also interpreted as beneficial signs by acupuncture experts and in standard text books and have been linked to neurophysiological mechanisms of acupuncture. Accordingly, quality and intensity of these events should be considered when classifying them as AE.(19-21)

The last review on prospective studies on AE related to acupuncture with high external validity dates back to 2001,(22) did not meta-analytically summarize AE risk estimates, and did not assess the quality of included studies. In addition, inconsistency and incompleteness of reporting in primary studies hampered the drawing of firm conclusions on acupuncture safety. Since then various large-scale clinical trials and nationwide surveys on acupuncture safety have been conducted.

Therefore, it was the aim of this review to provide an up to date summary of prospective trials that were particularly designed to evaluate AE related to needle acupuncture with manual or electrical stimulation and in combination with or without moxibustion.

## Methods

We systematically reviewed prospective studies that reported on acupuncture related AE. The protocol has been registered at the International prospective register of systematic reviews (PROSPERO) (23) on September 25, 2019 (registration number CRD42020151930; online supplementary appendix S1). The research checklist according to the

1 Preferred Reporting Items for Systematic Reviews and Meta-analyses (PRISMA) (24) and according to the guideline of  
2 Meta-analysis Of Observational Studies in Epidemiology (MOOSE) (25) are displayed in the online supplementary  
3 appendix S2.  
4

#### 5 Search strategy

6 We searched Pubmed, Scopus, and EMBASE for articles published before September 15, 2019 by applying the following  
7 search strategy: 1: acupuncture; 2: "adverse event"; 3:"adverse events"; 4: "adverse effect"; 5: "adverse effects"; #1  
8 AND #2; #1 AND #3; #1 AND #4; #1 AND #5. Additional records were identified from previous reviews on acupuncture  
9 related AE.(17) "Acupuncture" and "adverse effects" are MeSH terms.  
10  
11  
12

#### 13 In- and exclusion criteria

14 We included articles reporting on prospective studies (cohort studies, RCTs, surveys or surveillances) assessing AE  
15 associated with needle acupuncture involving manual or electrical stimulation combined with or without moxibustion  
16 in humans as their primary outcome. Case reports and case series were not included. Only articles published in English  
17 or German were included. Publications on assessments of acupuncture point injection therapies or non-penetrating  
18 acupuncture point stimulation, such as laser acupuncture, acupressure, or transcutaneous electrical nerve stimulation  
19 (TENS), were excluded. We also excluded articles reporting solely on moxibustion or restricted acupuncture regimens  
20 such as press-needle, auricular, or one-point acupuncture. Trials focusing just on one type of acupuncture related AE  
21 or just on a narrowly defined patient population were excluded.  
22  
23  
24  
25  
26

#### 27 Article selection and data extraction

28 Article selection was performed independently by two reviewers (WZ and PB, TS and PB, or LM and PB). Retrieved  
29 records were first screened for eligibility by abstract. Full texts were obtained for the remaining articles. Final decision  
30 about eligibility was obtained by consensus of all four reviewers.  
31  
32

33 Estimates of overall risks and risks for each reported type of AE were extracted as absolute numbers of patients with  
34 AE per total number of patients and treatments with AE per total number of treatments. Data concerning AE from  
35 sham- or placebo-acupuncture treatments were not extracted. The different types of AE were assigned to one of the  
36 following categories: bleeding, local pain, other local AE, distant pain, central nervous system, peripheral nervous  
37 system, vegetative nervous system, motor system, gastrointestinal / gynaecological system, cardiovascular system,  
38 respiratory system, generalized skin reactions, headache, emotional interference, sleeping problems, AE related to  
39 moxibustion, needling malpractice, aggravation of symptoms, other or unclassified AE (online supplementary  
40 appendix S3).  
41  
42  
43  
44

45 Following the differentiation between AE and adverse drug reactions (ADR) defined by the International Conference  
46 on Harmonization (ICH) of Good Clinical Practice,(26) articles were classified into reports on adverse events  
47 irrespective of their causal relationship to acupuncture and adverse reactions for which a causal relationship was a  
48 reasonable possibility. Serious adverse events (SAE) were reported as indicated in the included articles as in  
49 accordance with the ICH-criteria. These include any untoward medical occurrence that at any dose results in death, is  
50 life-threatening, requires inpatient hospitalization or prolongation of existing hospitalization, results in persistent or  
51 significant disability / incapacity, or is a congenital anomaly / birth defect.(26) AE definitions and severity assessments  
52 as stated in the included publications are provided in the online supplementary appendix S4. Causality assessment of  
53 SAE was performed by independent acupuncture therapists who were medical doctors who received more than 300  
54 hours of acupuncture training and with more than ten years of intensive acupuncture practice. As the basis of this  
55 assessment was limited to incomplete information provided in the articles, lacking e.g. time references, the standard  
56  
57  
58  
59  
60

categories of the WHO-UMC causality assessment system (27) were reduced to possibly related to acupuncture, unlikely related to acupuncture, or unclassifiable. AE risk estimates given as patients with AE per total number of patients were interpreted according to the guidelines of the Council for International Organizations of Medical Sciences (CIOMS) as very common ( $\geq 1/10$  patients), common ( $\geq 1/100$  to  $< 1/10$ ), uncommon ( $\geq 1/1,000$  to  $< 1/100$ ), rare ( $\geq 1/10,000$  to  $< 1/1,000$ ), or very rare ( $< 1/10,000$ ). (28)

Documentation of study characteristics included the study type, the country in which the study was conducted, the reporter, the method and the time point of AE assessment, complaints as well as the age and the gender structure of the study population, the average number and the frequency of treatments per patient, the average number of needles per treatment, the needle in time, the acupuncture style, the method of needle stimulation, and the number, the gender, the training, and years of experience of acupuncturists. Data on patients' and acupuncturists' AE reports from the article published by Weidenhammer et al. in 2008 were handled as two separate trials.

#### Risk of bias assessment

Included studies were assessed for risk of bias according to a checklist developed by Faillie and colleagues for systematic reviews focusing on drug adverse events. (29) This checklist is applicable to RCTS, cohort studies, case-control studies, nested case-control studies, and systematic reviews. The questions are structured in eight risk of bias domains. Possible answers are "Not applicable" (n/a), "Yes" (Y), "Unclear" (U), or "No" (N). A summary risk of bias assessment is provided for each domain as well as for the whole study. According to the inclusion criteria of this review, questions concerning systematic reviews, cross-over trials, and case-control studies were not applicable.

#### Data analysis

Data were analysed using the package meta implemented in R. (30) Pooled estimates with 95% confidence intervals (CI) for overall AE risk and risks of different types of AE were obtained from proportion meta-analyses. Random effects models were calculated by the Hartung-Knapp method with arcsine transformation of proportions. Cochran Q test, and  $I^2$  statistics were used to assess the heterogeneity of included studies. Meta-analyses were performed for the overall risks for an AE, for SAE, for AE requiring treatment, and the risks for the different types of AE. Separate meta-analyses were conducted for AE risks given as the number of patients with AE per total number of patients undergoing an acupuncture series and AE risks given as the number of treatments with AE per total number of treatments performed. All studies reporting the respective risks were included in the different meta-analyses. All AE that were reported separately in the articles, but that were allocated to the same AE category, were treated as they had occurred in different patients or treatments, respectively. Sensitivity analyses were performed for studies that explicitly only reported about AE that had, at the discretion of the assessors', a causal relationship to acupuncture treatments. None of the articles reported the mean and variance of the number of AE per treatment. Thus, the expected number of AE per treatment could not be estimated by means of a meta-analysis but just by considering the sum of AE relative to the sum of treatments. An additional sensitivity analysis was performed by excluding AE that are usually very mild and transient or are often argued to be part of the treatment or a desired treatment response, such as transient bleeding, needle site pain, or a flare around the needle insertion point. AE of such type that were indicated by any means as significant were not excluded from this sensitivity analysis.

#### Patient and public involvement

No patients were involved in defining the research question, the outcome measures, the design, or conduct of this review. No patients were asked to advise on interpretation of results. Authors will share the results during patient seminars and information events. A concise version of the results will be made available for non-profit acupuncture organisations to be presented on their webpages.

## Results

### Study characteristics

7677 records were retrieved from the database search and two were identified from previous reviews on acupuncture related adverse events. 7499 records could be screened by abstract and for 180 articles full-texts were obtained. A total of 22 articles reporting on 21 studies covering 12.9 million treatments met our inclusion criteria (Figure 1).(31-52) In two studies different data assessments on different subpopulations were performed and are treated independently in the present analyses. In one study patient reported AE were assessed after one of the first treatments and three months after treatment,(38, 39) and in one large study AE were documented by therapists and in addition by a subgroup of patients.(46)

Study characteristics are provided in table 1. The four largest trials, which included 100,000 to 500,000 patients treated in over 750,000 acupuncture sessions, were cohort studies performed as part of the German Model Projects on Acupuncture (*Modellvorhaben Akupunktur*).(33, 41, 46, 49) Three nationwide surveys from the UK (described in four articles),(38-40, 48) one in-house surveillance report from Japan,(51) and one summary of AE assessments nested within three Chinese RCTs (52) included two to six thousand patients receiving over 30 thousand treatments, respectively. In three surveys, two from South-Korea,(44, 45) one from Japan, (35) and one from Brazil,(32) around one to two thousand patients were included and treated in up to 14 thousand acupuncture sessions. One nationwide survey conducted in Sweden reported on the risk of AE based on data from over nine thousand acupuncture sessions.(43) In seven studies less than 500 patients receiving a maximum of 3.5 thousand treatments were included; four AE assessments nested within RCTs or clinical trials from China,(36, 47) Hong-Kong,(31) and Sweden,(37) one Japanese (50) and one German survey (34) as well as one German cohort study.(42) In most studies acupuncture was used to treat pain in middle aged patients. In six articles no details on the patients' condition were provided.(34, 35, 40, 43, 48, 50) Two articles reported explicitly on short-term AE after one particular treatment only.(39, 45) All but five articles provided sufficient information to infer that acupuncturists had a firm medical background and / or had received intensive acupuncture training.(34, 36, 37, 42, 43) One German survey also included "other practitioners" most likely non-medical practitioners (*Heilpraktiker*) with non-standardized acupuncture training.(34)

Eight articles described AE reported by patients only (31, 32, 37-39, 45, 46, 49) and seven articles AE reported by acupuncturists only.(33, 40, 41, 44, 46, 48, 51) As before said Weidenhammer et al. described therapists' and patients' reports on AE separately.(46) Zhao et al. combined the AE reports from patients and acupuncturists.(52) In five articles it was explicitly stated that acupuncturists recording the AE also queried their patients about any uncomfortable experience during or after treatment.(34-36, 43, 50) In two trials AE were documented by an independent assessor.(42, 47) In eight of the 22 included articles AE were reported irrespective of their relationship to acupuncture,(31, 33, 34, 37, 40, 48, 51, 52) while descriptions of AE assessments in twelve articles suggest that only AE related to the acupuncture treatment were documented,(32, 35, 36, 38, 39, 42-44, 46, 49, 50) and one article did not provide information about the AE definition.(45) Further discrepancies were found in definitions of certain reactions as therapeutically intended. For example, da Silva et al. did not count aggravation of symptoms as AE, because of difficulties in determining causality as well as severity and because of common notion among practitioners that transient worsening forms part of the acupuncture treatment.(32) In contrast White et al. reported observations of aggravated symptoms as AE, but only those that were not followed by substantial improvements.(48) In contrast, the other articles did not specify aggravation of symptoms further.(33-35, 37, 38, 42, 46, 49, 50) In addition, Endres et al. did report on erythema at the needling site (which was accounted for in the present analysis), but did not include it in their overall AE incidence report, as this can also be regarded as desired acupuncture reaction.(33)



| 1 <sup>st</sup> Author year       | Country     | Study type                          | Patients          |                       |                                                                                                                     | Treatments              |                          |                 |               | Acupuncturists                |                              |                         |                                 | AE assessment          |                                                                   |                                             |
|-----------------------------------|-------------|-------------------------------------|-------------------|-----------------------|---------------------------------------------------------------------------------------------------------------------|-------------------------|--------------------------|-----------------|---------------|-------------------------------|------------------------------|-------------------------|---------------------------------|------------------------|-------------------------------------------------------------------|---------------------------------------------|
|                                   |             |                                     | n total (female)  | Age [a]               | Indication                                                                                                          | n (total)               | n / patient              | n needles       | Stimulation   | n total (n female)            | Medical background           | Acupuncture training    | Acupuncture practice            | Reporter               | Tool                                                              | Time point                                  |
| 1 Chung 2015                      | Hong-Kong   | RCT                                 | 59 (46)*          | 49 ± 10*              | Insomnia in major depressive disorder                                                                               | 531                     | 9 / 3 w                  | 14              | EA            | n.i.                          | TCM doctors                  | n.i.                    | > 3 a                           | P                      | SL & OQ any AE                                                    | after 3rd, 6th, 9th treatment               |
| 2 da Silva 2014                   | Brazil      | Cohort monocentric                  | 1157 (n.i.)       | n.i.                  | Musculoskeletal, emotional & respiratory disorders i.a.                                                             | 13,884                  | 12 <sup>#</sup>          | n.i.            | MA            | n.i.                          | MD                           | in training             | n.i.                            | P                      | SL & OQ AE related to acu.                                        | after each treatment                        |
| 4 Endres 2004                     | Germany     | Cohort nationwide private clinics   | 190,924 (130,974) | f: 58 ± 16 m: 55 ± 15 | Chronic headache, LBP or arthrosis (> 6 m)                                                                          | 1.77 M                  | apx. 10 / 4 - 8 w        | n.i.            | n.i.          | 12,000 (n.i.)                 | MD                           | > 140 h                 | n.i.                            | A                      | SL & OQ any AE                                                    | after last treatment                        |
| 5 Ernst 2003                      | Germany     | Survey private practices            | 409 (279)         | n.i.                  | n.i.                                                                                                                | 3,535                   | f: 9.0 m: 7.9            | n.i.            | n.i.          | 29 (n.i.)                     | MD & other practitioners     | n.i.                    | n.i.                            | A                      | SL & OQ any AE                                                    | after each treatment; at subsequent visit   |
| 6 Furuse 2017                     | Japan       | Survey 8 acupuncture clinics        | 2180 (1288)       | 54 ± 19               | n.i.                                                                                                                | 14,039                  | 6.4 <sup>#</sup>         | n.i.            | MA, EA & Moxa | 232 (93)                      | Japanese lic. acupuncturists | > 3 a                   | 9 ± 10 a                        | A                      | SL                                                                | after each treatment; at subsequent visit   |
| 8 Leung 2009                      | Hong-Kong   | 11 clinical trials (not specified)  | 254 (n.i.)        | n.i.                  | Chronic pain, neurological & urological conditions                                                                  | 2,000                   | n.i.                     | 5 avg.          | MA & EA       | 2 (n.i.)                      | TCM doctors                  | n.i.                    | n.i.                            | A                      | SL                                                                | after each treatment & subsequent visit     |
| 9 List 1992                       | Sweden      | RCT monocentric                     | 29 (n.i.)         | median 40**)          | Craniomandibular disorder                                                                                           | apx. 174                | ≥ 6 / 6 - 8 w            | 12 avg.         | MA & EA       | 1 (0)                         | n.i.                         | n.i.                    | n.i.                            | P                      | SL & OQ any AE                                                    | after last treatment                        |
| 11 MacPherson 2001                | UK          | Survey nationwide private practices | n.i.              | n.i.                  | n.i.                                                                                                                | 34,407                  | n.i.                     | 1 - 20          | n.i.          | 574 (374)                     | MD & physio-therapists       | 1 - 2 a 11% ≥ 3 a 89%   | < 10 a apx. 60% ≥ 10 a apx. 40% | A                      | SL & OQ any AE                                                    | upon recognition                            |
| 13 MacPherson 2004 <sup>A</sup>   | UK          | Survey nationwide private practices | 6,348 (4,821)     | 52 ± 15               | Musculoskeletal, psychological, general, neurological, gynecological, obstetric & respiratory conditions; wellbeing | 30,196                  | 4.8                      | n.i.            | MA & EA       | 638 (406)                     | MD & physio-therapists       | > 3 a                   | < 10 a 58% ≥ 10 a 42%           | P                      | SL & OQ AE related to acu.                                        | 3 m after inclusion                         |
| 14 MacPherson 2005 <sup>A</sup>   |             |                                     | 9,408 (6,961)     | 51                    |                                                                                                                     | 9,408                   | 1                        |                 |               | SL imm. AE AE related to acu. |                              |                         |                                 |                        | After the 1 <sup>st</sup> / one of the 1 <sup>st</sup> treatments |                                             |
| 16 Melchart 1998                  | Germany     | Cohort monocentric                  | 121 (88)          | 54 ± 13               | Mainly chronic pain                                                                                                 | apx. 1,200              | 9.9 ± 4.7                | n.i.            | n.i.          | n.i.                          | TCM doctors                  | n.i.                    | n.i.                            | Independent A asking P | SL & FT AE related to acu.                                        | at subsequent visit                         |
| 17 Melchart 2004                  | Germany     | Cohort nationwide private clinics   | 97,733 (78,675)   | 55 ± 16               | Chronic headache, osteoarthritis, LBP                                                                               | apx. 760,000            | 7.8 ± 2.4                | 12.6 ± 5.1      | n.i.          | 7050 (n.i.)                   | MD                           | > 140 h (19% > 350 h)   | n.i.                            | A                      | SL & FT AE related to acu.                                        | after last treatment                        |
| 18 Odsberg 2001                   | Sweden      | Survey private practices            | n.i.              | n.i.                  | n.i.                                                                                                                | 9,277                   | n.i.                     | n.i.            | MA & EA       | 187 (n.i.)                    | Physio-therapists            | n.i.                    | n.i.                            | A                      | n.i.                                                              | after each treatment                        |
| 20 Park 2009                      | South-Korea | Survey two-centred                  | 1,095 (696)       | 58 ± 13               | Stroke, headache, hypertension, dizziness, i.a.                                                                     | 1,095                   | 1                        | n.i.            | n.i.          | 8 (n.i.)                      | Korean medicine doctor       | n.i.                    | >10a                            | P                      | n.i.                                                              | after 1 arbitrary treatment                 |
| 21 Park 2010                      | South-Korea | Survey private practices            | 2,226 (n.i.)      | n.i.                  | n.i. (patients with AE mainly pain conditions)                                                                      | 3,071                   | 1.4 / ≤ 5 w <sup>#</sup> | n.i.            | n.i.          | 13 (n.i.)                     | Oriental medicine.           | 6 a                     | < 3a 70% ≥ 3a 30%               | A                      | SL AE related to acu.                                             | upon recognition                            |
| 23 Weidenhammer 2008 <sup>B</sup> | Germany     | Cohort nationwide private clinics   | 503,397 (40,5235) | 54 ± 16               | Chronic headache, LBP, osteoarthritis (> 6 m)                                                                       | 4.2 M                   | 8.4 (2.9)                | n.i.            | n.i.          | 9918 (3570)                   | MD                           | 140 h (22% > 350 h)     | n.i.                            | A                      | SL & FT AE related to acu.                                        | after last treatment                        |
| 24                                |             |                                     | 882847 (n.i.)     | n.i.                  |                                                                                                                     | 7.9 M                   | n.i.                     |                 |               | 7                             |                              |                         |                                 |                        | OO - SAE only AE related to acu.                                  | upon recognition                            |
| 25                                |             |                                     | 5,998 (5,072)     | 55 ± 15               |                                                                                                                     | apx. 51582 <sup>#</sup> | 8.6 (3.0)                |                 |               | 9429 (n.i.)                   |                              |                         |                                 |                        | OO AE related to acu.                                             | after last treatment                        |
| 27 Wen 2016                       | China       | RCT monocentric                     | 120 (84)          | 59 ± 7                | Posterior circulation ischemia                                                                                      | 1,680                   | 14 / 3 - 4 w             | ≤ 9             | MA            | 1 (n.i.)                      | n.i.                         | n.i.                    | > 20 a                          | Blinded assessor       | n.i. AE related to acu.                                           | after each treatment                        |
| 28 White 2001                     | UK          | Survey private practices            | n.i.              | n.i.                  | n.i.                                                                                                                | 31,822                  | n.i.                     | n.i.            | n.i.          | 78 (29)***)                   | MD & physio-therapists       | ≤ 100 h 43% > 100 h 57% | ≤ 10 a 65% > 10 a 35%           | A                      | SL & OQ any AE                                                    | upon recognition                            |
| 30 Witt 2009                      | Germany     | Cohort nationwide private clinics   | 229,230 (148,541) | 51 ± 14               | Chronic headache, osteoarthritis, LBP, all. rhinitis, asthma, dysmenorrhoea                                         | 2.2 M                   | 10.2 ± 3.0               | n.i.            | n.i.          | 13579 (5418)                  | MD                           | > 140 h (15% > 350h)    | 6.9 ± 5.3 a                     | P                      | OO AE related to acu.                                             | after last treatment                        |
| 32 Yamashita 1999                 | Japan       | In-house surveillance               | 5,008 (2,804)     | Mostly 40 - 50 a      | Musculoskeletal disorder, miscellaneous complaints                                                                  | 65,482                  | 13 avg.                  | n.i.            | MA, EA & Moxa | 84 (n.i.)                     | Japanese lic. acupuncturists | > 3 a                   | < 1 a 64% ≥ 1 a 36%             | A                      | OO any AE                                                         | upon recognition                            |
| 34 Yamashita 2000                 | Japan       | Survey monocentric                  | 391 (n.i.)        | 12 - 88               | n.i.                                                                                                                | 1,441                   | 3.7 <sup>#</sup>         | 21 <sup>#</sup> | MA & EA       | 7 (n.i.)                      | Japanese lic. acupuncturists | > 3 a                   | n.i.                            | A                      | OO AE related to acu.                                             | after each treatment; at subsequent visit   |
| 35 Zhao 2011                      | China       | 3 RCTs multicenter                  | 1,968 (1,239)     | 39 ± 14               | Migraine, dyspepsia, Bell's palsy                                                                                   | 39,360                  | 20 / 4 w                 | 2 - 5           | MA & EA       | n.i.                          | TCM doctors                  | ≥ 8 a                   | > 10 a                          | P & A                  | SL & OQ any AE                                                    | after each treatment & after last treatment |

Table 1: Study characteristics

AE: adverse event; SAE: serious adverse event; acu: acupuncture; MA: manual acupuncture; EA: electroacupuncture; Moxa: moxibustion; m: male, f: female; LBP: low back pain; MD: medical doctors; lic.: licensed; TCM: Traditional Chinese Medicine; SL: selection list; OQ: open questions, FT: free text; P: patients; A: acupuncturists; imm.: immediate; X ± X: mean ± standard deviation; a: year; w: weeks; h: hours; M: million; avg.: on average; i.a. inter alia; apx.: approximately; n.i.: not indicated; <sup>A</sup>) overlapping study populations from the same survey <sup>B</sup>) reports of patients and therapists separately presented; \*) including one drop out prior to treatment; \*\*) refers to total study population (n=61); \*\*\*) further professional details only provided by 59 acupuncturists; <sup>#</sup>) approximation based on other reported data

### Risk of bias assessment

1  
2 According to the inclusion criteria the study objective was clearly described in all articles (Figure 2, category A). Study  
3 design was clear for all but one article which stated that data were collected in the course of 11 clinical trials without  
4 further specification.(36) Furthermore, all but one AE assessment were free of a run in period. In one RCT the safety  
5 assessment was initiated with a short delay.(37) Both irregularities were rated as unlikely to introduce bias into the  
6 AE documentation. High risk for selection bias (Figure 2, category B) was identified in the four RCTs and the AE  
7 assessment in 11 clinical trials (23% of articles), due to exclusion of patients with comorbidities or bleeding tendency.  
8 In contrast, in all surveys and cohort studies (77%) the risk for selection bias was rated as unclear due to an indistinct  
9 selection of therapists and / or patients, inclusion of voluntarily participating acupuncturists or acupuncturists from  
10 specialized medical centres only. Furthermore, none of the articles stated that patients were naive to acupuncture.  
11 Risk of bias due to study withdrawal or drop-out (Figure 2, category C) was rated as low for all RCTs and two surveys,  
12 that only reported on short-term AE (27%), (39, 45) and as high for one survey (5%), because treatment was ceased  
13 for 40% of the patients with AE.(44) For the remaining studies (68%) the risk of bias due to early treatment termination  
14 was rated as unclear, as withdrawals and drop-outs due to AE were not reported. The risk of information bias regarding  
15 the safety outcome (Figure 2, category D) was rated as high for one study (5%) because of an exclusive documentation  
16 of repeatedly occurring AE (37) and as unclear for all remaining studies (95%). At this, AE reporting by patients or  
17 acupuncturists instead of an independent assessor was classified as an unclear risk for social desirability bias. Further  
18 possible but unclear sources of detection bias were the sole use of a selection list (35, 36, 39, 44) or the sole use of  
19 open questions as AE assessment tool,(49-51) lack of reporting on the AE assessment tool (43, 45, 47), unclear  
20 definition of the safety outcome, and the time-point of the AE assessment (only directly after treatment,(32, 33, 43,  
21 47) only after the last treatment initiation,(37, 38, 41, 46, 49) solely upon recognition (40, 44, 48, 51)). Further risk of  
22 information bias (Figure 2, category E) appeared to be unclear due to poor reporting of treatment details in all but  
23 seven studies (32%).(31, 37, 40, 41, 47, 50, 52) Bias arising from differential care, confounder assessment, and  
24 statistical methods to control for confounding (Figure 2, category F) was rated as low, as crude AE risk estimates and  
25 not relative risks with respect to a comparator group were extracted. The risk of bias due to other statistical methods  
26 (Figure 2, category G) was also rated as low, as reporting of AE incidence was clear and well-structured in all articles.  
27 Bias due to conflict of interest (Figure 2, category H) might be present in four articles (18%) due to funding by  
28 institutions with direct interest in the public acknowledgement of acupuncture.(38, 39, 43, 44) In eight articles (36%)  
29 funding or other conflicts of interest were not described.(34, 36, 37, 40, 42, 48, 50, 51) The ten remaining articles  
30 (45%) included an explicit statement about funding by independent institutions and the absence of other conflicts of  
31 interest. For all studies the overall risk of bias was rated as unclear based on the large proportion of unclear sources  
32 of bias.  
33  
34  
35  
36  
37  
38  
39  
40  
41  
42  
43  
44  
45  
46  
47

### Overall risk of acupuncture related adverse events

48  
49 Eleven studies including 845,637 patients that assessed the overall AE risk as patients with AE among the total number  
50 of patients undergoing an acupuncture series were combined in a meta-analysis. The overall risk for at least one AE  
51 during a series of acupuncture treatments was estimated to be 9.31 (95%-CI 5.10 to 14.62) per 100 patients treated  
52 (Figure 3A). (31, 34, 36, 38, 41, 42, 46, 47, 49, 52) The median number of treatments per patient was 9 (min 4.8; max  
53 14), and the total number of treatments exceeded 7.4 million. Visual inspection neither indicated an association of the  
54 incidence of AE with the number of treatments per acupuncture series nor with the study type (online supplementary  
55 appendix S5). Five studies reported the total number of acupuncture treatments with AE relative to the total number  
56 of treatments performed.(32, 34, 36, 40, 42) Meta-analysis of these studies covering 55,026 treatments in total  
57  
58  
59  
60

resulted in a risk of 7.57 (95%-CI 1.43 to 17.95) treatments with AE per 100 treatments (Figure 3B). Sensitivity analysis of studies reporting on adverse acupuncture reactions and not on AE irrespective of their relationship to acupuncture treatments resulted in similar estimates (32, 36, 38, 40, 41, 46, 47, 49); 8.23 (95%-CI 6.42 to 10.25) patients with at least one AE out of 100 patients (Figure 3C) and 6.08 (95%-CI 0.00 to 38.76) treatment with AE out of 100 treatments (Figure 3D). Heterogeneity for all meta-analyses mentioned above (including the sensitivity analyses) was substantial as indicated by an  $I^2$  between 98% and 100% ( $p < 0.01$ ).

Thirteen articles reported the incidences of different types of AE per treatment (table 2).(32, 34-36, 39, 40, 42-45, 48, 50, 51) The average number of AE per 100 treatments varied between 0.14 and 69.12. In total 18,002 AE were reported in of 190,661 treatments, which makes on average 9.44 AE per 100 treatments. Exclusion of AE that are usually mild and transient or are often argued to be part of the treatment or a desired treatment response, such as transient bleeding, needle site pain, or a flare around the needle insertion point, reduced this number to 4.81 (min - max 0.10 – 36.92) AE per 100 treatments.

| Study           | Number of treatments | Number of AE |                                  | AE incidence per 100 treatments |                                  | Bleeding, pain, flare at needling site as % of all AE |
|-----------------|----------------------|--------------|----------------------------------|---------------------------------|----------------------------------|-------------------------------------------------------|
|                 |                      | total        | excluding bleeding, pain & flare | total                           | excluding bleeding, pain & flare |                                                       |
| Park 2009       | 1095                 | 193          | 64                               | 17.63                           | 5.84                             | 66.84%                                                |
| Ernst 2003      | 3535                 | 632          | 403                              | 17.88                           | 11.40                            | 36.23%                                                |
| Melchart 1998   | 1200                 | 120          | 66                               | 10.00                           | 5.50                             | 45.00%                                                |
| Yamashita 1999  | 65482                | 94           | 67                               | 0.14                            | 0.10                             | 28.72%                                                |
| Yamashita 2000  | 1441                 | 996          | 114                              | 69.12                           | 7.91                             | 88.55%                                                |
| MacPherson 2001 | 34407                | 4544         | 3406                             | 13.21                           | 9.90                             | 25.04%                                                |
| Odsberg 2001    | 9277                 | 2108         | 390                              | 22.72                           | 4.20                             | 81.50%                                                |
| White 2001      | 31822                | 2176         | 820                              | 6.84                            | 2.58                             | 62.32%                                                |
| MacPherson 2005 | 9408                 | 5071         | 3473                             | 53.90                           | 36.92                            | 31.51%                                                |
| Leung 2009      | 2000                 | 8            | 0                                | 0.40                            | 0.00                             | 100.00%                                               |
| Park 2010       | 3071                 | 99           | 26                               | 3.22                            | 0.85                             | 73.74%                                                |
| da Silva 2014   | 13884                | 1107         | 117                              | 7.97                            | 0.84                             | 89.43%                                                |
| Furuse 2017     | 14039                | 854          | 232                              | 6.08                            | 1.65                             | 72.83%                                                |
| Overall         | 190661               | 18002        | 9178                             | 9.44                            | 4.81                             | 49.02%                                                |

Table 2: Number of adverse events (AE) per treatment

### Serious acupuncture related adverse events

SAE were observed in five studies including 1,182,860 patients undergoing 10,570,678 treatments with incidences between two and 40 SAE in 100,000 patients undergoing a treatment series and between two and 99 in one million treatments, respectively.(33, 38, 41, 46, 51) Four articles reported that none of the AE observed in a total of 1,922 patients undergoing 19,005 treatments required medical treatment,(32, 36, 47, 50) and authors of five articles concluded that none of the AE observed in 122,699 treatments fulfilled the ICH-criteria for SAE.(35, 40, 44, 48, 52) Eight articles did not mention SAE or any AE description that allowed for inferences about SAE.(31, 34, 37, 39, 42, 43, 45, 49)

Meta-analyses of the overall risk for a SAE resulted in 1.01 (95%-CI 0.23 to 2.33) patients with SAE in 10,000 patients undergoing an acupuncture series (Figure 4A, 11 studies 1,188,930 patients) and 7.98 (95%-CI 1.39 to 20.00) SAE in one million treatments (Figure 4B, 14 studies 10,712,382 treatments). Exclusion of studies with zero SAE incidences

changed these estimates to 1.47 (95%-CI 0.10 to 4.46) in 10,000 patients suffering from a SAE when undergoing an acupuncture series and 16.90 (95%-CI 0.49 to 56.60) in one million treatments causing an SAE. Sensitivity analyses of studies that only reported reactions with a plausible relationship to acupuncture resulted in risk estimates of 0.45 (95%-CI 0.06. to 1.18) SAE per 10,000 patients (Figure 4C) and 5.45 (95%-CI 0.50 to 15.67) per one million treatments (Figure 4D). Again, heterogeneity between studies included in these two meta-analyses was substantial ( $I^2 > 85\%$ ,  $p < 0.001$ ).

The causality assessment of the 73 SAE conducted by two acupuncture experts (table 3) resulted in 32 SAE (44%) being possibly related to acupuncture. Among those, pneumothorax, strong cardiovascular or vasovagal reactions, and fall or trauma were the most frequent SAE with a frequency of one to three cases in one million treatments each. One article that was not taken into account in the SAE meta-analyses, because observed AE were not categorized in minor AE and SAE, also reported two cases of pneumothorax in over 200,000 patients receiving on average 10 acupuncture treatments.(49) One of the included trials documented deaths occurring in the study population. Nineteen SAE (26%) were rated as unlikely related to acupuncture. Among those were nine deaths observed in one study in patients of an age between 67 and 87 years and related to a pre-existing health conditions.(33) Authors reported that the resulting death rate of 4.71 per 100,000 patients was below the expected death rate derived from population statistics. Other SAE classified as unlikely related to acupuncture were a circulatory reaction with amnesia, suicidal tendencies, acute general infection, a car crash two days after treatment, a malignant parotid tumour, tonic-clonic seizures, and an ophistotonus. Twenty-two SAE (30%), intervertebral disk prolapses and hospitalizations due to pain exacerbation or unknown reasons, were rated as “unclassifiable”.

| <b>Endres 2004</b>                                                                             | <b>Causality</b> | <b>n</b> | <b>Melchart 2004</b>                                                                                                         | <b>Causality</b> | <b>n</b> |
|------------------------------------------------------------------------------------------------|------------------|----------|------------------------------------------------------------------------------------------------------------------------------|------------------|----------|
| - Death                                                                                        | unlikely         | 9        | - Exacerbation of depression                                                                                                 | possible         | 1        |
| - Fall or trauma, with or without fracture                                                     | possible         | 4        | - Hypertensive crisis                                                                                                        | possible         | 1        |
| - Acute general infection with hospitalization                                                 | unlikely         | 2        | - Vasovagal reaction                                                                                                         | possible         | 1        |
| - Allergic reaction to concomitant medication (atopy)                                          | possible         | 1        | - Asthma attack with hypertension and angina                                                                                 | possible         | 1        |
| - Stroke with hospitalization                                                                  | unlikely         | 3        | - Pneumothorax                                                                                                               | possible         | 2        |
| - Cardiovascular problems (hospital admission)                                                 | possible         | 3        | <b>Yamashita 1999</b>                                                                                                        | <b>Causality</b> | <b>n</b> |
| - Intervertebral disk prolapse, pain exacerbation with hospital admission                      | unclassifiable   | 5        | - Hospitalization of patient with asthma because of coughing                                                                 | possible         | 1        |
| - Malignant parotid tumor (hospital admission)                                                 | unlikely         | 1        | - 1 case of deep burn that recovered after 2 years                                                                           | possible         | 1        |
| - Hospitalization (unknown reasons)                                                            | unclassifiable   | 17       |                                                                                                                              |                  |          |
| <b>Weidenhammer 2008 ther.</b>                                                                 | <b>Causality</b> | <b>n</b> | <b>MacPherson 2004</b>                                                                                                       | <b>Causality</b> | <b>n</b> |
| - Pneumothorax                                                                                 | possible         | 5        | - Low back pain in breast cancer patient, hospital admission, disappeared without medication, since then no more LBP         | possible         | 1        |
| - Suicidation in a patient with borderline syndrome                                            | unlikely         | 1        | - Car crash 2d after acupuncture, very little sleep the night before                                                         | unlikely         | 1        |
| - Hypertensive crisis                                                                          | possible         | 1        | - Skin rash and feeling ill for several weeks accompanied by decrease of ME symptoms and feeling of catharsis (no treatment) | possible         | 1        |
| - Syncope (vasovagal reaction)                                                                 | possible         | 2        |                                                                                                                              |                  |          |
| - Asthma attack in a patient with asthma                                                       | possible         | 1        |                                                                                                                              |                  |          |
| - Erysipelas (one in a patient with lymphedema)                                                | possible         | 2        |                                                                                                                              |                  |          |
| - Circulatory collapse (one with uncontrolled defecation and one with vertigo and paresthesia) | possible         | 2        |                                                                                                                              |                  |          |
| - Circulatory reaction with amnesia                                                            | unlikely         | 1        |                                                                                                                              |                  |          |
| - Tonic-clonic seizures and ophistotonus                                                       | unlikely         | 1        |                                                                                                                              |                  |          |
| - Infection of the knee joint with E. coli bacteria                                            | possible         | 1        |                                                                                                                              |                  |          |

**Table 3: Causality assessment of serious adverse events as reported in included articles**

The total number of serious adverse events (SAE) as well as the total number of treatments in each study can be identified from figure 4.

### Acupuncture related adverse events requiring treatment

Eight studies determining the number of patients with AE requiring treatment during an acupuncture series included 1,211,791 patients. The meta-analysis of these studies yielded a summary estimate of 1.14 (95%-CI 0.00 to 7.37) in 1000 patients for the risk to suffer from an AE that required treatment when undergoing an acupuncture series (Figure 5). (31, 32, 36, 41, 46, 47, 49, 50) Also here, heterogeneity was substantial ( $I^2$  100%). Two articles, that had defined AE requiring treatment as an SAE criterion, reported lower incidences (two and six events per 100,000 patients) (41, 46) than other two articles, reporting on AE requiring treatment without referring to SAE (1.7 and 2.2 in 100 patients). (31, 49)

### Risk of different types of minor adverse events

Overall risk for the different types of minor AE (categorization see online supplementary appendix S3) were estimated in separated meta-analyses as patients with AE per total number of patients undergoing a treatment series or as treatments with AE per total number of treatments (Table 4). Risks estimated in single studies (online supplementary appendix S6 and S7) varied largely for all types of minor AE. Most frequent and commonly occurring minor AE with summary risk estimates between 1% and 5% of patients undergoing an acupuncture series were bleeding events, pain at the needling site, other local AE, vegetative reactions, aggravation of symptoms, and events related to the central nervous system. Summary risk estimates for bleeding events, needle site pain, vegetative reactions, and aggravation of symptoms also ranged from 1% to 5% of treatments, while meta-analysis of symptoms related to the central nervous system per acupuncture treatment resulted in a risk of two in 1000 treatments. AE estimated to be uncommon with summary risk estimates of one to seven out of 1000 patients undergoing an acupuncture series were symptoms of the peripheral nervous system, pain distant to the needling site, gastrointestinal or gynaecological symptoms, headache, cardiovascular symptoms, affection of the motor system, generalized skin reactions, adverse emotional reactions, and sleeping problems. Symptoms affecting the peripheral nervous system, distant pain, as well as gastrointestinal or gynaecological symptoms were estimated to occur in one to seven out of 1000 treatments; headache, cardiovascular, and motor symptoms as well as adverse emotional reactions only in one to eight out of 10,000 treatments. The risk for respiratory AE was estimated to be rare with a summary risk estimate of four out of 10,000 patients undergoing an acupuncture series and three out of 10,000 treatments. Summary risk estimates for AE caused by therapists' malpractice and burns caused by moxibustion were one to two in 1000 patients undergoing an acupuncture series and two in 10,000 to one in 1000 treatments, respectively.

Some of the studies showed outlying incidences for particular types of minor AE. List et al. observed at least one vegetative reaction in the course of an acupuncture series for craniomandibular disorder in over half of the patients (58.6%), (37) and MacPherson et al. reported vegetative reactions after over a quarter of treatments (27.9%). (39) These findings exceed the frequency of vegetative reactions of up to 13.6% of patients identified in the remaining studies and was mainly based on patient reports of abnormal tiredness after treatment. List et al. also report the highest incidence of aggravation of symptoms with 93% of CMD patients as well as the highest frequency of needle site pain with 44.8 % of patients. This was followed by an RCT with 32.2% of patients suffering needle site pain (31) and a cohort study among chronic pain patients of which 10% suffered aggravation of symptoms after receiving acupuncture. (42) The remaining 19 articles reported incidences smaller than 3% for aggravation of symptoms and 14% for needle site pain.



| Type of AE                               | Number of studies | Sum of patients | Risk as patients with AE per 100 patients [95%-CI] |                      |                         | Tau <sup>2</sup><br>I <sup>2</sup> | Number of studies | Sum of treatments | Risk as treatments with AE per 100 treatments [95%-CI] |                      |                         | Tau <sup>2</sup><br>I <sup>2</sup> |
|------------------------------------------|-------------------|-----------------|----------------------------------------------------|----------------------|-------------------------|------------------------------------|-------------------|-------------------|--------------------------------------------------------|----------------------|-------------------------|------------------------------------|
|                                          |                   |                 | overall                                            | min                  | max                     |                                    |                   |                   | overall                                                | min                  | max                     |                                    |
| Bleeding                                 | 13                | 1038741         | 4.67<br>[2.08; 8.22]                               | 0.48<br>[0.32; 0.67] | 25.18<br>[21.10; 29.50] | 0.0008<br>99.4%**                  | 13                | 190661            | 4.92<br>[1.18; 11.01]                                  | 0.03<br>[0.02; 0.05] | 45.45<br>[42.89; 48.03] | 0.0169<br>99.9%**                  |
| Needle site pain                         | 14                | 1038907         | 3.75<br>[0.74; 8.94]                               | 0.05<br>[0.04; 0.06] | 44.83<br>[27.46; 62.87] | 0.0085<br>99.9%**                  | 12                | 188661            | 2.43<br>[0.63; 5.35]                                   | 0.01<br>[0.00; 0.02] | 15.75<br>[13.92; 17.68] | 0.0095<br>99.8%**                  |
| Other local AE                           | 10                | 1034610         | 2.79<br>[0.02; 10.01]                              | 0.15<br>[0.14; 0.16] | 35.59<br>[23.97; 48.14] | 0.0494<br>100.0%*<br>*             | 11                | 187566            | 0.13<br>[0.04; 0.27]                                   | 0.00<br>[0.00; 0.01] | 0.90<br>[0.48; 1.46]    | 0.0004<br>96.4%**                  |
| Vegetative reaction                      | 12                | 1036607         | 1.95<br>[0.40; 4.63]                               | 0.08<br>[0.07; 0.08] | 58.62<br>[40.52; 75.59] | 0.0012<br>99.7%**                  | 12                | 188661            | 2.24<br>[0.21; 6.35]                                   | 0.00<br>[0.00; 0.01] | 27.87<br>[26.97; 28.78] | 0.0213<br>99.9%**                  |
| Aggravation of symptoms                  | 11                | 1036760         | 1.48<br>[0.00; 5.90]                               | 0.08<br>[0.07; 0.09] | 93.10<br>[81.26; 99.30] | 0.0017<br>99.8%**                  | 10                | 173682            | 0.84<br>[0.26; 1.75]                                   | 0.00<br>[0.00; 0.01] | 2.83<br>[2.66; 3.01]    | 0.0055<br>99.7%**                  |
| Central nervous system                   | 9                 | 244553          | 1.45<br>[0.07; 4.51]                               | 0.05<br>[0.00; 0.20] | 37.93<br>[21.45; 55.99] | 0.0018<br>96.3%**                  | 11                | 179253            | 0.20<br>[0.05; 0.46]                                   | 0.01<br>[0.00; 0.02] | 1.08<br>[0.76; 1.44]    | 0.0011<br>98.4%**                  |
| Peripheral nervous system                | 8                 | 433118          | 0.69<br>[0.02; 2.34]                               | 0.08<br>[0.07; 0.10] | 27.59<br>[13.14; 44.96] | 0.0004<br>98.1%**                  | 10                | 152813            | 0.19<br>[0.02; 0.55]                                   | 0.00<br>[0.00; 0.01] | 1.46<br>[0.84; 2.26]    | 0.0008<br>98.0%**                  |
| Distant pain                             | 5                 | 241817          | 0.60<br>[0.21; 1.20]                               | 0.17<br>[0.09; 0.29] | 0.95<br>[0.72; 1.21]    | 0.0005<br>92.6%**                  | 4                 | 46456             | 0.73<br>[0.00; 5.02]                                   | 0.07<br>[0.00; 0.27] | 4.49<br>[4.08; 4.91]    | 0.0085<br>99.5%**                  |
| Gastrointestinal / gynaecological system | 9                 | 747559          | 0.60<br>[0.04; 1.81]                               | 0.01<br>[0.01; 0.02] | 17.24<br>[5.94; 32.83]  | 0.0008<br>99.3%**                  | 10                | 186125            | 0.15<br>[0.03; 0.38]                                   | 0.01<br>[0.00; 0.02] | 1.18<br>[0.97; 1.41]    | 0.0008<br>98.2%**                  |
| Unclassified AE                          | 10                | 1036307         | 0.57<br>[0.01; 1.95]                               | 0.07<br>[0.05; 0.08] | 17.85<br>[14.29; 21.70] | 0.0003<br>99.0%**                  | 9                 | 172136            | 0.47<br>[0.03; 1.46]                                   | 0.00<br>[0.00; 0.01] | 5.46<br>[4.74; 6.23]    | 0.0025<br>99.4%**                  |
| Headache                                 | 9                 | 845745          | 0.51<br>[0.03; 1.55]                               | 0.03<br>[0.03; 0.04] | 13.56<br>[6.10; 23.38]  | 0.0012<br>99.6%**                  | 7                 | 97592             | 0.04<br>[0.01; 0.10]                                   | 0.00<br>[0.00; 0.01] | 1.14<br>[0.01; 0.40]    | 0.0002<br>90.3%**                  |
| Cardiovascular system                    | 5                 | 739155          | 0.40<br>[0.24; 0.61]                               | 0.27<br>[0.25; 0.29] | 0.83<br>[0.00; 3.21]    | 0.0001<br>96.4%**                  | 3                 | 18774             | 0.03<br>[0.00; 0.13]                                   | 0.01<br>[0.00; 0.04] | 0.08<br>[0.00; 0.33]    | 0.0001<br>21.2%                    |
| Motor system                             | 5                 | 237634          | 0.38<br>[0.00; 4.79]                               | 0.08<br>[0.07; 0.09] | 41.38<br>[24.41; 59.48] | 0.0011<br>94.6%**                  | 5                 | 82112             | 0.01<br>[0.00; 0.04]                                   | 0.00<br>[0.00; 0.01] | 0.03<br>[0.00; 0.11]    | 0.0001<br>58.1%*                   |
| Generalized skin reaction                | 2                 | 229289          | 0.35<br>[0.00; 35.67]                              | 0.09<br>[0.08; 0.10] | 1.69<br>[0.00; 6.52]    | 0.0029<br>58.2%                    | -                 | -                 | -                                                      | -                    | -                       | -                                  |
| Needling malpractice                     | 7                 | 1029871         | 0.22<br>[0.01; 0.67]                               | 0.00<br>[0.00; 0.00] | 1.04<br>[0.81; 1.30]    | 0.0009<br>99.7%**                  | 7                 | 164146            | 0.12<br>[0.02; 0.28]                                   | 0.01<br>[0.00; 0.02] | 0.62<br>[0.28; 1.10]    | 0.0002<br>95.1%**                  |
| Emotional interference                   | 6                 | 930429          | 0.20<br>[0.00; 0.81]                               | 0.02<br>[0.02; 0.02] | 1.24<br>[0.99; 1.53]    | 0.0002<br>98.7%**                  | 7                 | 155131            | 0.08<br>[0.00; 0.27]                                   | 0.01<br>[0.00; 0.02] | 0.67<br>[0.51; 0.84]    | 0.0004<br>96.8%**                  |
| Sleeping problems                        | 5                 | 432529          | 0.16<br>[0.00; 0.91]                               | 0.04<br>[0.03; 0.05] | 20.69<br>[8.19; 37.03]  | 0.0001<br>97.1%**                  | -                 | -                 | -                                                      | -                    | -                       | -                                  |
| AE caused by moxibustion                 | 4                 | 428682          | 0.14<br>[0.00; 1.16]                               | 0.00<br>[0.00; 0.00] | 0.96<br>[0.60; 1.42]    | 0.0002<br>98.3%**                  | 4                 | 145750            | 0.02<br>[0.00; 0.18]                                   | 0.00<br>[0.00; 0.01] | 0.17<br>[0.11; 0.25]    | 0.0001<br>95.0%**                  |
| Respiratory system                       | 3                 | 235637          | 0.04<br>[0.00; 0.26]                               | 0.02<br>[0.01; 0.02] | 0.24<br>[0.00; 0.96]    | 0.0001<br>69.0%*                   | 1                 | 3535              | 0.03<br>[0.00; 0.11]                                   | -                    | -                       | -                                  |

Table 4: Summary risk estimated for different types of adverse events

Summary risk estimates of adverse events (AE) derived from random effects meta-analyses; min: minimum; max: maximum; 95%-CI: 95% confidence interval \*: p-value of Q-test for heterogeneity < 0.05; \*\*: p-value of Q-test < 0.00

## 1 Discussion

### 2 Overall risk for acupuncture related adverse events

3 To date this is the first systematic review on prospective studies that provides summary risk estimates for acupuncture  
4 related adverse events derived from meta-analyses. The obtained results suggest that AE can be expected in every  
5 tenth patient that undergoes a series of acupuncture treatments and, overall, in every 13<sup>th</sup> treatment. Minor AE were  
6 common and represented the large majority of reported AE. About half of the reported minor AE are usually mild and  
7 transient or might even be regarded as part of the acupuncture treatment or therapeutically intended reactions  
8 (bleeding, needle site pain, flare around the needle site).(21) SAE can be expected rarely in about every 10,000<sup>th</sup>  
9 patient in the course of an acupuncture series and, overall, in every 125,000<sup>th</sup> treatment. Sensitivity analyses excluding  
10 studies with zero SAE incidences still suggest SAE being rare (every 7000<sup>th</sup> patient and every 60,000<sup>th</sup> treatment)  
11 particularly in comparison to SAE risk associated with pharmacological treatments.(16, 53, 54) AE requiring treatment  
12 occur uncommonly in about every 900<sup>th</sup> treatment, but additional AE are likely to also have involved medical decision-  
13 making about further diagnostics and follow-up. With meta-analyses for the overall risk of acupuncture related AE  
14 covering over 845,637 patients undergoing more than 7.4 million treatments and for the risk of SAE covering more  
15 than 1.2 million patients and 10.6 million treatments, the amount of data is equivalent to that on the safety of e.g.  
16 common analgesics.(55, 56) This work augments insights on acupuncture related adverse events from previous  
17 reviews with either narrow eligibility criteria or focussing on case reports.(17) It includes data from the largest and  
18 most rigorous trials on acupuncture safety e.g. from the large nationwide cohort studies conducted in the UK and  
19 Germany which had not yet been aggregated.(33, 38-41, 46, 48, 49) Thus, our results provide rigorous support for the  
20 previously drawn conclusion (22, 57, 58) that acupuncture is among the safe treatments in medicine with SAE occurring  
21 rarely and half of the common minor AE being mild and transient. The uncommon AE requiring treatment necessitate  
22 solid medical competence of acupuncturists.

### 23 Types of adverse events related to acupuncture and implications for medical education of acupuncturists

24 Common minor AE were bleeding, needle site pain, other local reactions at the needling site, vegetative reactions,  
25 aggravation of symptoms, and AE related to the central nervous system (one to five out of 100 patients). This is in line  
26 with other reviews (22, 59) also on auricular (60) and paediatric acupuncture.(58) All other types of minor AE can be  
27 regarded as uncommon (1 to 7 out of 1000 patients), despite respiratory reactions that occurred very rarely (4 out of  
28 10,000 patients). SAE most often reported were pneumothorax, strong cardiovascular or vasovagal reactions, and fall  
29 or trauma with one to three cases in one million treatments. Several other sometimes fatal SAE repeatedly described  
30 in case reports were not observed in the included studies; e.g. traumatic injuries of inner organs, local and systemic  
31 infections, subarachnoid bleeding, infective endocarditis, and cardiac tamponade.(61-65) This is likely due to the fact  
32 that acupuncturists in most of the studies were well trained, as SAE are claimed to be avoidable by proper acupuncture  
33 training and practice. Concordantly, cases of acupuncture malpractice were uncommon in the included trials.

### 34 Heterogeneity between studies

35 Possible causes of the substantial heterogeneity observed in all meta-analyses are differences in patient populations,  
36 needling regimens, AE definition, and AE assessment. Sensitivity analyses of trials reporting on adverse reactions with  
37 a plausible relationship to acupuncture resulted in only marginally lower overall AE risk estimates, but in a 50% lower  
38 SAE risk per patient and a 30% lower SAE risk per treatment. Reporting of SAE irrespective of the relationship to  
39 acupuncture is surely more conservative but likely to cause risk overestimation. In line with this, the causality of more  
40 than half of the SAE was rated as unlikely or unclassifiable by two independent acupuncture experts.



1 The variety of combinations of further patient treatment and assessment related factors prevented meaningful  
2 subgrouping of studies for additional sensitivity analyses, and the likeliness of their contribution to the observed  
3 heterogeneity makes formal assessment for publication bias unadvisable.(66) However, some distinct observations  
4 are worth to be discussed. Certain patient populations might be at higher risk to experience acupuncture related AE;  
5 e.g. in one study conducted among CMD patients AE were prominently frequent.(37) The role of acupuncture regimens  
6 in explaining heterogeneity could not be determined due to the limited information about number, location, and  
7 stimulation of needles. In contrast, the number of treatments per acupuncture series and study type seemed not to  
8 have impacted reported AE incidences.

9  
10  
11  
12 A further possible cause of heterogeneity are differences in contrasting AE from therapeutically intended reactions  
13 that form part of acupuncture treatment; e.g. in contrast to international consensus, (18) aggravated symptoms were  
14 not or only in part counted as AE in two studies. (32, 48) Local reactions such as bleeding, pain, and flare at the needling  
15 site, that represented half of the AE reported, are referred to as beneficial signs in standard acupuncture textbooks  
16 and by authors themselves.(20, 33) As the principle of acupuncture is to induce endogenous anti-nociceptive  
17 mechanisms and anti-inflammatory humoral responses through micro-trauma of the skin and tissue, it can be argued  
18 that moderate local reactions are indeed desired reactions indicating an induction of regulative processes. Mild pain  
19 and a flare at the needling site have been linked to important neurophysiological mechanisms of acupuncture.(21)  
20 Additionally, aching or soreness at the needling site might be part of the intended deqi sensation (propagated  
21 sensation along the channels) supposedly related to acupuncture effectiveness.(19) The loss of small drops of blood  
22 upon needle withdrawal is interpreted as a sign for the patient's constitution called "excess" or "excess heat" in TCM  
23 terminology and was suggested not to be interpreted as AE.(67) On the other hand, standard text books explicitly  
24 explain needling techniques avoiding pain and bleeding.(20, 68) This debate calls for a uniform internationally  
25 recognized consensus on the definition of local acupuncture reactions as AE e.g. according to their quality and  
26 intensity.

27  
28  
29  
30  
31  
32  
33  
34 In addition, included studies differed in reporters (acupuncturists, patients, acupuncturists also questioning patients,  
35 and independent assessors), the type of documentation (selection list, open questions, or a combination of both), and  
36 assessment time points. Due to the large variability of combinations the individual impact of these factors could not  
37 be estimated, but literature suggests that patients report more AE than therapists,(69) and that open questions  
38 presented to patients lead to lower risk estimates than the presentation of a selection list of possible AE.(31) Thus,  
39 standardized AE assessment methods should be established for acupuncture studies.

#### 40 Risk of bias in included studies

41  
42  
43  
44  
45 Although, large prospective studies are among the most important sources of safety data, they come with the known  
46 risk for information, selection, and confounding bias.(70) Risk of information bias was mostly related to poor reporting  
47 of acupuncture regimens and the discrepancies in AE definition and assessment. This is in line with the shortcoming  
48 identified for reporting of AE in acupuncture randomized controlled trials.(71) Possible causes of selection bias  
49 identified were mainly voluntary participation of practitioners, unsystematic patient selection, and study conductance  
50 in highly specialized institutions. Practical reasons make these causes of selection bias inherent to safety studies. They,  
51 however, are unlikely to importantly impair external validity, considering the large number of patients and treatments,  
52 the variety of countries in which studies were conducted, and the inclusion of different study designs. Future large  
53 scale comparative safety studies along with modern statistical methods for confounder adjustment could be used to  
54 contrast AE risks related acupuncture to AE risks associated with other treatments and to identify patient and  
55 treatment characteristics associated with AE in real world clinical settings.(72)

### Limitations

1  
2 First, it is debatable whether studies should be summarized irrespective of whether AE not necessarily related to  
3 acupuncture or adverse reactions likely caused by acupuncture were reported. In order to provide the most  
4 comprehensive information possible respective sensitivity analyses were conducted. Another limitation with regard  
5 to the inclusion criteria is the restriction to articles published in German or English as many studies on acupuncture  
6 are published in Chinese. Additionally, the risk estimates for the different types of minor adverse events are likely to  
7 be slightly overestimated and should be interpreted as a rough indication that allows to distinguish frequent from less  
8 frequent acupuncture related minor AE. In categorizing the minor AE it was disregarded that several different AE falling  
9 in one category could have occurred in the same patient or during the same treatment. Also, calculations of risks in  
10 treatments with AE per total number of treatments could not adjust for the fact that multiple AE assessments in the  
11 same patient are not independent. Furthermore, zero incidences of certain types of AE were not available. Finally, the  
12 causality assessment presented for SAE is limited to expert opinions and is only based on the information provided in  
13 the respective article. Such an evaluation does not replace a rigorous causality assessment that would involve querying  
14 patients and therapists.

### Clinical implications

21  
22  
23 Patients should be informed that acupuncture commonly causes minor AE, but rarely SAE. Examples for SAE should at  
24 least cover the most frequent ones, pneumothorax and strong cardiovascular or vasovagal reactions potentially  
25 leading to fall or trauma, along with the respective incidence of 1-3 per million treatments. Patients should also be  
26 made aware of the fact that great part of the minor AE are either very mild or even intended effects that indicate a  
27 beneficial physiological reactions. However, they should be encouraged to report any prolonged discomfort or pain  
28 that are to be avoided during treatment. Acupuncturists should carefully balance treatment intensity according to  
29 patients' reactions in order to minimize AE. They should assess local AE upon needle withdrawal and query patients  
30 about AE directly after treatment as well as at the subsequent visit. Therapists should be aware that, although  
31 uncommon, AE requiring treatment can be expected and necessitate medical decision making. Medical competence  
32 is also required for the indication of acupuncture in patients at high risk for AE or those in which AE could lead to  
33 particular aversive outcomes, such as pregnant women, elderly and patients with cardiovascular comorbidities. In  
34 these patients acupuncture can be especially beneficial, as conventional treatments e.g. with analgesics are often  
35 limited by side effects or drug interactions, but selection of acupuncture regimens needs to involve careful risk-benefit  
36 considerations. These medical competences required to provide optimal patient safety should also be reflected by  
37 acupuncture education standards and regulations. At this policy makers should take into account the worldwide  
38 popularity of acupuncture which is likely to further increase as its scientific level of evidence has led to more than 4000  
39 practice guidelines recommending acupuncture for different mostly pain indications.(69)

### **Conclusion**

48  
49  
50 Acupuncture can be considered among the safer treatments in medicine. It rarely causes SAE and the majority of the  
51 common minor AE are very mild. AE requiring medical management are uncommon. For optimal patient safety  
52 acupuncture education standards regulations should reflect that solid medical competence of acupuncturists is  
53 required to manage AE properly and to minimize the risk of malpractice. Clinical and methodological heterogeneity  
54 calls for an international consensus on AE assessment tools in acupuncture studies and criteria for differentiating  
55 acupuncture related AE from therapeutically desired reactions as well as identification of patient related risk factors  
56 for acupuncture related AE. In particular, comparative safety studies are needed to contrast acupuncture to standard  
57 care in its main indications.

## Figure legends

### Figure 1: Flow diagram

Designed according to the preferred reporting items for systematic reviews and meta-analyses (PRISMA)(24)

### Figure 2: Risk of bias assessment

Risk of bias assessment was conducted according to Faillie et al.(29) L – green: low risk of bias, U – yellow: unclear risk of bias, H – red: high risk of bias

### Figure 3: Meta-analyses of the overall risk for acupuncture related adverse events

Summary risk estimates for adverse events (AE) were calculated as the number of patients or treatments with at least one AE relative to the total number of patients or treatments, respectively. Data on AE reports of patients (pat.) and therapists (ther.) from the article published by Weidenhammer et al. in 2008 were handled separately.

### Figure 4: Meta-analyses of the overall risk for serious adverse events related to acupuncture

Summary risk estimates for serious adverse events (SAE) were calculated as the number SAE cases relative to the total number of patients or treatments, respectively. Data from the article published by Weidenhammer et al. in 2008 refer to the AE reports of the therapists (ther.).

### Figure 5: Meta-analyses of the overall risk for adverse events (AE) requiring treatment

Summary risk estimates for AE requiring treatment were calculated as the number of patients with such AE relative to the total number of patients.

## Acknowledgements

We thank Mrs. Luise Möhring (LM) and Dr. Barbara Jopen-Wolff from the Multidisciplinary Pain Center, Department for Anaesthesiology, University Hospital LMU Munich. Mrs. Möhring assisted in article screening and Mrs. Dr. Jopen-Wolff participated in the causality assessment. The contribution of Mrs. Wenyue Zhang during the planning phase was made possible by the support of the China Scholarship Council (CSC) of the LMU Munich.

## Funding

No funding was received for the conduct of this work.

## Competing interests

All authors have completed the ICMJE uniform disclosure form at [http://www.icmje.org/coi\\_disclosure.pdf](http://www.icmje.org/coi_disclosure.pdf) and declare: no support from any organisation for the submitted work; no financial relationships with any organisations that might have an interest in the submitted work in the previous three years. DI reports to receive honorarium and travel costs from non-profit academic organizations, physician chambers and universities for teaching and lecturing and to serve as president of the German Medical Acupuncture Association (Deutsche Ärztegesellschaft für Akupunktur, DÄGfA, a non-profit medical associations). PB declares to receive honorarium and travel costs from non-profit academic organizations and universities for teaching and lecturing and to be member of the scientific advisory board of the DÄGfA. WZ and TS declare: no other relationships or activities that could appear to have influenced the submitted work.

## Authors' contributions

DI, PB and WZ defined the research question as well as in and exclusion criteria for this systematic review. WZ, TS and PB were responsible for article screening, data extraction and classifications of adverse events. TS and PB performed the quality assessment. Questions and discrepancies were discussed among all authors until consent was achieved. PB conducted the meta-analyses and designed table and figures. All authors contributed to drafting the manuscript and approved its final version for publication.

The corresponding author (PB) attests that all listed authors meet authorship criteria and that no others meeting the criteria have been omitted. As the senior author, DI is the guarantor of the work presented in this manuscript. DI accepts full responsibility for the finished article, has access to any data and controlled the decision to publish

## Transparency declaration

The lead author DI affirms that this manuscript is an honest, accurate, and transparent account of the study being reported; that no important aspects of the study have been omitted; and that the review and analyses were conducted as planned.

## Ethical approval

As our work represents an analysis of already published data, approval by an ethics committee was not required.

## Data sharing

The full set of extracted data and the R-code underlying the meta-analyses are available from the corresponding and senior author (Petra.Baeumler@med.uni-muenchen.de, Dominik.Irnich@med.uni-muenchen.de).

## Dissemination to participants and related patient and public communities

Authors plan to disseminate the findings of this review to patients, clinicians, policy makers and the general public through various channels including newsletters, newspapers and magazines. In special regard to patient information, results will be shared during patient seminars and information events, and a concise version of the results will be made available for non-profit acupuncture organisations to be presented on their webpages.

## Trial registration

PROSPERO registration number CRD42020151930. To enable PROSPERO to focus on COVID-19 registrations during the 2020 pandemic, this registration record was automatically published exactly as submitted. It has not been checked for eligibility or for sense by the PROSPERO team.

## References

1. Ammon K, Cardini F, Daig U, Dragan S, Frei-Erb M, Hegyi G, et al. Final Report of CAMbrella Work Package 5 - Helath Technology Assessment (HTA) and a map of CAM provision in the EU. CAMbrella - A pan-European research network for Complementary and Alternative Medicine (CAM); 2013 [updated 17.09.2013]. 14]. Available from: <https://phaidra.univie.ac.at/view/o:300096>.
2. British Acupuncture Council. Acupuncture practitioners in the UK 2016 [updated 2016]. Available from: <https://www.acupuncture.org.uk/public-content/about-the-bacc/4115-acupuncture-practitioners-in-the-uk.html>.
3. Cui J, Wang S, Ren J, Zhang J, Jing J. Use of acupuncture in the USA: changes over a decade (2002-2012). *Acupuncture in medicine : journal of the British Medical Acupuncture Society*. 2017;35(3):200-7.
4. Vickers AJ, Vertosick EA, Lewith G, MacPherson H, Foster NE, Sherman KJ, et al. Acupuncture for Chronic Pain: Update of an Individual Patient Data Meta-Analysis. *J Pain*. 2018;19(5):455-74.
5. Linde K, Allais G, Brinkhaus B, Fei Y, Mehring M, Vertosick EA, et al. Acupuncture for the prevention of episodic migraine. *Cochrane Database Syst Rev*. 2016(6):Cd001218.
6. Linde K, Allais G, Brinkhaus B, Fei Y, Mehring M, Shin BC, et al. Acupuncture for the prevention of tension-type headache. *Cochrane Database Syst Rev*. 2016;4:Cd007587.
7. Tedesco D, Gori D, Desai KR, Asch S, Carroll IR, Curtin C, et al. Drug-Free Interventions to Reduce Pain or Opioid Consumption After Total Knee Arthroplasty: A Systematic Review and Meta-analysis. *JAMA surgery*. 2017;152(10):e172872.
8. Sun Y, Gan TJ, Dubose JW, Habib AS. Acupuncture and related techniques for postoperative pain: a systematic review of randomized controlled trials. *British journal of anaesthesia*. 2008;101(2):151-60.
9. Lee A, Chan SK, Fan LT. Stimulation of the wrist acupuncture point PC6 for preventing postoperative nausea and vomiting. *Cochrane Database Syst Rev*. 2015(11):Cd003281.
10. Feng S, Han M, Fan Y, Yang G, Liao Z, Liao W, et al. Acupuncture for the treatment of allergic rhinitis: a systematic review and meta-analysis. *American journal of rhinology & allergy*. 2015;29(1):57-62.
11. Yang A, Wu HM, Tang JL, Xu L, Yang M, Liu GJ. Acupuncture for stroke rehabilitation. *Cochrane Database Syst Rev*. 2016(8):Cd004131.
12. Smith CA, Armour M, Lee MS, Wang LQ, Hay PJ. Acupuncture for depression. *Cochrane Database Syst Rev*. 2018;3:Cd004046.
13. Hershman DL, Unger JM, Greenlee H, Capodice JL, Lew DL, Darke AK, et al. Effect of Acupuncture vs Sham Acupuncture or Waitlist Control on Joint Pain Related to Aromatase Inhibitors Among Women With Early-Stage Breast Cancer: A Randomized Clinical Trial. *JAMA*. 2018;320(2):167-76.
14. Brinkhaus B, Roll S, Jena S, Icke K, Adam D, Binting S, et al. Acupuncture in Patients with Allergic Asthma: A Randomized Pragmatic Trial. *J Altern Complem Med*. 2017;23(4):268-77.
15. Whiskey E, Taylor D. A review of the adverse effects and safety of noradrenergic antidepressants. *Journal of psychopharmacology (Oxford, England)*. 2013;27(8):732-9.
16. Carter GT, Duong V, Ho S, Ngo KC, Greer CL, Weeks DL. Side effects of commonly prescribed analgesic medications. *Physical medicine and rehabilitation clinics of North America*. 2014;25(2):457-70.
17. Chan MWC, Wu XY, Wu JCY, Wong SYS, Chung VCH. Safety of Acupuncture: Overview of Systematic Reviews. *Sci Rep*. 2017;7(1):3369.
18. White A, Boon H, Alraek T, Lewith G, Liu JP, Norheim AJ, et al. Reducing the risk of complementary and alternative medicine (CAM):Challenges and priorities. *Eur J Integr Med*. 2014;6(4):404-8.
19. Ren YL, Guo TP, Du HB, Zheng HB, Ma TT, Fang L, et al. A survey of the practice and perspectives of chinese acupuncturists on deqi. *Evidence-based complementary and alternative medicine : eCAM*. 2015;2015:684708.
20. Shanghai College of Traditional Medicine. *Acupuncture - a comprehensive text*. Seattle, USA: Eastland Press; 1981.
21. Zhu H. Acupoints Initiate the Healing Process. *Medical acupuncture*. 2014;26(5):264-70.
22. Ernst E, White AR. Prospective studies of the safety of acupuncture: a systematic review. *Am J Med*. 2001;110(6):481-5.
23. University of York Y, UK. International prospective register of systematic reviews (PROSPERO). Available from: <https://www.crd.york.ac.uk/prospero>.
24. Moher D, Liberati A, Tetzlaff J, Altman DG. Preferred reporting items for systematic reviews and meta-analyses: the PRISMA statement. *J Clin Epidemiol*. 2009;62(10):1006-12.



25. Stroup DF, Berlin JA, Morton SC, Olkin I, Williamson GD, Rennie D, et al. Meta-analysis of observational studies in epidemiology: a proposal for reporting. Meta-analysis Of Observational Studies in Epidemiology (MOOSE) group. *Jama*. 2000;283(15):2008-12.
26. European Medicines Agency. Guideline for good clinical practice E6(R2). 2016. Available from: [https://www.ema.europa.eu/en/documents/scientific-guideline/ich-e-6-r2-guideline-good-clinical-practice-step-5\\_en.pdf](https://www.ema.europa.eu/en/documents/scientific-guideline/ich-e-6-r2-guideline-good-clinical-practice-step-5_en.pdf).
27. the UPPSLA MONITORING CENTRE. WHO-UMC system for standardised case causality assessment. 2013. Available from: <https://www.who.int/publications/m/item/WHO-causality-assessment>.
28. Council for International organizations of medical sciences - CIOMS. Guidelines for Preparing Core Clinical-Safety Information on Drugs Second Edition – Report of CIOMS Working Groups III and V. 1999. Available from: <https://cioms.ch/shop/product/guidelines-preparing-core-clinical-safety-information-drugs-second-edition-report-cioms-working-groups-iii-v/>.
29. Faillie JL, Ferrer P, Gouverneur A, Driot D, Berkemeyer S, Vidal X, et al. A new risk of bias checklist applicable to randomized trials, observational studies, and systematic reviews was developed and validated to be used for systematic reviews focusing on drug adverse events. *J Clin Epidemiol*. 2017;86:168-75.
30. Schwarzer G. meta: {A}n {R} package for meta-analysis. *R News*. 2007;7(3):40-5.
31. Chung KF, Yeung WF, Yu YM, Kwok CW, Zhang SP, Zhang ZJ. Adverse Events Related to Acupuncture: Development and Testing of a Rating Scale. *Clin J Pain*. 2015;31(10):922-8.
32. da Silva JBG, Saidah R, Megid CBC, Ramos NA. Adverse events following acupuncture: A prospective survey of 13,884 consultations in a university out-patient acupuncture training clinic in Brazil. *Eur J Integr Med*. 2014;6(4):488-91.
33. Endres HG, Molsberger A, Lungenhausen M, Trampisch HJ. An internal standard for verifying the accuracy of serious adverse event reporting: the example of an acupuncture study of 190,924 patients. *Eur J Med Res*. 2004;9(12):545-51.
34. Ernst G, Strzyz H, Hagmeister H. Incidence of adverse effects during acupuncture therapy—a multicentre survey. *Complementary therapies in medicine*. 2003;11(2):93-7.
35. Furuse N, Shinbara H, Uehara A, Sugawara M, Yamazaki T, Hosaka M, et al. A Multicenter Prospective Survey of Adverse Events Associated with Acupuncture and Moxibustion in Japan. *Medical acupuncture*. 2017;29(3):155-62.
36. Leung PC, Zhang L, Cheng KF. Acupuncture: Complications are preventable not adverse events. *Chin J Integr Med*. 2009;15(3):229-32.
37. List T, Helkimo M. Adverse events of acupuncture and occlusal splint therapy in the treatment of craniomandibular disorders. *CRANIO*. 1992;10(4):318-26.
38. MacPherson H, Scullion A, Thomas KJ, Walters S. Patient reports of adverse events associated with acupuncture treatment: A prospective national survey. *Qual Saf Health Care*. 2004;13(5):349-55.
39. MacPherson H, Thomas K. Short term reactions to acupuncture—a cross-sectional survey of patient reports. *Acupuncture in medicine : journal of the British Medical Acupuncture Society*. 2005;23(3):112-20.
40. MacPherson H, Thomas K, Walters S, Fitter M. A prospective of adverse events and treatment reactions following 34,000 consultations with professional acupuncturist. *Acupuncture in medicine : journal of the British Medical Acupuncture Society*. 2001;19(2):93-102.
41. Melchart D, Weidenhammer W, Streng A, Reitmayr S, Hoppe A, Ernst E, et al. Prospective Investigation of Adverse Effects of Acupuncture in 97 733 Patients. *Arch Intern Med*. 2004;164(1):104-5.
42. Melchart DV, Hager S, Weidenhammer W, Liao JZ, Liu Y, Linde K. Adverse effects and concomitant symptoms associated with acupuncture treatment - A pilot study. *Akupunktur*. 1998;26(2):87-92.
43. Odsberg A, Schill U, Haker E. Acupuncture treatment: side effects and complications reported by Swedish physiotherapists. *Complementary therapies in medicine*. 2001;9(1):17-20.
44. Park JE, Lee MS, Choi JY, Kim BY, Choi SM. Adverse events associated with acupuncture: A prospective survey. *J Altern Complem Med*. 2010;16(9):959-63.
45. Park SU, Ko CN, Bae HS, Jung WS, Moon SK, Cho KH, et al. Short-term reactions to acupuncture treatment and adverse events following acupuncture: A cross-sectional survey of patient reports in Korea. *J Altern Complem Med*. 2009;15(12):1275-83.
46. Weidenhammer W, Streng A, Melchart D, Linde K. Unerwünschte Wirkungen und Komplikationen bei Akupunkturbehandlung: Ergebnisse der großen Beobachtungsstudie im Rahmen des Modellvorhabens der Ersatzkassen. *Dtsch Zeitschrift für Akupunkt*. 2008;51(3):6-14.
47. Wen Y, Zhang C, Zhao XF, Deng SZ, He S, Huang LH, et al. Safety of different acupuncture manipulations for posterior circulation ischemia with vertigo. *Neural Regen Res*. 2016;11(8):1267-73.

48. White A, Hayhoe S, Hart A, Ernst E. Survey of adverse events following acupuncture (SAFA): A prospective study of 32,000 consultations. *Acupuncture in medicine : journal of the British Medical Acupuncture Society*. 2001;19(2):84-92.
49. Witt CM, Pach D, Brinkhaus B, Wruck K, Tag B, Mank S, et al. Safety of acupuncture: Results of a prospective observational study with 229,230 patients and introduction of a medical information and consent form. *Forsch Komplementmed*. 2009;16(2):91-7.
50. Yamashita H, Tsukayama H, Hori N, Kimura T, Tanno Y. Incidence of adverse reactions associated with acupuncture. *J Altern Complem Med*. 2000;6(4):345-50.
51. Yamashita H, Tsukayama H, Tanno Y, Nishijo K. Adverse events in acupuncture and moxibustion treatment: A six-year survey at a national Clinic in Japan. *J Altern Complem Med*. 1999;5(3):229-36.
52. Zhao L, Zhang FW, Li Y, Wu X, Zheng H, Cheng LH, et al. Adverse events associated with acupuncture: Three multicentre randomized controlled trials of 1968 cases in China. *Trials*. 2011;12:no pagination.
53. Degner D, Grohmann R, Kropp S, Ruther E, Bender S, Engel RR, et al. Severe adverse drug reactions of antidepressants: results of the German multicenter drug surveillance program AMSP. *Pharmacopsychiatry*. 2004;37 Suppl 1:S39-45.
54. Singh G. Gastrointestinal complications of prescription and over-the-counter nonsteroidal anti-inflammatory drugs: a view from the ARAMIS database. *Arthritis, Rheumatism, and Aging Medical Information System. American journal of therapeutics*. 2000;7(2):115-21.
55. Trelle S, Reichenbach S, Wandel S, Hildebrand P, Tschannen B, Villiger PM, et al. Cardiovascular safety of non-steroidal anti-inflammatory drugs: network meta-analysis. *Bmj*. 2011;342:c7086.
56. Martin Arias LH, Martin Gonzalez A, Sanz Fadrique R, Salgueiro Vazquez E. Gastrointestinal safety of coxibs: systematic review and meta-analysis of observational studies on selective inhibitors of cyclo-oxygenase 2. *Fundamental & clinical pharmacology*. 2018.
57. Wang C, Tan B, Williams A. Safety and side effects of acupuncture therapy in Australia: A systematic review. *Eur J Integr Med*. 2019.
58. Adams D, Cheng F, Jou H, Aung S, Yasui Y, Vohra S. The safety of pediatric acupuncture: a systematic review. *Pediatrics*. 2011;128(6):e1575-87.
59. Wang CC, Tan JY, Williams A. Safety and side effects of acupuncture therapy in Australia: A systematic review. *Eur J Integr Med*. 2019;27:81-9.
60. Tan JY, Molassiotis A, Wang T, Suen LK. Adverse events of auricular therapy: a systematic review. *Evid Based Complement Alternat Med*. 2014;2014:506758.
61. Zhang J, Shang H, Gao X, Ernst E. Acupuncture-related adverse events: a systematic review of the Chinese literature. *Bull World Health Organ*. 2010;88(12):915-21C.
62. Xu S, Wang L, Cooper E, Zhang M, Manheimer E, Berman B, et al. Adverse events of acupuncture: a systematic review of case reports. *Evid Based Complement Alternat Med*. 2013;2013:581203.
63. He W, Zhao X, Li Y, Xi Q, Guo Y. Adverse events following acupuncture: a systematic review of the Chinese literature for the years 1956-2010. *J Altern Complem Med*. 2012;18(10):892-901.
64. Ernst E, Lee MS, Choi TY. Acupuncture: does it alleviate pain and are there serious risks? A review of reviews. *Pain*. 2011;152(4):755-64.
65. Ullah W, Ahmad A, Mukhtar M, Virk HUH, Sarwar U, Figueredo V. Acupuncture-Related Cardiac Complications: A Systematic Review. *J Invasive Cardiol*. 2019;31(4):E69-E72.
66. Lau J, Ioannidis JP, Terrin N, Schmid CH, Olkin I. The case of the misleading funnel plot. *BMJ*. 2006;333(7568):597-600.
67. Zhu HZ. *Running a Safe and Successful Acupuncture Clinic*. Edinburgh, London, New York, Oxford, Philadelphia, St Louis, Sydney, Toronto: Elsevier - Churchill Livingstone; 2006.
68. Deng L, Gan Y, He S, Ji X, Y. L, Wang R, et al. *Chinese Acupuncture and Moxibustion*. 2nd ed. Beijing, China: Foreign Languages Press; 1999.
69. Schwaneberg T, Witt CM, Roll S, Pach D. Comparing physicians' and patients' reporting on adverse reactions in randomized trials on acupuncture-a secondary data analysis. *BMC Complement Alternat Med*. 2019;19(1):223.
70. Suissa S. Statistical methods in pharmacoepidemiology: advances and challenges. *Stat Methods Med Res*. 2009;18(1):3-6.
71. Capili B, Anastasi JK, Geiger JN. Adverse event reporting in acupuncture clinical trials focusing on pain. *Clin J Pain*. 2010;26(1):43-8.
72. Desai RJ, Franklin JM. Alternative approaches for confounding adjustment in observational studies using weighting based on the propensity score: a primer for practitioners. *Bmj*. 2019;367:l5657.



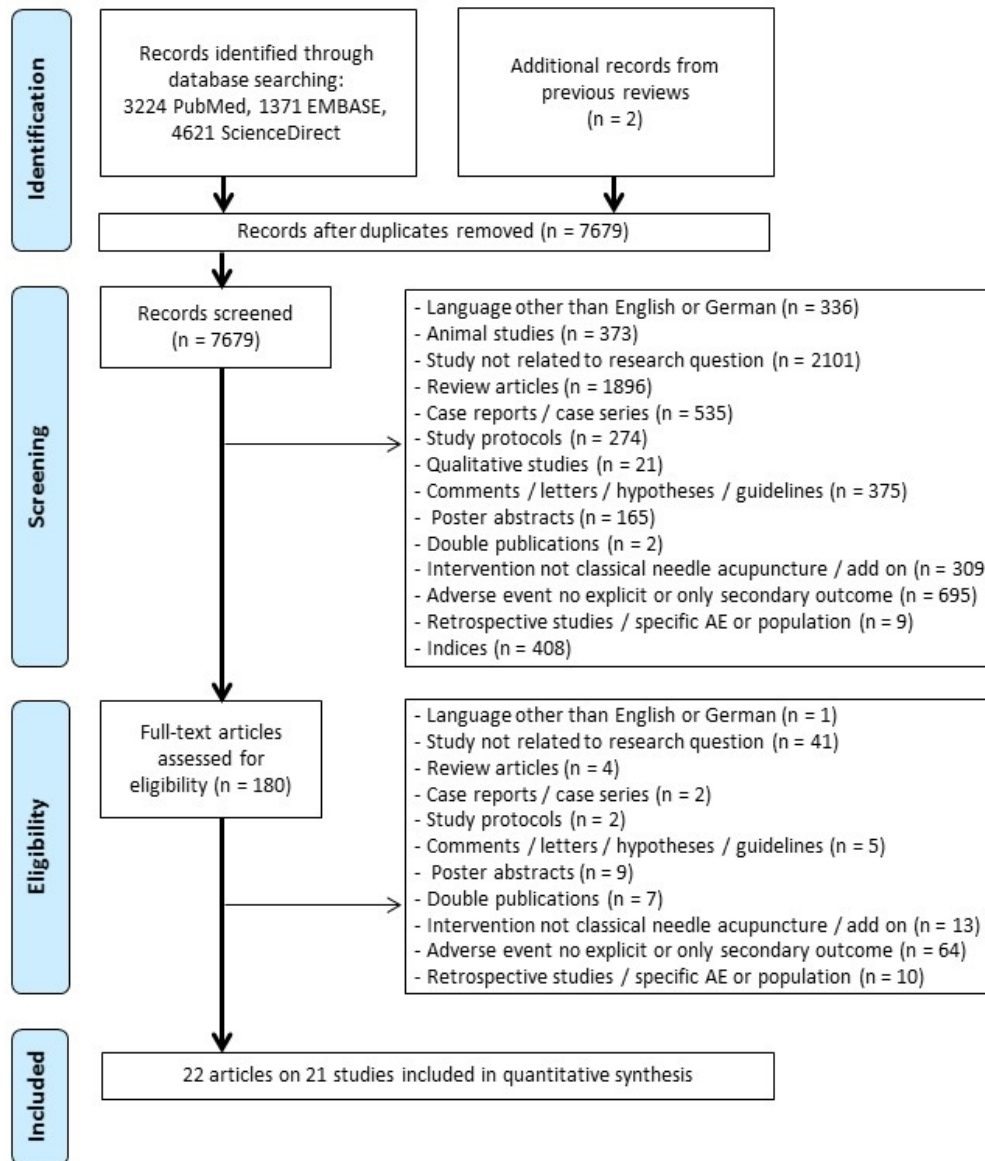

170x200mm (96 x 96 DPI)

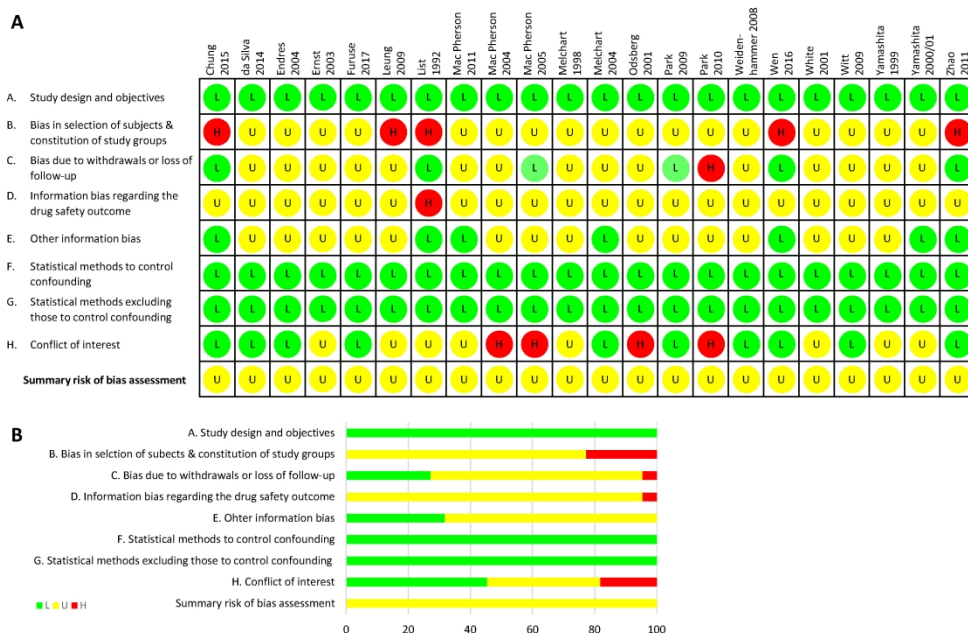

419x297mm (200 x 200 DPI)

**A Overall AE risk among patients undergoing an acupuncture series**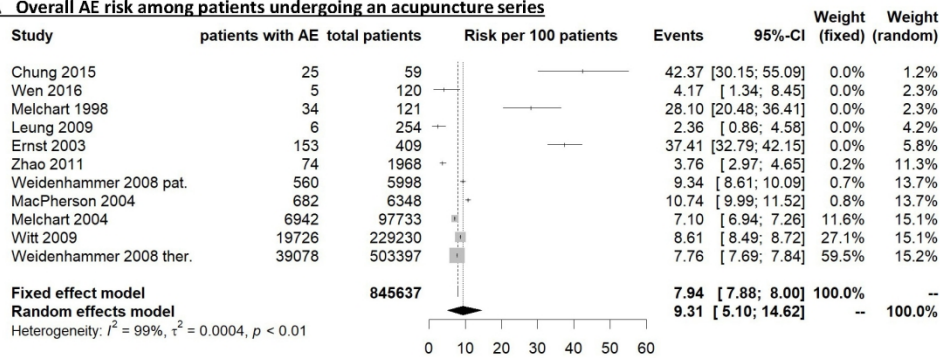**B Overall AE risk per acupuncture treatment**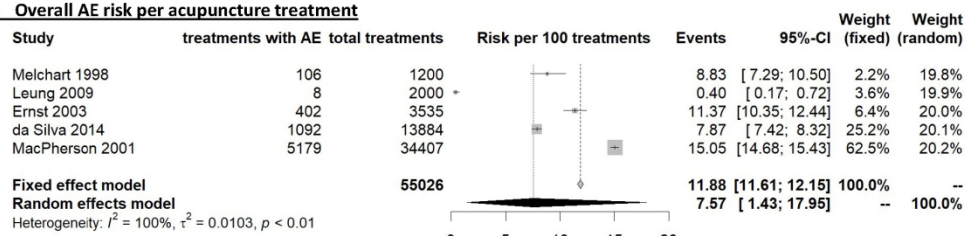**C Overall risk for AE related to acupuncture among patients undergoing a treatment series**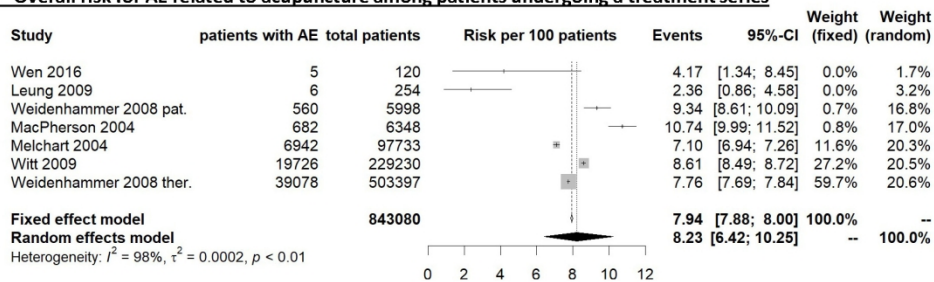**D Overall risk for AE related to acupuncture per treatment**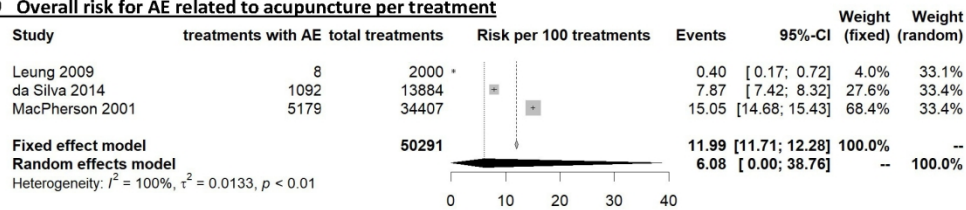

180x210mm (276 x 276 DPI)

**A Overall SAE risk among patients undergoing an acupuncture series**

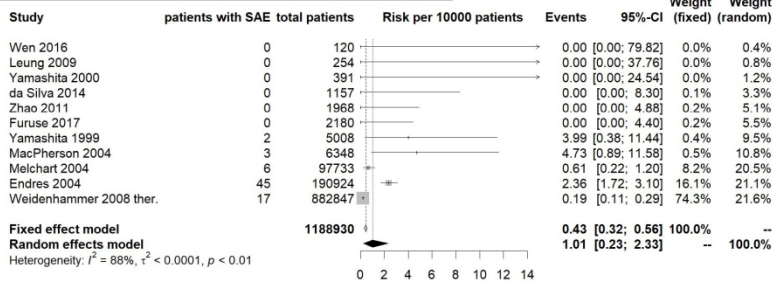

**B Overall SAE risk per acupuncture treatment**



**C Overall risk for SAE related to acupuncture among patients undergoing a treatment series**

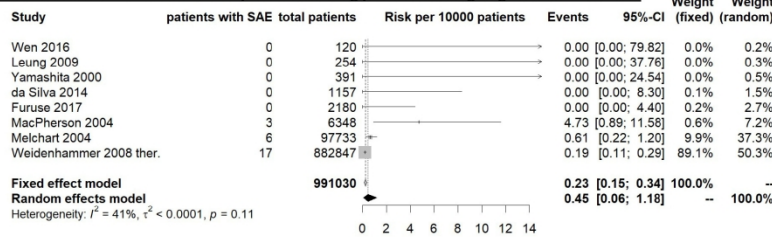

**D Overall risk for SAE related to acupuncture per treatment**



185x257mm (281 x 281 DPI)

1  
2  
3  
4  
5  
6  
7  
8  
9  
10  
11  
12  
13  
14  
15  
16  
17  
18  
19  
20  
21  
22  
23  
24  
25  
26  
27  
28  
29  
30  
31  
32  
33  
34  
35  
36  
37  
38  
39  
40  
41  
42  
43  
44  
45  
46  
47  
48  
49  
50  
51  
52  
53  
54  
55  
56  
57  
58  
59  
60

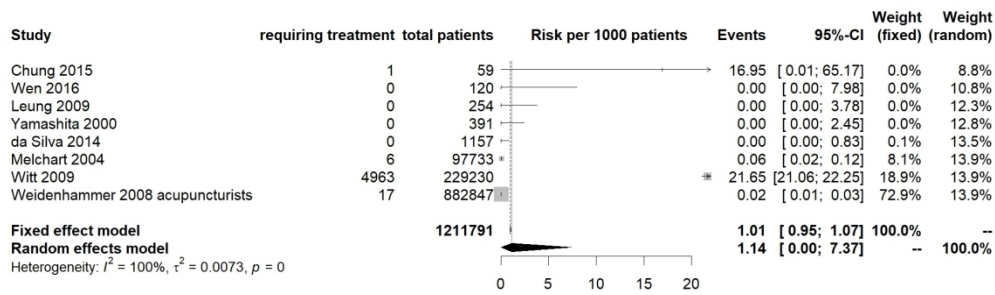

286x82mm (180 x 180 DPI)

**PROSPERO**  
International prospective register of systematic reviews

UNIVERSITY *of* York  
Centre for Reviews and Dissemination

Systematic review

1. \* Review title.

Give the title of the review in English

Acupuncture related adverse events - a systematic review of prospective clinical trials

2. Original language title.

For reviews in languages other than English, give the title in the original language. This will be displayed with the English language title.

English

3. \* Anticipated or actual start date.

Give the date the systematic review started or is expected to start.

19/09/2019

4. \* Anticipated completion date.

Give the date by which the review is expected to be completed.

31/12/2019

5. \* Stage of review at time of this submission.

Tick the boxes to show which review tasks have been started and which have been completed. Update this field each time any amendments are made to a published record.

**Reviews that have started data extraction (at the time of initial submission) are not eligible for inclusion in PROSPERO.** If there is later evidence that incorrect status and/or completion date has been supplied, the published PROSPERO record will be marked as retracted.

This field uses answers to initial screening questions. It cannot be edited until after registration.

The review has not yet started: No

| Review stage                                                    | Started | Completed |
|-----------------------------------------------------------------|---------|-----------|
| Preliminary searches                                            | Yes     | No        |
| Piloting of the study selection process                         | Yes     | No        |
| Formal screening of search results against eligibility criteria | Yes     | No        |
| Data extraction                                                 | No      | No        |
| Risk of bias (quality) assessment                               | No      | No        |
| Data analysis                                                   | No      | No        |



## PROSPERO

### International prospective register of systematic reviews

Provide any other relevant information about the stage of the review here.

Piloting of the study selection process

Piloting of the study selection process

#### 6. \* Named contact.

The named contact is the guarantor for the accuracy of the information in the register record. This may be any member of the review team.

Dr. Petra Bäumlér

#### Email salutation (e.g. "Dr Smith" or "Joanne") for correspondence:

Petra

#### 7. \* Named contact email.

Give the electronic email address of the named contact.

Petra.Baeumler@med.uni-muenchen.de

#### 8. Named contact address

Give the full institutional/organisational postal address for the named contact.

Dr. Petra Bäumlér

Multidisciplinary Pain Center, Department of Anaesthesiology, University Hospital LMU Munich

Pettenkoférstr. 8a

80336 Munich, Germany

#### 9. Named contact phone number.

Give the telephone number for the named contact, including international dialling code.

0049-89-4400-53625

#### 10. \* Organisational affiliation of the review.

Full title of the organisational affiliations for this review and website address if available. This field may be completed as 'None' if the review is not affiliated to any organisation.

Multidisciplinary Pain Center, Department of Anaesthesiology, University Hospital LMU Munich

#### Organisation web address:

#### 11. \* Review team members and their organisational affiliations.

Give the personal details and the organisational affiliations of each member of the review team. Affiliation refers to groups or organisations to which review team members belong. **NOTE: email and country now MUST be entered for each person, unless you are amending a published record.**



## PROSPERO

### International prospective register of systematic reviews

Dr Petra Baeumler. Multidisciplinary Pain Center, Department of Anaesthesiology, University Hospital LMU Munich

Professor Dominik Irnich. Multidisciplinary Pain Center, Department of Anaesthesiology, University Hospital LMU Munich

Mrs Theresa Stübinger. Multidisciplinary Pain Center, Department of Anaesthesiology, University Hospital LMU Munich

#### 12. \* Funding sources/sponsors.

Details of the individuals, organizations, groups, companies or other legal entities who have funded or sponsored the review.

No funding is received

State the funder, grant or award number and the date of award

Grant number(s)

#### 13. \* Conflicts of interest.

List actual or perceived conflicts of interest (financial or academic).

Yes

Petra Bäumlner and Dominik Irnich receive honoraria and travel costs from non-profit academic organizations, physician chamber and universities for teaching and lecturing. Theresa Stübinger declares no conflict of interest

#### 14. Collaborators.

Give the name and affiliation of any individuals or organisations who are working on the review but who are not listed as review team members. **NOTE: email and country must be completed for each person, unless you are amending a published record.**

Dr Wenyue Zhang. School of Acupuncture, Moxibustion and Tuina, Beijing University of Chinese Medicine

#### 15. \* Review question.

State the review question(s) clearly and precisely. It may be appropriate to break very broad questions down into a series of related more specific questions. Questions may be framed or refined using PI(E)COS or similar where relevant.

What is the risk for minor and serious adverse events caused by acupuncture?

What kind of adverse events can be caused by acupuncture?

What is the risk of the different types of acupuncture related adverse events?

#### 16. \* Searches.

State the sources that will be searched (e.g. Medline). Give the search dates, and any restrictions (e.g. language or publication date). Do NOT enter the full search strategy (it may be provided as a link or attachment below.)

Databases: PubMed, Scopus, EMBASE

## PROSPERO

### International prospective register of systematic reviews

Publication period: inception to 15th September 2019

Search Terms: acupuncture, adverse event(s), adverse effect(s)

#### 17. URL to search strategy.

Upload a file with your search strategy, or an example of a search strategy for a specific database, (including the keywords) in pdf or word format. In doing so you are consenting to the file being made publicly accessible. Or provide a URL or link to the strategy. Do NOT provide links to your search **results**.

Alternatively, upload your search strategy to CRD in pdf format. Please note that by doing so you are consenting to the file being made publicly accessible.

Do not make this file publicly available until the review is complete

#### 18. \* Condition or domain being studied.

Give a short description of the disease, condition or healthcare domain being studied in your systematic review.

Acupuncture is the insertion of fine needles at certain points, so called acupuncture points, on the patients body for therapeutic or preventive purposes. Acupuncture originates from ancient Chinese medicine, but is nowadays used worldwide in many different variations. There is level 1 for its effectiveness in acute and chronic pain. Needles are stimulated manually, electrically. Often moxibustion is used as an adjunct. The safety of acupuncture has been debated, and surely needle penetration can cause harms, such as tissue damage, peripheral nerve injury and bleeding. In comparison to analgesic drugs for example, risk and consequences of adverse events are deemed minor, but reviews on the safety of acupuncture are either outdated or lack an assessment of study quality.

#### 19. \* Participants/population.

Specify the participants or populations being studied in the review. The preferred format includes details of both inclusion and exclusion criteria.

Humans treated by needle acupuncture

#### 20. \* Intervention(s), exposure(s).

Give full and clear descriptions or definitions of the interventions or the exposures to be reviewed. The preferred format includes details of both inclusion and exclusion criteria.

Acupuncture involving either manual or electrical needle stimulation with or without moxibustion

#### 21. \* Comparator(s)/control.

Where relevant, give details of the alternatives against which the intervention/exposure will be compared (e.g. another intervention or a non-exposed control group). The preferred format includes details of both inclusion and exclusion criteria.

As the aim of this review is to estimate the crude risk of acupuncture related adverse events, comparator group data are not relevant.

#### 22. \* Types of study to be included.

## PROSPERO

### International prospective register of systematic reviews

Give details of the study designs (e.g. RCT) that are eligible for inclusion in the review. The preferred format includes both inclusion and exclusion criteria. If there are no restrictions on the types of study, this should be stated.

Inclusion criteria:

Prospective study

Primary outcome is the risk of acupuncture related adverse events

Treatment involves acupuncture with needles that are stimulated manually or electrically either in combination with or without moxibustion

Articles published in English or German before 15th of September 2019

Exclusion criteria

Treatment involves injection

Treatment involves skin penetration with any other device than classical acupuncture needles such as press needles, cauterization devices etc.

Treatment is restricted to non-penetrating stimulation such as laser acupuncture, acupressure, transcutaneous electrical nerve stimulation or moxibustion

Treatment is restricted to particular body parts associated with low risk of adverse events such as auricular or one-point acupuncture

### 23. Context.

Give summary details of the setting or other relevant characteristics, which help define the inclusion or exclusion criteria.

### 24. \* Main outcome(s).

Give the pre-specified main (most important) outcomes of the review, including details of how the outcome is defined and measured and when these measurement are made, if these are part of the review inclusion criteria.

## PROSPERO

### International prospective register of systematic reviews

Risk of serious and minor acupuncture related adverse events (AE) as number of AE per treatment and patients with AE per 100.000 patients treated

#### \* Measures of effect

Please specify the effect measure(s) for you main outcome(s) e.g. relative risks, odds ratios, risk difference, and/or 'number needed to treat.

adverse events occurring during or after acupuncture treatment

#### 25. \* Additional outcome(s).

List the pre-specified additional outcomes of the review, with a similar level of detail to that required for main outcomes. Where there are no additional outcomes please state 'None' or 'Not applicable' as appropriate to the review

Type of adverse events caused by acupuncture

Risk of the different types of acupuncture related adverse-events

#### \* Measures of effect

Please specify the effect measure(s) for you additional outcome(s) e.g. relative risks, odds ratios, risk difference, and/or 'number needed to treat.

adverse Events occurring during or after acupuncture treatment

#### 26. \* Data extraction (selection and coding).

Describe how studies will be selected for inclusion. State what data will be extracted or obtained. State how this will be done and recorded.

Incidence of acupuncture related adverse events will be extracted as the number of adverse events per treatment and as number of patients experiencing these adverse events per the total number of patients treated. Data extraction will be performed by two independent reviewers who will extract all available data on acupuncture related adverse events from identified studies. This includes extraction of the total number of and/or patients with minor and serious adverse events as well as extraction of the numbers of and/or patients with all types of adverse events separately in relation to the number of treatments and/or total number of patients treated. The different types of adverse events will be categorized into supersets of adverse events whose risk is calculated separately.

#### 27. \* Risk of bias (quality) assessment.

State which characteristics of the studies will be assessed and/or any formal risk of bias/quality assessment tools that will be used.

Included studies will be assessed for risk of bias according to a checklist developed by Faillie and colleagues for systematic reviews focusing on adverse events.

#### 28. \* Strategy for data synthesis.

Describe the methods you plan to use to synthesise data. This **must not be generic text** but should be **specific to your review** and describe how the proposed approach will be applied to your data. If meta-analysis is planned, describe the models to be used, methods to explore statistical heterogeneity, and software package to be used.

## PROSPERO

### International prospective register of systematic reviews

We will provide the reader with the range (min and max) and the median of the total risk to suffer from an minor and serious adverse event during or after acupuncture treatment that was identified by the studies. The same measures will be provided for the risks of the supersets of adverse events identified from the different studies.

#### 29. \* Analysis of subgroups or subsets.

State any planned investigation of 'subgroups'. Be clear and specific about which type of study or participant will be included in each group or covariate investigated. State the planned analytic approach.

It is likely that certain subsets of patients are at a higher risk for acupuncture related adverse events.

According to the obtained results we will provide characteristics and separate summaries of studies including patients with a high and low risk profile.

#### 30. \* Type and method of review.

Select the type of review, review method and health area from the lists below.

##### Type of review

Cost effectiveness

No

Diagnostic

No

Epidemiologic

No

Individual patient data (IPD) meta-analysis

No

Intervention

No

Meta-analysis

No

Methodology

No

Narrative synthesis

No

Network meta-analysis

No

Pre-clinical

No

Prevention

No

Prognostic

No

Prospective meta-analysis (PMA)

No

Review of reviews

**PROSPERO****International prospective register of systematic reviews**

1  
2  
3  
4 No

5 Service delivery

6 No

7  
8 Synthesis of qualitative studies

9 No

10 Systematic review

11 Yes

12  
13 Other

14 No

**Health area of the review**

15  
16  
17  
18 Alcohol/substance misuse/abuse

19 No

20  
21 Blood and immune system

22 No

23 Cancer

24 No

25 Cardiovascular

26 No

27 Care of the elderly

28 No

29 Child health

30 No

31 Complementary therapies

32 Yes

33 COVID-19

34 No

35 Crime and justice

36 No

37 Dental

38 No

39 Digestive system

40 No

41 Ear, nose and throat

42 No

43 Education

44 No

45 Endocrine and metabolic disorders

46 No

47 Eye disorders

48 No

49 General interest

50 No

51 Genetics

52 No

53 Health inequalities/health equity

54 No

## PROSPERO

### International prospective register of systematic reviews

1 Infections and infestations

2 No

3 International development

4 No

5 Mental health and behavioural conditions

6 No

7 Musculoskeletal

8 No

9 Neurological

10 No

11 Nursing

12 No

13 Obstetrics and gynaecology

14 No

15 Oral health

16 No

17 Palliative care

18 No

19 Perioperative care

20 No

21 Physiotherapy

22 No

23 Pregnancy and childbirth

24 No

25 Public health (including social determinants of health)

26 No

27 Rehabilitation

28 No

29 Respiratory disorders

30 No

31 Service delivery

32 No

33 Skin disorders

34 No

35 Social care

36 No

37 Surgery

38 No

39 Tropical Medicine

40 No

41 Urological

42 No

43 Wounds, injuries and accidents

44 No

45 Violence and abuse

46 No

### 31. Language.

Select each language individually to add it to the list below, use the bin icon to remove any added in error.



## PROSPERO

### International prospective register of systematic reviews

English

There is an English language summary.

#### 32. \* Country.

Select the country in which the review is being carried out. For multi-national collaborations select all the countries involved.

Germany

#### 33. Other registration details.

Name any other organisation where the systematic review title or protocol is registered (e.g. Campbell, or The Joanna Briggs Institute) together with any unique identification number assigned by them. If extracted data will be stored and made available through a repository such as the Systematic Review Data Repository (SRDR), details and a link should be included here. If none, leave blank.

The review has not been registered elsewhere.

#### 34. Reference and/or URL for published protocol.

If the protocol for this review is published provide details (authors, title and journal details, preferably in Vancouver format)

Add web link to the published protocol.

Or, upload your published protocol here in pdf format. Note that the upload will be publicly accessible.

No I do not make this file publicly available until the review is complete

Please note that the information required in the PROSPERO registration form must be completed in full even if access to a protocol is given.

#### 35. Dissemination plans.

Do you intend to publish the review on completion?

Yes

Give brief details of plans for communicating review findings.?

A paper presenting the review results will be submitted to a journal listed in MEDLINE. Furthermore, results will be published at international congresses.

#### 36. Keywords.

Give words or phrases that best describe the review. Separate keywords with a semicolon or new line. Keywords help PROSPERO users find your review (keywords do not appear in the public record but are included in searches). Be as specific and precise as possible. Avoid acronyms and abbreviations unless these are in wide use.

acupuncture, adverse-event, adverse-effect, safety, needling, moxibustion, traditional Chinese medicine

#### 37. Details of any existing review of the same topic by the same authors.

If you are registering an update of an existing review give details of the earlier versions and include a full bibliographic reference, if available.

#### 38. \* Current review status.

Update review status when the review is completed and when it is published. New registrations must be ongoing.

Please provide anticipated publication date

1 **PROSPERO**  
2 **International prospective register of systematic reviews**  
3

4 Review\_Ongoing

5 **39. Any additional information.**  
6

7 Provide any other information relevant to the registration of this review.  
8

9 **40. Details of final report/publication(s) or preprints if available.**

10 Leave empty until publication details are available OR you have a link to a preprint. List authors, title and  
11 journal details preferably in Vancouver format.  
12

13 Give the link to the published review or preprint.  
14  
15  
16  
17  
18  
19  
20  
21  
22  
23  
24  
25  
26  
27  
28  
29  
30  
31  
32  
33  
34  
35  
36  
37  
38  
39  
40  
41  
42  
43  
44  
45  
46  
47  
48  
49  
50  
51  
52  
53  
54  
55  
56  
57  
58  
59  
60

For peer review only



# PRISMA 2009 Checklist

| Section/topic                      | #  | Checklist item                                                                                                                                                                                                                                                                                              | Reported on page # |
|------------------------------------|----|-------------------------------------------------------------------------------------------------------------------------------------------------------------------------------------------------------------------------------------------------------------------------------------------------------------|--------------------|
| <b>TITLE</b>                       |    |                                                                                                                                                                                                                                                                                                             |                    |
| Title                              | 1  | Identify the report as a systematic review, meta-analysis, or both.                                                                                                                                                                                                                                         | 1                  |
| <b>ABSTRACT</b>                    |    |                                                                                                                                                                                                                                                                                                             |                    |
| Structured summary                 | 2  | Provide a structured summary including, as applicable: background; objectives; data sources; study eligibility criteria, participants, and interventions; study appraisal and synthesis methods; results; limitations; conclusions and implications of key findings; systematic review registration number. | 2                  |
| <b>INTRODUCTION</b>                |    |                                                                                                                                                                                                                                                                                                             |                    |
| Rationale                          | 3  | Describe the rationale for the review in the context of what is already known.                                                                                                                                                                                                                              | 4                  |
| Objectives                         | 4  | Provide an explicit statement of questions being addressed with reference to participants, interventions, comparisons, outcomes, and study design (PICOS).                                                                                                                                                  | 4                  |
| <b>METHODS</b>                     |    |                                                                                                                                                                                                                                                                                                             |                    |
| Protocol and registration          | 5  | Indicate if a review protocol exists, if and where it can be accessed (e.g., Web address), and, if available, provide registration information including registration number.                                                                                                                               | 2 / 4 / 19         |
| Eligibility criteria               | 6  | Specify study characteristics (e.g., PICOS, length of follow-up) and report characteristics (e.g., years considered, language, publication status) used as criteria for eligibility, giving rationale.                                                                                                      | 5                  |
| Information sources                | 7  | Describe all information sources (e.g., databases with dates of coverage, contact with study authors to identify additional studies) in the search and date last searched.                                                                                                                                  | 5                  |
| Search                             | 8  | Present full electronic search strategy for at least one database, including any limits used, such that it could be repeated.                                                                                                                                                                               | 5                  |
| Study selection                    | 9  | State the process for selecting studies (i.e., screening, eligibility, included in systematic review, and, if applicable, included in the meta-analysis).                                                                                                                                                   | 5 / 6              |
| Data collection process            | 10 | Describe method of data extraction from reports (e.g., piloted forms, independently, in duplicate) and any processes for obtaining and confirming data from investigators.                                                                                                                                  | 5 / 6              |
| Data items                         | 11 | List and define all variables for which data were sought (e.g., PICOS, funding sources) and any assumptions and simplifications made.                                                                                                                                                                       | 5 - 6              |
| Risk of bias in individual studies | 12 | Describe methods used for assessing risk of bias of individual studies (including specification of whether this was done at the study or outcome level), and how this information is to be used in any data synthesis.                                                                                      | 6                  |
| Summary measures                   | 13 | State the principal summary measures (e.g., risk ratio, difference in means).                                                                                                                                                                                                                               | 6                  |
| Synthesis of results               | 14 | Describe the methods of handling data and combining results of studies, if done, including measures of consistency (e.g., $I^2$ ) for each meta-analysis.                                                                                                                                                   | 6                  |



# PRISMA 2009 Checklist

| Section/topic                 | #  | Checklist item                                                                                                                                                                                           | Reported on page #                                  |
|-------------------------------|----|----------------------------------------------------------------------------------------------------------------------------------------------------------------------------------------------------------|-----------------------------------------------------|
| Risk of bias across studies   | 15 | Specify any assessment of risk of bias that may affect the cumulative evidence (e.g., publication bias, selective reporting within studies).                                                             | 6                                                   |
| Additional analyses           | 16 | Describe methods of additional analyses (e.g., sensitivity or subgroup analyses, meta-regression), if done, indicating which were pre-specified.                                                         | 6                                                   |
| <b>RESULTS</b>                |    |                                                                                                                                                                                                          |                                                     |
| Study selection               | 17 | Give numbers of studies screened, assessed for eligibility, and included in the review, with reasons for exclusions at each stage, ideally with a flow diagram.                                          | 6<br>Figure 1                                       |
| Study characteristics         | 18 | For each study, present characteristics for which data were extracted (e.g., study size, PICOS, follow-up period) and provide the citations.                                                             | 7<br>Table 1                                        |
| Risk of bias within studies   | 19 | Present data on risk of bias of each study and, if available, any outcome level assessment (see item 12).                                                                                                | 9<br>Figure 2A                                      |
| Results of individual studies | 20 | For all outcomes considered (benefits or harms), present, for each study: (a) simple summary data for each intervention group (b) effect estimates and confidence intervals, ideally with a forest plot. | Figure 3 - 5<br>Table 2 / 4<br>Suppl. S6 / S7       |
| Synthesis of results          | 21 | Present results of each meta-analysis done, including confidence intervals and measures of consistency.                                                                                                  | 9 - 12<br>Figure 3 - 5<br>Table 4<br>Suppl. S6 / S7 |
| Risk of bias across studies   | 22 | Present results of any assessment of risk of bias across studies (see Item 15).                                                                                                                          | 9<br>Figure 5 B                                     |
| Additional analysis           | 23 | Give results of additional analyses, if done (e.g., sensitivity or subgroup analyses, meta-regression [see Item 16]).                                                                                    | 9 - 12<br>Figures<br>3C/D 4C/D                      |
| <b>DISCUSSION</b>             |    |                                                                                                                                                                                                          |                                                     |
| Summary of evidence           | 24 | Summarize the main findings including the strength of evidence for each main outcome; consider their relevance to key groups (e.g., healthcare providers, users, and policy makers).                     | 14                                                  |
| Limitations                   | 25 | Discuss limitations at study and outcome level (e.g., risk of bias), and at review-level (e.g., incomplete retrieval of identified research, reporting bias).                                            | 16                                                  |
| Conclusions                   | 26 | Provide a general interpretation of the results in the context of other evidence, and implications for future research.                                                                                  | 14-15                                               |
| <b>FUNDING</b>                |    |                                                                                                                                                                                                          |                                                     |
| Funding                       | 27 | Describe sources of funding for the systematic review and other support (e.g., supply of data); role of funders for the systematic review.                                                               | 18                                                  |

From: Moher D, Liberati A, Tetzlaff J, Altman DG, The PRISMA Group (2009). Preferred Reporting Items for Systematic Reviews and Meta-Analyses: The PRISMA Statement. PLoS Med 6(7): e1000097. doi:10.1371/journal.pmed1000097

For peer review only - <http://bmjopen.bmj.com/site/about/guidelines.xhtml>  
For more information, visit: [www.prisma-statement.org](http://www.prisma-statement.org). Page 2 of 2

## MOOSE Checklist for Meta-analyses of Observational Studies

| Item No                                     | Recommendation                                                                                                                                                                                                                                                               | Reported on Page No                       |
|---------------------------------------------|------------------------------------------------------------------------------------------------------------------------------------------------------------------------------------------------------------------------------------------------------------------------------|-------------------------------------------|
| Reporting of background should include      |                                                                                                                                                                                                                                                                              |                                           |
| 1                                           | Problem definition                                                                                                                                                                                                                                                           | 4                                         |
| 2                                           | Hypothesis statement                                                                                                                                                                                                                                                         | -                                         |
| 3                                           | Description of study outcome(s)                                                                                                                                                                                                                                              | page5 table 1                             |
| 4                                           | Type of exposure or intervention used                                                                                                                                                                                                                                        | page5 table 1                             |
| 5                                           | Type of study designs used                                                                                                                                                                                                                                                   | page5 table 1                             |
| 6                                           | Study population                                                                                                                                                                                                                                                             | page5 table 1                             |
| Reporting of search strategy should include |                                                                                                                                                                                                                                                                              |                                           |
| 7                                           | Qualifications of searchers (eg, librarians and investigators)                                                                                                                                                                                                               | title page                                |
| 8                                           | Search strategy, including time period included in the synthesis and key words                                                                                                                                                                                               | page 5                                    |
| 9                                           | Effort to include all available studies, including contact with authors                                                                                                                                                                                                      | page 5                                    |
| 10                                          | Databases and registries searched                                                                                                                                                                                                                                            | page 5                                    |
| 11                                          | Search software used, name and version, including special features used (eg, explosion)                                                                                                                                                                                      | none                                      |
| 12                                          | Use of hand searching (eg, reference lists of obtained articles)                                                                                                                                                                                                             | page 5                                    |
| 13                                          | List of citations located and those excluded, including justification                                                                                                                                                                                                        | table1<br>figure 1                        |
| 14                                          | Method of addressing articles published in languages other than English                                                                                                                                                                                                      | page 5                                    |
| 15                                          | Method of handling abstracts and unpublished studies                                                                                                                                                                                                                         | figure 1                                  |
| 16                                          | Description of any contact with authors                                                                                                                                                                                                                                      | none                                      |
| Reporting of methods should include         |                                                                                                                                                                                                                                                                              |                                           |
| 17                                          | Description of relevance or appropriateness of studies assembled for assessing the hypothesis to be tested                                                                                                                                                                   | pages 4, 5                                |
| 18                                          | Rationale for the selection and coding of data (eg, sound clinical principles or convenience)                                                                                                                                                                                | page 5                                    |
| 19                                          | Documentation of how data were classified and coded (eg, multiple raters, blinding and interrater reliability)                                                                                                                                                               | page 5                                    |
| 20                                          | Assessment of confounding (eg, comparability of cases and controls in studies where appropriate)                                                                                                                                                                             | n.a.                                      |
| 21                                          | Assessment of study quality, including blinding of quality assessors, stratification or regression on possible predictors of study results                                                                                                                                   | page 6                                    |
| 22                                          | Assessment of heterogeneity                                                                                                                                                                                                                                                  | page 6                                    |
| 23                                          | Description of statistical methods (eg, complete description of fixed or random effects models, justification of whether the chosen models account for predictors of study results, dose-response models, or cumulative meta-analysis) in sufficient detail to be replicated | page 6                                    |
| 24                                          | Provision of appropriate tables and graphics                                                                                                                                                                                                                                 | Tables 1-4,<br>figures 1-5<br>Suppl. S1-7 |
| Reporting of results should include         |                                                                                                                                                                                                                                                                              |                                           |
| 25                                          | Graphic summarizing individual study estimates and overall estimate                                                                                                                                                                                                          | figs 3-5                                  |
| 26                                          | Table giving descriptive information for each study included                                                                                                                                                                                                                 | page 7<br>table 1                         |
| 27                                          | Results of sensitivity testing (eg, subgroup analysis)                                                                                                                                                                                                                       | pages 10-12<br>figures 3-5                |
| 28                                          | Indication of statistical uncertainty of findings                                                                                                                                                                                                                            | pages 10-12<br>figures 3-4                |

| Item No                                 | Recommendation                                                                                                            | Reported on Page No      |
|-----------------------------------------|---------------------------------------------------------------------------------------------------------------------------|--------------------------|
| Reporting of discussion should include  |                                                                                                                           |                          |
| 29                                      | Quantitative assessment of bias (eg, publication bias)                                                                    | pages 14-15<br>Suppl. S4 |
| 30                                      | Justification for exclusion (eg, exclusion of non-English language citations)                                             | page 16                  |
| 31                                      | Assessment of quality of included studies                                                                                 | page 15                  |
| Reporting of conclusions should include |                                                                                                                           |                          |
| 32                                      | Consideration of alternative explanations for observed results                                                            | Pages 14-16              |
| 33                                      | Generalization of the conclusions (ie, appropriate for the data presented and within the domain of the literature review) | page 16                  |
| 34                                      | Guidelines for future research                                                                                            | pages 15 - 16            |
| 35                                      | Disclosure of funding source                                                                                              | page 18                  |

|    |                                          |                                         |                                          |
|----|------------------------------------------|-----------------------------------------|------------------------------------------|
| 1  | <b>Bleeding</b>                          |                                         |                                          |
| 2  | • Bleeding                               | • Small hemorrhage                      | • Ecchymosis or hematoma                 |
| 3  | • Bleeding at needling site              | • Lesion of blood vessel                | accompanied by pain                      |
| 4  | • Mild / transient / minor bleeding      | • Bruising                              | • Ecchymosis or hematoma without         |
| 5  | • Subcutaneous bleeding                  | • Bruising at needling site             | pain                                     |
| 6  | • Hematoma                               | • Mild / transient bruising             | • Petechia or ecchymosis                 |
| 7  | • Minor hematoma                         | • Heavy bruising                        |                                          |
| 8  | • Subcutaneous / superficial hematoma    | • Subcutaneous bruise                   |                                          |
| 9  | <b>Local pain</b>                        |                                         |                                          |
| 10 | • Pain                                   | • Pain upon insertion / stimulation     | • Mild pain at the acupuncture site      |
| 11 | • Needle (-site) pain                    | • Pain while needle was in place        | more than one hour after treatment       |
| 12 | • Pain where needle was inserted / at    | • Pain upon needle withdrawal at the    | • Pain disappearing after > 3 days       |
| 13 | the site of the needle / in the          | acupuncture point                       | • Chest pain (pneumothorax ruled out)    |
| 14 | punctured region                         | • Pain after needle was removed         | • Electroacupuncture problems e.g. too   |
| 15 | • Mild / transient pain at needling site | • Remaining / residual needle site pain | strong current resulting in pain         |
| 16 | • Severe / strong / significant pain at  | • Prolonged / unacceptable pain at      | • Local muscle pain                      |
| 17 | needling site                            | needle site                             | • Unknown pain                           |
| 18 | <b>Other local AE</b>                    |                                         |                                          |
| 19 | • Wheal                                  | • Inflammation at application site      | • Significant rash on abdomen few days   |
| 20 | • (Local) swelling                       | • Itch                                  | after acupuncture                        |
| 21 | • Redness                                | • Itching and redness                   | • Cellulitis after treatment of          |
| 22 | • Flare                                  | • Itching in the punctured region       | edematous leg                            |
| 23 | • Localized erythema                     | • Itching and erythema (suspected       | • Edema in m. tibialis with anterior toe |
| 24 | • Needle-site / local skin reaction      | contact dermatitis)                     | lifting weakness (fully resolved)        |
| 25 | • (Skin) irritation at acupuncture point | • Local allergic reaction (urticaria)   | • Other local AE (around the             |
| 26 | • Skin infection                         | • Needle allergy                        | acupuncture site)                        |
| 27 | • Local (skin) infection                 | • Allergic phenomena / reaction         |                                          |
| 28 | <b>Central nervous system</b>            |                                         |                                          |
| 29 | • Aphasia                                | • Vertigo                               | • Disturbed vision                       |
| 30 | • Dizziness                              | • Disorientation (length unspecified, 1 | • Spontaneous sensory perceptions        |
| 31 | • Mild / transient dizziness             | h, 1 day)                               | • Shivering                              |
| 32 | • Imbalance                              | • Severe disorientation                 | • Seizure shortly after treatment        |
| 33 | • Severe dizziness, vertigo or loss of   | • Disturbed speech                      | • Tremor                                 |
| 34 | balance                                  | • Slurred speech                        |                                          |
| 35 | <b>Peripheral nervous system</b>         |                                         |                                          |
| 36 | • Cold sensation at needling site        | • Prolonged deqi                        | • Hypaesthesia with numbness for         |
| 37 | • Feeling of acupuncture point at        | • Strong acupuncture or heavy           | three days                               |
| 38 | contralateral arm                        | sensation                               | • Insensibility                          |
| 39 | • Paraesthesia                           | • Hypaesthesia                          | • Itching, pins & needles, tingling or   |
| 40 | • Temporary paraesthesia                 | • Numbness                              | burning sensation                        |
| 41 | • Tingling                               | • Numbness in upper extremity           | • Nerve irritation                       |
| 42 | • Tingling, prickling, burning,          | • Numbness and unusual sensation        | • Neuritis                               |
| 43 | dysaesthesia                             | • Severe stiffness or numbness          |                                          |
| 44 | <b>Aggravation of symptoms</b>           |                                         |                                          |
| 45 | • Aggravation                            | • Transient aggravation of symptoms     | • Worsening of condition (after          |
| 46 | • Aggravation of complaints / existing   | • Aggravation of existing symptoms      | removing needles)                        |
| 47 | ailment / existing symptoms              | followed by improvement                 | • Headache and or facial pain            |
| 48 | • Unexpected, severe or prolonged        | • Deterioration / exacerbation of       | • pressure and or tension in the teeth   |
| 49 | worsening of symptoms                    | symptoms                                | • Increased pain                         |
| 50 | • Aggravation of symptoms during         | • General aggravation of symptoms       |                                          |
| 51 | acupuncture session / after treatment    | • Worsening of health state             |                                          |
| 52 | <b>Vegetative nervous system</b>         |                                         |                                          |
| 53 | • (Generalized) sweating                 | • Abnormal tiredness                    | • Significant / severe drowsiness        |
| 54 | • Isolated sweating of hands             | • Severe / significant tiredness or     | • Drowsiness not causing hazard          |
| 55 | • Mild sweating                          | exhaustion                              | • Prolonged drowsiness (one day, one     |
| 56 | • Flushed cheeks and body warmth         | • Lethargy                              | week)                                    |
| 57 | • Hot flash                              | • Dazed                                 | • Drowsiness or restlessness             |
| 58 | • Feeling of warm / heat / cold          | • Vasovagal reaction: collapse,         | • Orthostatic problems                   |
| 59 | • Coldness / feeling cold                | dizziness, nausea & vomiting            | • Malaise                                |
| 60 | • Freezing                               | • Unconsciousness                       | • Poor concentration                     |
| 61 | • (Feeling of) fatigue                   | • Fainting                              | • Dry lips / mouth                       |
| 62 | • Extreme feeling of fatigue             | • Faint / dizzy                         | • Xerostomia                             |
| 63 | • Feeling tired (mild transient)         | • Feel faint / drowsy                   | • Hunger / thirst                        |
| 64 | • Tiredness and exhaustion               | • Feel faint (significant)              |                                          |



|                                                              |                                                                     |                                                       |
|--------------------------------------------------------------|---------------------------------------------------------------------|-------------------------------------------------------|
| <b>Motor system</b>                                          |                                                                     |                                                       |
| • Cramp                                                      | • Heavy legs                                                        | • Joint problems                                      |
| • General muscle tenderness                                  | • Knee went weak                                                    | • Restricted movement                                 |
| • Muscle spasm / tension / weakness                          | • Weakness in legs / legs or arms                                   | • Stiffness                                           |
| <b>Distant pain</b>                                          |                                                                     |                                                       |
| • Pain / ache / discomfort other than at needling site       | • Mild transient pain not at needling site                          | • Generalized muscle pain                             |
| • Reactive pain at other body sites                          | • Chest pain / tightness                                            | • Other / unspecified pain / aches                    |
| <b>Gastrointestinal / gynaecological system</b>              |                                                                     |                                                       |
| • Nausea                                                     | • Tiredness next day after ten hours of diarrhoea (significant)     | • Increased peristalsis                               |
| • Mild and transient nausea                                  | • Stomach ache                                                      | • Loss of appetite                                    |
| • Severe nausea                                              | • Abdominal distension                                              | • Other gastrointestinal complaints                   |
| • Vomiting                                                   | • Impaired bowel function                                           | • Increased haemorrhage during menses                 |
| • Severe vomiting                                            | • Digestive problems                                                | • Menstrual problems                                  |
| • Constipation                                               | • Enteric- / gastrospasm                                            |                                                       |
| • Diarrhoea                                                  |                                                                     |                                                       |
| <b>Cardiovascular system</b>                                 |                                                                     |                                                       |
| • Cardiovascular / circulatory problems                      | • Increase in blood pressure                                        | • Tachycardia                                         |
| • Depression of blood pressure                               | • Palpitation                                                       | • Other cardiac disturbances                          |
| <b>Respiratory system</b>                                    |                                                                     |                                                       |
| • Asthma attack                                              | • Breathing difficulties                                            | • Bronchitis or airway problems                       |
| <b>Generalized skin reactions</b>                            |                                                                     |                                                       |
| • Dermatological problems                                    | • Other dermatological phenomena                                    |                                                       |
| <b>Headache</b>                                              |                                                                     |                                                       |
| • Headache                                                   | • Headache for three days                                           | • Severe headache or migraine                         |
| • Headache the next day                                      | • Migraine attack                                                   |                                                       |
| <b>Emotional interference</b>                                |                                                                     |                                                       |
| • Aggressive behaviour                                       | • Depressive mood                                                   | • Severe emotional outburst and anger at practitioner |
| • Anxiety                                                    | • Discomfort                                                        | • Fear                                                |
| • Anxiety and panic (up to one hour)                         | • Restlessness or nervousness                                       | • Grief / crying / tearful                            |
| • Significant panic with sensation of heat and sweatiness    | • Disorientation, anxiety, nervousness, insomnia or emotional       | • Needle phobia, anxiety and rage                     |
| • Severe panic / agitation / depression with anxiety         | • Emotional /psychological reaction                                 | • (Severe) nightmares                                 |
| • Depressed emotional state or neurovegetative dystonia      | • (Uncontrolled) euphoria                                           | • Other mood swings                                   |
|                                                              | • Significant emotional release (manic, relaxed, rage or confusion) |                                                       |
| <b>Sleeping problems</b>                                     |                                                                     |                                                       |
| • Sleep disturbances                                         | • Severe sleeping problems                                          | • Insomnia                                            |
| • Impaired sleep                                             | • Severe sleeplessness                                              |                                                       |
| <b>Moxa caused adverse events</b>                            |                                                                     |                                                       |
| • Burn injury                                                | • Burns                                                             | • Blister following moxibustion                       |
| <b>Needling malpractice</b>                                  |                                                                     |                                                       |
| • Left alone / unattended in the treatment room for too long | • Failure to remove needle(s)                                       |                                                       |
| • Broken needle                                              | • Forgotten / dropped needle                                        |                                                       |
| • Stuck or bent needle                                       | • Needle lost or forgotten                                          |                                                       |
| <b>Other or unclassified adverse events</b>                  |                                                                     |                                                       |
| • Change of symptoms                                         | • Nose bleeding                                                     | • Additional comments                                 |
| • Illness                                                    | • Miscellaneous symptoms                                            | • Other systematic symptoms                           |
| • Sick                                                       | • Haematuria on next day                                            | • Other neurological problems                         |
| • (Systemic) infection                                       | • Increased urinary frequency                                       | • Others / unspecified / other (mild) adverse events  |
| • Fever                                                      | • Concomitant diseases of recent appearance                         | • other negative reactions                            |
| • Angina                                                     | • Change of taste                                                   | • Unknown due to incomplete record form               |
| • Eye irritation                                             | • Change of weight / weight reduction                               |                                                       |
| • Irritated tongue                                           |                                                                     |                                                       |

### Online supplementary appendix S3: Categorization of adverse events

Subheadings represent the categories to which adverse events (AE) were assigned. AE descriptors extracted from the included publication are reported verbatim or in spirit in order to provide an overview of the different wordings concerning AE type and severity. Slashes indicate that expressions were also used separately. Terms in brackets indicate that such terms were not used in all of the descriptors with otherwise similar wording.

| Study            | AE definition<br>(direct quotes with eventual comments)                                                                                                                                                                                                                                                                                                                                                                                                                                                                                                                                                                                                               | Severity rating<br>(direct quotes with eventual comments)                                                                                                                                                                                                                                                                          |
|------------------|-----------------------------------------------------------------------------------------------------------------------------------------------------------------------------------------------------------------------------------------------------------------------------------------------------------------------------------------------------------------------------------------------------------------------------------------------------------------------------------------------------------------------------------------------------------------------------------------------------------------------------------------------------------------------|------------------------------------------------------------------------------------------------------------------------------------------------------------------------------------------------------------------------------------------------------------------------------------------------------------------------------------|
| Chung 2015       | "Participants were asked the acupuncture AEs by acupuncturists using an open-ended question first, then the AcupAE. The open ended question asked if they had any discomfort during treatment and after the last few treatments."                                                                                                                                                                                                                                                                                                                                                                                                                                     | "...mild AE required no treatment or resolved within 1 day, moderate AE lasted more than 1 day or relieved by non-prescription medication, severe AE required medical treatment."                                                                                                                                                  |
| Da Silva 2014    | "Adverse effects were defined as 'any unusual, inconvenient or ill-effect, no matter how small, that is unintended and non-therapeutic', Examples were given to patients"; "We did not included 'aggravation of symptoms' because of the difficulty in judging whether the event was associated with acupuncture, was serious or not, and also because some practitioners believe that transient worsening is part of treatment."                                                                                                                                                                                                                                     | "A 'serious event' was considered as one which needed further specific medical intervention or had interfered with the patient's normal life for at least the remainder of the day"                                                                                                                                                |
| Endres 2004      | "The ICH definition of an adverse event (AEs) is any untoward medical occurrence experienced by patients, temporally but not necessarily causally associated with the use of a drug or medical treatment..."                                                                                                                                                                                                                                                                                                                                                                                                                                                          | "... serious adverse event (SAEs) identified, according to the ICH, as an adverse event that results in a life-threatening condition or death, requires hospitalization or prolongation of existing hospitalization, or results in persistent or significant disability or incapacity, including congenital anomaly/birth defects" |
| Ernst 2003       | "A checklist was provided which mentioned haemorrhage, haematoma, infections, neurological abnormalities, fainting, vestibular symptoms, nausea, prolonged DeQi effect and increase of pain. Free space was provided to record other observed adverse effects. All therapists asked their patients with standardised open questions: during therapy, "How do you feel now?"; and before every subsequent therapy, "How did you feel after the last acupuncture therapy?". The therapists were asked to document 'possible septic syndrome' if fever and/or hypotension were observed in combination with local infection at one or more points that had been needed." | SAE not defined                                                                                                                                                                                                                                                                                                                    |
| Furose 2017      | "...any untoward medical occurrence in a patient who underwent acupuncture therapy and which does not necessarily have a causal relationship with this treatment."<br>In line with ICH but only selection list with AE likely related to acupuncture applied                                                                                                                                                                                                                                                                                                                                                                                                          | "...serious AE (pneumothorax, other organ injury, central nerve injury, peripheral nerve injury, suppurative arthritis, suppurative myositis, cellulitis, hepatitis B, hepatitis C, needle breakage and/or needle migration, accidental insertion, and other symptoms that practitioners regarded as serious)..."                  |
| Leung 2009       | "A list of possible complications and adverse effects was used to check the events thoroughly. The list consisted of bleeding, obvious tissue/ organ damage, fainting, syncope, persistent needle pain, post-puncture tiredness, palpitation, exacerbation of symptoms nausea, dyspnea, convulsion, psychological symptoms, etc."                                                                                                                                                                                                                                                                                                                                     | SAE not defined<br>"no harmful complication was encountered"                                                                                                                                                                                                                                                                       |
| List 1992        | "In this paper, adverse event refers to any reaction to a treatment besides the intended treatment effect irrespective of any correlation between the treatment and the reaction."                                                                                                                                                                                                                                                                                                                                                                                                                                                                                    | SAE not defined                                                                                                                                                                                                                                                                                                                    |
| Mac Pherson 2001 | "Practitioners were asked to record mild transient reactions to treatment, within one or more of three categories (systemic, aggravation, local)"                                                                                                                                                                                                                                                                                                                                                                                                                                                                                                                     | "... 'significant adverse event' was defined as any event that was 'unusual, novel, dangerous, significantly inconvenient, or requiring further information'..."                                                                                                                                                                   |
| Mac Pherson 2004 | "For the purposes of this survey we did not define an adverse event but, instead, provided patients with a checklist of possible events. This and the overall questionnaire, while not formally validated, were developed from two practitioner surveys."                                                                                                                                                                                                                                                                                                                                                                                                             | "In contrast, "serious adverse events" were predefined as those resulting in admission to hospital or being permanently disabling or life threatening"                                                                                                                                                                             |
| Mac Pherson 2005 | "Patients were asked to report short term reactions, by answering the question: 'Thinking about the visit at which you were given this form, did you experience during or immediately after your acupuncture any of the following?' We provided a checklist of possible short term reactions drawn from the results of two recently published practitioner surveys."                                                                                                                                                                                                                                                                                                  | SAE not defined                                                                                                                                                                                                                                                                                                                    |
| Melchart 1998    | „Der Fragebogen sollte, der Erfahrung der behandelnden Ärzte entsprechend vergleichsweise häufige Ereignisse erfassen, die aus Patientensicht im allgemeinen als unangenehm oder unerwünscht beurteilt werden"<br>English translation: The questionnaire was designed to reflect relatively frequent events that are, according to the physicians' experience, often experienced as unpleasant or adverse by the patient.                                                                                                                                                                                                                                             | SAE not defined                                                                                                                                                                                                                                                                                                                    |
| Melchart 2004    | "...physicians had to report whether an adverse effect (defined as any adverse event possibly related to acupuncture) occurred. If this was the case, the adverse effect had to be specified. Predefined categories were bleeding, needling pain, hematoma, infection orthostatic problems, forgotten needles, and any other events."                                                                                                                                                                                                                                                                                                                                 | "Serious adverse effects (defined as any adverse effects possibly related to acupuncture making treatment necessary or severely interfering with the patient's wellbeing, eg a pneumothorax or a nerve injury)..."                                                                                                                 |
| Odsberg 2001     | "Negative side effect – a non-intended effect of the acupuncture treatment that the patient experiences as negative, i.e. haematoma and fainting."                                                                                                                                                                                                                                                                                                                                                                                                                                                                                                                    | "Complication – a non-intended effect of the acupuncture treatment that may threaten the patient's life, i.e. pneumothorax."                                                                                                                                                                                                       |
| Park 2009        | "Therefore, this study has surveyed to report on short-term reactions as well as de qi, side-effects, and the satisfaction of patients following acupuncture treatment.", "After explaining the purpose of the survey to the patients, we had them fill out a survey form querying their reactions..."                                                                                                                                                                                                                                                                                                                                                                | SAE not defined                                                                                                                                                                                                                                                                                                                    |

|                   |                                                                                                                                                                                                                                                                                                                                                                                                                                                                                                                                                                                                                                                                                                                                                                                                                                                                                                                                                                                                                                 |                                                                                                                                                                                                                                                                                                                                                                                                                                                                                                                                                                                                                      |
|-------------------|---------------------------------------------------------------------------------------------------------------------------------------------------------------------------------------------------------------------------------------------------------------------------------------------------------------------------------------------------------------------------------------------------------------------------------------------------------------------------------------------------------------------------------------------------------------------------------------------------------------------------------------------------------------------------------------------------------------------------------------------------------------------------------------------------------------------------------------------------------------------------------------------------------------------------------------------------------------------------------------------------------------------------------|----------------------------------------------------------------------------------------------------------------------------------------------------------------------------------------------------------------------------------------------------------------------------------------------------------------------------------------------------------------------------------------------------------------------------------------------------------------------------------------------------------------------------------------------------------------------------------------------------------------------|
| Park 2010         | <p>“According to the World Health Organization (WHO), an AE is described as “any untoward medical occurrence that may present during treatment with a pharmaceutical product but which does not necessarily have a causal relationship with this treatment.”,</p> <p>“In the AE section, the reporter was asked to describe when the AEs appeared and disappeared, the type and details of the AE, and the treatment for the AE. Two (2) types of AE were identified: local AEs and systemic AEs....”, “Local AEs included a broken or forgotten needle, hemorrhage, needle allergy, needle-site pain, hematoma, and a stuck or bent needle. Systemic AEs included drowsiness, fainting, fever, hypotension, nausea, vomiting, diarrhea, sweating, headache, discomfort, dizziness, anxiety and panic, seizure, insensibility, mental disturbance, pain, temporary paresthesia, pneumothorax, organ or tissue injury, hepatitis B/C, otitis externa, sepsis, central nerve injury, skin infection, or symptom aggravation.”</p> | <p>“The International Conference on Harmonization guidelines define a serious AE as any untoward medical occurrence that, at any dose, results in death, is life-threatening, requires inpatient hospitalization or prolongation of existing hospitalization, results in persistent or significant disability/ incapacity, or is a congenital anomaly/birth defect.<sup>18</sup> There were no serious AEs related to acupuncture in this study.”</p>                                                                                                                                                                |
| Weidenhammer 2008 | <p>„Außerdem wurde gefragt: „Welche unerwünschten Wirkungen oder Komplikationen der Akupunktur sind aufgetreten?“ Antwortoptionen waren hier: „Blutung“, „Nadelschmerz“, „Hämatom“, „Infektionen“, „Kreislaufprobleme“, „vergessene Nadeln“ und „andere“ (mit Freitextfeld zur Beschreibung des Ereignisses).“</p> <p>English translation: Furthermore it was asked „Which adverse effects or complications occurred through acupuncture?“ Response options were: ‘bleeding’, ‘needling pain’, ‘haematoma’, ‘infections’, ‘circulatory problems’, ‘forgotten needles’ and ‘others’ (with free text for a description of the event)</p>                                                                                                                                                                                                                                                                                                                                                                                          | <p>“Als schwerwiegende unerwünschte Therapiewirkungen waren alle Ereignisse zu bewerten, die a) möglicherweise in einem kausalen Zusammenhang mit der Akupunkturbehandlung standen und b) behandlungspflichtig waren oder/und den Patienten gravierend beeinträchtigten oder gefährdeten (z. B. Pneumothorax, Nervenläsion).“</p> <p>English translation: Serious adverse treatment effects were defined as events that a) had a possibly causal relationship with the acupuncture treatment and b) required treatment and/or compromised or threatened the patient seriously (e.g. pneumothorax, nerve lesion).</p> |
| Wen 2017          | <p>“Adverse events, including pain, hematoma, perforation, bleeding, fainting, local infection, abscess, or breakage or retention of the needle after treatment, were recorded after every session.”</p>                                                                                                                                                                                                                                                                                                                                                                                                                                                                                                                                                                                                                                                                                                                                                                                                                        | SAE not defined                                                                                                                                                                                                                                                                                                                                                                                                                                                                                                                                                                                                      |
| White 2001        | <p>“We defined an adverse event as ‘any ill-effect, no matter how small, that is unintended and nontherapeutic’. This definition was used both in order to identify events that occurred through error but were not reactions to acupuncture, and in order to include minor events such as bleeding, not just serious events, even when these may have been an expected consequence of needling. We decided not to record unintended beneficial or pleasant events.”, “...number of adverse events classified under specific headings...”, “Some practitioners regard aggravation or drowsiness as a part of the response to treatment (the ‘healing crisis’), and not as unintended ‘adverse’ events. Therefore, if a patient later improved substantially, respondents were instructed to convert the relevant mark in the box to an asterisk.”</p>                                                                                                                                                                           | <p>“Significant Event Report....to record any event that was ‘unusual, novel, dangerous, significantly inconvenient or requiring further information’. Examples were provided, which included needling problems (broken or forgotten needle, moxa burns), systemic effects (faint, convulsion, drowsiness causing hazard e.g. on the road, severe nausea) and symptoms (unexpected or prolonged aggravation).”</p>                                                                                                                                                                                                   |
| Witt 2009         | <p>“At the end of each treatment cycle, all patients were asked to complete a standardised questionnaire and to document adverse events they associated with acupuncture (defined as adverse effects) in free text and, if necessary, the kind of treatment they had needed (self-treatment, medication/physician treatment, treatment in hospital). Adverse events without association to the acupuncture treatment were not documented.”</p>                                                                                                                                                                                                                                                                                                                                                                                                                                                                                                                                                                                  | <p>“Patients who reported adverse effects which needed treatment, received from the study office an additional, more detailed standardised questionnaire concerning their most important adverse effect.”</p>                                                                                                                                                                                                                                                                                                                                                                                                        |
| Yamashita 1999    | <p>“We defined AE as an unfavorable medical event that occurred during or after the treatment regardless of causal relationships [Beam 1992]”</p>                                                                                                                                                                                                                                                                                                                                                                                                                                                                                                                                                                                                                                                                                                                                                                                                                                                                               | <p>“...no serious or severe cases of negligence such as pneumothorax or spinal cord injury were reported in the TCT Clinic But 2 cases identified from reports that required hospitalization / likely to have caused disability.”</p>                                                                                                                                                                                                                                                                                                                                                                                |
| Yamashita 2000    | <p>“The acupuncturists meticulously observed the punctured region and general condition of the patients during and immediately after treatment. The patients were asked to report any pain or discomfort caused by needle insertion. In the interview after each treatment session, the acupuncturists asked the patients, “Did you feel any discomfort during today’s treatment session, or do you have now such a feeling that did not exist before the treatment session? Please tell me every slight discomfort even if you don’t think it is a problem.” A similar question was asked at the patient’s next visit, “Did you feel any discomfort that may have had something to do with the previous treatment, after you left our clinic?”</p>                                                                                                                                                                                                                                                                             | <p>“Details recorded on the report form included ... severity or magnitude of symptom, and treatment for the reaction.”,</p> <p>“All reactions were mild and transient.”</p> <p>“No medical care was required for any of these reactions.”</p>                                                                                                                                                                                                                                                                                                                                                                       |
| Zhao 2011         | <p>“AE is defined as an unfavourable medical event that occurs during or after the treatment regardless of causal relationship”,</p> <p>“AE and SAE were defined a priori from the literature and the State Food and Drug Administration (SFDA) in China.”</p>                                                                                                                                                                                                                                                                                                                                                                                                                                                                                                                                                                                                                                                                                                                                                                  | <p>“Serious adverse effects (SAEs) refers to those that caused hospitalisation, extended duration of hospitalisation, disability, impaired ability to work, death or were life threatening, resulting in events such as congenital malformations in the process of the clinical trials.”</p>                                                                                                                                                                                                                                                                                                                         |

Online supplementary appendix S4: Definition of adverse events with respective severity ratings as direct quotes from the included manuscripts

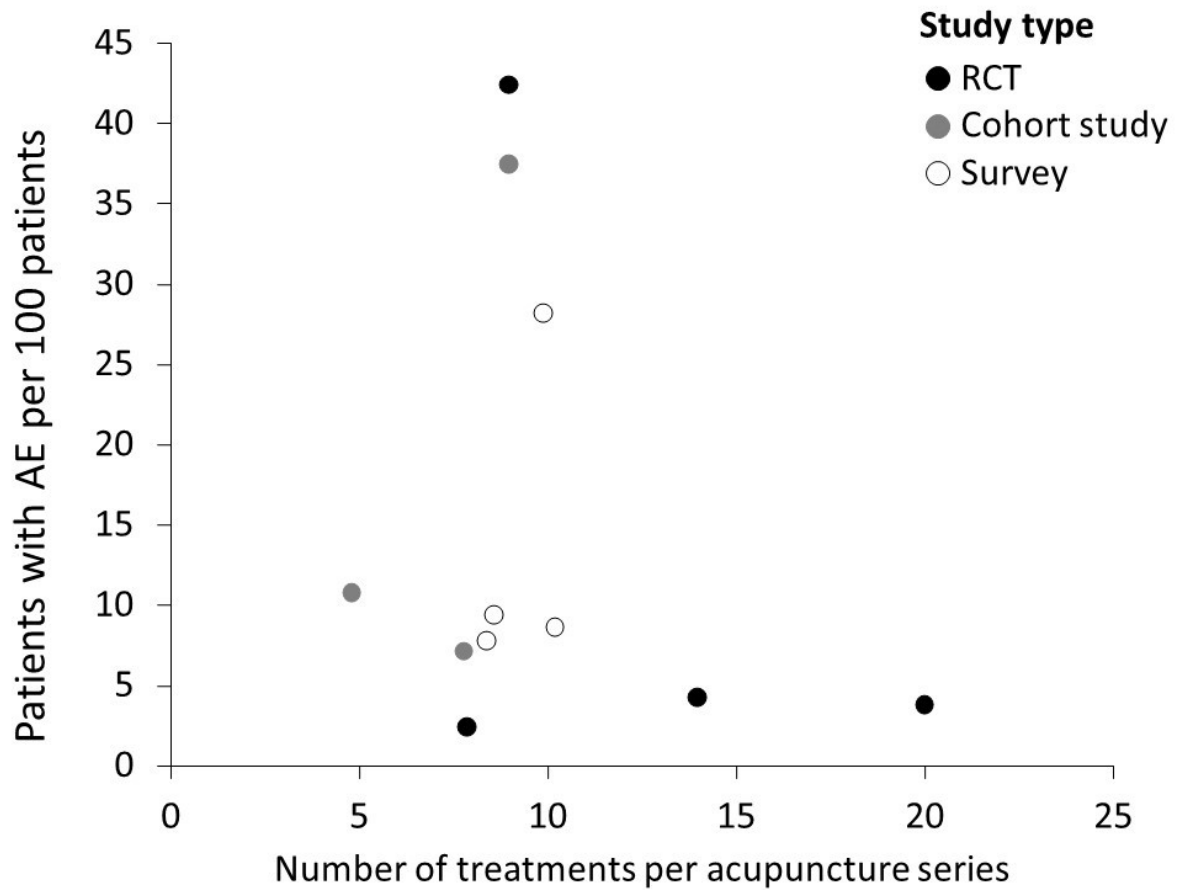

33  
34 Online supplementary appendix S5: Independence of incidences of adverse events per patient from  
35 the number of treatments per acupuncture series and study type

36  
37 Scatterplot of the number of treatments applied within an acupuncture series against the observed  
38 adverse events (AE) incidence as patients with AE per 100 patients  
39

| Study                        | Total number of patients | Risk as patients with AE per 100 patients [95%-CI] |                         |                            |                         |                         |                         |                           |                         |                                          |
|------------------------------|--------------------------|----------------------------------------------------|-------------------------|----------------------------|-------------------------|-------------------------|-------------------------|---------------------------|-------------------------|------------------------------------------|
|                              |                          | Bleeding                                           | Needle sit pain         | Other local AE             | Vegetative reaction     | Aggravation of symptoms | Central nervous system  | Peripheral nervous system | Distant pain            | Gastrointestinal / gynaecological system |
| List 1992                    | 29                       |                                                    | 44.83<br>[27.46; 62.87] |                            | 58.62<br>[40.52; 75.59] | 93.10<br>[81.26; 99.30] | 37.93<br>[21.45; 55.99] | 27.59<br>[13.14; 44.96]   | 17.24<br>[5.94; 32.83]  | 3.45<br>[0.00; 12.99]                    |
| Chung 2015                   | 59                       | 15.25<br>[7.30; 25.45]                             | 32.20<br>[20.99; 44.57] | 35.59<br>[23.97; 48.14]    | 13.56<br>[6.10; 23.38]  |                         | 5.08<br>[0.99; 12.08]   | 11.86<br>[4.94; 21.26]    | 5.08<br>[0.99; 12.08]   | 3.39<br>[0.33; 9.47]                     |
| Wen 2016                     | 120                      | 0.83<br>[0.00; 3.24]                               | 2.50<br>[0.48; 6.04]    |                            |                         |                         |                         |                           | 0.83<br>[0.00; 3.24]    |                                          |
| Melchart 1998                | 121                      | 3.31<br>[0.88; 7.21]                               | 14.05<br>[8.46; 20.78]  | 1.65<br>[0.16; 4.68]       | 8.26<br>[4.05; 13.81]   | 10.74<br>[5.88; 16.85]  | 2.48<br>[0.48; 5.99]    | 0.83<br>[0.00; 3.21]      | 0.83<br>[0.00; 3.21]    | 4.13<br>[1.33; 8.39]                     |
| Leung 2009                   | 254                      | 2.36<br>[0.86; 4.58]                               |                         |                            |                         |                         |                         |                           |                         |                                          |
| Yamashita 2000               | 391                      |                                                    | 0.26<br>[0.00; 1.00]    | 1.02<br>[0.27; 2.26]       | 11.76<br>[8.76; 15.14]  | 2.81<br>[1.41; 4.68]    | 0.77<br>[0.15; 1.87]    |                           |                         |                                          |
| Ernst 2003                   | 409                      | 25.18<br>[21.10; 29.50]                            | 8.07<br>[5.63; 10.90]   | 0.24<br>[0.00; 0.96]       | 6.36<br>[4.20; 8.92]    | 0.98<br>[0.26; 2.16]    | 6.11<br>[4.00; 8.64]    | 4.89<br>[3.01; 7.19]      | 1.96<br>[0.84; 3.52]    | 17.85<br>[14.29; 21.70]                  |
| Zhao 2011                    | 1968                     | 3.40<br>[2.65; 4.25]                               | 0.05<br>[0.00; 0.20]    |                            | 0.10<br>[0.01; 0.29]    |                         | 0.05<br>[0.00; 0.20]    |                           | 0.05<br>[0.00; 0.20]    |                                          |
| Furuse 2017                  | 2180                     | 12.80<br>[11.43; 14.23]                            | 6.24<br>[5.26; 7.29]    |                            |                         | 1.06<br>[0.67; 1.53]    |                         |                           |                         | 1.10<br>[0.71; 1.58]                     |
| Weidenhammer 2008 patients   | 5998                     | 0.48<br>[0.32; 0.67]                               | 0.32<br>[0.19; 0.47]    | 0.32<br>[0.19; 0.47]       | 2.72<br>[2.32; 3.14]    | 0.80<br>[0.59; 1.04]    | 0.90<br>[0.68; 1.16]    | 0.47<br>[0.31; 0.66]      | 0.95<br>[0.72; 1.21]    | 0.62<br>[0.43; 0.83]                     |
| MacPherson 2004              | 6348                     | 0.58<br>[0.41; 0.79]                               | 1.86<br>[1.54; 2.21]    | 0.36<br>[0.23; 0.53]       | 4.69<br>[4.19; 5.23]    | 1.20<br>[0.94; 1.48]    | 0.87<br>[0.65; 1.11]    | 0.65<br>[0.46; 0.86]      | 0.17<br>[0.09; 0.29]    | 0.96<br>[0.74; 1.22]                     |
| Melchart 2004                | 97733                    | 4.56<br>[4.43; 4.70]                               | 3.28<br>[3.17; 3.39]    | 0.18<br>[0.15; 0.20]       | 0.48<br>[0.44; 0.53]    | 0.12<br>[0.10; 0.14]    |                         |                           |                         | 0.33<br>[0.29; 0.36]                     |
| Endres 2004                  | 190924                   | 5.18<br>[5.08; 5.28]                               | 0.05<br>[0.04; 0.06]    | 24.51<br>[24.31; 24.70]    | 0.70<br>[0.67; 0.74]    | 1.31<br>[1.26; 1.36]    | 0.08<br>[0.07; 0.10]    |                           |                         | 0.07<br>[0.05; 0.08]                     |
| Witt 2009                    | 229230                   | 6.15<br>[6.05; 6.24]                               | 0.45<br>[0.43; 0.48]    | 0.60<br>[0.57; 0.63]       | 0.30<br>[0.28; 0.33]    | 0.40<br>[0.38; 0.43]    | 0.26<br>[0.24; 0.28]    | 0.26<br>[0.24; 0.28]      | 0.76<br>[0.72; 0.79]    | 0.22<br>[0.20; 0.24]                     |
| Weidenhammer 2008 therapists | 503397                   | 4.84<br>[4.78; 4.90]                               | 3.95<br>[3.90; 4.01]    | 0.15<br>[0.14; 0.16]       | 0.08<br>[0.07; 0.08]    | 0.08<br>[0.07; 0.09]    |                         |                           | 0.01<br>[0.01; 0.02]    | 0.26<br>[0.25; 0.28]                     |
| Fixed effect                 |                          | 5.09<br>[5.05; 5.13]                               | 1.81<br>[1.78; 1.84]    | 1.85<br>[1.83; 1.88]       | 0.25<br>[0.24; 0.26]    | 0.29<br>[0.28; 0.30]    | 0.28<br>[0.26; 0.31]    | 0.18<br>[0.17; 0.19]      | 0.74<br>[0.71; 0.77]    | 0.06<br>[0.05; 0.06]                     |
| Random effect                |                          | 4.67<br>[2.08; 8.22]                               | 3.75<br>[0.74; 8.94]    | 2.79<br>[0.02; 10.01]      | 1.95<br>[0.40; 4.63]    | 1.48<br>[0.00; 5.90]    | 1.45<br>[0.07; 4.51]    | 0.69<br>[0.02; 2.34]      | 0.60<br>[0.21; 1.20]    | 0.60<br>[0.04; 1.81]                     |
| tau <sup>2</sup>             |                          | 0.0008                                             | 0.0085                  | 0.0494                     | 0.0012                  | 0.0017                  | 0.0018                  | 0.0004                    | 0.0005                  | 0.0008                                   |
| I <sup>2</sup>               |                          | 99.4%<br>[99.3%; 99.5%]                            | 99.9%<br>[99.9%; 99.9%] | 100.0%<br>[100.0%; 100.0%] | 99.7%<br>[99.7%; 99.7%] | 99.8%<br>[99.8%; 99.8%] | 96.3%<br>[94.6%; 97.5%] | 98.1%<br>[97.4%; 98.7%]   | 92.6%<br>[85.7%; 96.2%] | 99.3%<br>[99.1%; 99.4%]                  |
| p-value Q-test               |                          | < 0.0001                                           | < 0.0001                | < 0.0001                   | < 0.0001                | < 0.0001                | < 0.0001                | < 0.0001                  | < 0.0001                | < 0.0001                                 |

| Study                        | Total number of patients | Risk as patients with AE per 100 patients [95%-CI] |                         |                         |                           |                         |                         |                         |                         |                        |
|------------------------------|--------------------------|----------------------------------------------------|-------------------------|-------------------------|---------------------------|-------------------------|-------------------------|-------------------------|-------------------------|------------------------|
|                              |                          | Headache                                           | Cardiovascular system   | Motor system            | Generalized skin reaction | Needling malpractice    | Emotional interference  | Sleeping problems       | Moxibustion AE          | Respiratory system     |
| List 1992                    | 29                       |                                                    |                         | 41,38<br>[24,41; 59,48] |                           |                         |                         | 20,69<br>[8,19; 37,03]  |                         |                        |
| Chung 2015                   | 59                       | 13.56<br>[6.0980; 23.38]                           |                         |                         | 1,69<br>[0,00; 6,52]      | 0,00<br>[0,00; 1,62]    |                         |                         |                         |                        |
| Wen 2016                     | 120                      |                                                    |                         |                         |                           |                         |                         |                         |                         |                        |
| Melchart 1998                | 121                      |                                                    | 0.83<br>[0,00; 3,21]    |                         |                           |                         | 0,83<br>[0,00; 3,21]    |                         |                         |                        |
| Leung 2009                   | 254                      |                                                    |                         |                         |                           |                         |                         |                         |                         |                        |
| Yamashita 2000               | 391                      | 0.51<br>[0.0485; 1.46]                             |                         |                         |                           |                         |                         |                         |                         |                        |
| Ernst 2003                   | 409                      | 0.49<br>[0.0463; 1.40]                             | 0.49<br>[0.05; 1.40]    | 0,24<br>[0,00; 0,96]    |                           |                         | 0,98<br>[0,26; 2,16]    |                         |                         | 0,24<br>[0,00; 0,96]   |
| Zhao 2011                    | 1968                     |                                                    |                         | 0,10<br>[0,01; 0,29]    |                           |                         |                         |                         |                         |                        |
| Furuse 2017                  | 2180                     | 0.05<br>[0.0000; 0.18]                             |                         |                         |                           | 0,60<br>[0,32; 0,96]    |                         |                         | 0,96<br>[0,60; 1,42]    |                        |
| Weidenhammer 2008 patients   | 5998                     | 1.37<br>[1.0889; 1.68]                             | 0.60<br>[0.42; 0.81]    | 0,35<br>[0,22; 0,52]    |                           |                         |                         | 0,13<br>[0,06; 0,24]    |                         | 0,07<br>[0,02; 0,15]   |
| MacPherson 2004              | 6348                     | 1.21<br>[0.9585; 1.50]                             |                         |                         |                           | 1,04<br>[0,81; 1,30]    | 1,24<br>[0,99; 1,53]    | 0,74<br>[0,54; 0,97]    | 0,44<br>[0,29; 0,62]    |                        |
| Melchart 2004                | 97733                    | 0.04<br>[0.0275; 0.05]                             |                         |                         |                           | 0,25<br>[0,22; 0,28]    |                         |                         |                         |                        |
| Endres 2004                  | 190924                   |                                                    |                         |                         |                           | 0,00<br>[0,00; 0,00]    | 0,04<br>[0,03; 0,05]    | 0,04<br>[0,03; 0,05]    | 0,00<br>[0,00; 0,00]    |                        |
| Witt 2009                    | 229230                   | 0.52<br>[0.4944; 0.55]                             | 0.27<br>[0.25; 0.29]    | 0,08<br>[0,07; 0,09]    | 0,09<br>[0,08; 0,10]      | 0,01<br>[0,00; 0,01]    | 0,09<br>[0,08; 0,11]    | 0,04<br>[0,03; 0,05]    | 0,01<br>[0,00; 0,01]    | 0,02<br>[0,01; 0,02]   |
| Weidenhammer 2008 therapists | 503397                   | 0.03<br>[0.0287; 0.04]                             | 0.42<br>[0.40; 0.43]    |                         |                           | 0,28<br>[0,27; 0,30]    | 0,0197<br>[0,02; 0,02]  |                         |                         |                        |
| <b>Fixed effect</b>          |                          | 0.12<br>[0.11; 0.13]                               |                         | 0,09<br>[0,08; 0,10]    | 0,09<br>[0,08; 0,10]      | 0,11<br>[0,11; 0,12]    | 0,04<br>[0,04; 0,04]    | 0,05<br>[0,04; 0,05]    | 0,00<br>[0,00; 0,01]    | 0,02<br>[0,01; 0,02]   |
| <b>Random effect</b>         |                          | 0.51<br>[0.03; 1.55]                               | 0.40<br>[0.24; 0.61]    | 0,38<br>[0,00; 4,79]    | 0,35<br>[0,00; 35,67]     | 0,22<br>[0,01; 0,67]    | 0,20<br>[0,00; 0,81]    | 0,16<br>[0,00; 0,91]    | 0,14<br>[0,00; 1,16]    | 0,04<br>[0,00; 0,26]   |
| <b>tau<sup>2</sup></b>       |                          | 0.0012                                             | 0.0001                  | 0.0011                  | 0.0029                    | 0.0009                  | 0.0002                  | 0.0001                  | 0.0002                  | 0.0001                 |
| <b>I<sup>2</sup></b>         |                          | 99.6%<br>[99.6%; 99.7%]                            | 96.4%<br>[93.9%; 97.9%] | 94.6%<br>[90.2%; 97.1%] | = 58.2%<br>[0.0%; 90.1%]  | 99.7%<br>[99.7%; 99.8%] | 98.7%<br>[98.2%; 99.1%] | 97.1%<br>[95.3%; 98.2%] | 98.3%<br>[97.3%; 99.0%] | 69.0%<br>[0.0%; 91.0%] |
| <b>p-value Q-test</b>        |                          | < 0.0001                                           | < 0.0001                | < 0.0001                | 0.1221                    | < 0.0001                | < 0.0001                | < 0.0001                | < 0.0001                | 0.0398                 |

### Online supplementary appendix S6: Risks for different types of adverse events per 100 patients undergoing an acupuncture series as reported in single studies

Summary risk estimates of adverse events (AE) derived from random effects meta-analyses displayed in table 4



| Study            | Total number of treatments | Risk as treatments with AE per 100 treatments [95%-CI] |                         |                         |                           |                         |                         |                           |                         |                                     |                         |
|------------------|----------------------------|--------------------------------------------------------|-------------------------|-------------------------|---------------------------|-------------------------|-------------------------|---------------------------|-------------------------|-------------------------------------|-------------------------|
|                  |                            | Bleeding                                               | Pain                    | Other local AE          | Vegetative nervous system | Aggravation of symptoms | Central nervous system  | Peripheral nervous system | Distant pain            | Gastrointestinal /gynaecological AE | Unclassified AE         |
| Yamashita 2000   | 1441                       | 45.45<br>[42.89; 48.03]                                | 15.75<br>[13.92; 17.68] | 0.90<br>[0.48; 1.46]    | 4.72<br>[3.69; 5.87]      | 1.11<br>[0.63; 1.72]    | 0.35<br>[0.11; 0.72]    |                           | 0.07<br>[0.00; 0.27]    |                                     |                         |
| daSilva 2014     | 13884                      | 4.11<br>[3.79; 4.45]                                   | 3.02<br>[2.74; 3.31]    | 0.43<br>[0.33; 0.55]    | 0.02<br>[0.00; 0.05]      |                         | 0.01<br>[0.00; 0.03]    | 0.11<br>[0.06; 0.17]      |                         | 0.04<br>[0.01; 0.07]                |                         |
| Melchart 1998    | 1200                       | 0.33<br>[0.09; 0.74]                                   | 4.17<br>[3.11; 5.37]    | 0.17<br>[0.02; 0.48]    | 2.58<br>[1.76; 3.56]      | 1.75<br>[1.09; 2.57]    | 0.25<br>[0.05; 0.61]    | 0.08<br>[0.00; 0.33]      | 0.08<br>[0.00; 0.33]    | 0.42<br>[0.13; 0.86]                |                         |
| MacPherson 2005  | 9408                       | 4.72<br>[4.30; 5.16]                                   | 12.27<br>[11.61; 12.94] | 0.26<br>[0.16; 0.37]    | 27.87<br>[26.97; 28.78]   | 1.75<br>[1.50; 2.03]    |                         | 0.35<br>[0.24; 0.48]      | 4.49<br>[4.08; 4.91]    | 1.18<br>[0.97; 1.41]                | 0.35<br>[0.24; 0.48]    |
| Furuse 2017      | 14039                      | 3.16<br>[2.88; 3.46]                                   | 1.25<br>[1.07; 1.44]    | 0.09<br>[0.04; 0.14]    | 0.63<br>[0.51; 0.77]      | 0.20<br>[0.13; 0.28]    | 0.09<br>[0.05; 0.15]    | 0.07<br>[0.03; 0.12]      |                         | 0.10<br>[0.05; 0.16]                | 0.20<br>[0.13; 0.28]    |
| Ernst 2003       | 3535                       | 5.18<br>[4.47; 5.93]                                   | 1.30<br>[0.95; 1.70]    | 0.08<br>[0.02; 0.21]    | 2.46<br>[1.98; 3.00]      | 0.25<br>[0.12; 0.45]    | 1.08<br>[0.76; 1.44]    | 1.44<br>[1.08; 1.86]      |                         | 0.34<br>[0.17; 0.56]                | 5.46<br>[4.74; 6.23]    |
| Odsberg 2001     | 9277                       | 18.44<br>[17.66; 19.24]                                | 0.08<br>[0.03; 0.14]    | 0.05<br>[0.02; 0.11]    | 1.42<br>[1.19; 1.67]      | 2.33<br>[2.03; 2.65]    | 0.18<br>[0.11; 0.28]    | 0.01<br>[0.00; 0.04]      |                         | 0.02<br>[0.00; 0.06]                | 0.06<br>[0.02; 0.13]    |
| Yamashita 1999   | 65482                      | 0.03<br>[0.02; 0.05]                                   | 0.01<br>[0.00; 0.02]    | 0.00<br>[0.00; 0.01]    | 0.00<br>[0.00; 0.01]      | 0.00<br>[0.00; 0.01]    | 0.01<br>[0.00; 0.02]    | 0.00<br>[0.00; 0.01]      |                         | 0.01<br>[0.00; 0.02]                | 0.00<br>[0.00; 0.01]    |
| Park 2009        | 1095                       | 8.40<br>[6.83; 10.12]                                  | 3.38<br>[2.39; 4.53]    |                         | 3.11<br>[2.16; 4.21]      |                         | 0.82<br>[0.37; 1.44]    | 1.46<br>[0.84; 2.26]      |                         |                                     | 0.46<br>[0.14; 0.94]    |
| Leung 2009       | 2000                       | 0.40<br>[0.17; 0.72]                                   |                         |                         |                           |                         |                         |                           |                         |                                     |                         |
| Park 2010        | 3071                       | 1.95<br>[1.49; 2.47]                                   | 0.49<br>[0.27; 0.77]    | 0.10<br>[0.02; 0.24]    | 0.75<br>[0.66; 0.85]      | 0.07<br>[0.01; 0.19]    | 0.03<br>[0.00; 0.13]    | 0.26<br>[0.11; 0.47]      |                         | 0.03<br>[0.00; 0.13]                | 0.03<br>[0.00; 0.13]    |
| White 2001       | 31822                      | 3.09<br>[2.90; 3.28]                                   | 1.15<br>[1.04; 1.27]    | 0.10<br>[0.07; 0.13]    | 4.73<br>[4.50; 4.95]      | 0.98<br>[0.87; 1.09]    | 0.01<br>[0.00; 0.03]    | 0.00<br>[0.00; 0.01]      |                         | 0.02<br>[0.01; 0.04]                | 0.46<br>[0.39; 0.54]    |
| MacPherson 2001  | 34407                      | 2.08<br>[1.93; 2.23]                                   | 1.24<br>[1.12; 1.35]    | 0.01<br>[0.00; 0.02]    | 4.73<br>[4.50; 4.95]      | 2.83<br>[2.66; 3.01]    | 0.63<br>[0.55; 0.71]    |                           | 0.51<br>[0.44; 0.59]    | 0.31<br>[0.25; 0.37]                | 0.86<br>[0.76; 0.96]    |
| Fixed effect     |                            | 1.87<br>[1.80; 1.93]                                   | 0.82<br>[0.78; 0.87]    | 0.05<br>[0.04; 0.06]    | 1.08<br>[1.04; 1.13]      | 0.58<br>[0.55; 0.62]    | 0.09<br>[0.07; 0.10]    | 0.03<br>[0.02; 0.04]      | 0.96<br>[0.87; 1.05]    | 0.08<br>[0.07; 0.09]                | 0.23<br>[0.20; 0.25]    |
| Random effect    |                            | 4.92<br>[1.18; 11.01]                                  | 2.43<br>[0.63; 5.35]    | 0.13<br>[0.04; 0.27]    | 2.24<br>[0.21; 6.35]      | 0.84<br>[0.26; 1.75]    | 0.20<br>[0.05; 0.46]    | 0.19<br>[0.02; 0.55]      | 0.73<br>[0.00; 5.02]    | 0.15<br>[0.03; 0.38]                | 0.47<br>[0.03; 1.46]    |
| tau <sup>2</sup> |                            | 0.0169                                                 | 0.0095                  | 0.0004                  | 0.0213                    | 0.0055                  | 0.0011                  | 0.0008                    | 0.0085                  | 0.0008                              | 0.0025                  |
| I <sup>2</sup>   |                            | 99.9%<br>[99.9%; 99.9%]                                | 99.8%<br>[99.8%; 99.8%] | 96.4%<br>[94.9%; 97.4%] | 99.9%<br>[99.9%; 99.9%]   | 99.7%<br>[99.6%; 99.7%] | 98.4%<br>[97.9%; 98.8%] | 97.5%<br>[96.6%; 98.2%]   | 99.5%<br>[99.4%; 99.7%] | 98.2%<br>[97.6%; 98.6%]             | 99.4%<br>[99.2%; 99.5%] |
| p-value Q-test   |                            | < 0.0001                                               | < 0.0001                | 0.0001                  | < 0.0001                  | < 0.0001                | 0.0001                  | < 0.0001                  | 0.0001                  | 0.0001                              | 0.0001                  |



| Study                  | Total number of treatments | Risk as treatments with AE per 100 treatments [95%-CI] |                        |                        |                           |                         |                         |                   |                         |                      |
|------------------------|----------------------------|--------------------------------------------------------|------------------------|------------------------|---------------------------|-------------------------|-------------------------|-------------------|-------------------------|----------------------|
|                        |                            | Headache                                               | Cardiovascular system  | Motor system           | Generalized skin reaction | Needling malpractice    | Emotional interference  | Sleeping problems | Moxibustion AE          | Respiratory system   |
| Yamashita2000          | 1441                       | 0.14<br>[0.01; 0.40]                                   |                        |                        |                           | 0.62<br>[0.28; 1.10]    |                         |                   |                         |                      |
| daSilva2014            | 13884                      |                                                        |                        |                        |                           | 0.24<br>[0.16; 0.33]    |                         |                   |                         |                      |
| Melchart1998           | 1200                       |                                                        | 0.08<br>[0.00; 0.33]   |                        |                           |                         | 0.08<br>[0.00; 0.33]    |                   |                         |                      |
| MacPherson2005         | 9408                       |                                                        |                        |                        |                           |                         | 0.67<br>[0.51; 0.84]    |                   |                         |                      |
| Furuse2017             | 14039                      | 0.01<br>[0.00; 0.03]                                   | 0.01<br>[0.00; 0.04]   |                        |                           | 0.10<br>[0.05; 0.16]    |                         |                   | 0.17<br>[0.11; 0.25]    |                      |
| Ernst2003              | 3535                       | 0.06<br>[0.01; 0.16]                                   | 0.06<br>[0.01; 0.16]   | 0.03<br>[0.00; 0.11]   |                           |                         | 0.11<br>[0.03; 0.25]    |                   |                         | 0.03<br>[0.00; 0.11] |
| Odsberg2001            | 9277                       | 0.05<br>[0.02; 0.11]                                   |                        | 0.01<br>[0.00; 0.04]   |                           |                         | 0.04<br>[0.01; 0.10]    |                   |                         |                      |
| Yamashita1999          | 65482                      |                                                        |                        |                        |                           | 0.04<br>[0.03; 0.06]    | 0.01<br>[0.00; 0.02]    |                   | 0.01<br>[0.00; 0.02]    |                      |
| Park2009               | 1095                       |                                                        |                        |                        |                           |                         |                         |                   |                         |                      |
| Leung2009              | 2000                       |                                                        |                        |                        |                           |                         |                         |                   |                         |                      |
| Park2010               | 3071                       | 0.03<br>[0.00; 0.13]                                   |                        | 0.10<br>[0.02; 0.24]   |                           | 0.10<br>[0.02; 0.24]    |                         |                   |                         |                      |
| White2001              | 31822                      | 0.11<br>[0.08; 0.15]                                   |                        | 0.00<br>[0.00; 0.01]   |                           | 0.15<br>[0.11; 0.19]    | 0.01<br>[0.00; 0.02]    |                   | 0.00<br>[0.00; 0.01]    |                      |
| MacPherson2001         | 34407                      | 0.00<br>[0.00; 0.01]                                   |                        | 0.00<br>[0.00; 0.01]   |                           | 0.01<br>[0.00; 0.02]    | 0.01<br>[0.00; 0.03]    |                   | 0.00<br>[0.00; 0.01]    |                      |
| <b>Fixed effect</b>    |                            | 0.03<br>[0.02; 0.05]                                   | 0.02<br>[0.01; 0.05]   | 0.01<br>[0.00; 0.01]   |                           | 0.06<br>[0.05; 0.08]    | 0.03<br>[0.02; 0.03]    |                   | 0.01<br>[0.01; 0.02]    |                      |
| <b>Random effect</b>   |                            | 0.04<br>[0.01; 0.10]                                   | 0.03<br>[0.00; 0.13]   | 0.01<br>[0.00; 0.04]   |                           | 0.12<br>[0.02; 0.28]    | 0.08<br>[0.00; 0.27]    |                   | 0.02<br>[0.00; 0.18]    | 0.03<br>[0.00; 0.11] |
| <b>tau<sup>2</sup></b> |                            | 0.0002                                                 | 0.0001                 | 0.0001                 |                           | 0.0002                  | 0.0004                  |                   | 0.0001                  |                      |
| <b>I<sup>2</sup></b>   |                            | 90.3%<br>[82.5%; 94.6%]                                | 21.2%<br>[0.0%; 91.8%] | 58.1%<br>[0.0%; 84.4%] |                           | 95.1%<br>[92.0%; 96.9%] | 96.8%<br>[95.1%; 97.9%] |                   | 95.0%<br>[90.3%; 97.5%] |                      |
| <b>p-value Q-test</b>  |                            | 0.0001                                                 | 0.2811                 | 0.0489                 |                           | 0.0001                  | 0.0001                  |                   | 0.0001                  |                      |

#### Online supplementary appendix S7: Risks for different types of adverse events per 100 treatments as reported in single studies

Summary risk estimates of adverse events (AE) derived from random effects meta-analyses displayed in table 4
