# Supplementary material for: Acupuncture-related adverse events: systematic review and meta-analyses of prospective clinical studies
Source: PubMed Central journal article supplement — BMJ Open. 2021 Sep 6;11(9):e045961. doi: 10.1136/bmjopen-2020-045961 (PMC8422480; doi:10.1136/bmjopen-2020-045961), 2021-09-06
Supplement: bmjopen-2020-045961supp005.pdf [file bmjopen-2020-045961supp005.pdf]

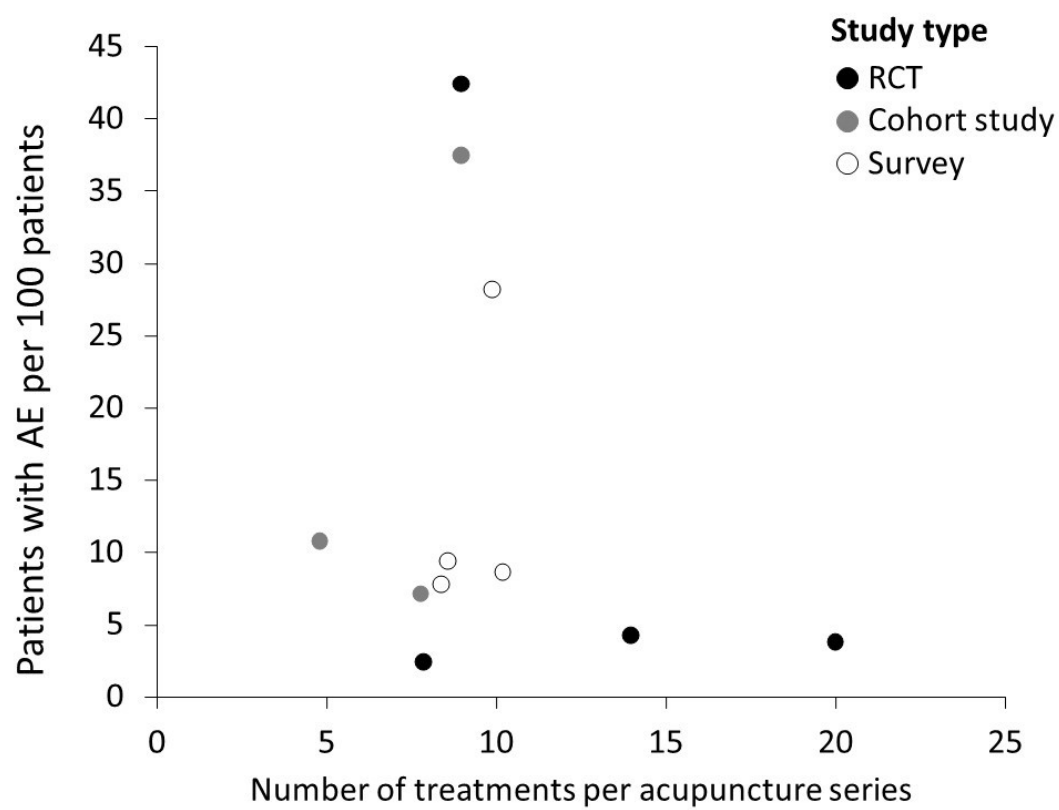

Online supplementary appendix S5: Independence of incidences of adverse events per patient from the number of treatments per acupuncture series and study type

Scatterplot of the number of treatments applied within an acupuncture series against the observed adverse events (AE) incidence as patients with AE per 100 patients
