# Supplementary material for: Acupuncture-related adverse events: systematic review and meta-analyses of prospective clinical studies
Source: PubMed Central journal article supplement — BMJ Open. 2021 Sep 6;11(9):e045961. doi: 10.1136/bmjopen-2020-045961 (PMC8422480; doi:10.1136/bmjopen-2020-045961), 2021-09-06
Supplement: bmjopen-2020-045961supp006.pdf [file bmjopen-2020-045961supp006.pdf]

| Study                        | Total number of patients | Risk as patients with AE per 100 patients [95%-CI] |                         |                            |                         |                         |                         |                           |                         |                                          |                         |
|------------------------------|--------------------------|----------------------------------------------------|-------------------------|----------------------------|-------------------------|-------------------------|-------------------------|---------------------------|-------------------------|------------------------------------------|-------------------------|
|                              |                          | Bleeding                                           | Needle sit pain         | Other local AE             | Vegetative reaction     | Aggravation of symptoms | Central nervous system  | Peripheral nervous system | Distant pain            | Gastrointestinal / gynaecological system | Unclassified AE         |
| List 1992                    | 29                       |                                                    | 44.83<br>[27.46; 62.87] |                            | 58.62<br>[40.52; 75.59] | 93.10<br>[81.26; 99.30] | 37.93<br>[21.45; 55.99] | 27.59<br>[13.14; 44.96]   |                         | 17.24<br>[5.94; 32.83]                   | 3.45<br>[0.00; 12.99]   |
| Chung 2015                   | 59                       | 15.25<br>[7.30; 25.45]                             | 32.20<br>[20.99; 44.57] | 35.59<br>[23.97; 48.14]    | 13.56<br>[6.10; 23.38]  |                         | 5.08<br>[0.99; 12.08]   | 11.86<br>[4.94; 21.26]    |                         | 5.08<br>[0.99; 12.08]                    | 3.39<br>[0.33; 9.47]    |
| Wen 2016                     | 120                      | 0.83<br>[0.00; 3.24]                               | 2.50<br>[0.48; 6.04]    |                            |                         |                         |                         |                           | 0.83<br>[0.00; 3.24]    |                                          |                         |
| Melchart 1998                | 121                      | 3.31<br>[0.88; 7.21]                               | 14.05<br>[8.46; 20.78]  | 1.65<br>[0.16; 4.68]       | 8.26<br>[4.05; 13.81]   | 10.74<br>[5.88; 16.85]  | 2.48<br>[0.48; 5.99]    | 0.83<br>[0.00; 3.21]      | 0.83<br>[0.00; 3.21]    | 4.13<br>[1.33; 8.39]                     |                         |
| Leung 2009                   | 254                      | 2.36<br>[0.86; 4.58]                               |                         |                            |                         |                         |                         |                           |                         |                                          |                         |
| Yamashita 2000               | 391                      |                                                    | 0.26<br>[0.00; 1.00]    | 1.02<br>[0.27; 2.26]       | 11.76<br>[8.76; 15.14]  | 2.81<br>[1.41; 4.68]    | 0.77<br>[0.15; 1.87]    |                           |                         |                                          |                         |
| Ernst 2003                   | 409                      | 25.18<br>[21.10; 29.50]                            | 8.07<br>[5.63; 10.90]   | 0.24<br>[0.00; 0.96]       | 6.36<br>[4.20; 8.92]    | 0.98<br>[0.26; 2.16]    | 6.11<br>[4.00; 8.64]    | 4.89<br>[3.01; 7.19]      |                         | 1.96<br>[0.84; 3.52]                     | 17.85<br>[14.29; 21.70] |
| Zhao 2011                    | 1968                     | 3.40<br>[2.65; 4.25]                               | 0.05<br>[0.00; 0.20]    |                            | 0.10<br>[0.01; 0.29]    |                         | 0.05<br>[0.00; 0.20]    |                           |                         | 0.05<br>[0.00; 0.20]                     |                         |
| Furuse 2017                  | 2180                     | 12.80<br>[11.43; 14.23]                            | 6.24<br>[5.26; 7.29]    |                            |                         | 1.06<br>[0.67; 1.53]    |                         |                           |                         |                                          | 1.10<br>[0.71; 1.58]    |
| Weidenhammer 2008 patients   | 5998                     | 0.48<br>[0.32; 0.67]                               | 0.32<br>[0.19; 0.47]    | 0.32<br>[0.19; 0.47]       | 2.72<br>[2.32; 3.14]    | 0.80<br>[0.59; 1.04]    | 0.90<br>[0.68; 1.16]    | 0.47<br>[0.31; 0.66]      | 0.95<br>[0.72; 1.21]    | 0.62<br>[0.43; 0.83]                     | 0.47<br>[0.31; 0.66]    |
| MacPherson 2004              | 6348                     | 0.58<br>[0.41; 0.79]                               | 1.86<br>[1.54; 2.21]    | 0.36<br>[0.23; 0.53]       | 4.69<br>[4.19; 5.23]    | 1.20<br>[0.94; 1.48]    | 0.87<br>[0.65; 1.11]    | 0.65<br>[0.46; 0.86]      | 0.17<br>[0.09; 0.29]    | 0.96<br>[0.74; 1.22]                     | 0.38<br>[0.24; 0.54]    |
| Melchart 2004                | 97733                    | 4.56<br>[4.43; 4.70]                               | 3.28<br>[3.17; 3.39]    | 0.18<br>[0.15; 0.20]       | 0.48<br>[0.44; 0.53]    | 0.12<br>[0.10; 0.14]    |                         |                           |                         |                                          | 0.33<br>[0.29; 0.36]    |
| Endres 2004                  | 190924                   | 5.18<br>[5.08; 5.28]                               | 0.05<br>[0.04; 0.06]    | 24.51<br>[24.31; 24.70]    | 0.70<br>[0.67; 0.74]    | 1.31<br>[1.26; 1.36]    | 0.08<br>[0.07; 0.10]    |                           |                         |                                          | 0.07<br>[0.05; 0.08]    |
| Witt 2009                    | 229230                   | 6.15<br>[6.05; 6.24]                               | 0.45<br>[0.43; 0.48]    | 0.60<br>[0.57; 0.63]       | 0.30<br>[0.28; 0.33]    | 0.40<br>[0.38; 0.43]    | 0.26<br>[0.24; 0.28]    | 0.26<br>[0.24; 0.28]      | 0.76<br>[0.72; 0.79]    | 0.22<br>[0.20; 0.24]                     | 0.11<br>[0.10; 0.12]    |
| Weidenhammer 2008 therapists | 503397                   | 4.84<br>[4.78; 4.90]                               | 3.95<br>[3.90; 4.01]    | 0.15<br>[0.14; 0.16]       | 0.08<br>[0.07; 0.08]    | 0.08<br>[0.07; 0.09]    |                         |                           |                         | 0.01<br>[0.01; 0.02]                     | 0.26<br>[0.25; 0.28]    |
| Fixed effect                 |                          | 5.09<br>[5.05; 5.13]                               | 1.81<br>[1.78; 1.84]    | 1.85<br>[1.83; 1.88]       | 0.25<br>[0.24; 0.26]    | 0.29<br>[0.28; 0.30]    | 0.28<br>[0.26; 0.31]    | 0.18<br>[0.17; 0.19]      | 0.74<br>[0.71; 0.77]    | 0.06<br>[0.05; 0.06]                     | 0.19<br>[0.18; 0.20]    |
| Random effect                |                          | 4.67<br>[2.08; 8.22]                               | 3.75<br>[0.74; 8.94]    | 2.79<br>[0.02; 10.01]      | 1.95<br>[0.40; 4.63]    | 1.48<br>[0.00; 5.90]    | 1.45<br>[0.07; 4.51]    | 0.69<br>[0.02; 2.34]      | 0.60<br>[0.21; 1.20]    | 0.60<br>[0.04; 1.81]                     | 0.57<br>[0.01; 1.95]    |
| tau <sup>2</sup>             |                          | 0.0008                                             | 0.0085                  | 0.0494                     | 0.0012                  | 0.0017                  | 0.0018                  | 0.0004                    | 0.0005                  | 0.0008                                   | 0.0003                  |
| I <sup>2</sup>               |                          | 99.4%<br>[99.3%; 99.5%]                            | 99.9%<br>[99.9%; 99.9%] | 100.0%<br>[100.0%; 100.0%] | 99.7%<br>[99.7%; 99.7%] | 99.8%<br>[99.8%; 99.8%] | 96.3%<br>[94.6%; 97.5%] | 98.1%<br>[97.4%; 98.7%]   | 92.6%<br>[85.7%; 96.2%] | 99.3%<br>[99.1%; 99.4%]                  | 99.0%<br>[98.7%; 99.2%] |
| p-value Q-test               |                          | < 0.0001                                           | < 0.0001                | < 0.0001                   | < 0.0001                | < 0.0001                | < 0.0001                | < 0.0001                  | < 0.0001                | < 0.0001                                 | < 0.0001                |

| Study                        | Total number of patients | Risk as patients with AE per 100 patients [95%-CI] |                         |                         |                           |                         |                          |                         |                         |                        |
|------------------------------|--------------------------|----------------------------------------------------|-------------------------|-------------------------|---------------------------|-------------------------|--------------------------|-------------------------|-------------------------|------------------------|
|                              |                          | Headache                                           | Cardiovascular system   | Motor system            | Generalized skin reaction | Needling malpractice    | Emotional interference   | Sleeping problems       | Moxibustion AE          | Respiratory system     |
| List 1992                    | 29                       |                                                    |                         | 41,38<br>[24,41; 59,48] |                           |                         |                          | 20,69<br>[8,19; 37,03]  |                         |                        |
| Chung 2015                   | 59                       | 13.56<br>[6.0980; 23.38]                           |                         |                         | 1,69<br>[0,00; 6,52]      | 0,00<br>[0,00; 1,62]    |                          |                         |                         |                        |
| Wen 2016                     | 120                      |                                                    |                         |                         |                           |                         |                          |                         |                         |                        |
| Melchart 1998                | 121                      |                                                    | 0.83<br>[0,00; 3,21]    |                         |                           |                         | 0,83<br>[0,00; 3,21]     |                         |                         |                        |
| Leung 2009                   | 254                      |                                                    |                         |                         |                           |                         |                          |                         |                         |                        |
| Yamashita 2000               | 391                      | 0.51<br>[0,0485; 1,46]                             |                         |                         |                           |                         |                          |                         |                         |                        |
| Ernst 2003                   | 409                      | 0.49<br>[0,0463; 1,40]                             | 0.49<br>[0,05; 1,40]    | 0,24<br>[0,00; 0,96]    |                           |                         | 0,98<br>[0,26; 2,16]     |                         |                         | 0,24<br>[0,00; 0,96]   |
| Zhao 2011                    | 1968                     |                                                    |                         | 0,10<br>[0,01; 0,29]    |                           |                         |                          |                         |                         |                        |
| Furuse 2017                  | 2180                     | 0.05<br>[0,0000; 0,18]                             |                         |                         |                           | 0,60<br>[0,32; 0,96]    |                          | 0,96<br>[0,60; 1,42]    |                         |                        |
| Weidenhammer 2008 patients   | 5998                     | 1.37<br>[1,0889; 1,68]                             | 0.60<br>[0,42; 0,81]    | 0,35<br>[0,22; 0,52]    |                           |                         |                          | 0,13<br>[0,06; 0,24]    |                         | 0,07<br>[0,02; 0,15]   |
| MacPherson 2004              | 6348                     | 1.21<br>[0,9585; 1,50]                             |                         |                         |                           | 1,04<br>[0,81; 1,30]    | 1,24<br>[0,99; 1,53]     | 0,74<br>[0,54; 0,97]    | 0,44<br>[0,29; 0,62]    |                        |
| Melchart 2004                | 97733                    | 0.04<br>[0,0275; 0,05]                             |                         |                         |                           | 0,25<br>[0,22; 0,28]    |                          |                         |                         |                        |
| Endres 2004                  | 190924                   |                                                    |                         |                         |                           | 0,00<br>[0,00; 0,00]    | 0,04<br>[0,03; 0,05]     | 0,04<br>[0,03; 0,05]    | 0,00<br>[0,00; 0,00]    |                        |
| Witt 2009                    | 229230                   | 0.52<br>[0,4944; 0,55]                             | 0.27<br>[0,25; 0,29]    | 0,08<br>[0,07; 0,09]    | 0,09<br>[0,08; 0,10]      | 0,01<br>[0,00; 0,01]    | 0,09<br>[0,08; 0,11]     | 0,04<br>[0,03; 0,05]    | 0,01<br>[0,00; 0,01]    | 0,02<br>[0,01; 0,02]   |
| Weidenhammer 2008 therapists | 503397                   | 0.03<br>[0,0287; 0,04]                             | 0.42<br>[0,40; 0,43]    |                         |                           | 0,28<br>[0,27; 0,30]    | , 0,0197<br>[0,02; 0,02] |                         |                         |                        |
| Fixed effect                 |                          | 0.12<br>[0,11; 0,13]                               |                         | 0,09<br>[0,08; 0,10]    | 0,09<br>[0,08; 0,10]      | 0,11<br>[0,11; 0,12]    | 0,04<br>[0,04; 0,04]     | 0,05<br>[0,04; 0,05]    | 0,00<br>[0,00; 0,01]    | 0,02<br>[0,01; 0,02]   |
| Random effect                |                          | 0.51<br>[0,03; 1,55]                               | 0.40<br>[0,24; 0,61]    | 0,38<br>[0,00; 4,79]    | 0,35<br>[0,00; 35,67]     | 0,22<br>[0,01; 0,67]    | 0,20<br>[0,00; 0,81]     | 0,16<br>[0,00; 0,91]    | 0,14<br>[0,00; 1,16]    | 0,04<br>[0,00; 0,26]   |
| tau <sup>2</sup>             |                          | 0.0012                                             | 0.0001                  | 0.0011                  | 0.0029                    | 0.0009                  | 0.0002                   | 0.0001                  | 0.0002                  | 0.0001                 |
| I <sup>2</sup>               |                          | 99.6%<br>[99.6%; 99.7%]                            | 96.4%<br>[93.9%; 97.9%] | 94.6%<br>[90.2%; 97.1%] | = 58.2%<br>[0.0%; 90.1%]  | 99.7%<br>[99.7%; 99.8%] | 98.7%<br>[98.2%; 99.1%]  | 97.1%<br>[95.3%; 98.2%] | 98.3%<br>[97.3%; 99.0%] | 69.0%<br>[0.0%; 91.0%] |
| p-value Q-test               |                          | < 0.0001                                           | < 0.0001                | < 0.0001                | 0.1221                    | < 0.0001                | < 0.0001                 | < 0.0001                | < 0.0001                | 0.0398                 |

### Online supplementary appendix S6: Risks for different types of adverse events per 100 patients undergoing an acupuncture series as reported in single studies

Summary risk estimates of adverse events (AE) derived from random effects meta-analyses displayed in table 4
