# Supplementary material for: Acupuncture-related adverse events: systematic review and meta-analyses of prospective clinical studies
Source: PubMed Central journal article supplement — BMJ Open. 2021 Sep 6;11(9):e045961. doi: 10.1136/bmjopen-2020-045961 (PMC8422480; doi:10.1136/bmjopen-2020-045961), 2021-09-06
Supplement: bmjopen-2020-045961supp007.pdf [file bmjopen-2020-045961supp007.pdf]

| Study                  | Total number of treatments | Risk as treatments with AE per 100 treatments [95%-CI] |                         |                         |                           |                         |                         |                           |                         |                                     |                         |
|------------------------|----------------------------|--------------------------------------------------------|-------------------------|-------------------------|---------------------------|-------------------------|-------------------------|---------------------------|-------------------------|-------------------------------------|-------------------------|
|                        |                            | Bleeding                                               | Pain                    | Other local AE          | Vegetative nervous system | Aggravation of symptoms | Central nervous system  | Peripheral nervous system | Distant pain            | Gastrointestinal /gynaecological AE | Unclassified AE         |
| <b>Yamashita 2000</b>  | 1441                       | 45.45<br>[42.89; 48.03]                                | 15.75<br>[13.92; 17.68] | 0.90<br>[0.48; 1.46]    | 4.72<br>[3.69; 5.87]      | 1.11<br>[0.63; 1.72]    | 0.35<br>[0.11; 0.72]    |                           | 0.07<br>[0.00; 0.27]    |                                     |                         |
| <b>daSilva 2014</b>    | 13884                      | 4.11<br>[3.79; 4.45]                                   | 3.02<br>[2.74; 3.31]    | 0.43<br>[0.33; 0.55]    | 0.02<br>[0.00; 0.05]      |                         | 0.01<br>[0.00; 0.03]    | 0.11<br>[0.06; 0.17]      |                         | 0.04<br>[0.01; 0.07]                |                         |
| <b>Melchart 1998</b>   | 1200                       | 0.33<br>[0.09; 0.74]                                   | 4.17<br>[3.11; 5.37]    | 0.17<br>[0.02; 0.48]    | 2.58<br>[1.76; 3.56]      | 1.75<br>[1.09; 2.57]    | 0.25<br>[0.05; 0.61]    | 0.08<br>[0.00; 0.33]      | 0.08<br>[0.00; 0.33]    | 0.42<br>[0.13; 0.86]                |                         |
| <b>MacPherson 2005</b> | 9408                       | 4.72<br>[4.30; 5.16]                                   | 12.27<br>[11.61; 12.94] | 0.26<br>[0.16; 0.37]    | 27.87<br>[26.97; 28.78]   | 1.75<br>[1.50; 2.03]    |                         | 0.35<br>[0.24; 0.48]      | 4.49<br>[4.08; 4.91]    | 1.18<br>[0.97; 1.41]                | 0.35<br>[0.24; 0.48]    |
| <b>Furuse 2017</b>     | 14039                      | 3.16<br>[2.88; 3.46]                                   | 1.25<br>[1.07; 1.44]    | 0.09<br>[0.04; 0.14]    | 0.63<br>[0.51; 0.77]      | 0.20<br>[0.13; 0.28]    | 0.09<br>[0.05; 0.15]    | 0.07<br>[0.03; 0.12]      |                         | 0.10<br>[0.05; 0.16]                | 0.20<br>[0.13; 0.28]    |
| <b>Ernst 2003</b>      | 3535                       | 5.18<br>[4.47; 5.93]                                   | 1.30<br>[0.95; 1.70]    | 0.08<br>[0.02; 0.21]    | 2.46<br>[1.98; 3.00]      | 0.25<br>[0.12; 0.45]    | 1.08<br>[0.76; 1.44]    | 1.44<br>[1.08; 1.86]      |                         | 0.34<br>[0.17; 0.56]                | 5.46<br>[4.74; 6.23]    |
| <b>Odsberg 2001</b>    | 9277                       | 18.44<br>[17.66; 19.24]                                | 0.08<br>[0.03; 0.14]    | 0.05<br>[0.02; 0.11]    | 1.42<br>[1.19; 1.67]      | 2.33<br>[2.03; 2.65]    | 0.18<br>[0.11; 0.28]    | 0.01<br>[0.00; 0.04]      |                         | 0.02<br>[0.00; 0.06]                | 0.06<br>[0.02; 0.13]    |
| <b>Yamashita 1999</b>  | 65482                      | 0.03<br>[0.02; 0.05]                                   | 0.01<br>[0.00; 0.02]    | 0.00<br>[0.00; 0.01]    | 0.00<br>[0.00; 0.01]      | 0.00<br>[0.00; 0.01]    | 0.01<br>[0.00; 0.02]    | 0.00<br>[0.00; 0.01]      |                         | 0.01<br>[0.00; 0.02]                | 0.00<br>[0.00; 0.01]    |
| <b>Park 2009</b>       | 1095                       | 8.40<br>[6.83; 10.12]                                  | 3.38<br>[2.39; 4.53]    |                         | 3.11<br>[2.16; 4.21]      |                         | 0.82<br>[0.37; 1.44]    | 1.46<br>[0.84; 2.26]      |                         |                                     | 0.46<br>[0.14; 0.94]    |
| <b>Leung 2009</b>      | 2000                       | 0.40<br>[0.17; 0.72]                                   |                         |                         |                           |                         |                         |                           |                         |                                     |                         |
| <b>Park 2010</b>       | 3071                       | 1.95<br>[1.49; 2.47]                                   | 0.49<br>[0.27; 0.77]    | 0.10<br>[0.02; 0.24]    | 0.75<br>[0.66; 0.85]      | 0.07<br>[0.01; 0.19]    | 0.03<br>[0.00; 0.13]    | 0.26<br>[0.11; 0.47]      |                         | 0.03<br>[0.00; 0.13]                | 0.03<br>[0.00; 0.13]    |
| <b>White 2001</b>      | 31822                      | 3.09<br>[2.90; 3.28]                                   | 1.15<br>[1.04; 1.27]    | 0.10<br>[0.07; 0.13]    | 4.73<br>[4.50; 4.95]      | 0.98<br>[0.87; 1.09]    | 0.01<br>[0.00; 0.03]    | 0.00<br>[0.00; 0.01]      |                         | 0.02<br>[0.01; 0.04]                | 0.46<br>[0.39; 0.54]    |
| <b>MacPherson 2001</b> | 34407                      | 2.08<br>[1.93; 2.23]                                   | 1.24<br>[1.12; 1.35]    | 0.01<br>[0.00; 0.02]    | 4.73<br>[4.50; 4.95]      | 2.83<br>[2.66; 3.01]    | 0.63<br>[0.55; 0.71]    |                           | 0.51<br>[0.44; 0.59]    | 0.31<br>[0.25; 0.37]                | 0.86<br>[0.76; 0.96]    |
| <b>Fixed effect</b>    |                            | 1.87<br>[1.80; 1.93]                                   | 0.82<br>[0.78; 0.87]    | 0.05<br>[0.04; 0.06]    | 1.08<br>[1.04; 1.13]      | 0.58<br>[0.55; 0.62]    | 0.09<br>[0.07; 0.10]    | 0.03<br>[0.02; 0.04]      | 0.96<br>[0.87; 1.05]    | 0.08<br>[0.07; 0.09]                | 0.23<br>[0.20; 0.25]    |
| <b>Random effect</b>   |                            | 4.92<br>[1.18; 11.01]                                  | 2.43<br>[0.63; 5.35]    | 0.13<br>[0.04; 0.27]    | 2.24<br>[0.21; 6.35]      | 0.84<br>[0.26; 1.75]    | 0.20<br>[0.05; 0.46]    | 0.19<br>[0.02; 0.55]      | 0.73<br>[0.00; 5.02]    | 0.15<br>[0.03; 0.38]                | 0.47<br>[0.03; 1.46]    |
| <b>tau<sup>2</sup></b> |                            | 0.0169                                                 | 0.0095                  | 0.0004                  | 0.0213                    | 0.0055                  | 0.0011                  | 0.0008                    | 0.0085                  | 0.0008                              | 0.0025                  |
| <b>I<sup>2</sup></b>   |                            | 99.9%<br>[99.9%; 99.9%]                                | 99.8%<br>[99.8%; 99.8%] | 96.4%<br>[94.9%; 97.4%] | 99.9%<br>[99.9%; 99.9%]   | 99.7%<br>[99.6%; 99.7%] | 98.4%<br>[97.9%; 98.8%] | 97.5%<br>[96.6%; 98.2%]   | 99.5%<br>[99.4%; 99.7%] | 98.2%<br>[97.6%; 98.6%]             | 99.4%<br>[99.2%; 99.5%] |
| <b>p-value Q-test</b>  |                            | < 0.0001                                               | < 0.0001                | 0.0001                  | < 0.0001                  | < 0.0001                | 0.0001                  | < 0.0001                  | 0.0001                  | 0.0001                              | 0.0001                  |

| Study                  | Total number of treatments | Risk as treatments with AE per 100 treatments [95%-CI] |                        |                        |                           |                         |                         |                         |                |                      |
|------------------------|----------------------------|--------------------------------------------------------|------------------------|------------------------|---------------------------|-------------------------|-------------------------|-------------------------|----------------|----------------------|
|                        |                            | Headache                                               | Cardiovascular system  | Motor system           | Generalized skin reaction | Needling malpractice    | Emotional interference  | Sleeping problems       | Moxibustion AE | Respiratory system   |
| Yamashita2000          | 1441                       | 0.14<br>[0.01; 0.40]                                   |                        |                        |                           | 0.62<br>[0.28; 1.10]    |                         |                         |                |                      |
| daSilva2014            | 13884                      |                                                        |                        |                        |                           | 0.24<br>[0.16; 0.33]    |                         |                         |                |                      |
| Melchart1998           | 1200                       |                                                        | 0.08<br>[0.00; 0.33]   |                        |                           |                         | 0.08<br>[0.00; 0.33]    |                         |                |                      |
| MacPherson2005         | 9408                       |                                                        |                        |                        |                           |                         | 0.67<br>[0.51; 0.84]    |                         |                |                      |
| Furuse2017             | 14039                      | 0.01<br>[0.00; 0.03]                                   | 0.01<br>[0.00; 0.04]   |                        |                           | 0.10<br>[0.05; 0.16]    |                         | 0.17<br>[0.11; 0.25]    |                |                      |
| Ernst2003              | 3535                       | 0.06<br>[0.01; 0.16]                                   | 0.06<br>[0.01; 0.16]   | 0.03<br>[0.00; 0.11]   |                           |                         | 0.11<br>[0.03; 0.25]    |                         |                | 0.03<br>[0.00; 0.11] |
| Odsberg2001            | 9277                       | 0.05<br>[0.02; 0.11]                                   |                        | 0.01<br>[0.00; 0.04]   |                           |                         | 0.04<br>[0.01; 0.10]    |                         |                |                      |
| Yamashita1999          | 65482                      |                                                        |                        |                        |                           | 0.04<br>[0.03; 0.06]    | 0.01<br>[0.00; 0.02]    | 0.01<br>[0.00; 0.02]    |                |                      |
| Park2009               | 1095                       |                                                        |                        |                        |                           |                         |                         |                         |                |                      |
| Leung2009              | 2000                       |                                                        |                        |                        |                           |                         |                         |                         |                |                      |
| Park2010               | 3071                       | 0.03<br>[0.00; 0.13]                                   |                        | 0.10<br>[0.02; 0.24]   |                           | 0.10<br>[0.02; 0.24]    |                         |                         |                |                      |
| White2001              | 31822                      | 0.11<br>[0.08; 0.15]                                   |                        | 0.00<br>[0.00; 0.01]   |                           | 0.15<br>[0.11; 0.19]    | 0.01<br>[0.00; 0.02]    | 0.00<br>[0.00; 0.01]    |                |                      |
| MacPherson2001         | 34407                      | 0.00<br>[0.00; 0.01]                                   |                        | 0.00<br>[0.00; 0.01]   |                           | 0.01<br>[0.00; 0.02]    | 0.01<br>[0.00; 0.03]    | 0.00<br>[0.00; 0.01]    |                |                      |
| <b>Fixed effect</b>    |                            | 0.03<br>[0.02; 0.05]                                   | 0.02<br>[0.01; 0.05]   | 0.01<br>[0.00; 0.01]   |                           | 0.06<br>[0.05; 0.08]    | 0.03<br>[0.02; 0.03]    | 0.01<br>[0.01; 0.02]    |                |                      |
| <b>Random effect</b>   |                            | 0.04<br>[0.01; 0.10]                                   | 0.03<br>[0.00; 0.13]   | 0.01<br>[0.00; 0.04]   |                           | 0.12<br>[0.02; 0.28]    | 0.08<br>[0.00; 0.27]    | 0.02<br>[0.00; 0.18]    |                | 0.03<br>[0.00; 0.11] |
| <b>tau<sup>2</sup></b> |                            | 0.0002                                                 | 0.0001                 | 0.0001                 |                           | 0.0002                  | 0.0004                  | 0.0001                  |                |                      |
| <b>I<sup>2</sup></b>   |                            | 90.3%<br>[82.5%; 94.6%]                                | 21.2%<br>[0.0%; 91.8%] | 58.1%<br>[0.0%; 84.4%] |                           | 95.1%<br>[92.0%; 96.9%] | 96.8%<br>[95.1%; 97.9%] | 95.0%<br>[90.3%; 97.5%] |                |                      |
| <b>p-value Q-test</b>  |                            | 0.0001                                                 | 0.2811                 | 0.0489                 |                           | 0.0001                  | 0.0001                  | 0.0001                  |                |                      |

#### Online supplementary appendix S7: Risks for different types of adverse events per 100 treatments as reported in single studies

Summary risk estimates of adverse events (AE) derived from random effects meta-analyses displayed in table 4
